# Supplementary material
Source: publisher site journal article supplement (https://www.spandidos-publications.com/896/downloadSupplementary)
Supplement: Supplementary file 1 [file downloadSupplementary]

## Sheet: High expression of STAT1
Table SII. GSEA Kyoto Encyclopedia of Genes and Genomes results. GSEA outcomes of the c5 (c5.all.v6.1.symbols.gmt) reference gene set for the key genes in the Janus kinase-signal transducer and activator of transcription signaling pathway in skin cutaneous melanoma. GSEA, gene set enrichment analysis. GSEA, gene set enrich analysis; KEGG, Kyoto Encyclopedia of Genes and Genomes; ES, enrichment sc…
Name	Size	ES	NES	NOM P-value	FDR q-value	FWER p-value	Rank at max	Leading edge
NAKAMURA_METASTASIS	26	0.592525	1.98073	<0.001	1	0.463	2219	tags=58%, list=20%, signal=72%
KIM_BIPOLAR_DISORDER_OLIGODENDROCYTE_DENSITY_CORR_DN	41	0.536967	1.82526	<0.001	1	0.893	2008	tags=51%, list=19%, signal=63%
KEGG_ASTHMA	16	0.800541	1.76368	0.0021322	1	0.965	1269	tags=69%, list=12%, signal=78%
ZHANG_RESPONSE_TO_IKK_INHIBITOR_AND_TNF_UP	120	0.515754	1.86897	0.00217865	1	0.796	2678	tags=54%, list=25%, signal=71%
BROWN_MYELOID_CELL_DEVELOPMENT_DN	74	0.448518	1.79081	0.0039604	1	0.935	1350	tags=32%, list=12%, signal=37%
BIOCARTA_CXCR4_PATHWAY	15	0.64741	1.85343	0.00408163	1	0.826	2661	tags=53%, list=25%, signal=71%
MUELLER_METHYLATED_IN_GLIOBLASTOMA	18	0.654248	1.81212	0.00409836	1	0.917	2121	tags=67%, list=20%, signal=83%
LEE_CALORIE_RESTRICTION_NEOCORTEX_UP	50	0.438407	1.73209	0.00425532	0.895586	0.983	3293	tags=48%, list=30%, signal=69%
BIOCARTA_ALK_PATHWAY	23	0.572265	1.74188	0.00571429	0.961213	0.98	396	tags=22%, list=4%, signal=23%
KYNG_DNA_DAMAGE_BY_UV	43	0.459239	1.73525	0.0059761	0.904311	0.98	2437	tags=47%, list=23%, signal=60%
PID_IFNG_PATHWAY	23	0.613375	1.87478	0.0060241	1	0.785	2607	tags=57%, list=24%, signal=74%
CEBALLOS_TARGETS_OF_TP53_AND_MYC_DN	23	0.527985	1.76531	0.00604839	1	0.964	2566	tags=57%, list=24%, signal=74%
YORDY_RECIPROCAL_REGULATION_BY_ETS1_AND_SP100_DN	48	0.414781	1.64198	0.00606061	0.750695	0.998	1199	tags=25%, list=11%, signal=28%
HOFFMANN_PRE_BI_TO_LARGE_PRE_BII_LYMPHOCYTE_DN	44	0.473998	1.74397	0.00616016	0.984678	0.979	1354	tags=34%, list=13%, signal=39%
BOHN_PRIMARY_IMMUNODEFICIENCY_SYNDROM_DN	23	0.56701	1.76187	0.00619835	1	0.966	1648	tags=39%, list=15%, signal=46%
SCHEIDEREIT_IKK_INTERACTING_PROTEINS	30	0.502232	1.73007	0.00628931	0.85088	0.983	1212	tags=30%, list=11%, signal=34%
TAKEDA_TARGETS_OF_NUP98_HOXA9_FUSION_3D_DN	15	0.692603	1.83811	0.00632911	1	0.869	2066	tags=53%, list=19%, signal=66%
KEGG_ALLOGRAFT_REJECTION	18	0.818344	1.68203	0.00652174	0.792158	0.992	1269	tags=78%, list=12%, signal=88%
LABBE_TARGETS_OF_TGFB1_AND_WNT3A_DN	59	0.43674	1.6754	0.00773694	0.751866	0.995	2349	tags=39%, list=22%, signal=50%
REACTOME_CLASS_A1_RHODOPSIN_LIKE_RECEPTORS	158	0.480658	1.85244	0.00809717	1	0.829	1982	tags=41%, list=18%, signal=50%
WINNEPENNINCKX_MELANOMA_METASTASIS_DN	26	0.65349	1.7561	0.00840336	1	0.973	1406	tags=50%, list=13%, signal=57%
AMUNDSON_GENOTOXIC_SIGNATURE	61	0.414923	1.66309	0.00843882	0.749264	0.998	3384	tags=49%, list=31%, signal=71%
KEGG_INTESTINAL_IMMUNE_NETWORK_FOR_IGA_PRODUCTION	30	0.727747	1.76841	0.00858369	1	0.963	1269	tags=60%, list=12%, signal=68%
BROWNE_HCMV_INFECTION_30MIN_DN	78	0.418021	1.7016	0.00994036	0.78485	0.991	2813	tags=44%, list=26%, signal=58%
MOHANKUMAR_TLX1_TARGETS_DN	97	0.420738	1.62293	0.00996016	0.698581	0.998	2257	tags=35%, list=21%, signal=44%
BEGUM_TARGETS_OF_PAX3_FOXO1_FUSION_DN	29	0.609153	1.77661	0.0100604	1	0.953	1766	tags=48%, list=16%, signal=58%
BIOCARTA_DEATH_PATHWAY	18	0.554314	1.68135	0.0107527	0.779844	0.992	980	tags=33%, list=9%, signal=37%
REACTOME_GPCR_LIGAND_BINDING	216	0.399213	1.60046	0.0120482	0.66891	0.999	1982	tags=37%, list=18%, signal=44%
REACTOME_G_ALPHA_I_SIGNALLING_EVENTS	98	0.466317	1.79996	0.0124481	1	0.929	2103	tags=43%, list=19%, signal=53%
REACTOME_PEPTIDE_LIGAND_BINDING_RECEPTORS	100	0.47622	1.75177	0.0126582	0.96672	0.976	1944	tags=42%, list=18%, signal=51%
CONRAD_STEM_CELL	20	0.543075	1.68246	0.0141414	0.806157	0.992	1599	tags=45%, list=15%, signal=53%
BIOCARTA_SPPA_PATHWAY	15	0.590976	1.70677	0.0141988	0.811325	0.989	2606	tags=47%, list=24%, signal=61%
YU_MYC_TARGETS_DN	31	0.705849	1.73561	0.0150862	0.935222	0.98	1269	tags=68%, list=12%, signal=77%
REACTOME_CHEMOKINE_RECEPTORS_BIND_CHEMOKINES	37	0.649748	1.78017	0.0153846	1	0.949	1868	tags=54%, list=17%, signal=65%
WANG_RESPONSE_TO_BEXAROTENE_DN	18	0.563268	1.7369	0.0162602	0.96101	0.98	2050	tags=39%, list=19%, signal=48%
LABBE_WNT3A_TARGETS_UP	65	0.444156	1.69285	0.016632	0.798057	0.991	1805	tags=32%, list=17%, signal=39%
SHIN_B_CELL_LYMPHOMA_CLUSTER_3	15	0.652135	1.6574	0.0182186	0.740047	0.998	2367	tags=60%, list=22%, signal=77%
REACTOME_GPCR_DOWNSTREAM_SIGNALING	285	0.378554	1.60674	0.0183299	0.707549	0.999	2607	tags=40%, list=24%, signal=51%
BIOCARTA_CCR3_PATHWAY	16	0.540614	1.63165	0.0185567	0.720139	0.998	2606	tags=44%, list=24%, signal=58%
SMID_BREAST_CANCER_LUMINAL_B_DN	303	0.40409	1.61974	0.0185567	0.704981	0.998	2491	tags=41%, list=23%, signal=52%
MAHAJAN_RESPONSE_TO_IL1A_UP	48	0.49513	1.6843	0.0186335	0.830834	0.991	2484	tags=48%, list=23%, signal=62%
LU_IL4_SIGNALING	52	0.509169	1.75264	0.0187891	1	0.974	1934	tags=46%, list=18%, signal=56%
VANASSE_BCL2_TARGETS_UP	20	0.570584	1.70867	0.0199203	0.820834	0.989	1785	tags=50%, list=16%, signal=60%
TAKEDA_TARGETS_OF_NUP98_HOXA9_FUSION_8D_DN	120	0.478404	1.73038	0.0207039	0.876979	0.983	2228	tags=40%, list=21%, signal=50%
KEGG_CYTOKINE_CYTOKINE_RECEPTOR_INTERACTION	148	0.495927	1.71787	0.0209644	0.829828	0.988	2186	tags=46%, list=20%, signal=57%
HELLER_SILENCED_BY_METHYLATION_UP	154	0.431326	1.71558	0.0210526	0.821457	0.988	1871	tags=34%, list=17%, signal=41%
SMID_BREAST_CANCER_RELAPSE_IN_BONE_UP	57	0.418936	1.56415	0.0214844	0.680609	1	2470	tags=40%, list=23%, signal=52%
KEGG_PRIMARY_IMMUNODEFICIENCY	19	0.769085	1.67748	0.0217865	0.770188	0.995	1674	tags=74%, list=15%, signal=87%
PID_CXCR4_PATHWAY	55	0.554648	1.78057	0.022449	1	0.948	2661	tags=49%, list=25%, signal=65%
REACTOME_ACYL_CHAIN_REMODELLING_OF_PE	15	0.573961	1.6025	0.0226804	0.674193	0.999	1235	tags=40%, list=11%, signal=45%
REACTOME_ACYL_CHAIN_REMODELLING_OF_PC	15	0.579722	1.62496	0.0227273	0.714898	0.998	1235	tags=40%, list=11%, signal=45%
SAFFORD_T_LYMPHOCYTE_ANERGY	49	0.395801	1.54796	0.0227743	0.710793	1	1849	tags=31%, list=17%, signal=37%
QI_PLASMACYTOMA_UP	147	0.556738	1.86014	0.0232068	1	0.813	2624	tags=54%, list=24%, signal=70%
SMID_BREAST_CANCER_RELAPSE_IN_BRAIN_DN	49	0.404194	1.57527	0.0238095	0.698122	0.999	1824	tags=33%, list=17%, signal=39%
KYNG_DNA_DAMAGE_DN	121	0.359144	1.52296	0.0239044	0.706701	1	2654	tags=37%, list=25%, signal=49%
PID_HIF2PATHWAY	15	0.543996	1.61108	0.0252101	0.704381	0.999	1812	tags=47%, list=17%, signal=56%
PID_TXA2PATHWAY	34	0.574774	1.72098	0.025641	0.833288	0.985	2284	tags=44%, list=21%, signal=56%
RASHI_RESPONSE_TO_IONIZING_RADIATION_4	34	0.429598	1.57213	0.0259481	0.67584	0.999	1015	tags=24%, list=9%, signal=26%
REACTOME_SIGNALING_BY_GPCR	351	0.339309	1.46949	0.0266393	0.708448	1	1944	tags=30%, list=18%, signal=35%
NEMETH_INFLAMMATORY_RESPONSE_LPS_UP	51	0.509967	1.70432	0.026971	0.788003	0.989	2604	tags=47%, list=24%, signal=62%
KYNG_ENVIRONMENTAL_STRESS_RESPONSE_NOT_BY_GAMMA_IN_WS	25	0.438628	1.50864	0.0272374	0.705358	1	2774	tags=48%, list=26%, signal=64%
KUROZUMI_RESPONSE_TO_ONCOCYTIC_VIRUS	22	0.67531	1.63235	0.0277186	0.726219	0.998	2484	tags=77%, list=23%, signal=100%
LIANG_SILENCED_BY_METHYLATION_UP	22	0.515012	1.56226	0.0287356	0.683246	1	1787	tags=36%, list=17%, signal=43%
FULCHER_INFLAMMATORY_RESPONSE_LECTIN_VS_LPS_UP	314	0.334383	1.52228	0.0289855	0.704736	1	3274	tags=43%, list=30%, signal=60%
KEGG_TYPE_I_DIABETES_MELLITUS	20	0.711114	1.67868	0.0293501	0.779283	0.995	2328	tags=75%, list=21%, signal=95%
TONKS_TARGETS_OF_RUNX1_RUNX1T1_FUSION_HSC_DN	104	0.476315	1.72917	0.029724	0.830407	0.983	2881	tags=50%, list=27%, signal=67%
ABE_VEGFA_TARGETS_2HR	19	0.519074	1.57256	0.0297619	0.679702	0.999	1667	tags=42%, list=15%, signal=50%
RODRIGUES_NTN1_TARGETS_DN	86	0.38431	1.53168	0.0297619	0.715369	1	1737	tags=30%, list=16%, signal=36%
REACTOME_TCR_SIGNALING	31	0.672511	1.75678	0.03125	1	0.972	1630	tags=61%, list=15%, signal=72%
DARWICHE_PAPILLOMA_PROGRESSION_RISK	43	0.382562	1.4616	0.0314961	0.697584	1	2337	tags=40%, list=22%, signal=50%
TAVAZOIE_METASTASIS	62	0.412972	1.47981	0.0322581	0.717305	1	2823	tags=37%, list=26%, signal=50%
PID_CD40_PATHWAY	17	0.556411	1.62646	0.032538	0.726083	0.998	1113	tags=41%, list=10%, signal=46%
NUNODA_RESPONSE_TO_DASATINIB_IMATINIB_UP	20	0.521521	1.6382	0.0327198	0.716992	0.998	2090	tags=45%, list=19%, signal=56%
TARTE_PLASMA_CELL_VS_B_LYMPHOCYTE_DN	19	0.677312	1.67258	0.0329218	0.753168	0.997	864	tags=53%, list=8%, signal=57%
SEKI_INFLAMMATORY_RESPONSE_LPS_UP	47	0.51715	1.67708	0.0331263	0.757583	0.995	2119	tags=51%, list=20%, signal=63%
KLEIN_PRIMARY_EFFUSION_LYMPHOMA_DN	35	0.585996	1.67243	0.033264	0.740386	0.997	2324	tags=57%, list=21%, signal=73%
MIKKELSEN_IPS_ICP_WITH_H3K27ME3	31	0.458533	1.5332	0.0335968	0.730372	1	1726	tags=42%, list=16%, signal=50%
LINDSTEDT_DENDRITIC_CELL_MATURATION_C	37	0.484234	1.62353	0.0340681	0.703844	0.998	1982	tags=41%, list=18%, signal=49%
ONO_FOXP3_TARGETS_DN	21	0.656351	1.71497	0.0344086	0.803119	0.988	1958	tags=62%, list=18%, signal=75%
KEGG_LEISHMANIA_INFECTION	46	0.6248	1.80659	0.035124	1	0.923	1925	tags=57%, list=18%, signal=68%
REACTOME_GENERATION_OF_SECOND_MESSENGER_MOLECULES	15	0.795409	1.65886	0.0357895	0.757738	0.998	1343	tags=80%, list=12%, signal=91%
BIOCARTA_PDGF_PATHWAY	21	0.51957	1.60431	0.0371134	0.688213	0.999	2607	tags=48%, list=24%, signal=63%
SHEN_SMARCA2_TARGETS_DN	176	0.321188	1.35115	0.0376984	0.734749	1	2029	tags=28%, list=19%, signal=34%
RICKMAN_HEAD_AND_NECK_CANCER_E	47	0.597852	1.6985	0.0386965	0.783552	0.991	2072	tags=53%, list=19%, signal=65%
BIOCARTA_KERATINOCYTE_PATHWAY	28	0.525845	1.66614	0.038961	0.746994	0.998	1654	tags=39%, list=15%, signal=46%
TSUNODA_CISPLATIN_RESISTANCE_DN	30	0.48204	1.57118	0.0390625	0.673917	0.999	1725	tags=40%, list=16%, signal=47%
HERNANDEZ_ABERRANT_MITOSIS_BY_DOCETACEL_4NM_UP	15	0.53159	1.5738	0.0391389	0.686047	0.999	3662	tags=60%, list=34%, signal=91%
GUTIERREZ_CHRONIC_LYMPHOCYTIC_LEUKEMIA_DN	37	0.466711	1.58606	0.0391753	0.677149	0.999	2997	tags=41%, list=28%, signal=56%
HENDRICKS_SMARCA4_TARGETS_DN	26	0.468974	1.57472	0.0399202	0.688136	0.999	2223	tags=38%, list=21%, signal=48%
GOLDRATH_ANTIGEN_RESPONSE	213	0.406023	1.61919	0.0414938	0.699255	0.998	2419	tags=40%, list=22%, signal=50%
BIOCARTA_NKT_PATHWAY	20	0.701159	1.68387	0.04158	0.815016	0.991	1120	tags=60%, list=10%, signal=67%
KEGG_JAK_STAT_SIGNALING_PATHWAY	72	0.431269	1.55261	0.041841	0.69642	1	2231	tags=42%, list=21%, signal=52%
GALINDO_IMMUNE_RESPONSE_TO_ENTEROTOXIN	50	0.514833	1.61207	0.0421941	0.708062	0.999	3362	tags=62%, list=31%, signal=90%
REACTOME_MHC_CLASS_II_ANTIGEN_PRESENTATION	40	0.451256	1.56771	0.0425963	0.682567	0.999	2233	tags=50%, list=21%, signal=63%
MARZEC_IL2_SIGNALING_UP	61	0.419577	1.57669	0.0428266	0.698334	0.999	1877	tags=34%, list=17%, signal=41%
SWEET_KRAS_TARGETS_UP	50	0.491372	1.60544	0.0430328	0.697918	0.999	2426	tags=50%, list=22%, signal=64%
JAATINEN_HEMATOPOIETIC_STEM_CELL_DN	132	0.506866	1.72213	0.0431211	0.851858	0.985	2066	tags=43%, list=19%, signal=53%
PID_LYSOPHOSPHOLIPID_PATHWAY	39	0.428269	1.51254	0.0433884	0.712417	1	2799	tags=46%, list=26%, signal=62%
CHIARADONNA_NEOPLASTIC_TRANSFORMATION_KRAS_UP	72	0.431856	1.58641	0.0434783	0.681905	0.999	1958	tags=36%, list=18%, signal=44%
LEONARD_HYPOXIA	25	0.549276	1.59022	0.04375	0.678569	0.999	2426	tags=52%, list=22%, signal=67%
GAL_LEUKEMIC_STEM_CELL_DN	139	0.414914	1.5983	0.0438247	0.664995	0.999	3362	tags=50%, list=31%, signal=71%
PID_CD8_TCR_PATHWAY	28	0.617838	1.63829	0.0440252	0.726765	0.998	1801	tags=61%, list=17%, signal=73%
MIKKELSEN_MCV6_ICP_WITH_H3K27ME3	39	0.423175	1.44755	0.0443548	0.706852	1	1834	tags=36%, list=17%, signal=43%
LIAN_LIPA_TARGETS_3M	28	0.580762	1.65765	0.0449898	0.75125	0.998	2397	tags=54%, list=22%, signal=69%
TSAI_RESPONSE_TO_IONIZING_RADIATION	76	0.33749	1.46729	0.0451745	0.699507	1	2864	tags=41%, list=26%, signal=55%
BIOCARTA_EDG1_PATHWAY	15	0.522595	1.51021	0.0453649	0.703794	1	2607	tags=47%, list=24%, signal=61%
KEGG_HEMATOPOIETIC_CELL_LINEAGE	49	0.587033	1.61742	0.0457516	0.698824	0.999	1094	tags=43%, list=10%, signal=47%
KYNG_ENVIRONMENTAL_STRESS_RESPONSE_UP	37	0.411088	1.48335	0.0462185	0.715124	1	2590	tags=38%, list=24%, signal=50%
LEE_LIVER_CANCER_DENA_DN	43	0.436619	1.45193	0.046332	0.703804	1	2008	tags=37%, list=19%, signal=45%
NABA_MATRISOME_ASSOCIATED	419	0.348125	1.42959	0.0469388	0.700062	1	2484	tags=38%, list=23%, signal=47%
WIERENGA_STAT5A_TARGETS_GROUP1	80	0.373544	1.49788	0.0472279	0.706	1	2682	tags=43%, list=25%, signal=56%
FERRANDO_TAL1_NEIGHBORS	16	0.683658	1.65157	0.0473118	0.73551	0.998	2250	tags=69%, list=21%, signal=87%
PID_TCR_PATHWAY	37	0.623696	1.64909	0.0473118	0.735911	0.998	984	tags=54%, list=9%, signal=59%
REACTOME_IMMUNOREGULATORY_INTERACTIONS_BETWEEN_A_LYMPHOID_AND_A_NON_LYMPHOID_CELL	30	0.686724	1.64713	0.0473118	0.734639	0.998	2491	tags=73%, list=23%, signal=95%
PID_IL8_CXCR2_PATHWAY	20	0.57421	1.61289	0.0477178	0.712099	0.999	2231	tags=50%, list=21%, signal=63%
SHETH_LIVER_CANCER_VS_TXNIP_LOSS_PAM6	30	0.431844	1.46796	0.0481172	0.700328	1	2875	tags=47%, list=27%, signal=63%
KEGG_VIRAL_MYOCARDITIS	38	0.525167	1.59513	0.0483193	0.671439	0.999	1925	tags=47%, list=18%, signal=57%
SHIPP_DLBCL_VS_FOLLICULAR_LYMPHOMA_DN	26	0.651356	1.62608	0.0483517	0.718557	0.998	1206	tags=54%, list=11%, signal=60%
LEE_EARLY_T_LYMPHOCYTE_DN	32	0.600394	1.66888	0.0484211	0.745802	0.998	2361	tags=56%, list=22%, signal=72%
KIM_RESPONSE_TO_TSA_AND_DECITABINE_UP	72	0.413136	1.5119	0.0484211	0.710533	1	2491	tags=38%, list=23%, signal=48%
WORSCHECH_TUMOR_EVASION_AND_TOLEROGENICITY_UP	18	0.611538	1.60833	0.0485232	0.708712	0.999	1739	tags=61%, list=16%, signal=73%
CROMER_TUMORIGENESIS_DN	38	0.496555	1.53165	0.0490798	0.710497	1	1406	tags=39%, list=13%, signal=45%
GAURNIER_PSMD4_TARGETS	42	0.638224	1.60456	0.05	0.694283	0.999	2204	tags=60%, list=20%, signal=74%
YANG_BREAST_CANCER_ESR1_BULK_DN	15	0.50915	1.50092	0.0503876	0.710248	1	2907	tags=53%, list=27%, signal=73%
KEGG_NEUROACTIVE_LIGAND_RECEPTOR_INTERACTION	153	0.358165	1.42254	0.0504032	0.705141	1	2186	tags=38%, list=20%, signal=47%
NABA_SECRETED_FACTORS	182	0.368867	1.428	0.0510638	0.702792	1	1877	tags=34%, list=17%, signal=40%
VILIMAS_NOTCH1_TARGETS_UP	29	0.625738	1.65682	0.0516129	0.71959	0.998	2484	tags=62%, list=23%, signal=80%
BROWNE_HCMV_INFECTION_8HR_UP	53	0.364173	1.43157	0.051756	0.701882	1	2446	tags=34%, list=23%, signal=44%
HOFFMANN_IMMATURE_TO_MATURE_B_LYMPHOCYTE_UP	23	0.46053	1.50817	0.0517928	0.702534	1	1269	tags=30%, list=12%, signal=34%
MATZUK_CENTRAL_FOR_FEMALE_FERTILITY	16	0.50223	1.4706	0.0520833	0.711222	1	2877	tags=56%, list=27%, signal=76%
BIOCARTA_HIVNEF_PATHWAY	28	0.450212	1.53097	0.0521042	0.708478	1	2366	tags=32%, list=22%, signal=41%
FOSTER_TOLERANT_MACROPHAGE_DN	236	0.34483	1.45397	0.0525253	0.702825	1	2892	tags=36%, list=27%, signal=48%
PID_NFAT_TFPATHWAY	24	0.559187	1.58199	0.0526316	0.688909	0.999	1475	tags=46%, list=14%, signal=53%
KUNINGER_IGF1_VS_PDGFB_TARGETS_DN	26	0.418215	1.46396	0.0527383	0.702041	1	1805	tags=35%, list=17%, signal=41%
BOSCO_ALLERGEN_INDUCED_TH2_ASSOCIATED_MODULE	83	0.38566	1.52999	0.0532787	0.70754	1	2799	tags=46%, list=26%, signal=61%
LEE_AGING_CEREBELLUM_UP	50	0.351127	1.40353	0.0532787	0.703341	1	2769	tags=42%, list=26%, signal=56%
LINDSTEDT_DENDRITIC_CELL_MATURATION_D	43	0.505479	1.6353	0.0534653	0.721276	0.998	2066	tags=44%, list=19%, signal=54%
FIRESTEIN_CTNNB1_PATHWAY	18	0.542193	1.54773	0.0540541	0.706379	1	2432	tags=50%, list=22%, signal=64%
SCHRAETS_MLL_TARGETS_DN	16	0.531009	1.47653	0.0544355	0.718342	1	3373	tags=56%, list=31%, signal=82%
KEGG_NATURAL_KILLER_CELL_MEDIATED_CYTOTOXICITY	66	0.470284	1.59319	0.0556745	0.672981	0.999	1124	tags=29%, list=10%, signal=32%
JAZAG_TGFB1_SIGNALING_VIA_SMAD4_DN	39	0.390568	1.41408	0.0557769	0.710797	1	2933	tags=38%, list=27%, signal=53%
PID_IL3_PATHWAY	17	0.516013	1.51095	0.0562249	0.705391	1	1628	tags=35%, list=15%, signal=41%
YAMASHITA_METHYLATED_IN_PROSTATE_CANCER	33	0.450257	1.44649	0.0562771	0.701144	1	1386	tags=36%, list=13%, signal=42%
PID_HIF1_TFPATHWAY	35	0.453054	1.52432	0.0563674	0.706369	1	2875	tags=49%, list=27%, signal=66%
KEGG_GRAFT_VERSUS_HOST_DISEASE	17	0.74122	1.57348	0.0566038	0.681604	0.999	1269	tags=65%, list=12%, signal=73%
WIERENGA_STAT5A_TARGETS_UP	129	0.376343	1.5649	0.0570265	0.683147	0.999	3370	tags=50%, list=31%, signal=71%
PID_IL1_PATHWAY	18	0.476601	1.47324	0.0571429	0.708553	1	2607	tags=56%, list=24%, signal=73%
POOLA_INVASIVE_BREAST_CANCER_UP	147	0.535279	1.70567	0.0572034	0.798163	0.989	1999	tags=46%, list=18%, signal=55%
LABBE_TARGETS_OF_TGFB1_AND_WNT3A_UP	70	0.37989	1.46186	0.0573248	0.703361	1	3164	tags=41%, list=29%, signal=58%
BIOCARTA_TCR_PATHWAY	29	0.494041	1.55893	0.0581162	0.685991	1	2607	tags=38%, list=24%, signal=50%
RICKMAN_TUMOR_DIFFERENTIATED_WELL_VS_MODERATELY_DN	65	0.621765	1.65687	0.0586957	0.730904	0.998	2143	tags=58%, list=20%, signal=72%
KEGG_AMYOTROPHIC_LATERAL_SCLEROSIS_ALS	34	0.385745	1.40733	0.0586957	0.710607	1	1654	tags=29%, list=15%, signal=35%
LIAN_LIPA_TARGETS_6M	36	0.550209	1.63941	0.0588235	0.742581	0.998	2710	tags=56%, list=25%, signal=74%
SAGIV_CD24_TARGETS_UP	15	0.531734	1.48799	0.059761	0.708792	1	2834	tags=53%, list=26%, signal=72%
PID_FCER1_PATHWAY	38	0.501024	1.60555	0.060166	0.704944	0.999	2607	tags=47%, list=24%, signal=62%
PID_ECADHERIN_NASCENT_AJ_PATHWAY	24	0.479367	1.53196	0.060241	0.724759	1	2993	tags=54%, list=28%, signal=75%
MARSON_FOXP3_TARGETS_UP	38	0.498898	1.62428	0.0602911	0.709072	0.998	1819	tags=39%, list=17%, signal=47%
MATSUDA_NATURAL_KILLER_DIFFERENTIATION	281	0.258608	1.30952	0.0602911	0.745933	1	2827	tags=30%, list=26%, signal=40%
KRIEG_HYPOXIA_VIA_KDM3A	31	0.480431	1.53621	0.0604752	0.722737	1	1216	tags=39%, list=11%, signal=43%
VARELA_ZMPSTE24_TARGETS_DN	21	0.457884	1.44738	0.0606654	0.704303	1	2117	tags=43%, list=20%, signal=53%
NAKAMURA_METASTASIS_MODEL_DN	31	0.433232	1.44315	0.0607287	0.695468	1	925	tags=35%, list=9%, signal=39%
KUMAR_TARGETS_OF_MLL_AF9_FUSION	226	0.307412	1.40513	0.0610526	0.707946	1	2435	tags=30%, list=22%, signal=38%
REACTOME_APOPTOTIC_EXECUTION_PHASE	31	0.387952	1.41738	0.0618557	0.712426	1	2439	tags=32%, list=23%, signal=42%
BHATI_G2M_ARREST_BY_2METHOXYESTRADIOL_UP	59	0.397728	1.49608	0.0621118	0.705337	1	2293	tags=36%, list=21%, signal=45%
REACTOME_METABOLISM_OF_STEROID_HORMONES_AND_VITAMINS_A_AND_D	18	0.584062	1.33715	0.0623782	0.735403	1	1787	tags=44%, list=17%, signal=53%
PEDERSEN_METASTASIS_BY_ERBB2_ISOFORM_7	218	0.300283	1.37913	0.0626263	0.718933	1	2743	tags=36%, list=25%, signal=47%
DEURIG_T_CELL_PROLYMPHOCYTIC_LEUKEMIA_DN	172	0.425314	1.52837	0.0630081	0.709066	1	2916	tags=44%, list=27%, signal=60%
LINSLEY_MIR16_TARGETS	108	0.359155	1.46814	0.0630081	0.70295	1	2213	tags=31%, list=20%, signal=38%
MORI_MATURE_B_LYMPHOCYTE_UP	59	0.51045	1.64126	0.0631365	0.743485	0.998	2512	tags=53%, list=23%, signal=68%
REACTOME_IMMUNE_SYSTEM	486	0.348099	1.53182	0.0632653	0.720073	1	2828	tags=39%, list=26%, signal=51%
LINDGREN_BLADDER_CANCER_CLUSTER_2A_DN	79	0.413383	1.52693	0.0634615	0.704908	1	3662	tags=51%, list=34%, signal=76%
TONKS_TARGETS_OF_RUNX1_RUNX1T1_FUSION_MONOCYTE_DN	31	0.497909	1.54423	0.063745	0.705223	1	2228	tags=45%, list=21%, signal=57%
BIOCARTA_EGF_PATHWAY	22	0.456653	1.45579	0.063786	0.699364	1	2607	tags=41%, list=24%, signal=54%
YAGI_AML_WITH_INV_16_TRANSLOCATION	232	0.274731	1.3359	0.0638723	0.733626	1	2422	tags=30%, list=22%, signal=37%
MARTIN_INTERACT_WITH_HDAC	26	0.468795	1.48823	0.0643154	0.71178	1	2367	tags=35%, list=22%, signal=44%
REACTOME_ADAPTIVE_IMMUNE_SYSTEM	294	0.371385	1.56012	0.0644491	0.686559	1	2819	tags=41%, list=26%, signal=55%
MURAKAMI_UV_RESPONSE_6HR_UP	21	0.494126	1.48628	0.06639	0.711633	1	1616	tags=43%, list=15%, signal=50%
BENPORATH_ES_2	27	0.476541	1.49944	0.0667976	0.703709	1	1254	tags=33%, list=12%, signal=38%
WINTER_HYPOXIA_METAGENE	130	0.344268	1.40908	0.0670732	0.70975	1	2454	tags=33%, list=23%, signal=42%
PID_PI3KCI_PATHWAY	31	0.518891	1.60138	0.067086	0.6716	0.999	2713	tags=48%, list=25%, signal=64%
BURTON_ADIPOGENESIS_2	36	0.398815	1.44261	0.0671937	0.694582	1	3927	tags=64%, list=36%, signal=100%
JAZAG_TGFB1_SIGNALING_UP	66	0.307278	1.32108	0.0675944	0.740617	1	2960	tags=33%, list=27%, signal=46%
KYNG_ENVIRONMENTAL_STRESS_RESPONSE_NOT_BY_GAMMA_IN_OLD	21	0.425866	1.39752	0.0676692	0.708943	1	2933	tags=52%, list=27%, signal=72%
SU_PLACENTA	17	0.515028	1.45062	0.0682731	0.705617	1	2448	tags=47%, list=23%, signal=61%
KEGG_CHEMOKINE_SIGNALING_PATHWAY	118	0.413552	1.51841	0.0683761	0.701667	1	2661	tags=43%, list=25%, signal=57%
LABBE_WNT3A_TARGETS_DN	61	0.335713	1.36444	0.0694981	0.734043	1	2654	tags=39%, list=25%, signal=52%
WILLIAMS_ESR1_TARGETS_UP	17	0.534698	1.49955	0.0698603	0.707438	1	2338	tags=41%, list=22%, signal=52%
MENSE_HYPOXIA_UP	54	0.423974	1.5117	0.0699589	0.706835	1	3282	tags=54%, list=30%, signal=77%
SMID_BREAST_CANCER_RELAPSE_IN_BONE_DN	183	0.337697	1.42172	0.0703934	0.705532	1	2498	tags=36%, list=23%, signal=45%
PATTERSON_DOCETAXEL_RESISTANCE	21	0.46611	1.4692	0.0704225	0.705951	1	2524	tags=52%, list=23%, signal=68%
REACTOME_PLATELET_AGGREGATION_PLUG_FORMATION	19	0.550889	1.49219	0.0705882	0.707931	1	1510	tags=32%, list=14%, signal=37%
SEMENZA_HIF1_TARGETS	21	0.546729	1.52066	0.0706861	0.706685	1	2632	tags=57%, list=24%, signal=75%
BURTON_ADIPOGENESIS_PEAK_AT_8HR	23	0.462447	1.4568	0.0706861	0.702062	1	2799	tags=57%, list=26%, signal=76%
KIM_ALL_DISORDERS_CALB1_CORR_DN	18	0.484513	1.43657	0.0709534	0.704347	1	3229	tags=72%, list=30%, signal=103%
BIOCARTA_INFLAM_PATHWAY	15	0.621657	1.54594	0.0712788	0.703273	1	905	tags=40%, list=8%, signal=44%
BIOCARTA_MET_PATHWAY	23	0.45738	1.4822	0.0712871	0.711841	1	2763	tags=52%, list=26%, signal=70%
BILBAN_B_CLL_LPL_DN	26	0.510745	1.49393	0.0714286	0.709391	1	2349	tags=54%, list=22%, signal=69%
SHIPP_DLBCL_CURED_VS_FATAL_UP	21	0.45539	1.39464	0.0714286	0.704172	1	1447	tags=33%, list=13%, signal=38%
BOSCO_TH1_CYTOTOXIC_MODULE	56	0.509408	1.58715	0.0722892	0.685241	0.999	3293	tags=57%, list=30%, signal=82%
KEGG_FC_EPSILON_RI_SIGNALING_PATHWAY	50	0.420268	1.54391	0.0730689	0.701024	1	1344	tags=26%, list=12%, signal=30%
NAKAMURA_METASTASIS_MODEL_UP	24	0.449523	1.45685	0.0737705	0.705173	1	2675	tags=54%, list=25%, signal=72%
PID_NCADHERIN_PATHWAY	19	0.496747	1.46267	0.0738523	0.703585	1	2607	tags=42%, list=24%, signal=55%
OLSSON_E2F3_TARGETS_DN	25	0.481638	1.50074	0.0739958	0.706742	1	1932	tags=36%, list=18%, signal=44%
BOYLAN_MULTIPLE_MYELOMA_C_D_DN	145	0.382363	1.4736	0.074	0.71096	1	2484	tags=39%, list=23%, signal=50%
PID_IL12_2PATHWAY	35	0.598156	1.63898	0.0740741	0.733911	0.998	2874	tags=69%, list=27%, signal=93%
HOFFMANN_SMALL_PRE_BII_TO_IMMATURE_B_LYMPHOCYTE_UP	40	0.516924	1.53307	0.07431	0.725709	1	2275	tags=52%, list=21%, signal=66%
SATO_SILENCED_EPIGENETICALLY_IN_PANCREATIC_CANCER	27	0.434283	1.40665	0.0743982	0.710498	1	2405	tags=44%, list=22%, signal=57%
BIOCARTA_PAR1_PATHWAY	23	0.501851	1.50709	0.075188	0.703052	1	2607	tags=48%, list=24%, signal=63%
KEGG_SYSTEMIC_LUPUS_ERYTHEMATOSUS	71	0.481524	1.55331	0.0756972	0.698497	1	2386	tags=46%, list=22%, signal=59%
KYNG_ENVIRONMENTAL_STRESS_RESPONSE_NOT_BY_4NQO_IN_WS	25	0.394235	1.40406	0.0760234	0.706547	1	2933	tags=44%, list=27%, signal=60%
FALVELLA_SMOKERS_WITH_LUNG_CANCER	42	0.403022	1.45977	0.0774059	0.700931	1	2583	tags=36%, list=24%, signal=47%
SIG_BCR_SIGNALING_PATHWAY	28	0.550597	1.57484	0.0777311	0.693746	0.999	985	tags=32%, list=9%, signal=35%
MANTOVANI_VIRAL_GPCR_SIGNALING_UP	48	0.361322	1.33288	0.0781893	0.737622	1	2064	tags=33%, list=19%, signal=41%
REACTOME_G_ALPHA_Q_SIGNALLING_EVENTS	106	0.342463	1.35473	0.0784708	0.735721	1	2679	tags=41%, list=25%, signal=53%
XU_HGF_SIGNALING_NOT_VIA_AKT1_48HR_UP	26	0.482677	1.47934	0.0785124	0.715133	1	2590	tags=42%, list=24%, signal=55%
JOHNSTONE_PARVB_TARGETS_1_DN	29	0.521086	1.47036	0.0791075	0.708649	1	1622	tags=38%, list=15%, signal=44%
DIRMEIER_LMP1_RESPONSE_EARLY	40	0.478721	1.50647	0.0792683	0.701075	1	2637	tags=52%, list=24%, signal=69%
BROWNE_HCMV_INFECTION_48HR_UP	114	0.286159	1.29604	0.08	0.761794	1	3040	tags=37%, list=28%, signal=51%
PID_BCR_5PATHWAY	47	0.483737	1.56561	0.0801688	0.685816	0.999	2713	tags=45%, list=25%, signal=59%
ZHAN_MULTIPLE_MYELOMA_CD1_AND_CD2_DN	33	0.397622	1.4092	0.0808679	0.712013	1	2280	tags=36%, list=21%, signal=46%
FLECHNER_BIOPSY_KIDNEY_TRANSPLANT_REJECTED_VS_OK_UP	56	0.623859	1.62711	0.0821053	0.732671	0.998	2484	tags=64%, list=23%, signal=83%
ZHANG_GATA6_TARGETS_DN	33	0.42291	1.43922	0.0828157	0.70076	1	2245	tags=45%, list=21%, signal=57%
WANG_BARRETTS_ESOPHAGUS_AND_ESOPHAGUS_CANCER_DN	23	0.658804	1.60258	0.0829876	0.680842	0.999	1518	tags=57%, list=14%, signal=66%
AFFAR_YY1_TARGETS_DN	126	0.360947	1.44347	0.083004	0.697322	1	2134	tags=34%, list=20%, signal=42%
REACTOME_DOWNSTREAM_TCR_SIGNALING	22	0.629269	1.59897	0.083682	0.668906	0.999	2300	tags=64%, list=21%, signal=81%
GEORGANTAS_HSC_MARKERS	35	0.436686	1.4522	0.0847458	0.705927	1	2370	tags=46%, list=22%, signal=58%
ISSAEVA_MLL2_TARGETS	34	0.455098	1.46168	0.0851927	0.700541	1	3573	tags=56%, list=33%, signal=83%
NATSUME_RESPONSE_TO_INTERFERON_BETA_UP	43	0.380239	1.38692	0.0862069	0.706514	1	1739	tags=30%, list=16%, signal=36%
ONO_AML1_TARGETS_DN	20	0.629129	1.54613	0.087146	0.707895	1	1958	tags=65%, list=18%, signal=79%
TAKEDA_TARGETS_OF_NUP98_HOXA9_FUSION_16D_UP	93	0.407594	1.47544	0.0873181	0.707507	1	1145	tags=26%, list=11%, signal=29%
ELVIDGE_HYPOXIA_BY_DMOG_DN	30	0.431929	1.41504	0.0876494	0.715242	1	1223	tags=23%, list=11%, signal=26%
WIERENGA_STAT5A_TARGETS_GROUP2	33	0.45889	1.4488	0.0878661	0.705865	1	3221	tags=55%, list=30%, signal=77%
RICKMAN_TUMOR_DIFFERENTIATED_WELL_VS_POORLY_DN	218	0.473868	1.58068	0.0880503	0.688025	0.999	2534	tags=46%, list=23%, signal=59%
ROSS_ACUTE_MYELOID_LEUKEMIA_CBF	49	0.416832	1.46858	0.0882957	0.704728	1	2949	tags=47%, list=27%, signal=64%
WORSCHECH_TUMOR_REJECTION_UP	32	0.514426	1.51618	0.0895833	0.701903	1	1245	tags=41%, list=11%, signal=46%
PID_CD8_TCR_DOWNSTREAM_PATHWAY	27	0.518212	1.4901	0.0895833	0.708705	1	2606	tags=52%, list=24%, signal=68%
OZEN_MIR125B1_TARGETS	19	0.459429	1.42017	0.0899796	0.708041	1	1908	tags=37%, list=18%, signal=45%
GINESTIER_BREAST_CANCER_20Q13_AMPLIFICATION_DN	86	0.382058	1.43194	0.0903226	0.703529	1	3222	tags=48%, list=30%, signal=67%
GRABARCZYK_BCL11B_TARGETS_DN	34	0.399707	1.41287	0.090535	0.709854	1	1869	tags=35%, list=17%, signal=43%
BIOCARTA_TPO_PATHWAY	15	0.491214	1.42309	0.0910931	0.705983	1	2607	tags=47%, list=24%, signal=61%
LINDSTEDT_DENDRITIC_CELL_MATURATION_B	34	0.486109	1.49768	0.0912863	0.702747	1	2349	tags=47%, list=22%, signal=60%
GENTILE_RESPONSE_CLUSTER_D3	34	0.492749	1.50259	0.0914397	0.708012	1	2907	tags=47%, list=27%, signal=64%
LEE_DIFFERENTIATING_T_LYMPHOCYTE	98	0.557277	1.60347	0.0918367	0.684065	0.999	2553	tags=55%, list=24%, signal=71%
AMIT_EGF_RESPONSE_480_MCF10A	17	0.529985	1.43911	0.0920771	0.698213	1	2505	tags=59%, list=23%, signal=76%
KEGG_STEROID_HORMONE_BIOSYNTHESIS	25	0.499967	1.3509	0.0932039	0.731302	1	1976	tags=48%, list=18%, signal=59%
RASHI_RESPONSE_TO_IONIZING_RADIATION_5	88	0.291179	1.29546	0.093254	0.756432	1	3245	tags=41%, list=30%, signal=58%
BYSTRYKH_HEMATOPOIESIS_STEM_CELL_SCP2_QTL_TRANS	15	0.458104	1.40189	0.0944558	0.70655	1	2781	tags=40%, list=26%, signal=54%
PID_GLYPICAN_1PATHWAY	19	0.465866	1.40369	0.0947776	0.705342	1	1361	tags=32%, list=13%, signal=36%
PHONG_TNF_RESPONSE_NOT_VIA_P38	201	0.319068	1.37309	0.0948454	0.725416	1	2792	tags=36%, list=26%, signal=48%
KEGG_CELL_ADHESION_MOLECULES_CAMS	74	0.474778	1.52037	0.0950413	0.70303	1	2602	tags=46%, list=24%, signal=60%
ALTEMEIER_RESPONSE_TO_LPS_WITH_MECHANICAL_VENTILATION	80	0.477153	1.51699	0.0954357	0.702934	1	2731	tags=49%, list=25%, signal=65%
KEGG_FC_GAMMA_R_MEDIATED_PHAGOCYTOSIS	60	0.385533	1.43154	0.0966387	0.699152	1	2713	tags=45%, list=25%, signal=60%
BROWNE_HCMV_INFECTION_6HR_UP	36	0.398671	1.38792	0.0968379	0.707745	1	2419	tags=36%, list=22%, signal=46%
REACTOME_G_ALPHA_Z_SIGNALLING_EVENTS	28	0.404531	1.36829	0.0969072	0.725865	1	2605	tags=46%, list=24%, signal=61%
ACEVEDO_METHYLATED_IN_LIVER_CANCER_DN	379	0.252572	1.2159	0.0969582	0.778404	1	2331	tags=26%, list=22%, signal=32%
PID_IL23_PATHWAY	23	0.559124	1.52491	0.0969828	0.708783	1	2874	tags=70%, list=27%, signal=94%
KEGG_ETHER_LIPID_METABOLISM	21	0.468941	1.40527	0.0979167	0.710054	1	1604	tags=38%, list=15%, signal=45%
LI_LUNG_CANCER	20	0.483019	1.42664	0.0981595	0.702072	1	2538	tags=35%, list=23%, signal=46%
XU_CREBBP_TARGETS_DN	25	0.45277	1.39961	0.100402	0.704268	1	1693	tags=36%, list=16%, signal=43%
LUI_THYROID_CANCER_CLUSTER_2	23	0.417405	1.37193	0.100592	0.726869	1	2454	tags=39%, list=23%, signal=50%
MIKKELSEN_MEF_LCP_WITH_H3K27ME3	35	0.407184	1.36035	0.100604	0.729866	1	2393	tags=46%, list=22%, signal=58%
QI_HYPOXIA	74	0.348728	1.38286	0.10084	0.710903	1	2426	tags=31%, list=22%, signal=40%
YAUCH_HEDGEHOG_SIGNALING_PARACRINE_DN	150	0.289175	1.24927	0.10099	0.777176	1	2654	tags=35%, list=25%, signal=46%
CHIANG_LIVER_CANCER_SUBCLASS_CTNNB1_DN	94	0.396388	1.42638	0.10124	0.700223	1	2182	tags=40%, list=20%, signal=50%
DORSEY_GAB2_TARGETS	19	0.486333	1.39637	0.10124	0.71039	1	1000	tags=32%, list=9%, signal=35%
KYNG_WERNER_SYNDROM_AND_NORMAL_AGING_UP	58	0.326005	1.29735	0.101449	0.763331	1	2278	tags=29%, list=21%, signal=37%
GREGORY_SYNTHETIC_LETHAL_WITH_IMATINIB	78	0.293744	1.29216	0.101504	0.759308	1	1759	tags=24%, list=16%, signal=29%
OLSSON_E2F3_TARGETS_UP	18	0.516249	1.41268	0.101594	0.707908	1	1843	tags=44%, list=17%, signal=53%
BIOCARTA_BCR_PATHWAY	23	0.448153	1.39608	0.10166	0.706537	1	2606	tags=35%, list=24%, signal=46%
REACTOME_COSTIMULATION_BY_THE_CD28_FAMILY	39	0.514221	1.55759	0.102725	0.686447	1	2607	tags=49%, list=24%, signal=64%
FARMER_BREAST_CANCER_CLUSTER_1	22	0.673261	1.50497	0.103306	0.702594	1	483	tags=32%, list=4%, signal=33%
REACTOME_GASTRIN_CREB_SIGNALLING_PATHWAY_VIA_PKC_AND_MAPK	117	0.328952	1.32329	0.10338	0.737266	1	2679	tags=39%, list=25%, signal=52%
NABA_ECM_AFFILIATED	96	0.354976	1.31448	0.104208	0.74477	1	2408	tags=40%, list=22%, signal=50%
CHIARETTI_T_ALL_REFRACTORY_TO_THERAPY	15	0.522002	1.43444	0.105155	0.706281	1	1602	tags=40%, list=15%, signal=47%
AMUNDSON_RESPONSE_TO_ARSENITE	134	0.283305	1.30715	0.105477	0.747736	1	3639	tags=43%, list=34%, signal=63%
MIKKELSEN_MEF_ICP_WITH_H3K27ME3	104	0.339735	1.33052	0.105691	0.735159	1	2190	tags=36%, list=20%, signal=44%
BIOCARTA_BIOPEPTIDES_PATHWAY	27	0.401781	1.36834	0.106122	0.727953	1	2606	tags=37%, list=24%, signal=49%
MORI_PRE_BI_LYMPHOCYTE_DN	44	0.4616	1.49285	0.10625	0.709535	1	1280	tags=30%, list=12%, signal=33%
LIANG_SILENCED_BY_METHYLATION_2	30	0.481653	1.40632	0.106426	0.709127	1	1797	tags=40%, list=17%, signal=48%
PLASARI_TGFB1_TARGETS_10HR_UP	120	0.391952	1.41503	0.106522	0.712574	1	1888	tags=34%, list=17%, signal=41%
ZHAN_MULTIPLE_MYELOMA_CD1_UP	27	0.417778	1.36336	0.106796	0.735485	1	998	tags=22%, list=9%, signal=24%
KEGG_T_CELL_RECEPTOR_SIGNALING_PATHWAY	69	0.41976	1.46462	0.106918	0.702481	1	2610	tags=42%, list=24%, signal=55%
KYNG_ENVIRONMENTAL_STRESS_RESPONSE_NOT_BY_UV_IN_OLD	15	0.454844	1.37772	0.107143	0.718985	1	2933	tags=53%, list=27%, signal=73%
PID_P38_ALPHA_BETA_PATHWAY	20	0.451044	1.38736	0.107368	0.707226	1	1606	tags=30%, list=15%, signal=35%
LINDGREN_BLADDER_CANCER_CLUSTER_2B	217	0.37481	1.44375	0.107505	0.699219	1	2909	tags=39%, list=27%, signal=52%
SIG_PIP3_SIGNALING_IN_B_LYMPHOCYTES	22	0.489898	1.43577	0.107527	0.704459	1	1607	tags=32%, list=15%, signal=37%
KEGG_NOD_LIKE_RECEPTOR_SIGNALING_PATHWAY	41	0.423958	1.40994	0.108652	0.71481	1	4163	tags=68%, list=38%, signal=111%
TORCHIA_TARGETS_OF_EWSR1_FLI1_FUSION_UP	134	0.274753	1.2705	0.108652	0.770851	1	2072	tags=25%, list=19%, signal=30%
TIAN_TNF_SIGNALING_VIA_NFKB	15	0.591631	1.47064	0.108787	0.714705	1	2610	tags=67%, list=24%, signal=88%
STREICHER_LSM1_TARGETS_DN	17	0.516396	1.41472	0.108787	0.711108	1	2062	tags=53%, list=19%, signal=65%
VERHAAK_GLIOBLASTOMA_MESENCHYMAL	123	0.468472	1.49019	0.109756	0.712244	1	2554	tags=46%, list=24%, signal=60%
KEGG_GNRH_SIGNALING_PATHWAY	63	0.337719	1.36185	0.110169	0.733675	1	1543	tags=22%, list=14%, signal=26%
TENEDINI_MEGAKARYOCYTE_MARKERS	42	0.366607	1.35757	0.11039	0.735162	1	2667	tags=40%, list=25%, signal=53%
CHEN_LUNG_CANCER_SURVIVAL	18	0.474858	1.4006	0.110442	0.706085	1	2769	tags=39%, list=26%, signal=52%
SMID_BREAST_CANCER_NORMAL_LIKE_UP	255	0.46717	1.53789	0.111111	0.721082	1	2020	tags=42%, list=19%, signal=50%
FUJII_YBX1_TARGETS_UP	26	0.444588	1.4163	0.111562	0.713448	1	1379	tags=35%, list=13%, signal=40%
CHEN_ETV5_TARGETS_TESTIS	16	0.572393	1.42416	0.112205	0.705414	1	2730	tags=50%, list=25%, signal=67%
BILBAN_B_CLL_LPL_UP	35	0.38813	1.34612	0.112224	0.736063	1	858	tags=23%, list=8%, signal=25%
PYEON_CANCER_HEAD_AND_NECK_VS_CERVICAL_DN	16	0.577423	1.47572	0.112474	0.710082	1	2759	tags=63%, list=25%, signal=84%
BOHN_PRIMARY_IMMUNODEFICIENCY_SYNDROM_UP	26	0.417949	1.37621	0.112648	0.721904	1	3806	tags=65%, list=35%, signal=101%
THEILGAARD_NEUTROPHIL_AT_SKIN_WOUND_UP	41	0.39407	1.37521	0.112766	0.722859	1	2328	tags=41%, list=21%, signal=53%
VANTVEER_BREAST_CANCER_ESR1_DN	136	0.326058	1.34215	0.113402	0.732651	1	3477	tags=44%, list=32%, signal=64%
PID_GMCSF_PATHWAY	25	0.455477	1.41314	0.113821	0.711437	1	1175	tags=32%, list=11%, signal=36%
MCLACHLAN_DENTAL_CARIES_UP	141	0.50085	1.51898	0.113924	0.703806	1	2351	tags=48%, list=22%, signal=61%
FIGUEROA_AML_METHYLATION_CLUSTER_3_DN	25	0.440939	1.36049	0.114471	0.731631	1	1612	tags=32%, list=15%, signal=38%
THEILGAARD_NEUTROPHIL_AT_SKIN_WOUND_DN	133	0.337215	1.39372	0.114688	0.702206	1	2768	tags=34%, list=26%, signal=45%
BROCKE_APOPTOSIS_REVERSED_BY_IL6	88	0.361089	1.38669	0.115385	0.705031	1	2637	tags=40%, list=24%, signal=52%
ZHENG_FOXP3_TARGETS_UP	17	0.570314	1.44915	0.116279	0.707708	1	1280	tags=41%, list=12%, signal=47%
AMIT_SERUM_RESPONSE_120_MCF10A	39	0.429504	1.43232	0.11753	0.70506	1	2349	tags=44%, list=22%, signal=55%
ROSS_AML_WITH_CBFB_MYH11_FUSION	31	0.46686	1.41858	0.117764	0.710732	1	1319	tags=35%, list=12%, signal=40%
CHYLA_CBFA2T3_TARGETS_UP	210	0.335288	1.4046	0.11811	0.707348	1	1893	tags=30%, list=17%, signal=36%
HOWLIN_CITED1_TARGETS_1_UP	16	0.431127	1.3308	0.118257	0.738119	1	2743	tags=50%, list=25%, signal=67%
SIG_CD40PATHWAYMAP	22	0.447805	1.40005	0.118644	0.705314	1	2610	tags=45%, list=24%, signal=60%
ZHENG_BOUND_BY_FOXP3	266	0.352767	1.38941	0.118952	0.709697	1	2643	tags=37%, list=24%, signal=48%
PID_MET_PATHWAY	46	0.356438	1.3364	0.119141	0.73389	1	2661	tags=35%, list=25%, signal=46%
REACTOME_SIGNALING_BY_ILS	57	0.399952	1.39498	0.119149	0.705506	1	2661	tags=47%, list=25%, signal=62%
LEE_RECENT_THYMIC_EMIGRANT	123	0.337831	1.36127	0.119691	0.731065	1	2916	tags=38%, list=27%, signal=52%
SARRIO_EPITHELIAL_MESENCHYMAL_TRANSITION_DN	80	0.381482	1.37145	0.120083	0.726151	1	1987	tags=34%, list=18%, signal=41%
LANG_MYB_FAMILY_TARGETS	16	0.465222	1.37845	0.12024	0.718942	1	1889	tags=38%, list=17%, signal=45%
PID_NFAT_3PATHWAY	36	0.378592	1.34453	0.12035	0.735041	1	1184	tags=19%, list=11%, signal=22%
REACTOME_HEMOSTASIS	261	0.275816	1.28005	0.12115	0.764825	1	3010	tags=35%, list=28%, signal=47%
LI_INDUCED_T_TO_NATURAL_KILLER_DN	66	0.340647	1.32422	0.121649	0.738004	1	2026	tags=27%, list=19%, signal=33%
REACTOME_IL_3_5_AND_GM_CSF_SIGNALING	24	0.45143	1.36996	0.121951	0.726657	1	2661	tags=46%, list=25%, signal=61%
RUTELLA_RESPONSE_TO_HGF_VS_CSF2RB_AND_IL4_DN	138	0.310109	1.31661	0.123173	0.745136	1	2343	tags=35%, list=22%, signal=44%
RICKMAN_HEAD_AND_NECK_CANCER_C	64	0.531706	1.47807	0.123644	0.71631	1	2840	tags=59%, list=26%, signal=80%
MARTENS_BOUND_BY_PML_RARA_FUSION	253	0.337188	1.38591	0.123967	0.705252	1	2826	tags=37%, list=26%, signal=49%
AKL_HTLV1_INFECTION_DN	35	0.389596	1.35606	0.124272	0.735772	1	2638	tags=37%, list=24%, signal=49%
WANG_TARGETS_OF_MLL_CBP_FUSION_UP	28	0.364517	1.31967	0.125257	0.741005	1	828	tags=25%, list=8%, signal=27%
BASSO_CD40_SIGNALING_UP	60	0.478957	1.48527	0.125261	0.711648	1	2328	tags=45%, list=21%, signal=57%
REACTOME_ANTIGEN_ACTIVATES_B_CELL_RECEPTOR_LEADING_TO_GENERATION_OF_SECOND_MESSENGERS	16	0.581114	1.46728	0.126252	0.696174	1	1646	tags=50%, list=15%, signal=59%
PID_NFKAPPAB_ATYPICAL_PATHWAY	15	0.478946	1.36518	0.126273	0.733668	1	159	tags=20%, list=1%, signal=20%
GUILLAUMOND_KLF10_TARGETS_DN	17	0.460128	1.3511	0.126582	0.732783	1	2803	tags=47%, list=26%, signal=63%
DORN_ADENOVIRUS_INFECTION_12HR_DN	24	0.422373	1.33775	0.127349	0.735399	1	3662	tags=67%, list=34%, signal=101%
ROZANOV_MMP14_TARGETS_DN	21	0.438344	1.34688	0.127615	0.735763	1	1198	tags=29%, list=11%, signal=32%
HIRSCH_CELLULAR_TRANSFORMATION_SIGNATURE_UP	136	0.331246	1.34388	0.127615	0.733117	1	2328	tags=34%, list=21%, signal=43%
GRAHAM_CML_QUIESCENT_VS_NORMAL_QUIESCENT_UP	48	0.406175	1.38876	0.12766	0.709613	1	3424	tags=48%, list=32%, signal=70%
VALK_AML_WITH_FLT3_ITD	18	0.438063	1.34219	0.127971	0.73452	1	524	tags=22%, list=5%, signal=23%
DUNNE_TARGETS_OF_AML1_MTG8_FUSION_UP	30	0.493007	1.45602	0.128571	0.701675	1	1396	tags=40%, list=13%, signal=46%
KENNY_CTNNB1_TARGETS_UP	29	0.379068	1.30966	0.128631	0.747352	1	1722	tags=31%, list=16%, signal=37%
BIOCARTA_INTEGRIN_PATHWAY	21	0.468062	1.3962	0.128713	0.708505	1	2992	tags=52%, list=28%, signal=72%
KEGG_AUTOIMMUNE_THYROID_DISEASE	18	0.6733	1.48281	0.128755	0.713403	1	1269	tags=61%, list=12%, signal=69%
SESTO_RESPONSE_TO_UV_C0	62	0.344331	1.31166	0.128898	0.74654	1	2293	tags=34%, list=21%, signal=43%
LENAOUR_DENDRITIC_CELL_MATURATION_DN	80	0.377618	1.34916	0.129436	0.732657	1	1969	tags=33%, list=18%, signal=39%
REACTOME_INTERFERON_GAMMA_SIGNALING	30	0.627684	1.52701	0.129512	0.709475	1	2494	tags=60%, list=23%, signal=78%
KEGG_VASCULAR_SMOOTH_MUSCLE_CONTRACTION	71	0.341749	1.31525	0.130081	0.744045	1	1953	tags=27%, list=18%, signal=32%
SHEPARD_BMYB_MORPHOLINO_DN	120	0.303975	1.27165	0.130165	0.770708	1	2638	tags=32%, list=24%, signal=41%
MA_MYELOID_DIFFERENTIATION_DN	30	0.391369	1.34149	0.130178	0.73303	1	1626	tags=30%, list=15%, signal=35%
FOSTER_KDM1A_TARGETS_UP	153	0.28935	1.23429	0.130261	0.784946	1	1553	tags=25%, list=14%, signal=29%
GROSS_HYPOXIA_VIA_HIF1A_DN	63	0.325087	1.28813	0.130346	0.761263	1	3662	tags=46%, list=34%, signal=69%
KLEIN_TARGETS_OF_BCR_ABL1_FUSION	27	0.56012	1.44468	0.130802	0.69879	1	1683	tags=52%, list=16%, signal=61%
ELVIDGE_HIF1A_AND_HIF2A_TARGETS_DN	55	0.420561	1.40971	0.130901	0.713067	1	2896	tags=49%, list=27%, signal=67%
ELVIDGE_HYPOXIA_UP	97	0.363572	1.38152	0.13125	0.713098	1	3309	tags=49%, list=31%, signal=71%
MARTORIATI_MDM4_TARGETS_NEUROEPITHELIUM_DN	96	0.339322	1.31918	0.131631	0.740742	1	1389	tags=25%, list=13%, signal=28%
PID_ENDOTHELIN_PATHWAY	39	0.372951	1.33211	0.132797	0.736044	1	2661	tags=36%, list=25%, signal=47%
LIN_SILENCED_BY_TUMOR_MICROENVIRONMENT	62	0.452877	1.40832	0.132911	0.709649	1	1214	tags=29%, list=11%, signal=33%
MARKEY_RB1_CHRONIC_LOF_DN	66	0.420295	1.42779	0.132924	0.700781	1	2412	tags=39%, list=22%, signal=50%
MEISSNER_BRAIN_HCP_WITH_H3_UNMETHYLATED	21	0.418622	1.27995	0.133188	0.763463	1	2096	tags=48%, list=19%, signal=59%
WESTON_VEGFA_TARGETS_3HR	42	0.389492	1.32524	0.13347	0.738418	1	3412	tags=48%, list=32%, signal=69%
PID_PTP1B_PATHWAY	32	0.401756	1.31205	0.134	0.747165	1	2834	tags=41%, list=26%, signal=55%
REACTOME_O_LINKED_GLYCOSYLATION_OF_MUCINS	32	0.410695	1.32885	0.134241	0.734661	1	3096	tags=50%, list=29%, signal=70%
FOSTER_TOLERANT_MACROPHAGE_UP	83	0.344864	1.34236	0.134694	0.736047	1	2349	tags=35%, list=22%, signal=44%
AZARE_STAT3_TARGETS	17	0.469578	1.35743	0.134969	0.733428	1	2909	tags=53%, list=27%, signal=72%
SARTIPY_NORMAL_AT_INSULIN_RESISTANCE_UP	23	0.433463	1.35183	0.134969	0.734546	1	3536	tags=52%, list=33%, signal=77%
REACTOME_CYTOKINE_SIGNALING_IN_IMMUNE_SYSTEM	140	0.372662	1.3952	0.135699	0.707227	1	2828	tags=42%, list=26%, signal=56%
KEGG_OLFACTORY_TRANSDUCTION	43	0.331182	1.21754	0.136082	0.777847	1	484	tags=16%, list=4%, signal=17%
BIOCARTA_FCER1_PATHWAY	27	0.41174	1.34537	0.136821	0.734336	1	2607	tags=33%, list=24%, signal=44%
ENGELMANN_CANCER_PROGENITORS_DN	44	0.375879	1.28236	0.136905	0.766027	1	1315	tags=27%, list=12%, signal=31%
MIKKELSEN_ES_ICP_WITH_H3K4ME3_AND_H3K27ME3	70	0.359291	1.29682	0.137577	0.761189	1	2174	tags=36%, list=20%, signal=44%
LEE_LIVER_CANCER_MYC_E2F1_DN	37	0.401123	1.30625	0.137795	0.745091	1	2302	tags=38%, list=21%, signal=48%
HOFMANN_CELL_LYMPHOMA_DN	20	0.4163	1.33569	0.138211	0.732338	1	2874	tags=45%, list=27%, signal=61%
LI_INDUCED_T_TO_NATURAL_KILLER_UP	184	0.366471	1.38317	0.138655	0.712172	1	2874	tags=45%, list=27%, signal=60%
ST_T_CELL_SIGNAL_TRANSDUCTION	25	0.49798	1.43409	0.138716	0.704569	1	1061	tags=36%, list=10%, signal=40%
MORI_LARGE_PRE_BII_LYMPHOCYTE_DN	29	0.576457	1.47627	0.139434	0.715448	1	2954	tags=72%, list=27%, signal=99%
PID_KIT_PATHWAY	29	0.382923	1.3278	0.139676	0.73426	1	2607	tags=41%, list=24%, signal=54%
ACEVEDO_FGFR1_TARGETS_IN_PROSTATE_CANCER_MODEL_UP	172	0.294616	1.27232	0.139831	0.775337	1	2242	tags=30%, list=21%, signal=37%
FEVR_CTNNB1_TARGETS_UP	372	0.268146	1.23778	0.139959	0.780263	1	2484	tags=30%, list=23%, signal=38%
BROWN_MYELOID_CELL_DEVELOPMENT_UP	94	0.389126	1.35989	0.140496	0.729116	1	2374	tags=35%, list=22%, signal=45%
ONDER_CDH1_TARGETS_2_DN	269	0.430501	1.44523	0.142857	0.699636	1	2773	tags=47%, list=26%, signal=61%
LABBE_TGFB1_TARGETS_UP	59	0.333326	1.25117	0.144289	0.776166	1	1740	tags=29%, list=16%, signal=34%
SCHAEFFER_PROSTATE_DEVELOPMENT_48HR_UP	263	0.295967	1.25715	0.144841	0.781246	1	2994	tags=37%, list=28%, signal=50%
PID_TCR_CALCIUM_PATHWAY	17	0.487675	1.35518	0.144928	0.736514	1	1184	tags=35%, list=11%, signal=40%
TAKEDA_TARGETS_OF_NUP98_HOXA9_FUSION_10D_DN	87	0.391155	1.37343	0.145263	0.726634	1	2245	tags=39%, list=21%, signal=49%
EPPERT_CE_HSC_LSC	16	0.473844	1.33899	0.14553	0.735109	1	1410	tags=38%, list=13%, signal=43%
BRUECKNER_TARGETS_OF_MIRLET7A3_DN	51	0.401723	1.36272	0.145749	0.733053	1	2338	tags=43%, list=22%, signal=55%
WATTEL_AUTONOMOUS_THYROID_ADENOMA_DN	35	0.42216	1.33066	0.146045	0.73662	1	1115	tags=29%, list=10%, signal=32%
ST_B_CELL_ANTIGEN_RECEPTOR	23	0.4836	1.39136	0.146939	0.707832	1	2713	tags=57%, list=25%, signal=75%
WINTER_HYPOXIA_DN	31	0.518326	1.43087	0.147475	0.69865	1	2491	tags=58%, list=23%, signal=75%
NAKAYAMA_SOFT_TISSUE_TUMORS_PCA1_UP	38	0.581412	1.47588	0.148225	0.713215	1	3485	tags=66%, list=32%, signal=97%
YAO_TEMPORAL_RESPONSE_TO_PROGESTERONE_CLUSTER_2	41	0.345972	1.27303	0.14898	0.774864	1	1840	tags=29%, list=17%, signal=35%
SESTO_RESPONSE_TO_UV_C1	50	0.396546	1.339	0.149378	0.73711	1	2258	tags=40%, list=21%, signal=50%
FUJII_YBX1_TARGETS_DN	117	0.417643	1.43408	0.149712	0.701722	1	2383	tags=37%, list=22%, signal=47%
SAGIV_CD24_TARGETS_DN	27	0.420226	1.3006	0.149893	0.754683	1	1984	tags=33%, list=18%, signal=41%
NUMATA_CSF3_SIGNALING_VIA_STAT3	16	0.448309	1.3064	0.150215	0.746381	1	1646	tags=31%, list=15%, signal=37%
DUTTA_APOPTOSIS_VIA_NFKB	16	0.462505	1.34814	0.150407	0.733857	1	3486	tags=69%, list=32%, signal=101%
PID_EPHA_FWDPATHWAY	19	0.426703	1.2952	0.150515	0.755408	1	2661	tags=42%, list=25%, signal=56%
BRUINS_UVC_RESPONSE_VIA_TP53_GROUP_C	45	0.319263	1.24891	0.150905	0.775107	1	3355	tags=49%, list=31%, signal=71%
KEGG_ANTIGEN_PROCESSING_AND_PRESENTATION	37	0.545154	1.45798	0.15102	0.704271	1	2300	tags=46%, list=21%, signal=58%
STEIN_ESRRA_TARGETS_RESPONSIVE_TO_ESTROGEN_DN	23	0.487683	1.35438	0.151515	0.734816	1	2603	tags=43%, list=24%, signal=57%
PASQUALUCCI_LYMPHOMA_BY_GC_STAGE_DN	97	0.351224	1.32949	0.151874	0.736446	1	3621	tags=55%, list=33%, signal=81%
PID_HES_HEY_PATHWAY	25	0.401283	1.26904	0.152918	0.767316	1	2482	tags=44%, list=23%, signal=57%
HOSHIDA_LIVER_CANCER_SURVIVAL_UP	46	0.371267	1.33248	0.153017	0.736818	1	2785	tags=46%, list=26%, signal=61%
VALK_AML_CLUSTER_13	19	0.440113	1.33459	0.154004	0.733862	1	750	tags=26%, list=7%, signal=28%
JACKSON_DNMT1_TARGETS_UP	46	0.340281	1.26975	0.154158	0.771561	1	3440	tags=46%, list=32%, signal=67%
KONDO_PROSTATE_CANCER_WITH_H3K27ME3	89	0.321578	1.22647	0.154599	0.77922	1	2368	tags=36%, list=22%, signal=46%
MCBRYAN_PUBERTAL_TGFB1_TARGETS_DN	39	0.355382	1.26187	0.154639	0.775055	1	2349	tags=33%, list=22%, signal=42%
PID_ARF6_TRAFFICKING_PATHWAY	24	0.411784	1.30081	0.154762	0.755872	1	2548	tags=38%, list=24%, signal=49%
REACTOME_LIPOPROTEIN_METABOLISM	16	0.475627	1.33664	0.155102	0.735121	1	1995	tags=44%, list=18%, signal=54%
BREDEMEYER_RAG_SIGNALING_NOT_VIA_ATM_UP	36	0.34378	1.25637	0.155206	0.778843	1	2151	tags=36%, list=20%, signal=45%
GOTZMANN_EPITHELIAL_TO_MESENCHYMAL_TRANSITION_UP	47	0.399214	1.33971	0.155279	0.736777	1	1162	tags=26%, list=11%, signal=28%
FARDIN_HYPOXIA_11	15	0.512469	1.38989	0.156823	0.710503	1	2454	tags=67%, list=23%, signal=86%
WALLACE_PROSTATE_CANCER_RACE_UP	160	0.457832	1.44604	0.157447	0.699769	1	1985	tags=39%, list=18%, signal=47%
KEGG_VEGF_SIGNALING_PATHWAY	49	0.336932	1.274	0.157447	0.77698	1	2713	tags=31%, list=25%, signal=41%
ALCALA_APOPTOSIS	50	0.351076	1.29567	0.157464	0.757534	1	2797	tags=42%, list=26%, signal=56%
KEGG_LEUKOCYTE_TRANSENDOTHELIAL_MIGRATION	68	0.378771	1.34593	0.158333	0.734594	1	2808	tags=38%, list=26%, signal=51%
SHETH_LIVER_CANCER_VS_TXNIP_LOSS_PAM3	41	0.369832	1.3031	0.159596	0.75176	1	1453	tags=29%, list=13%, signal=34%
FRASOR_TAMOXIFEN_RESPONSE_UP	28	0.363092	1.25219	0.161034	0.777588	1	3128	tags=50%, list=29%, signal=70%
BIOCARTA_NTHI_PATHWAY	15	0.42864	1.27166	0.161157	0.772317	1	1034	tags=27%, list=10%, signal=29%
IVANOVSKA_MIR106B_TARGETS	47	0.355876	1.26514	0.161885	0.768369	1	3343	tags=45%, list=31%, signal=64%
BASSO_CD40_SIGNALING_DN	39	0.443067	1.36873	0.161943	0.728869	1	2124	tags=46%, list=20%, signal=57%
GAVIN_FOXP3_TARGETS_CLUSTER_P2	40	0.372539	1.31319	0.162651	0.747235	1	1819	tags=30%, list=17%, signal=36%
BARIS_THYROID_CANCER_DN	34	0.349125	1.26725	0.163265	0.76636	1	1616	tags=29%, list=15%, signal=34%
STOSSI_RESPONSE_TO_ESTRADIOL	30	0.348921	1.24332	0.163347	0.781845	1	2786	tags=37%, list=26%, signal=49%
LENAOUR_DENDRITIC_CELL_MATURATION_UP	66	0.313205	1.25377	0.165984	0.77892	1	1985	tags=27%, list=18%, signal=33%
SMIRNOV_RESPONSE_TO_IR_6HR_DN	65	0.357283	1.31886	0.165992	0.739958	1	1999	tags=32%, list=18%, signal=39%
KEGG_B_CELL_RECEPTOR_SIGNALING_PATHWAY	50	0.434649	1.38793	0.166667	0.710084	1	1829	tags=36%, list=17%, signal=43%
HADDAD_T_LYMPHOCYTE_AND_NK_PROGENITOR_DN	33	0.462821	1.35398	0.166667	0.731718	1	2020	tags=39%, list=19%, signal=48%
ZHAN_MULTIPLE_MYELOMA_CD1_VS_CD2_DN	29	0.36692	1.25331	0.166667	0.778822	1	487	tags=21%, list=4%, signal=22%
MORI_SMALL_PRE_BII_LYMPHOCYTE_DN	41	0.324238	1.24232	0.166667	0.783226	1	2992	tags=41%, list=28%, signal=57%
RIZKI_TUMOR_INVASIVENESS_2D_DN	42	0.310194	1.21065	0.16701	0.77879	1	2695	tags=36%, list=25%, signal=47%
SATO_SILENCED_BY_METHYLATION_IN_PANCREATIC_CANCER_1	242	0.261389	1.19964	0.167728	0.789908	1	2667	tags=33%, list=25%, signal=42%
BOSCO_EPITHELIAL_DIFFERENTIATION_MODULE	44	0.538858	1.40138	0.169043	0.705797	1	1957	tags=45%, list=18%, signal=55%
KEGG_GLYCEROLIPID_METABOLISM	27	0.382628	1.25529	0.170478	0.780691	1	1553	tags=26%, list=14%, signal=30%
ONDER_CDH1_TARGETS_1_DN	110	0.361884	1.29251	0.171134	0.759941	1	3277	tags=44%, list=30%, signal=62%
HUPER_BREAST_BASAL_VS_LUMINAL_UP	29	0.59151	1.39396	0.171548	0.703888	1	2647	tags=66%, list=24%, signal=86%
WHITFIELD_CELL_CYCLE_G2	105	0.337662	1.32925	0.172023	0.73521	1	2921	tags=39%, list=27%, signal=53%
IVANOVA_HEMATOPOIESIS_LATE_PROGENITOR	295	0.237964	1.19155	0.172345	0.791316	1	3102	tags=34%, list=29%, signal=47%
GRUETZMANN_PANCREATIC_CANCER_UP	203	0.289339	1.23187	0.172557	0.782019	1	1925	tags=26%, list=18%, signal=31%
MA_MYELOID_DIFFERENTIATION_UP	22	0.379327	1.25107	0.174004	0.774829	1	3132	tags=41%, list=29%, signal=57%
HELLER_HDAC_TARGETS_SILENCED_BY_METHYLATION_UP	259	0.24536	1.19488	0.175	0.793311	1	2590	tags=30%, list=24%, signal=39%
HAHTOLA_SEZARY_SYNDROM_DN	21	0.485537	1.36325	0.175758	0.733656	1	2790	tags=48%, list=26%, signal=64%
GUO_TARGETS_OF_IRS1_AND_IRS2	58	0.316943	1.21421	0.175758	0.777836	1	2134	tags=28%, list=20%, signal=34%
HUANG_GATA2_TARGETS_UP	83	0.355461	1.28557	0.175983	0.762327	1	2870	tags=36%, list=27%, signal=49%
GOZGIT_ESR1_TARGETS_UP	77	0.31729	1.21962	0.176	0.774414	1	3610	tags=49%, list=33%, signal=74%
SENGUPTA_NASOPHARYNGEAL_CARCINOMA_WITH_LMP1_DN	109	0.360695	1.28354	0.17623	0.765528	1	1870	tags=30%, list=17%, signal=36%
ELVIDGE_HIF1A_TARGETS_UP	35	0.397905	1.32282	0.176707	0.736894	1	714	tags=17%, list=7%, signal=18%
PID_ARF6_PATHWAY	22	0.385495	1.24858	0.176955	0.774624	1	496	tags=18%, list=5%, signal=19%
TONKS_TARGETS_OF_RUNX1_RUNX1T1_FUSION_GRANULOCYTE_UP	33	0.369685	1.25387	0.177264	0.780217	1	2080	tags=36%, list=19%, signal=45%
ST_TUMOR_NECROSIS_FACTOR_PATHWAY	15	0.462941	1.29015	0.17732	0.760285	1	2610	tags=47%, list=24%, signal=61%
WIELAND_UP_BY_HBV_INFECTION	56	0.566913	1.44717	0.178344	0.70196	1	2553	tags=52%, list=24%, signal=67%
REACTOME_STRIATED_MUSCLE_CONTRACTION	15	0.589174	1.2858	0.178357	0.763304	1	1738	tags=53%, list=16%, signal=63%
HOOI_ST7_TARGETS_UP	51	0.327096	1.21374	0.178645	0.777884	1	1797	tags=27%, list=17%, signal=33%
BIOCARTA_MYOSIN_PATHWAY	16	0.45064	1.28345	0.178988	0.764087	1	2605	tags=44%, list=24%, signal=58%
SMID_BREAST_CANCER_RELAPSE_IN_BRAIN_UP	24	0.396133	1.26082	0.179389	0.776593	1	2447	tags=42%, list=23%, signal=54%
WIEDERSCHAIN_TARGETS_OF_BMI1_AND_PCGF2	33	0.432973	1.30528	0.179487	0.746379	1	3164	tags=61%, list=29%, signal=85%
SERVITJA_LIVER_HNF1A_TARGETS_DN	77	0.326196	1.22116	0.179641	0.77394	1	2089	tags=26%, list=19%, signal=32%
BIOCARTA_PPARA_PATHWAY	31	0.350879	1.2475	0.179842	0.774859	1	2231	tags=29%, list=21%, signal=36%
PID_INTEGRIN_A4B1_PATHWAY	19	0.424737	1.3081	0.18	0.746589	1	1030	tags=26%, list=10%, signal=29%
GRAESSMANN_RESPONSE_TO_MC_AND_DOXORUBICIN_UP	342	0.287521	1.24972	0.180498	0.777345	1	3144	tags=36%, list=29%, signal=49%
JAEGER_METASTASIS_DN	151	0.542609	1.44192	0.181628	0.694261	1	2121	tags=50%, list=20%, signal=61%
SUNG_METASTASIS_STROMA_DN	29	0.398192	1.26804	0.181628	0.768685	1	2193	tags=31%, list=20%, signal=39%
YAO_TEMPORAL_RESPONSE_TO_PROGESTERONE_CLUSTER_9	42	0.34653	1.23999	0.181818	0.781096	1	1549	tags=26%, list=14%, signal=30%
ZHANG_ANTIVIRAL_RESPONSE_TO_RIBAVIRIN_DN	29	0.415248	1.29718	0.182377	0.762031	1	2159	tags=38%, list=20%, signal=47%
SCHLINGEMANN_SKIN_CARCINOGENESIS_TPA_UP	18	0.533976	1.31161	0.182773	0.744884	1	2150	tags=56%, list=20%, signal=69%
FISCHER_G1_S_CELL_CYCLE	121	0.321859	1.26212	0.183468	0.775904	1	1765	tags=24%, list=16%, signal=28%
BLALOCK_ALZHEIMERS_DISEASE_INCIPIENT_UP	219	0.250087	1.1753	0.184162	0.79847	1	2170	tags=24%, list=20%, signal=30%
GROSS_HYPOXIA_VIA_ELK3_AND_HIF1A_UP	82	0.319919	1.25865	0.184524	0.781561	1	3282	tags=43%, list=30%, signal=61%
PID_IL2_1PATHWAY	31	0.402364	1.31606	0.185031	0.744947	1	1175	tags=29%, list=11%, signal=32%
ACEVEDO_LIVER_CANCER_WITH_H3K27ME3_UP	138	0.301433	1.22133	0.185111	0.774754	1	2145	tags=28%, list=20%, signal=34%
MORI_IMMATURE_B_LYMPHOCYTE_UP	32	0.463303	1.36182	0.185185	0.73156	1	2014	tags=44%, list=19%, signal=54%
ZHENG_FOXP3_TARGETS_IN_T_LYMPHOCYTE_DN	15	0.510543	1.31526	0.185484	0.745868	1	2622	tags=47%, list=24%, signal=61%
RODRIGUES_NTN1_AND_DCC_TARGETS	20	0.436794	1.28821	0.185714	0.762801	1	3019	tags=50%, list=28%, signal=69%
COATES_MACROPHAGE_M1_VS_M2_UP	51	0.344509	1.24903	0.185859	0.776324	1	2072	tags=27%, list=19%, signal=34%
NIKOLSKY_BREAST_CANCER_20Q12_Q13_AMPLICON	75	0.418625	1.33885	0.186047	0.733555	1	4256	tags=65%, list=39%, signal=107%
KEGG_LONG_TERM_DEPRESSION	43	0.319199	1.22211	0.186192	0.775304	1	1344	tags=23%, list=12%, signal=26%
REACTOME_CELL_SURFACE_INTERACTIONS_AT_THE_VASCULAR_WALL	45	0.340283	1.23129	0.186613	0.782187	1	763	tags=18%, list=7%, signal=19%
SANSOM_APC_TARGETS_DN	199	0.324528	1.27342	0.186858	0.777102	1	2284	tags=30%, list=21%, signal=37%
REACTOME_IL_2_SIGNALING	20	0.440669	1.30663	0.1893	0.747489	1	1124	tags=25%, list=10%, signal=28%
ODONNELL_TARGETS_OF_MYC_AND_TFRC_DN	24	0.553638	1.37122	0.189349	0.724666	1	3503	tags=63%, list=32%, signal=92%
GRAHAM_CML_DIVIDING_VS_NORMAL_QUIESCENT_DN	59	0.377091	1.29074	0.189409	0.761967	1	2370	tags=41%, list=22%, signal=52%
MARKEY_RB1_ACUTE_LOF_DN	145	0.371804	1.32481	0.189583	0.737882	1	2541	tags=40%, list=23%, signal=52%
BERTUCCI_MEDULLARY_VS_DUCTAL_BREAST_CANCER_UP	115	0.390005	1.34398	0.189765	0.734813	1	2610	tags=37%, list=24%, signal=49%
ACEVEDO_LIVER_CANCER_WITH_H3K27ME3_DN	110	0.278214	1.19295	0.189922	0.793627	1	1964	tags=26%, list=18%, signal=32%
BRUINS_UVC_RESPONSE_VIA_TP53_GROUP_B	313	0.257703	1.19004	0.191532	0.792128	1	2538	tags=29%, list=23%, signal=37%
SHAFFER_IRF4_TARGETS_IN_ACTIVATED_DENDRITIC_CELL	37	0.384964	1.26551	0.192385	0.770373	1	3402	tags=51%, list=31%, signal=75%
REACTOME_G1_PHASE	18	0.419828	1.25238	0.193089	0.778558	1	1994	tags=44%, list=18%, signal=54%
PETRETTO_HEART_MASS_QTL_CIS_UP	17	0.435318	1.28108	0.193227	0.766735	1	3095	tags=59%, list=29%, signal=82%
FORTSCHEGGER_PHF8_TARGETS_DN	427	0.238595	1.1828	0.193738	0.798931	1	3627	tags=39%, list=33%, signal=57%
NABA_ECM_REGULATORS	141	0.329378	1.23485	0.19375	0.78474	1	3097	tags=44%, list=29%, signal=61%
KOINUMA_TARGETS_OF_SMAD2_OR_SMAD3	486	0.265289	1.21209	0.194154	0.777351	1	2905	tags=34%, list=27%, signal=45%
DELPUECH_FOXO3_TARGETS_UP	47	0.379396	1.2942	0.195072	0.756572	1	1779	tags=30%, list=16%, signal=35%
ZHANG_TARGETS_OF_EWSR1_FLI1_FUSION	57	0.317355	1.22203	0.195072	0.774156	1	2940	tags=39%, list=27%, signal=53%
EPPERT_HSC_R	55	0.341443	1.23269	0.195122	0.785509	1	2283	tags=35%, list=21%, signal=44%
PID_FAS_PATHWAY	23	0.351264	1.20008	0.195312	0.791271	1	3011	tags=35%, list=28%, signal=48%
NIKOLSKY_BREAST_CANCER_12Q13_Q21_AMPLICON	21	0.512196	1.32072	0.195519	0.739746	1	2938	tags=67%, list=27%, signal=91%
CARD_MIR302A_TARGETS	39	0.355963	1.25187	0.195857	0.775516	1	2571	tags=36%, list=24%, signal=47%
REACTOME_AMINE_COMPOUND_SLC_TRANSPORTERS	19	0.40606	1.23226	0.196078	0.783796	1	191	tags=21%, list=2%, signal=21%
BROWNE_HCMV_INFECTION_8HR_DN	21	0.386576	1.23232	0.196116	0.785123	1	1512	tags=33%, list=14%, signal=39%
CHIARADONNA_NEOPLASTIC_TRANSFORMATION_KRAS_CDC25_UP	32	0.382715	1.23783	0.196819	0.783081	1	2857	tags=41%, list=26%, signal=55%
GRAESSMANN_APOPTOSIS_BY_SERUM_DEPRIVATION_DN	133	0.28737	1.19358	0.197065	0.794447	1	2846	tags=33%, list=26%, signal=44%
MIKKELSEN_ES_ICP_WITH_H3K27ME3	21	0.398817	1.23063	0.197266	0.778425	1	3396	tags=52%, list=31%, signal=76%
WHITEHURST_PACLITAXEL_SENSITIVITY	20	0.37471	1.23006	0.197292	0.777187	1	4710	tags=70%, list=43%, signal=124%
KEGG_HYPERTROPHIC_CARDIOMYOPATHY_HCM	53	0.367902	1.25672	0.19798	0.780906	1	2651	tags=36%, list=24%, signal=47%
NAKAJIMA_EOSINOPHIL	15	0.506234	1.3095	0.198783	0.744169	1	1830	tags=47%, list=17%, signal=56%
REACTOME_PLATELET_ACTIVATION_SIGNALING_AND_AGGREGATION	124	0.298546	1.21264	0.199203	0.777087	1	2713	tags=31%, list=25%, signal=40%
RUTELLA_RESPONSE_TO_CSF2RB_AND_IL4_DN	191	0.319254	1.27325	0.199593	0.775891	1	2328	tags=32%, list=21%, signal=41%
ICHIBA_GRAFT_VERSUS_HOST_DISEASE_35D_UP	78	0.453141	1.35412	0.2	0.733462	1	3250	tags=60%, list=30%, signal=85%
IWANAGA_CARCINOGENESIS_BY_KRAS_PTEN_UP	104	0.265767	1.15502	0.2	0.799893	1	2129	tags=25%, list=20%, signal=31%
GRAHAM_CML_QUIESCENT_VS_NORMAL_QUIESCENT_DN	27	0.422172	1.28925	0.200795	0.761277	1	2370	tags=44%, list=22%, signal=57%
GAVIN_FOXP3_TARGETS_CLUSTER_P3	87	0.320273	1.2468	0.201161	0.775473	1	2522	tags=34%, list=23%, signal=45%
FRIDMAN_SENESCENCE_UP	48	0.360927	1.25255	0.201258	0.779587	1	1779	tags=27%, list=16%, signal=32%
REACTOME_PURINE_METABOLISM	22	0.37798	1.21818	0.202083	0.777342	1	2072	tags=27%, list=19%, signal=34%
VALK_AML_CLUSTER_11	19	0.409087	1.24005	0.202381	0.78245	1	733	tags=21%, list=7%, signal=23%
AMIT_EGF_RESPONSE_480_HELA	97	0.367926	1.27085	0.202505	0.77145	1	3459	tags=54%, list=32%, signal=78%
GU_PDEF_TARGETS_DN	28	0.400804	1.22475	0.203252	0.775837	1	1009	tags=21%, list=9%, signal=24%
PID_VEGFR1_2_PATHWAY	36	0.326475	1.20293	0.203704	0.786664	1	2834	tags=31%, list=26%, signal=41%
RUTELLA_RESPONSE_TO_CSF2RB_AND_IL4_UP	178	0.261089	1.18819	0.205021	0.791038	1	2343	tags=29%, list=22%, signal=36%
GENTILE_UV_RESPONSE_CLUSTER_D2	23	0.438093	1.26975	0.205479	0.769925	1	2829	tags=39%, list=26%, signal=53%
DARWICHE_PAPILLOMA_RISK_HIGH_UP	81	0.311008	1.22557	0.205567	0.780457	1	2361	tags=30%, list=22%, signal=38%
RAMALHO_STEMNESS_DN	51	0.380198	1.28125	0.205821	0.767866	1	2065	tags=35%, list=19%, signal=43%
BILD_HRAS_ONCOGENIC_SIGNATURE	149	0.333039	1.26745	0.206122	0.768889	1	2647	tags=38%, list=24%, signal=50%
LEE_LIVER_CANCER_E2F1_DN	33	0.381316	1.2237	0.206564	0.774762	1	2302	tags=39%, list=21%, signal=50%
REACTOME_FACTORS_INVOLVED_IN_MEGAKARYOCYTE_DEVELOPMENT_AND_PLATELET_PRODUCTION	69	0.287127	1.1923	0.206693	0.790443	1	2615	tags=33%, list=24%, signal=44%
ODONNELL_TFRC_TARGETS_UP	207	0.250164	1.16008	0.206759	0.796161	1	3044	tags=35%, list=28%, signal=48%
LINDSTEDT_DENDRITIC_CELL_MATURATION_A	44	0.41578	1.28433	0.207343	0.764671	1	1164	tags=30%, list=11%, signal=33%
KEGG_APOPTOSIS	48	0.313193	1.18911	0.207424	0.79219	1	2328	tags=29%, list=21%, signal=37%
KYNG_DNA_DAMAGE_BY_GAMMA_AND_UV_RADIATION	57	0.299689	1.19303	0.207767	0.79473	1	508	tags=16%, list=5%, signal=16%
PEDRIOLI_MIR31_TARGETS_UP	111	0.28056	1.16975	0.207767	0.799708	1	2366	tags=31%, list=22%, signal=39%
GEORGES_CELL_CYCLE_MIR192_TARGETS	41	0.450481	1.32832	0.208872	0.73441	1	1600	tags=34%, list=15%, signal=40%
ZHENG_GLIOBLASTOMA_PLASTICITY_DN	34	0.349417	1.22464	0.209804	0.774785	1	2834	tags=35%, list=26%, signal=48%
PID_IL8_CXCR1_PATHWAY	16	0.446395	1.25723	0.209979	0.782641	1	2231	tags=38%, list=21%, signal=47%
KEGG_ACUTE_MYELOID_LEUKEMIA	38	0.387125	1.28053	0.210856	0.765097	1	2793	tags=42%, list=26%, signal=57%
MIKKELSEN_MCV6_LCP_WITH_H3K4ME3	91	0.347911	1.25489	0.211066	0.780255	1	1285	tags=24%, list=12%, signal=27%
ELVIDGE_HYPOXIA_BY_DMOG_UP	71	0.343823	1.22525	0.211297	0.779986	1	3309	tags=49%, list=31%, signal=71%
BAUS_TFF2_TARGETS_UP	21	0.482864	1.32648	0.211417	0.736473	1	1005	tags=29%, list=9%, signal=31%
REACTOME_APOPTOTIC_CLEAVAGE_OF_CELLULAR_PROTEINS	22	0.354903	1.19788	0.211499	0.792403	1	2439	tags=32%, list=23%, signal=41%
HADDAD_B_LYMPHOCYTE_PROGENITOR	148	0.298088	1.22302	0.212598	0.775396	1	2993	tags=37%, list=28%, signal=51%
CHARAFE_BREAST_CANCER_LUMINAL_VS_BASAL_DN	254	0.309145	1.24068	0.213147	0.783639	1	2066	tags=28%, list=19%, signal=34%
RUTELLA_RESPONSE_TO_HGF_DN	141	0.321701	1.24797	0.21328	0.77489	1	2337	tags=33%, list=22%, signal=41%
MADAN_DPPA4_TARGETS	28	0.387393	1.22966	0.213693	0.776967	1	1810	tags=36%, list=17%, signal=43%
DORN_ADENOVIRUS_INFECTION_32HR_DN	28	0.379744	1.23272	0.214	0.786871	1	3662	tags=57%, list=34%, signal=86%
FIGUEROA_AML_METHYLATION_CLUSTER_6_DN	16	0.439037	1.24517	0.215164	0.777635	1	1520	tags=31%, list=14%, signal=36%
SMID_BREAST_CANCER_RELAPSE_IN_PLEURA_DN	17	0.450461	1.23721	0.215569	0.778895	1	2498	tags=53%, list=23%, signal=69%
REACTOME_TRANSPORT_TO_THE_GOLGI_AND_SUBSEQUENT_MODIFICATION	17	0.430384	1.21631	0.216	0.778625	1	3136	tags=47%, list=29%, signal=66%
ROZANOV_MMP14_TARGETS_UP	150	0.279352	1.17734	0.21627	0.799927	1	2636	tags=34%, list=24%, signal=44%
ZUCCHI_METASTASIS_DN	26	0.43436	1.25744	0.216769	0.78364	1	3193	tags=46%, list=29%, signal=65%
SARRIO_EPITHELIAL_MESENCHYMAL_TRANSITION_UP	112	0.372531	1.27459	0.217039	0.776899	1	3567	tags=52%, list=33%, signal=76%
KEGG_PENTOSE_PHOSPHATE_PATHWAY	16	0.493156	1.31225	0.218	0.748407	1	2671	tags=50%, list=25%, signal=66%
RAMASWAMY_METASTASIS_DN	29	0.325151	1.17851	0.218107	0.800195	1	1805	tags=24%, list=17%, signal=29%
NGUYEN_NOTCH1_TARGETS_DN	44	0.32784	1.18834	0.218623	0.793199	1	3551	tags=48%, list=33%, signal=71%
YAUCH_HEDGEHOG_SIGNALING_PARACRINE_UP	80	0.296678	1.16538	0.218935	0.797693	1	1336	tags=23%, list=12%, signal=25%
ZWANG_CLASS_1_TRANSIENTLY_INDUCED_BY_EGF	276	0.270542	1.17024	0.219368	0.79951	1	2844	tags=35%, list=26%, signal=46%
ICHIBA_GRAFT_VERSUS_HOST_DISEASE_D7_UP	64	0.474301	1.34924	0.219462	0.734493	1	2954	tags=53%, list=27%, signal=73%
MORI_PRE_BI_LYMPHOCYTE_UP	48	0.434929	1.29576	0.219713	0.760825	1	3221	tags=46%, list=30%, signal=65%
GAUSSMANN_MLL_AF4_FUSION_TARGETS_F_DN	27	0.379062	1.20178	0.219917	0.787511	1	1049	tags=33%, list=10%, signal=37%
LEIN_ASTROCYTE_MARKERS	23	0.390172	1.22498	0.219959	0.778002	1	2769	tags=39%, list=26%, signal=52%
SHEPARD_BMYB_TARGETS	45	0.372335	1.26946	0.220077	0.767606	1	3503	tags=53%, list=32%, signal=79%
ZHOU_CELL_CYCLE_GENES_IN_IR_RESPONSE_6HR	52	0.48692	1.35378	0.220238	0.730281	1	3650	tags=58%, list=34%, signal=87%
GEISS_RESPONSE_TO_DSRNA_UP	19	0.453536	1.26961	0.220238	0.768713	1	3465	tags=68%, list=32%, signal=100%
MCDOWELL_ACUTE_LUNG_INJURY_UP	35	0.391163	1.2267	0.220339	0.780029	1	2066	tags=40%, list=19%, signal=49%
MIKKELSEN_IPS_ICP_WITH_H3K4ME3_AND_H327ME3	69	0.327733	1.20314	0.220408	0.787384	1	2975	tags=42%, list=27%, signal=58%
JIANG_AGING_CEREBRAL_CORTEX_UP	22	0.380023	1.22784	0.221116	0.779415	1	1162	tags=23%, list=11%, signal=25%
ZHONG_RESPONSE_TO_AZACITIDINE_AND_TSA_UP	99	0.255472	1.14488	0.221782	0.797759	1	2675	tags=35%, list=25%, signal=47%
LIU_VMYB_TARGETS_UP	78	0.270442	1.1609	0.222	0.797435	1	2527	tags=28%, list=23%, signal=37%
THILLAINADESAN_ZNF217_TARGETS_UP	24	0.407288	1.23763	0.222445	0.779232	1	3678	tags=54%, list=34%, signal=82%
BIOCARTA_EIF4_PATHWAY	17	0.395654	1.21542	0.222656	0.777025	1	205	tags=12%, list=2%, signal=12%
ZHAN_MULTIPLE_MYELOMA_DN	23	0.432982	1.2386	0.223553	0.782441	1	2026	tags=43%, list=19%, signal=53%
BIOCARTA_RACCYCD_PATHWAY	15	0.435175	1.22215	0.223819	0.77658	1	2607	tags=40%, list=24%, signal=53%
VALK_AML_CLUSTER_5	15	0.55143	1.29576	0.223938	0.759039	1	2494	tags=47%, list=23%, signal=61%
OSADA_ASCL1_TARGETS_DN	16	0.484543	1.28097	0.224242	0.76541	1	3573	tags=69%, list=33%, signal=102%
FLOTHO_PEDIATRIC_ALL_THERAPY_RESPONSE_DN	16	0.437732	1.23426	0.224409	0.783538	1	3419	tags=50%, list=32%, signal=73%
CHNG_MULTIPLE_MYELOMA_HYPERPLOID_DN	15	0.439164	1.2319	0.224576	0.783408	1	1271	tags=33%, list=12%, signal=38%
ZHAN_EARLY_DIFFERENTIATION_GENES_DN	28	0.439941	1.30109	0.226337	0.756768	1	1412	tags=36%, list=13%, signal=41%
FRIDMAN_IMMORTALIZATION_DN	21	0.391393	1.21024	0.226415	0.77732	1	1779	tags=29%, list=16%, signal=34%
OKUMURA_INFLAMMATORY_RESPONSE_LPS	108	0.26092	1.14704	0.226562	0.800414	1	2726	tags=34%, list=25%, signal=45%
REACTOME_CD28_CO_STIMULATION	17	0.414276	1.21318	0.226908	0.77688	1	603	tags=18%, list=6%, signal=19%
SHIN_B_CELL_LYMPHOMA_CLUSTER_8	23	0.426472	1.23016	0.227557	0.778369	1	3902	tags=61%, list=36%, signal=95%
BURTON_ADIPOGENESIS_PEAK_AT_16HR	26	0.450138	1.27621	0.228	0.773469	1	3522	tags=54%, list=33%, signal=80%
HUMMERICH_SKIN_CANCER_PROGRESSION_UP	61	0.370471	1.2378	0.229258	0.781677	1	3193	tags=48%, list=29%, signal=67%
OSADA_ASCL1_TARGETS_UP	25	0.399027	1.19062	0.229675	0.792943	1	2861	tags=48%, list=26%, signal=65%
VANASSE_BCL2_TARGETS_DN	42	0.336576	1.19667	0.230932	0.793177	1	2361	tags=38%, list=22%, signal=49%
PID_EPHRINB_REV_PATHWAY	19	0.444298	1.22408	0.231537	0.775044	1	2799	tags=37%, list=26%, signal=50%
GAVIN_FOXP3_TARGETS_CLUSTER_T4	56	0.31993	1.20373	0.231579	0.787026	1	1333	tags=25%, list=12%, signal=28%
RICKMAN_METASTASIS_DN	135	0.414893	1.28643	0.231915	0.763175	1	2626	tags=41%, list=24%, signal=54%
MEISSNER_NPC_HCP_WITH_H3_UNMETHYLATED	275	0.280096	1.19592	0.232033	0.794192	1	2316	tags=32%, list=21%, signal=40%
DIAZ_CHRONIC_MEYLOGENOUS_LEUKEMIA_DN	72	0.36341	1.22508	0.232323	0.779101	1	2066	tags=33%, list=19%, signal=41%
PHONG_TNF_RESPONSE_VIA_P38_PARTIAL	99	0.338082	1.22698	0.232704	0.78061	1	2675	tags=36%, list=25%, signal=48%
MISSIAGLIA_REGULATED_BY_METHYLATION_UP	69	0.339353	1.19289	0.234086	0.792547	1	2637	tags=38%, list=24%, signal=49%
CHO_NR4A1_TARGETS	17	0.39902	1.17918	0.234343	0.799507	1	3842	tags=59%, list=35%, signal=91%
KYNG_WERNER_SYNDROM_DN	16	0.40473	1.19728	0.234592	0.792778	1	2627	tags=44%, list=24%, signal=58%
RODWELL_AGING_KIDNEY_UP	276	0.345148	1.26732	0.235174	0.76778	1	2554	tags=37%, list=24%, signal=47%
COLDREN_GEFITINIB_RESISTANCE_DN	132	0.369774	1.27194	0.235294	0.774852	1	2727	tags=42%, list=25%, signal=55%
MUNSHI_MULTIPLE_MYELOMA_UP	42	0.364566	1.21505	0.235546	0.776769	1	3111	tags=43%, list=29%, signal=60%
WHITEFORD_PEDIATRIC_CANCER_MARKERS	75	0.463238	1.32413	0.235741	0.736439	1	3849	tags=64%, list=36%, signal=99%
HAHTOLA_MYCOSIS_FUNGOIDES_SKIN_DN	17	0.435202	1.23122	0.235887	0.780987	1	3052	tags=53%, list=28%, signal=74%
GYORFFY_DOXORUBICIN_RESISTANCE	31	0.370239	1.21992	0.236111	0.774903	1	1848	tags=29%, list=17%, signal=35%
REACTOME_OLFACTORY_SIGNALING_PATHWAY	27	0.365211	1.16967	0.236842	0.798723	1	1651	tags=30%, list=15%, signal=35%
SMID_BREAST_CANCER_BASAL_UP	375	0.261859	1.15623	0.236842	0.801043	1	2574	tags=32%, list=24%, signal=41%
GENTLES_LEUKEMIC_STEM_CELL_UP	15	0.448867	1.22013	0.237219	0.77569	1	1949	tags=47%, list=18%, signal=57%
CERIBELLI_PROMOTERS_INACTIVE_AND_BOUND_BY_NFY	21	0.395183	1.16961	0.238776	0.797678	1	2202	tags=48%, list=20%, signal=60%
LIU_CDX2_TARGETS_UP	17	0.430497	1.21178	0.23913	0.776895	1	1248	tags=35%, list=12%, signal=40%
PID_THROMBIN_PAR1_PATHWAY	29	0.35825	1.20405	0.23913	0.787433	1	3964	tags=52%, list=37%, signal=81%
XU_GH1_AUTOCRINE_TARGETS_UP	132	0.245021	1.12411	0.239604	0.806554	1	1412	tags=20%, list=13%, signal=22%
LEE_AGING_NEOCORTEX_DN	34	0.337717	1.1579	0.241164	0.799875	1	1275	tags=24%, list=12%, signal=27%
BURTON_ADIPOGENESIS_PEAK_AT_2HR	37	0.417685	1.25217	0.241803	0.776092	1	1441	tags=30%, list=13%, signal=34%
ACOSTA_PROLIFERATION_INDEPENDENT_MYC_TARGETS_DN	63	0.326348	1.18027	0.242616	0.799955	1	2633	tags=38%, list=24%, signal=50%
YAO_TEMPORAL_RESPONSE_TO_PROGESTERONE_CLUSTER_7	40	0.312434	1.17562	0.242915	0.798746	1	2887	tags=45%, list=27%, signal=61%
MARTINEZ_RB1_TARGETS_UP	391	0.220357	1.10319	0.242915	0.81087	1	3133	tags=32%, list=29%, signal=44%
GREENBAUM_E2A_TARGETS_UP	24	0.506297	1.29039	0.243295	0.761309	1	4017	tags=75%, list=37%, signal=119%
ROVERSI_GLIOMA_LOH_REGIONS	28	0.37525	1.21352	0.243354	0.777184	1	1688	tags=32%, list=16%, signal=38%
PURBEY_TARGETS_OF_CTBP1_NOT_SATB1_DN	257	0.218438	1.10111	0.244048	0.807365	1	2122	tags=24%, list=20%, signal=29%
VERHAAK_AML_WITH_NPM1_MUTATED_DN	132	0.292003	1.17428	0.244094	0.800178	1	2098	tags=30%, list=19%, signal=36%
GRAHAM_NORMAL_QUIESCENT_VS_NORMAL_DIVIDING_UP	38	0.351545	1.16899	0.244353	0.798223	1	2370	tags=37%, list=22%, signal=47%
JECHLINGER_EPITHELIAL_TO_MESENCHYMAL_TRANSITION_DN	41	0.370153	1.20478	0.244489	0.78793	1	4372	tags=61%, list=40%, signal=102%
PEDERSEN_TARGETS_OF_611CTF_ISOFORM_OF_ERBB2	43	0.358965	1.19563	0.245361	0.79378	1	3021	tags=47%, list=28%, signal=64%
FISCHER_G2_M_CELL_CYCLE	135	0.372624	1.24025	0.245648	0.783343	1	3871	tags=56%, list=36%, signal=87%
LE_EGR2_TARGETS_UP	69	0.381523	1.26529	0.246124	0.76951	1	3849	tags=55%, list=36%, signal=85%
VERHAAK_AML_WITH_NPM1_MUTATED_UP	102	0.341684	1.20791	0.246888	0.782879	1	3492	tags=49%, list=32%, signal=72%
BIOCARTA_PYK2_PATHWAY	18	0.366102	1.16533	0.246939	0.796608	1	2606	tags=33%, list=24%, signal=44%
VANDESLUIS_COMMD1_TARGETS_GROUP_3_UP	55	0.342381	1.19872	0.247845	0.791403	1	2784	tags=40%, list=26%, signal=54%
KEGG_DILATED_CARDIOMYOPATHY	54	0.355054	1.19047	0.247934	0.792156	1	2651	tags=33%, list=24%, signal=44%
CHIARETTI_ACUTE_LYMPHOBLASTIC_LEUKEMIA_ZAP70	29	0.337237	1.17171	0.248485	0.801469	1	2226	tags=31%, list=21%, signal=39%
NELSON_RESPONSE_TO_ANDROGEN_UP	55	0.309517	1.15282	0.250509	0.801276	1	3292	tags=40%, list=30%, signal=57%
BIOCARTA_FMLP_PATHWAY	26	0.352451	1.15238	0.251037	0.800174	1	3289	tags=31%, list=30%, signal=44%
DIRMEIER_LMP1_RESPONSE_LATE_UP	30	0.403915	1.2409	0.251064	0.784413	1	1512	tags=33%, list=14%, signal=39%
REACTOME_INTEGRIN_CELL_SURFACE_INTERACTIONS	45	0.367081	1.18663	0.251451	0.79181	1	2661	tags=31%, list=25%, signal=41%
IIZUKA_LIVER_CANCER_PROGRESSION_L1_G1_UP	16	0.439263	1.19381	0.251474	0.795098	1	3820	tags=69%, list=35%, signal=106%
LEE_LIVER_CANCER_DENA_UP	30	0.356844	1.16845	0.251572	0.794961	1	2578	tags=43%, list=24%, signal=57%
BROWNE_HCMV_INFECTION_12HR_UP	68	0.280658	1.14319	0.251908	0.800222	1	2310	tags=26%, list=21%, signal=33%
HERNANDEZ_MITOTIC_ARREST_BY_DOCETAXEL_1_UP	22	0.353884	1.16722	0.252083	0.794818	1	3662	tags=64%, list=34%, signal=96%
MARSHALL_VIRAL_INFECTION_RESPONSE_DN	19	0.478311	1.25438	0.252174	0.780205	1	2252	tags=53%, list=21%, signal=66%
RIGGINS_TAMOXIFEN_RESISTANCE_DN	134	0.323599	1.19537	0.252427	0.793219	1	1622	tags=25%, list=15%, signal=29%
KUMAR_PATHOGEN_LOAD_BY_MACROPHAGES	148	0.223593	1.10034	0.252427	0.807499	1	2607	tags=30%, list=24%, signal=39%
REACTOME_REGULATION_OF_BETA_CELL_DEVELOPMENT	19	0.392869	1.18935	0.252918	0.792763	1	2177	tags=42%, list=20%, signal=53%
ZHOU_CELL_CYCLE_GENES_IN_IR_RESPONSE_24HR	73	0.439247	1.27188	0.253438	0.773347	1	3650	tags=60%, list=34%, signal=90%
KIM_WT1_TARGETS_8HR_UP	99	0.272668	1.1321	0.253579	0.802636	1	2250	tags=26%, list=21%, signal=33%
RUTELLA_RESPONSE_TO_HGF_UP	228	0.271412	1.14711	0.254167	0.801373	1	2343	tags=29%, list=22%, signal=37%
WANG_NFKB_TARGETS	16	0.50649	1.17795	0.25523	0.800657	1	1378	tags=44%, list=13%, signal=50%
BURTON_ADIPOGENESIS_3	68	0.450113	1.31037	0.255319	0.74696	1	3503	tags=53%, list=32%, signal=78%
REACTOME_INTERFERON_SIGNALING	79	0.376414	1.25665	0.255533	0.779577	1	3204	tags=41%, list=30%, signal=57%
KEGG_PROGESTERONE_MEDIATED_OOCYTE_MATURATION	51	0.300748	1.16329	0.256098	0.797694	1	2607	tags=35%, list=24%, signal=46%
SASSON_RESPONSE_TO_GONADOTROPHINS_DN	51	0.312578	1.16862	0.256148	0.79689	1	3289	tags=43%, list=30%, signal=62%
ALONSO_METASTASIS_EMT_UP	19	0.397868	1.18273	0.256262	0.797837	1	1237	tags=21%, list=11%, signal=24%
REACTOME_MEIOTIC_RECOMBINATION	46	0.397789	1.2309	0.256513	0.780519	1	4304	tags=63%, list=40%, signal=104%
MARTENS_TRETINOIN_RESPONSE_UP	418	0.291596	1.1505	0.257143	0.803156	1	1944	tags=27%, list=18%, signal=32%
LAU_APOPTOSIS_CDKN2A_UP	36	0.311864	1.1428	0.257384	0.796876	1	1078	tags=22%, list=10%, signal=25%
PID_IL12_STAT4_PATHWAY	18	0.486641	1.24679	0.257669	0.773969	1	1175	tags=39%, list=11%, signal=44%
HAHTOLA_SEZARY_SYNDROM_UP	56	0.30121	1.15029	0.258964	0.801444	1	1683	tags=25%, list=16%, signal=29%
HOFMANN_CELL_LYMPHOMA_UP	26	0.355752	1.17703	0.259259	0.799515	1	1731	tags=31%, list=16%, signal=37%
WILENSKY_RESPONSE_TO_DARAPLADIB	20	0.559312	1.28701	0.260081	0.763183	1	3304	tags=70%, list=31%, signal=101%
SHETH_LIVER_CANCER_VS_TXNIP_LOSS_PAM5	52	0.297766	1.14408	0.260355	0.79884	1	1555	tags=29%, list=14%, signal=34%
RASHI_RESPONSE_TO_IONIZING_RADIATION_2	80	0.326815	1.17599	0.260417	0.800129	1	2802	tags=40%, list=26%, signal=54%
PID_EPO_PATHWAY	16	0.42534	1.20239	0.260956	0.787023	1	2713	tags=63%, list=25%, signal=83%
OHGUCHI_LIVER_HNF4A_TARGETS_UP	27	0.357662	1.1491	0.262097	0.802633	1	2136	tags=37%, list=20%, signal=46%
BROWNE_HCMV_INFECTION_30MIN_UP	33	0.361565	1.16122	0.262156	0.79775	1	2234	tags=30%, list=21%, signal=38%
PID_CMYB_PATHWAY	54	0.306431	1.14583	0.262195	0.799448	1	2300	tags=30%, list=21%, signal=37%
BIOCARTA_MAPK_PATHWAY	59	0.311618	1.16723	0.2625	0.795958	1	1751	tags=25%, list=16%, signal=30%
LIU_CMYB_TARGETS_UP	99	0.261144	1.11896	0.262712	0.807054	1	2912	tags=33%, list=27%, signal=45%
ELVIDGE_HIF1A_TARGETS_DN	53	0.350111	1.17791	0.262931	0.799522	1	2608	tags=42%, list=24%, signal=54%
MCMURRAY_TP53_HRAS_COOPERATION_RESPONSE_UP	18	0.425588	1.18215	0.26294	0.79698	1	2578	tags=50%, list=24%, signal=66%
REACTOME_NUCLEAR_SIGNALING_BY_ERBB4	20	0.384406	1.14871	0.26506	0.80151	1	3390	tags=60%, list=31%, signal=87%
PID_PLK1_PATHWAY	24	0.398249	1.17107	0.265774	0.799568	1	3555	tags=54%, list=33%, signal=80%
YAGI_AML_WITH_11Q23_REARRANGED	201	0.221877	1.08701	0.266	0.817291	1	2847	tags=30%, list=26%, signal=40%
REICHERT_MITOSIS_LIN9_TARGETS	15	0.528919	1.24179	0.266798	0.783235	1	4132	tags=67%, list=38%, signal=108%
VALK_AML_CLUSTER_3	17	0.39268	1.15541	0.266802	0.80003	1	964	tags=24%, list=9%, signal=26%
REACTOME_LIPID_DIGESTION_MOBILIZATION_AND_TRANSPORT	27	0.360096	1.15618	0.26694	0.800004	1	1995	tags=33%, list=18%, signal=41%
PID_AR_NONGENOMIC_PATHWAY	19	0.364262	1.15098	0.26694	0.80303	1	2713	tags=37%, list=25%, signal=49%
REACTOME_INTEGRIN_ALPHAIIB_BETA3_SIGNALING	16	0.451473	1.17639	0.267191	0.800173	1	1510	tags=25%, list=14%, signal=29%
KEGG_ARRHYTHMOGENIC_RIGHT_VENTRICULAR_CARDIOMYOPATHY_ARVC	46	0.329987	1.15238	0.268293	0.80132	1	1953	tags=24%, list=18%, signal=29%
HOWLIN_PUBERTAL_MAMMARY_GLAND	37	0.333649	1.1234	0.26945	0.803266	1	1969	tags=35%, list=18%, signal=43%
PEDERSEN_METASTASIS_BY_ERBB2_ISOFORM_4	57	0.311669	1.14187	0.269777	0.797244	1	2816	tags=33%, list=26%, signal=45%
TRACEY_RESISTANCE_TO_IFNA2_DN	22	0.37033	1.1802	0.271222	0.798879	1	2949	tags=50%, list=27%, signal=69%
JOSEPH_RESPONSE_TO_SODIUM_BUTYRATE_UP	20	0.416857	1.18209	0.271335	0.795906	1	2010	tags=35%, list=19%, signal=43%
ONDER_CDH1_TARGETS_3_DN	36	0.474564	1.2308	0.271429	0.779397	1	3033	tags=56%, list=28%, signal=77%
MATZUK_MALE_REPRODUCTION_SERTOLI	18	0.397075	1.17094	0.271484	0.798698	1	3440	tags=56%, list=32%, signal=81%
REACTOME_NUCLEOTIDE_BINDING_DOMAIN_LEUCINE_RICH_REPEAT_CONTAINING_RECEPTOR_NLR_SIGNALING_PATHWAYS	25	0.367992	1.1802	0.271579	0.79763	1	2886	tags=44%, list=27%, signal=60%
GENTILE_UV_HIGH_DOSE_DN	163	0.305231	1.1883	0.271654	0.792018	1	2907	tags=34%, list=27%, signal=46%
PID_NEPHRIN_NEPH1_PATHWAY	15	0.38582	1.14696	0.272358	0.799534	1	3926	tags=53%, list=36%, signal=84%
KEGG_TOLL_LIKE_RECEPTOR_SIGNALING_PATHWAY	51	0.348819	1.18438	0.272727	0.795675	1	2607	tags=39%, list=24%, signal=51%
CADWELL_ATG16L1_TARGETS_DN	44	0.304364	1.12529	0.272917	0.807673	1	4212	tags=48%, list=39%, signal=78%
HOFFMANN_LARGE_TO_SMALL_PRE_BII_LYMPHOCYTE_UP	101	0.377274	1.2166	0.273267	0.779216	1	3277	tags=42%, list=30%, signal=59%
WU_SILENCED_BY_METHYLATION_IN_BLADDER_CANCER	30	0.354826	1.14909	0.273642	0.801515	1	2608	tags=37%, list=24%, signal=48%
LY_AGING_PREMATURE_DN	21	0.443974	1.2104	0.274131	0.778158	1	3786	tags=62%, list=35%, signal=95%
BOYLAN_MULTIPLE_MYELOMA_D_DN	43	0.298313	1.1285	0.274319	0.805129	1	3223	tags=44%, list=30%, signal=63%
RUTELLA_RESPONSE_TO_HGF_VS_CSF2RB_AND_IL4_UP	231	0.277804	1.14037	0.27459	0.797052	1	2328	tags=28%, list=21%, signal=35%
REACTOME_GPVI_MEDIATED_ACTIVATION_CASCADE	21	0.44751	1.20774	0.275	0.781995	1	2713	tags=48%, list=25%, signal=63%
MODY_HIPPOCAMPUS_NEONATAL	21	0.393403	1.17157	0.275794	0.800649	1	1910	tags=29%, list=18%, signal=35%
SENESE_HDAC1_TARGETS_UP	253	0.307207	1.17333	0.275862	0.801782	1	3440	tags=40%, list=32%, signal=58%
PETROVA_ENDOTHELIUM_LYMPHATIC_VS_BLOOD_DN	96	0.317111	1.15493	0.276008	0.799021	1	3621	tags=47%, list=33%, signal=70%
WIERENGA_STAT5A_TARGETS_DN	112	0.297306	1.14978	0.277662	0.801812	1	3463	tags=45%, list=32%, signal=65%
GAVIN_FOXP3_TARGETS_CLUSTER_P4	60	0.294193	1.12808	0.277778	0.804169	1	2388	tags=35%, list=22%, signal=45%
ENGELMANN_CANCER_PROGENITORS_UP	36	0.302329	1.12904	0.278226	0.804783	1	1261	tags=19%, list=12%, signal=22%
ICHIBA_GRAFT_VERSUS_HOST_DISEASE_D7_DN	17	0.416073	1.16725	0.278884	0.797116	1	2470	tags=47%, list=23%, signal=61%
ODONNELL_TFRC_TARGETS_DN	79	0.365775	1.19974	0.278978	0.790947	1	2375	tags=34%, list=22%, signal=43%
ASGHARZADEH_NEUROBLASTOMA_POOR_SURVIVAL_DN	20	0.386004	1.15788	0.280156	0.798746	1	746	tags=20%, list=7%, signal=21%
EBAUER_TARGETS_OF_PAX3_FOXO1_FUSION_DN	25	0.347038	1.14036	0.280488	0.795978	1	1559	tags=20%, list=14%, signal=23%
KRIEG_HYPOXIA_NOT_VIA_KDM3A	415	0.227743	1.10345	0.280808	0.811163	1	3437	tags=38%, list=32%, signal=54%
ALCALAY_AML_BY_NPM1_LOCALIZATION_DN	111	0.284801	1.16026	0.281376	0.797986	1	2404	tags=30%, list=22%, signal=38%
PENG_RAPAMYCIN_RESPONSE_UP	107	0.299872	1.16608	0.281837	0.796997	1	2556	tags=35%, list=24%, signal=45%
REACTOME_SIGNALING_BY_THE_B_CELL_RECEPTOR_BCR	72	0.340151	1.16317	0.282937	0.796826	1	2819	tags=38%, list=26%, signal=50%
WANG_IMMORTALIZED_BY_HOXA9_AND_MEIS1_DN	16	0.508011	1.21566	0.283298	0.777687	1	1963	tags=38%, list=18%, signal=46%
KEGG_MAPK_SIGNALING_PATHWAY	160	0.249427	1.11037	0.283644	0.809516	1	1762	tags=21%, list=16%, signal=24%
LIM_MAMMARY_LUMINAL_PROGENITOR_UP	31	0.381019	1.1431	0.28373	0.798279	1	3822	tags=58%, list=35%, signal=89%
ZHOU_INFLAMMATORY_RESPONSE_FIMA_UP	276	0.227859	1.09187	0.284351	0.816723	1	1868	tags=21%, list=17%, signal=25%
ZHANG_TLX_TARGETS_60HR_DN	153	0.39048	1.23921	0.284895	0.781982	1	3451	tags=47%, list=32%, signal=68%
AZARE_NEOPLASTIC_TRANSFORMATION_BY_STAT3_UP	79	0.32253	1.1453	0.285141	0.79878	1	2997	tags=37%, list=28%, signal=50%
CHIANG_LIVER_CANCER_SUBCLASS_INTERFERON_UP	15	0.429066	1.1485	0.285149	0.799828	1	1934	tags=40%, list=18%, signal=49%
BERENJENO_TRANSFORMED_BY_RHOA_UP	320	0.296175	1.16361	0.285429	0.797938	1	3503	tags=41%, list=32%, signal=59%
KYNG_DNA_DAMAGE_BY_4NQO_OR_UV	38	0.30145	1.13938	0.285714	0.794315	1	2974	tags=39%, list=27%, signal=54%
DASU_IL6_SIGNALING_SCAR_UP	15	0.417406	1.15417	0.286585	0.798845	1	1648	tags=33%, list=15%, signal=39%
MMS_MOUSE_LYMPH_HIGH_4HRS_UP	18	0.398358	1.14622	0.286869	0.799495	1	480	tags=22%, list=4%, signal=23%
WANG_CISPLATIN_RESPONSE_AND_XPC_DN	135	0.258757	1.12507	0.286869	0.807164	1	2432	tags=29%, list=22%, signal=37%
SENESE_HDAC2_TARGETS_UP	64	0.341036	1.16431	0.286902	0.798338	1	3468	tags=50%, list=32%, signal=73%
KIM_WT1_TARGETS_UP	132	0.2733	1.12332	0.287474	0.802455	1	3514	tags=43%, list=32%, signal=63%
PID_RHOA_PATHWAY	29	0.323372	1.13571	0.287785	0.801318	1	3690	tags=52%, list=34%, signal=78%
INGRAM_SHH_TARGETS_DN	33	0.343044	1.12933	0.288421	0.805103	1	2833	tags=39%, list=26%, signal=53%
BASAKI_YBX1_TARGETS_UP	168	0.319596	1.17147	0.288577	0.799737	1	3035	tags=40%, list=28%, signal=55%
CHANG_CORE_SERUM_RESPONSE_UP	127	0.316976	1.16853	0.288618	0.79594	1	3404	tags=39%, list=31%, signal=57%
ST_GA12_PATHWAY	15	0.412604	1.16164	0.289528	0.798983	1	2366	tags=40%, list=22%, signal=51%
MCBRYAN_PUBERTAL_BREAST_5_6WK_UP	74	0.282995	1.11012	0.290514	0.809172	1	1891	tags=27%, list=17%, signal=33%
NADERI_BREAST_CANCER_PROGNOSIS_UP	24	0.399929	1.17241	0.290766	0.801938	1	4412	tags=67%, list=41%, signal=112%
ZHU_CMV_ALL_UP	66	0.310976	1.13074	0.291845	0.80221	1	3591	tags=42%, list=33%, signal=63%
KOHOUTEK_CCNT2_TARGETS	34	0.314354	1.10425	0.293279	0.814939	1	1818	tags=29%, list=17%, signal=35%
IGLESIAS_E2F_TARGETS_UP	87	0.306121	1.1383	0.293774	0.79511	1	2387	tags=30%, list=22%, signal=38%
ENK_UV_RESPONSE_EPIDERMIS_UP	164	0.284037	1.15045	0.294606	0.802163	1	2283	tags=29%, list=21%, signal=36%
LEE_LIVER_CANCER_CIPROFIBRATE_DN	41	0.336612	1.12468	0.295019	0.807106	1	2302	tags=34%, list=21%, signal=43%
SHAFFER_IRF4_MULTIPLE_MYELOMA_PROGRAM	20	0.402904	1.17568	0.296	0.799844	1	3136	tags=55%, list=29%, signal=77%
WU_CELL_MIGRATION	104	0.348088	1.18218	0.296681	0.798171	1	2105	tags=33%, list=19%, signal=40%
LEE_DOUBLE_POLAR_THYMOCYTE	15	0.386963	1.13157	0.29697	0.80201	1	1991	tags=33%, list=18%, signal=41%
MARTINEZ_TP53_TARGETS_UP	354	0.227206	1.08745	0.297131	0.81797	1	3099	tags=34%, list=29%, signal=46%
MORI_PLASMA_CELL_DN	23	0.444642	1.1927	0.29718	0.791846	1	2283	tags=48%, list=21%, signal=60%
QI_HYPOXIA_TARGETS_OF_HIF1A_AND_FOXA2	22	0.381576	1.14004	0.297405	0.793575	1	1766	tags=32%, list=16%, signal=38%
CROMER_METASTASIS_UP	46	0.315324	1.12397	0.298279	0.805917	1	2951	tags=43%, list=27%, signal=60%
NADLER_HYPERGLYCEMIA_AT_OBESITY	44	0.293393	1.1113	0.29899	0.811175	1	1152	tags=20%, list=11%, signal=23%
KOBAYASHI_EGFR_SIGNALING_24HR_DN	147	0.398219	1.22493	0.299228	0.77674	1	3503	tags=50%, list=32%, signal=73%
CHICAS_RB1_TARGETS_SENESCENT	315	0.265951	1.12414	0.300199	0.807518	1	2387	tags=27%, list=22%, signal=34%
GRAHAM_CML_QUIESCENT_VS_NORMAL_DIVIDING_UP	35	0.332246	1.09759	0.30042	0.809924	1	2683	tags=37%, list=25%, signal=49%
WUNDER_INFLAMMATORY_RESPONSE_AND_CHOLESTEROL_UP	32	0.432581	1.18636	0.301229	0.791314	1	2729	tags=50%, list=25%, signal=67%
MIKKELSEN_MEF_HCP_WITH_H3K27ME3	296	0.263635	1.10135	0.301229	0.807734	1	2326	tags=30%, list=21%, signal=38%
BOQUEST_STEM_CELL_DN	121	0.297095	1.12247	0.301255	0.802739	1	1982	tags=28%, list=18%, signal=34%
MOLENAAR_TARGETS_OF_CCND1_AND_CDK4_DN	26	0.471321	1.22832	0.301527	0.779385	1	3371	tags=46%, list=31%, signal=67%
KEGG_RIG_I_LIKE_RECEPTOR_SIGNALING_PATHWAY	35	0.323524	1.12364	0.301887	0.804668	1	2499	tags=37%, list=23%, signal=48%
HOSHIDA_LIVER_CANCER_SUBCLASS_S1	138	0.311597	1.14774	0.302469	0.800731	1	2707	tags=36%, list=25%, signal=47%
HAHTOLA_MYCOSIS_FUNGOIDES_CD4_DN	61	0.312799	1.12239	0.303901	0.801944	1	3580	tags=49%, list=33%, signal=73%
CHUNG_BLISTER_CYTOTOXICITY_DN	25	0.34195	1.12353	0.304432	0.803932	1	1619	tags=28%, list=15%, signal=33%
SHAFFER_IRF4_TARGETS_IN_PLASMA_CELL_VS_MATURE_B_LYMPHOCYTE	40	0.328223	1.14171	0.30444	0.796607	1	3402	tags=48%, list=31%, signal=69%
SASAKI_ADULT_T_CELL_LEUKEMIA	101	0.257679	1.0963	0.304519	0.809735	1	3600	tags=42%, list=33%, signal=62%
MARTINEZ_RB1_AND_TP53_TARGETS_UP	352	0.225892	1.08357	0.305499	0.817908	1	2228	tags=24%, list=21%, signal=30%
SWEET_LUNG_CANCER_KRAS_DN	251	0.268565	1.1042	0.305556	0.814068	1	3230	tags=38%, list=30%, signal=53%
REACTOME_P75_NTR_RECEPTOR_MEDIATED_SIGNALLING	41	0.305995	1.11844	0.305609	0.8064	1	2799	tags=37%, list=26%, signal=49%
HALMOS_CEBPA_TARGETS_UP	25	0.390777	1.13445	0.305668	0.802635	1	2253	tags=36%, list=21%, signal=45%
MEISSNER_BRAIN_HCP_WITH_H3K4ME2_AND_H3K27ME3	35	0.337844	1.1064	0.305857	0.812084	1	2489	tags=34%, list=23%, signal=44%
PAPASPYRIDONOS_UNSTABLE_ATEROSCLEROTIC_PLAQUE_UP	32	0.397443	1.14859	0.30608	0.800715	1	2710	tags=41%, list=25%, signal=54%
SMIRNOV_CIRCULATING_ENDOTHELIOCYTES_IN_CANCER_UP	96	0.306254	1.13326	0.306452	0.802658	1	2677	tags=36%, list=25%, signal=48%
REACTOME_MEIOSIS	62	0.332851	1.14213	0.306911	0.79767	1	2768	tags=39%, list=26%, signal=52%
TAYLOR_METHYLATED_IN_ACUTE_LYMPHOBLASTIC_LEUKEMIA	47	0.306715	1.11127	0.307393	0.810209	1	1022	tags=19%, list=9%, signal=21%
HAN_JNK_SINGALING_UP	23	0.374529	1.11818	0.30754	0.806074	1	2484	tags=39%, list=23%, signal=51%
FERRANDO_T_ALL_WITH_MLL_ENL_FUSION_UP	42	0.320734	1.12006	0.308151	0.805154	1	1412	tags=21%, list=13%, signal=25%
PID_S1P_S1P3_PATHWAY	15	0.408421	1.16222	0.3083	0.798504	1	2034	tags=27%, list=19%, signal=33%
SASSON_RESPONSE_TO_FORSKOLIN_DN	49	0.302429	1.11264	0.308468	0.814798	1	3289	tags=43%, list=30%, signal=61%
MUELLER_COMMON_TARGETS_OF_AML_FUSIONS_DN	20	0.34859	1.10413	0.308617	0.813245	1	1069	tags=20%, list=10%, signal=22%
ST_FAS_SIGNALING_PATHWAY	31	0.310532	1.11416	0.309322	0.812813	1	2610	tags=39%, list=24%, signal=51%
DELYS_THYROID_CANCER_DN	136	0.277135	1.0992	0.31	0.808522	1	2098	tags=26%, list=19%, signal=32%
WANG_RESPONSE_TO_GSK3_INHIBITOR_SB216763_DN	203	0.281041	1.10377	0.310484	0.812306	1	3410	tags=39%, list=31%, signal=56%
DORN_ADENOVIRUS_INFECTION_48HR_DN	28	0.348581	1.11388	0.310621	0.812621	1	3662	tags=57%, list=34%, signal=86%
MEISSNER_NPC_HCP_WITH_H3K4ME2_AND_H3K27ME3	184	0.261522	1.07948	0.310811	0.821985	1	2560	tags=31%, list=24%, signal=40%
NAKAMURA_CANCER_MICROENVIRONMENT_DN	33	0.380989	1.14111	0.311245	0.797238	1	4228	tags=64%, list=39%, signal=104%
PID_TRKR_PATHWAY	32	0.306487	1.09656	0.3125	0.809922	1	3156	tags=50%, list=29%, signal=70%
PID_IL4_2PATHWAY	30	0.356048	1.12534	0.312749	0.808587	1	2793	tags=37%, list=26%, signal=49%
AMIT_SERUM_RESPONSE_480_MCF10A	19	0.465116	1.15684	0.313402	0.800577	1	1323	tags=32%, list=12%, signal=36%
OKAWA_NEUROBLASTOMA_1P36_31_DELETION	16	0.448359	1.15428	0.313466	0.799698	1	980	tags=25%, list=9%, signal=27%
MOOTHA_GLUCONEOGENESIS	22	0.384348	1.12597	0.314534	0.807984	1	2323	tags=41%, list=21%, signal=52%
MIKKELSEN_NPC_HCP_WITH_H3K27ME3	180	0.26705	1.09502	0.314741	0.811163	1	2641	tags=33%, list=24%, signal=43%
REACTOME_NEGATIVE_REGULATORS_OF_RIG_I_MDA5_SIGNALING	24	0.365293	1.12646	0.315011	0.807691	1	3450	tags=46%, list=32%, signal=67%
BROWNE_HCMV_INFECTION_1HR_UP	35	0.302787	1.10209	0.315068	0.808789	1	2951	tags=37%, list=27%, signal=51%
SERVITJA_LIVER_HNF1A_TARGETS_UP	87	0.254258	1.07847	0.315261	0.820973	1	1785	tags=28%, list=16%, signal=33%
BAKKER_FOXO3_TARGETS_UP	40	0.289833	1.0945	0.316	0.811594	1	2224	tags=35%, list=21%, signal=44%
FIGUEROA_AML_METHYLATION_CLUSTER_5_DN	20	0.362827	1.11056	0.316129	0.811075	1	1143	tags=25%, list=11%, signal=28%
PURBEY_TARGETS_OF_CTBP1_AND_SATB1_UP	52	0.298667	1.10645	0.317125	0.812971	1	2125	tags=25%, list=20%, signal=31%
ZHENG_IL22_SIGNALING_UP	35	0.372809	1.14547	0.317427	0.799396	1	1868	tags=37%, list=17%, signal=45%
WIKMAN_ASBESTOS_LUNG_CANCER_DN	16	0.382271	1.14033	0.317647	0.79497	1	2385	tags=38%, list=22%, signal=48%
SCHOEN_NFKB_SIGNALING	21	0.430298	1.14282	0.317719	0.797917	1	408	tags=19%, list=4%, signal=20%
SAMOLS_TARGETS_OF_KHSV_MIRNAS_DN	33	0.326525	1.09048	0.318091	0.817491	1	1730	tags=30%, list=16%, signal=36%
DUTERTRE_ESTRADIOL_RESPONSE_24HR_UP	187	0.358064	1.17278	0.318182	0.802141	1	3566	tags=47%, list=33%, signal=69%
JECHLINGER_EPITHELIAL_TO_MESENCHYMAL_TRANSITION_UP	41	0.339843	1.11771	0.318182	0.806322	1	2048	tags=32%, list=19%, signal=39%
WHITE_NEUROBLASTOMA_WITH_1P36.3_DELETION	15	0.449471	1.15877	0.318872	0.798676	1	980	tags=27%, list=9%, signal=29%
RADMACHER_AML_PROGNOSIS	42	0.283887	1.09911	0.319361	0.807801	1	2682	tags=38%, list=25%, signal=50%
PASINI_SUZ12_TARGETS_UP	65	0.257291	1.07538	0.319588	0.820851	1	1379	tags=18%, list=13%, signal=21%
TOMLINS_PROSTATE_CANCER_UP	22	0.340421	1.09966	0.32	0.808331	1	3578	tags=50%, list=33%, signal=75%
AMUNDSON_GAMMA_RADIATION_RESPONSE	32	0.462766	1.20489	0.32008	0.788965	1	4132	tags=72%, list=38%, signal=116%
HUANG_DASATINIB_RESISTANCE_UP	51	0.347884	1.13264	0.320755	0.802244	1	2992	tags=39%, list=28%, signal=54%
HINATA_NFKB_TARGETS_KERATINOCYTE_UP	50	0.373277	1.13551	0.321041	0.800774	1	2484	tags=44%, list=23%, signal=57%
FERREIRA_EWINGS_SARCOMA_UNSTABLE_VS_STABLE_UP	79	0.34732	1.17226	0.322266	0.801146	1	3780	tags=51%, list=35%, signal=77%
JAZAERI_BREAST_CANCER_BRCA1_VS_BRCA2_DN	21	0.344349	1.10401	0.323136	0.812618	1	2604	tags=38%, list=24%, signal=50%
MASSARWEH_RESPONSE_TO_ESTRADIOL	38	0.301721	1.10035	0.323251	0.80845	1	1737	tags=26%, list=16%, signal=31%
TANG_SENESCENCE_TP53_TARGETS_DN	33	0.424971	1.16873	0.323755	0.797768	1	3849	tags=52%, list=36%, signal=80%
THUM_SYSTOLIC_HEART_FAILURE_UP	232	0.268832	1.10476	0.324272	0.815548	1	2226	tags=27%, list=21%, signal=33%
WINZEN_DEGRADED_VIA_KHSRP	66	0.33232	1.10782	0.325203	0.811323	1	1955	tags=27%, list=18%, signal=33%
PID_AVB3_OPN_PATHWAY	18	0.372641	1.11887	0.326044	0.806237	1	2607	tags=39%, list=24%, signal=51%
NAKAMURA_TUMOR_ZONE_PERIPHERAL_VS_CENTRAL_UP	165	0.273973	1.09712	0.327236	0.810245	1	3431	tags=40%, list=32%, signal=58%
REACTOME_RNA_POL_I_PROMOTER_OPENING	35	0.420284	1.16026	0.328063	0.796837	1	3107	tags=46%, list=29%, signal=64%
CHUNG_BLISTER_CYTOTOXICITY_UP	67	0.303095	1.11658	0.328571	0.808324	1	2883	tags=37%, list=27%, signal=51%
BURTON_ADIPOGENESIS_PEAK_AT_24HR	28	0.412813	1.12842	0.328629	0.804305	1	2383	tags=43%, list=22%, signal=55%
AMUNDSON_POOR_SURVIVAL_AFTER_GAMMA_RADIATION_8G	53	0.289349	1.08963	0.32874	0.8159	1	1603	tags=25%, list=15%, signal=29%
ONGUSAHA_TP53_TARGETS	19	0.372337	1.12321	0.329876	0.801743	1	1900	tags=26%, list=18%, signal=32%
CHEN_LVAD_SUPPORT_OF_FAILING_HEART_UP	63	0.317307	1.11005	0.32998	0.807359	1	3051	tags=43%, list=28%, signal=59%
SENESE_HDAC1_AND_HDAC2_TARGETS_UP	123	0.282805	1.08653	0.331933	0.816617	1	2250	tags=30%, list=21%, signal=38%
GARY_CD5_TARGETS_DN	247	0.281126	1.11586	0.332054	0.809263	1	3503	tags=41%, list=32%, signal=59%
CHARAFE_BREAST_CANCER_BASAL_VS_MESENCHYMAL_UP	65	0.444516	1.18753	0.33264	0.791826	1	2761	tags=54%, list=25%, signal=72%
ZHENG_FOXP3_TARGETS_IN_THYMUS_UP	114	0.340239	1.1222	0.334	0.801391	1	2756	tags=39%, list=25%, signal=52%
REN_BOUND_BY_E2F	33	0.408334	1.14686	0.334623	0.798726	1	3532	tags=52%, list=33%, signal=76%
KEGG_LONG_TERM_POTENTIATION	41	0.293597	1.08803	0.334702	0.817397	1	1536	tags=20%, list=14%, signal=23%
RASHI_RESPONSE_TO_IONIZING_RADIATION_6	52	0.309913	1.10301	0.334746	0.810331	1	2541	tags=42%, list=23%, signal=55%
GERY_CEBP_TARGETS	81	0.305027	1.11189	0.335366	0.813683	1	1513	tags=26%, list=14%, signal=30%
BOYLAN_MULTIPLE_MYELOMA_PCA1_UP	59	0.320402	1.09021	0.335366	0.81723	1	2484	tags=41%, list=23%, signal=53%
HATADA_METHYLATED_IN_LUNG_CANCER_DN	19	0.363737	1.08576	0.336016	0.81673	1	3060	tags=58%, list=28%, signal=81%
MULLIGHAN_MLL_SIGNATURE_1_UP	209	0.305866	1.13912	0.336207	0.793909	1	3366	tags=40%, list=31%, signal=57%
KRIGE_RESPONSE_TO_TOSEDOSTAT_24HR_UP	399	0.224856	1.06942	0.337165	0.824228	1	2457	tags=26%, list=23%, signal=32%
LEE_EARLY_T_LYMPHOCYTE_UP	61	0.37623	1.14004	0.337232	0.794652	1	4025	tags=54%, list=37%, signal=86%
ZHENG_GLIOBLASTOMA_PLASTICITY_UP	135	0.26535	1.0803	0.337838	0.821717	1	2208	tags=27%, list=20%, signal=34%
MELLMAN_TUT1_TARGETS_DN	30	0.288414	1.07027	0.337945	0.823799	1	2883	tags=37%, list=27%, signal=50%
BRACHAT_RESPONSE_TO_CAMPTOTHECIN_UP	16	0.367852	1.10161	0.337972	0.809016	1	1379	tags=31%, list=13%, signal=36%
WATANABE_COLON_CANCER_MSI_VS_MSS_DN	40	0.309252	1.0746	0.338235	0.820974	1	2983	tags=45%, list=28%, signal=62%
REACTOME_AMYLOIDS	46	0.360891	1.09879	0.339921	0.807723	1	2753	tags=41%, list=25%, signal=55%
ENK_UV_RESPONSE_EPIDERMIS_DN	300	0.23343	1.06642	0.340862	0.826607	1	2733	tags=29%, list=25%, signal=38%
PID_TRAIL_PATHWAY	15	0.3924	1.11215	0.340956	0.815051	1	2607	tags=40%, list=24%, signal=53%
GRAHAM_NORMAL_QUIESCENT_VS_NORMAL_DIVIDING_DN	58	0.411678	1.16399	0.34127	0.798032	1	3431	tags=50%, list=32%, signal=73%
CHANG_CYCLING_GENES	85	0.388144	1.14041	0.34236	0.798019	1	3566	tags=53%, list=33%, signal=78%
MURATA_VIRULENCE_OF_H_PILORI	15	0.41989	1.10653	0.342437	0.813779	1	1721	tags=27%, list=16%, signal=32%
PHONG_TNF_TARGETS_UP	42	0.396245	1.14316	0.342795	0.799197	1	2150	tags=33%, list=20%, signal=41%
BIOCARTA_RAC1_PATHWAY	15	0.37108	1.0663	0.342799	0.825989	1	2607	tags=40%, list=24%, signal=53%
KANG_DOXORUBICIN_RESISTANCE_UP	30	0.509896	1.20464	0.34308	0.787052	1	4228	tags=77%, list=39%, signal=125%
DARWICHE_PAPILLOMA_RISK_LOW_UP	89	0.269013	1.07965	0.34322	0.822446	1	1785	tags=24%, list=16%, signal=28%
YAO_HOXA10_TARGETS_VIA_PROGESTERONE_UP	48	0.311542	1.07739	0.343313	0.820102	1	2302	tags=31%, list=21%, signal=40%
BOQUEST_STEM_CELL_CULTURED_VS_FRESH_UP	244	0.251635	1.05187	0.343373	0.838937	1	2607	tags=31%, list=24%, signal=40%
TAVOR_CEBPA_TARGETS_UP	30	0.348083	1.10911	0.343558	0.808763	1	2254	tags=40%, list=21%, signal=50%
GAVIN_FOXP3_TARGETS_CLUSTER_P6	44	0.347807	1.10266	0.34375	0.808281	1	2169	tags=32%, list=20%, signal=40%
ZHU_CMV_8_HR_DN	33	0.333017	1.07894	0.344697	0.820643	1	1441	tags=21%, list=13%, signal=24%
GARGALOVIC_RESPONSE_TO_OXIDIZED_PHOSPHOLIPIDS_BLUE_UP	72	0.277664	1.0767	0.344758	0.819209	1	2413	tags=32%, list=22%, signal=41%
GENTILE_UV_RESPONSE_CLUSTER_D8	22	0.346841	1.09143	0.345029	0.816904	1	210	tags=14%, list=2%, signal=14%
ST_P38_MAPK_PATHWAY	23	0.326476	1.07698	0.345188	0.82032	1	1654	tags=26%, list=15%, signal=31%
LIEN_BREAST_CARCINOMA_METAPLASTIC_VS_DUCTAL_UP	51	0.315585	1.08701	0.345679	0.818248	1	2274	tags=29%, list=21%, signal=37%
PUJANA_BRCA2_PCC_NETWORK	241	0.308366	1.121	0.345776	0.8036	1	2383	tags=28%, list=22%, signal=35%
LIANG_HEMATOPOIESIS_STEM_CELL_NUMBER_LARGE_VS_TINY_UP	22	0.331693	1.06594	0.345833	0.825099	1	1548	tags=27%, list=14%, signal=32%
ZWANG_CLASS_2_TRANSIENTLY_INDUCED_BY_EGF	30	0.343861	1.06914	0.346457	0.823199	1	3164	tags=47%, list=29%, signal=66%
LIU_TARGETS_OF_VMYB_VS_CMYB_DN	28	0.346932	1.10151	0.346774	0.808307	1	1893	tags=29%, list=17%, signal=35%
TAKEDA_TARGETS_OF_NUP98_HOXA9_FUSION_10D_UP	117	0.277959	1.08539	0.346899	0.816792	1	2404	tags=28%, list=22%, signal=36%
MAGRANGEAS_MULTIPLE_MYELOMA_IGLL_VS_IGLK_UP	25	0.30235	1.06076	0.347023	0.834867	1	1830	tags=28%, list=17%, signal=34%
DARWICHE_SKIN_TUMOR_PROMOTER_UP	75	0.285718	1.08965	0.348008	0.816828	1	1785	tags=24%, list=16%, signal=29%
PID_HNF3A_PATHWAY	26	0.381861	1.10445	0.348269	0.815372	1	2509	tags=46%, list=23%, signal=60%
BORLAK_LIVER_CANCER_EGF_UP	30	0.346607	1.10273	0.348548	0.809086	1	3611	tags=53%, list=33%, signal=80%
BYSTROEM_CORRELATED_WITH_IL5_UP	32	0.309687	1.08327	0.348548	0.816858	1	2286	tags=28%, list=21%, signal=36%
SENGUPTA_EBNA1_ANTICORRELATED	85	0.340768	1.11144	0.348837	0.812802	1	2502	tags=35%, list=23%, signal=46%
OSWALD_HEMATOPOIETIC_STEM_CELL_IN_COLLAGEN_GEL_UP	138	0.241278	1.05351	0.34898	0.836417	1	3282	tags=36%, list=30%, signal=51%
LEE_LIVER_CANCER_MYC_E2F1_UP	36	0.303034	1.07337	0.34902	0.821299	1	2846	tags=39%, list=26%, signal=53%
BIOCARTA_IL2RB_PATHWAY	18	0.358339	1.08094	0.349076	0.821948	1	2607	tags=39%, list=24%, signal=51%
OSMAN_BLADDER_CANCER_UP	226	0.282495	1.08898	0.349515	0.816652	1	3530	tags=42%, list=33%, signal=61%
KEGG_SMALL_CELL_LUNG_CANCER	44	0.277472	1.04427	0.350195	0.83138	1	2607	tags=34%, list=24%, signal=45%
STAEGE_EWING_FAMILY_TUMOR	19	0.379822	1.1105	0.350305	0.81019	1	2097	tags=37%, list=19%, signal=46%
REACTOME_G_ALPHA1213_SIGNALLING_EVENTS	46	0.301424	1.07262	0.350775	0.822362	1	3095	tags=46%, list=29%, signal=64%
GENTILE_UV_RESPONSE_CLUSTER_D6	18	0.400788	1.10276	0.351145	0.810017	1	1580	tags=39%, list=15%, signal=45%
LINDGREN_BLADDER_CANCER_WITH_LOH_IN_CHR9Q	67	0.375492	1.13287	0.351456	0.802632	1	3588	tags=46%, list=33%, signal=69%
REACTOME_DEGRADATION_OF_THE_EXTRACELLULAR_MATRIX	16	0.398679	1.11008	0.351738	0.808287	1	2040	tags=31%, list=19%, signal=38%
KORKOLA_TERATOMA	25	0.352472	1.06863	0.351738	0.822712	1	1840	tags=28%, list=17%, signal=34%
HOFMANN_MYELODYSPLASTIC_SYNDROM_LOW_RISK_DN	20	0.37468	1.08437	0.352	0.818541	1	3231	tags=60%, list=30%, signal=85%
TAKEDA_TARGETS_OF_NUP98_HOXA9_FUSION_16D_DN	74	0.271778	1.07525	0.352113	0.820272	1	1969	tags=26%, list=18%, signal=31%
BIOCARTA_AT1R_PATHWAY	22	0.331271	1.08078	0.353535	0.821419	1	1124	tags=18%, list=10%, signal=20%
ZHAN_MULTIPLE_MYELOMA_CD1_AND_CD2_UP	34	0.348461	1.09011	0.354709	0.816516	1	2454	tags=35%, list=23%, signal=45%
KONG_E2F3_TARGETS	59	0.400351	1.1239	0.355212	0.805061	1	2383	tags=39%, list=22%, signal=50%
DAZARD_UV_RESPONSE_CLUSTER_G24	19	0.428432	1.1317	0.356998	0.802708	1	2111	tags=42%, list=19%, signal=52%
DELYS_THYROID_CANCER_UP	263	0.259404	1.07796	0.357724	0.820519	1	2437	tags=29%, list=23%, signal=37%
ROSTY_CERVICAL_CANCER_PROLIFERATION_CLUSTER	85	0.448186	1.19259	0.358268	0.790928	1	3849	tags=59%, list=36%, signal=91%
SENESE_HDAC3_TARGETS_UP	285	0.276845	1.08882	0.358268	0.816107	1	3150	tags=36%, list=29%, signal=49%
STAMBOLSKY_RESPONSE_TO_VITAMIN_D3_UP	42	0.301559	1.0705	0.3583	0.824154	1	862	tags=19%, list=8%, signal=21%
PID_FAK_PATHWAY	26	0.342866	1.07934	0.359281	0.821437	1	3463	tags=42%, list=32%, signal=62%
LIEN_BREAST_CARCINOMA_METAPLASTIC	21	0.385526	1.09428	0.359841	0.811173	1	906	tags=19%, list=8%, signal=21%
ZHAN_MULTIPLE_MYELOMA_PR_UP	29	0.504785	1.18666	0.360377	0.792993	1	4025	tags=76%, list=37%, signal=120%
MIKKELSEN_NPC_LCP_WITH_H3K4ME3	26	0.324103	1.08352	0.360947	0.817085	1	552	tags=15%, list=5%, signal=16%
REACTOME_INNATE_IMMUNE_SYSTEM	131	0.261332	1.0503	0.360996	0.838625	1	3465	tags=42%, list=32%, signal=61%
BROWNE_HCMV_INFECTION_1HR_DN	117	0.229864	1.04741	0.361446	0.835462	1	2391	tags=26%, list=22%, signal=33%
BIOCARTA_HER2_PATHWAY	18	0.336701	1.05018	0.364372	0.836238	1	2607	tags=39%, list=24%, signal=51%
GROSS_HYPOXIA_VIA_ELK3_DN	93	0.276292	1.07789	0.364389	0.81977	1	2646	tags=31%, list=24%, signal=41%
MARSON_BOUND_BY_E2F4_UNSTIMULATED	417	0.274604	1.09107	0.364522	0.816886	1	3657	tags=41%, list=34%, signal=60%
PUIFFE_INVASION_INHIBITED_BY_ASCITES_UP	47	0.294481	1.06945	0.365079	0.825069	1	4161	tags=49%, list=38%, signal=79%
SCHLINGEMANN_SKIN_CARCINOGENESIS_TPA_DN	18	0.364573	1.07679	0.365112	0.819897	1	805	tags=22%, list=7%, signal=24%
ABBUD_LIF_SIGNALING_1_UP	29	0.353112	1.0744	0.365702	0.820586	1	2972	tags=45%, list=27%, signal=62%
AIGNER_ZEB1_TARGETS	19	0.459702	1.11208	0.366109	0.814202	1	2658	tags=47%, list=25%, signal=63%
SANA_TNF_SIGNALING_UP	45	0.381714	1.11144	0.366379	0.81383	1	3253	tags=38%, list=30%, signal=54%
LEE_CALORIE_RESTRICTION_MUSCLE_DN	27	0.304539	1.05178	0.36747	0.838299	1	3355	tags=44%, list=31%, signal=64%
ZHOU_INFLAMMATORY_RESPONSE_FIMA_DN	159	0.22302	1.04739	0.368217	0.834618	1	2417	tags=26%, list=22%, signal=34%
PID_P75_NTR_PATHWAY	34	0.285534	1.03633	0.368952	0.832554	1	3682	tags=47%, list=34%, signal=71%
HESS_TARGETS_OF_HOXA9_AND_MEIS1_UP	38	0.307229	1.05513	0.369048	0.83674	1	3483	tags=50%, list=32%, signal=73%
REACTOME_NEUROTRANSMITTER_RECEPTOR_BINDING_AND_DOWNSTREAM_TRANSMISSION_IN_THE_POSTSYNAPTIC_CELL	76	0.251498	1.03928	0.369048	0.833626	1	2606	tags=32%, list=24%, signal=41%
BRUNO_HEMATOPOIESIS	32	0.307674	1.04434	0.369072	0.832059	1	3095	tags=41%, list=29%, signal=57%
DUTERTRE_ESTRADIOL_RESPONSE_6HR_DN	49	0.290529	1.05024	0.369141	0.837879	1	1677	tags=27%, list=15%, signal=31%
BROWNE_HCMV_INFECTION_4HR_DN	139	0.213588	1.03592	0.370062	0.831968	1	1836	tags=19%, list=17%, signal=23%
BIOCARTA_ERK_PATHWAY	17	0.340949	1.05726	0.370143	0.836675	1	1175	tags=29%, list=11%, signal=33%
KIM_LRRC3B_TARGETS	20	0.488585	1.16128	0.370293	0.798732	1	2954	tags=45%, list=27%, signal=62%
MIKKELSEN_ES_HCP_WITH_H3K27ME3	22	0.370496	1.07153	0.371269	0.824237	1	768	tags=27%, list=7%, signal=29%
CROONQUIST_NRAS_SIGNALING_DN	42	0.439941	1.11136	0.371869	0.812042	1	4228	tags=62%, list=39%, signal=101%
TAKEDA_TARGETS_OF_NUP98_HOXA9_FUSION_6HR_UP	38	0.335598	1.08583	0.372047	0.817517	1	1089	tags=21%, list=10%, signal=23%
BIOCARTA_RHO_PATHWAY	17	0.361495	1.06018	0.372549	0.83541	1	2786	tags=35%, list=26%, signal=47%
REACTOME_HOST_INTERACTIONS_OF_HIV_FACTORS	63	0.300325	1.05001	0.372671	0.835777	1	3886	tags=48%, list=36%, signal=74%
SHETH_LIVER_CANCER_VS_TXNIP_LOSS_PAM1	137	0.238134	1.0392	0.372709	0.832984	1	3002	tags=35%, list=28%, signal=48%
GILDEA_METASTASIS	19	0.377277	1.07593	0.372781	0.820278	1	322	tags=16%, list=3%, signal=16%
BROWNE_INTERFERON_RESPONSIVE_GENES	39	0.465674	1.15541	0.372984	0.801168	1	3016	tags=46%, list=28%, signal=64%
KASLER_HDAC7_TARGETS_1_UP	113	0.278101	1.06885	0.373967	0.823009	1	2047	tags=25%, list=19%, signal=30%
BIOCARTA_IL1R_PATHWAY	19	0.343988	1.06485	0.373967	0.82711	1	2366	tags=32%, list=22%, signal=40%
AMIT_EGF_RESPONSE_120_HELA	45	0.308886	1.06682	0.374194	0.826543	1	2062	tags=33%, list=19%, signal=41%
RUIZ_TNC_TARGETS_DN	80	0.308088	1.05941	0.37422	0.835563	1	3573	tags=40%, list=33%, signal=59%
TSENG_ADIPOGENIC_POTENTIAL_UP	16	0.370324	1.07394	0.374477	0.820791	1	2858	tags=44%, list=26%, signal=59%
ONO_AML1_TARGETS_UP	16	0.472959	1.13352	0.375258	0.803006	1	3796	tags=75%, list=35%, signal=115%
HINATA_NFKB_TARGETS_FIBROBLAST_UP	53	0.322836	1.05236	0.375527	0.838574	1	2119	tags=34%, list=20%, signal=42%
IWANAGA_CARCINOGENESIS_BY_KRAS_UP	94	0.246567	1.04793	0.376782	0.834971	1	1479	tags=19%, list=14%, signal=22%
REACTOME_REGULATION_OF_MITOTIC_CELL_CYCLE	46	0.355133	1.0868	0.376812	0.816918	1	3865	tags=52%, list=36%, signal=81%
MCBRYAN_PUBERTAL_BREAST_6_7WK_UP	123	0.247122	1.04726	0.37751	0.834088	1	1406	tags=18%, list=13%, signal=20%
PIONTEK_PKD1_TARGETS_UP	25	0.31471	1.06013	0.377907	0.834596	1	2010	tags=20%, list=19%, signal=25%
CHEN_HOXA5_TARGETS_9HR_UP	130	0.327512	1.07926	0.378168	0.820709	1	2697	tags=35%, list=25%, signal=46%
PID_TNF_PATHWAY	24	0.328279	1.05752	0.378846	0.836918	1	4139	tags=63%, list=38%, signal=101%
SENESE_HDAC2_TARGETS_DN	77	0.303212	1.07817	0.37931	0.820862	1	1073	tags=21%, list=10%, signal=23%
DUAN_PRDM5_TARGETS	49	0.266206	1.03896	0.379518	0.831903	1	2349	tags=37%, list=22%, signal=47%
WANG_BARRETTS_ESOPHAGUS_DN	15	0.470136	1.13362	0.379668	0.803807	1	2773	tags=53%, list=26%, signal=72%
BOSCO_INTERFERON_INDUCED_ANTIVIRAL_MODULE	48	0.388236	1.1037	0.380658	0.811522	1	3376	tags=48%, list=31%, signal=69%
REACTOME_MITOTIC_M_M_G1_PHASES	88	0.308834	1.04663	0.380859	0.834844	1	3865	tags=47%, list=36%, signal=72%
ZWANG_EGF_INTERVAL_DN	113	0.262543	1.05911	0.381148	0.833657	1	3062	tags=33%, list=28%, signal=45%
FULCHER_INFLAMMATORY_RESPONSE_LECTIN_VS_LPS_DN	259	0.264411	1.04249	0.381443	0.833183	1	2710	tags=30%, list=25%, signal=39%
WILCOX_RESPONSE_TO_PROGESTERONE_UP	85	0.296789	1.05643	0.381605	0.835253	1	3871	tags=54%, list=36%, signal=84%
CHEMELLO_SOLEUS_VS_EDL_MYOFIBERS_UP	22	0.404865	1.08379	0.381633	0.818197	1	825	tags=27%, list=8%, signal=29%
ZHAN_MULTIPLE_MYELOMA_LB_UP	30	0.324221	1.07072	0.381779	0.825415	1	2014	tags=27%, list=19%, signal=33%
KEGG_BLADDER_CANCER	21	0.330551	1.05099	0.381857	0.838648	1	1124	tags=24%, list=10%, signal=27%
GRABARCZYK_BCL11B_TARGETS_UP	43	0.295488	1.04522	0.383367	0.832387	1	3559	tags=44%, list=33%, signal=66%
HOLLMANN_APOPTOSIS_VIA_CD40_DN	127	0.216935	1.03357	0.383399	0.830482	1	2886	tags=30%, list=27%, signal=40%
MANTOVANI_NFKB_TARGETS_UP	23	0.32747	1.0572	0.383505	0.835904	1	1772	tags=30%, list=16%, signal=36%
SHEDDEN_LUNG_CANCER_POOR_SURVIVAL_A6	250	0.298634	1.06087	0.383721	0.835535	1	3521	tags=42%, list=33%, signal=61%
UEDA_PERIFERAL_CLOCK	95	0.235344	1.03018	0.385069	0.834717	1	2516	tags=27%, list=23%, signal=35%
KYNG_NORMAL_AGING_DN	17	0.349126	1.04959	0.38523	0.835091	1	2627	tags=35%, list=24%, signal=47%
REACTOME_CELL_CELL_COMMUNICATION	66	0.268793	1.04033	0.385375	0.832681	1	2414	tags=26%, list=22%, signal=33%
CADWELL_ATG16L1_TARGETS_UP	55	0.291312	1.038	0.385396	0.830884	1	1416	tags=20%, list=13%, signal=23%
SANA_RESPONSE_TO_IFNG_UP	46	0.451178	1.14524	0.385417	0.797843	1	2742	tags=41%, list=25%, signal=55%
GHANDHI_DIRECT_IRRADIATION_UP	63	0.327122	1.06288	0.385621	0.831253	1	2328	tags=37%, list=21%, signal=46%
KIM_WT1_TARGETS_DN	253	0.24587	1.0419	0.385965	0.832976	1	3395	tags=36%, list=31%, signal=51%
HERNANDEZ_MITOTIC_ARREST_BY_DOCETAXEL_2_UP	38	0.281935	1.04587	0.387674	0.833315	1	3776	tags=53%, list=35%, signal=81%
KOYAMA_SEMA3B_TARGETS_UP	168	0.241837	1.02929	0.389002	0.836085	1	2875	tags=35%, list=27%, signal=46%
KEGG_PATHWAYS_IN_CANCER	176	0.234874	1.03986	0.389583	0.833004	1	2713	tags=30%, list=25%, signal=40%
MORI_IMMATURE_B_LYMPHOCYTE_DN	64	0.369367	1.06624	0.390716	0.825258	1	3111	tags=39%, list=29%, signal=54%
KEGG_PATHOGENIC_ESCHERICHIA_COLI_INFECTION	31	0.322284	1.05668	0.390756	0.835472	1	4468	tags=68%, list=41%, signal=115%
RICKMAN_HEAD_AND_NECK_CANCER_F	33	0.40638	1.05927	0.390946	0.834149	1	1469	tags=33%, list=14%, signal=38%
BANDRES_RESPONSE_TO_CARMUSTIN_WITHOUT_MGMT_48HR_DN	15	0.389077	1.05631	0.39112	0.834633	1	2651	tags=40%, list=24%, signal=53%
PID_ECADHERIN_STABILIZATION_PATHWAY	25	0.309621	1.0254	0.392116	0.841557	1	1576	tags=24%, list=15%, signal=28%
MARIADASON_RESPONSE_TO_CURCUMIN_SULINDAC_5	15	0.3845	1.07054	0.392324	0.824961	1	2030	tags=47%, list=19%, signal=57%
BIOCARTA_GSK3_PATHWAY	20	0.329635	1.0412	0.392593	0.833083	1	1085	tags=10%, list=10%, signal=11%
STEIN_ESR1_TARGETS	49	0.286254	1.04957	0.393281	0.834256	1	2799	tags=31%, list=26%, signal=41%
REACTOME_SIGNALLING_TO_RAS	18	0.34695	1.05022	0.394737	0.837022	1	1124	tags=22%, list=10%, signal=25%
HEIDENBLAD_AMPLICON_12P11_12_UP	16	0.360239	1.05678	0.395112	0.836119	1	2430	tags=31%, list=22%, signal=40%
CROONQUIST_NRAS_SIGNALING_UP	23	0.363364	1.05357	0.395918	0.837176	1	3337	tags=52%, list=31%, signal=75%
GAVIN_FOXP3_TARGETS_CLUSTER_P7	49	0.271933	1.03507	0.396341	0.831604	1	1350	tags=20%, list=12%, signal=23%
FRASOR_RESPONSE_TO_SERM_OR_FULVESTRANT_DN	31	0.377832	1.06937	0.396825	0.823454	1	2383	tags=35%, list=22%, signal=45%
BYSTRYKH_HEMATOPOIESIS_STEM_CELL_QTL_CIS	69	0.242905	1.02828	0.397119	0.836827	1	814	tags=13%, list=8%, signal=14%
ZHANG_TLX_TARGETS_DN	52	0.440001	1.13111	0.39726	0.802171	1	3403	tags=50%, list=31%, signal=73%
NAGASHIMA_NRG1_SIGNALING_UP	114	0.282799	1.04873	0.397566	0.834741	1	3289	tags=44%, list=30%, signal=62%
PID_ERBB4_PATHWAY	22	0.340854	1.05445	0.398357	0.837635	1	3055	tags=45%, list=28%, signal=63%
BONOME_OVARIAN_CANCER_SURVIVAL_OPTIMAL_DEBULKING	146	0.216698	1.02624	0.398357	0.841162	1	2577	tags=28%, list=24%, signal=36%
VART_KSHV_INFECTION_ANGIOGENIC_MARKERS_UP	84	0.298085	1.03512	0.398734	0.832353	1	2520	tags=33%, list=23%, signal=43%
STONER_ESOPHAGEAL_CARCINOGENESIS_UP	23	0.341034	1.03576	0.399185	0.831538	1	2906	tags=43%, list=27%, signal=59%
FURUKAWA_DUSP6_TARGETS_PCI35_DN	43	0.346929	1.04493	0.399194	0.832222	1	1730	tags=26%, list=16%, signal=30%
NOUSHMEHR_GBM_SILENCED_BY_METHYLATION	29	0.326476	1.04332	0.399194	0.832047	1	2272	tags=28%, list=21%, signal=35%
SHIN_B_CELL_LYMPHOMA_CLUSTER_2	20	0.328258	1.03469	0.399573	0.830137	1	1208	tags=20%, list=11%, signal=22%
FOURNIER_ACINAR_DEVELOPMENT_LATE_2	158	0.283495	1.01798	0.399598	0.846062	1	3600	tags=39%, list=33%, signal=57%
ROZANOV_MMP14_TARGETS_SUBSET	18	0.383817	1.05054	0.400394	0.83894	1	3654	tags=50%, list=34%, signal=75%
REACTOME_TRIGLYCERIDE_BIOSYNTHESIS	20	0.368931	1.05404	0.400424	0.836821	1	1465	tags=30%, list=14%, signal=35%
YAO_TEMPORAL_RESPONSE_TO_PROGESTERONE_CLUSTER_1	48	0.288463	1.02152	0.40121	0.847144	1	1628	tags=25%, list=15%, signal=29%
ST_ERK1_ERK2_MAPK_PATHWAY	16	0.33461	1.00463	0.401235	0.850494	1	1124	tags=25%, list=10%, signal=28%
MULLIGHAN_NPM1_SIGNATURE_3_DN	94	0.259421	1.03823	0.401606	0.831194	1	3003	tags=35%, list=28%, signal=48%
BERNARD_PPAPDC1B_TARGETS_DN	33	0.297329	1.03439	0.401942	0.83005	1	2186	tags=30%, list=20%, signal=38%
KEGG_PHOSPHATIDYLINOSITOL_SIGNALING_SYSTEM	47	0.271836	1.0262	0.402516	0.840412	1	677	tags=13%, list=6%, signal=14%
REACTOME_CELL_CYCLE_MITOTIC	169	0.279472	1.0192	0.402697	0.848796	1	3591	tags=41%, list=33%, signal=60%
REACTOME_G_ALPHA_S_SIGNALLING_EVENTS	65	0.276533	1.0322	0.403509	0.830461	1	2605	tags=34%, list=24%, signal=44%
PID_ANGIOPOIETIN_RECEPTOR_PATHWAY	27	0.324054	1.04145	0.40396	0.833257	1	2661	tags=30%, list=25%, signal=39%
SCHLOSSER_SERUM_RESPONSE_UP	74	0.309024	1.0483	0.404255	0.834931	1	2963	tags=36%, list=27%, signal=50%
ISHIDA_E2F_TARGETS	35	0.43204	1.08436	0.40458	0.817619	1	3970	tags=54%, list=37%, signal=85%
NOJIMA_SFRP2_TARGETS_UP	19	0.362592	1.0349	0.404711	0.830412	1	4374	tags=68%, list=40%, signal=115%
VANHARANTA_UTERINE_FIBROID_DN	40	0.317635	1.0466	0.404762	0.834026	1	2171	tags=33%, list=20%, signal=41%
YU_BAP1_TARGETS	17	0.367165	1.05444	0.40481	0.83676	1	4795	tags=71%, list=44%, signal=126%
BROWNE_HCMV_INFECTION_16HR_UP	116	0.260388	1.04388	0.406312	0.831536	1	2324	tags=24%, list=21%, signal=30%
CHIBA_RESPONSE_TO_TSA	28	0.316666	1.04199	0.40678	0.833613	1	3312	tags=43%, list=31%, signal=62%
WESTON_VEGFA_TARGETS	65	0.288008	1.03878	0.407025	0.831497	1	1840	tags=23%, list=17%, signal=28%
YAGI_AML_WITH_T_8_21_TRANSLOCATION	200	0.212884	1.0185	0.407708	0.846406	1	2868	tags=28%, list=26%, signal=37%
HORIUCHI_WTAP_TARGETS_DN	180	0.295734	1.05933	0.408124	0.834889	1	3650	tags=47%, list=34%, signal=69%
DOANE_BREAST_CANCER_ESR1_UP	71	0.26653	1.0408	0.408915	0.833158	1	2415	tags=32%, list=22%, signal=41%
BURTON_ADIPOGENESIS_12	19	0.407921	1.04634	0.409266	0.832916	1	1658	tags=26%, list=15%, signal=31%
HESS_TARGETS_OF_HOXA9_AND_MEIS1_DN	53	0.313833	1.03909	0.410101	0.832398	1	3234	tags=43%, list=30%, signal=62%
HOLLEMAN_VINCRISTINE_RESISTANCE_B_ALL_UP	22	0.344859	1.03323	0.411306	0.830499	1	4186	tags=59%, list=39%, signal=96%
UZONYI_RESPONSE_TO_LEUKOTRIENE_AND_THROMBIN	24	0.390936	1.04927	0.413088	0.834227	1	1626	tags=33%, list=15%, signal=39%
DORN_ADENOVIRUS_INFECTION_24HR_DN	31	0.320369	1.04071	0.413361	0.832532	1	3662	tags=52%, list=34%, signal=78%
SHEDDEN_LUNG_CANCER_GOOD_SURVIVAL_A12	166	0.227263	1.00415	0.414013	0.850841	1	2156	tags=22%, list=20%, signal=27%
KEGG_NON_SMALL_CELL_LUNG_CANCER	28	0.283633	1.01067	0.414433	0.851533	1	2713	tags=29%, list=25%, signal=38%
UROSEVIC_RESPONSE_TO_IMIQUIMOD	16	0.488916	1.09695	0.414583	0.809731	1	3717	tags=63%, list=34%, signal=95%
AMIT_SERUM_RESPONSE_40_MCF10A	21	0.387044	1.03832	0.414938	0.831805	1	1868	tags=33%, list=17%, signal=40%
KOKKINAKIS_METHIONINE_DEPRIVATION_48HR_UP	72	0.250561	1.02912	0.415385	0.835654	1	1616	tags=21%, list=15%, signal=24%
BENPORATH_CYCLING_GENES	373	0.238716	1.01857	0.415534	0.847035	1	3535	tags=38%, list=33%, signal=55%
ODONNELL_TARGETS_OF_MYC_AND_TFRC_UP	39	0.342818	1.03435	0.415822	0.82932	1	2553	tags=38%, list=24%, signal=50%
RUAN_RESPONSE_TO_TROGLITAZONE_UP	16	0.355538	1.03782	0.415842	0.830492	1	1416	tags=38%, list=13%, signal=43%
CERIBELLI_GENES_INACTIVE_AND_BOUND_BY_NFY	17	0.356371	1.03506	0.418838	0.83078	1	2715	tags=35%, list=25%, signal=47%
ZHU_CMV_24_HR_UP	53	0.28633	1.0226	0.419492	0.846016	1	1978	tags=23%, list=18%, signal=28%
LEE_METASTASIS_AND_ALTERNATIVE_SPLICING_UP	48	0.261737	1.00345	0.419624	0.848608	1	3183	tags=40%, list=29%, signal=56%
HATADA_METHYLATED_IN_LUNG_CANCER_UP	203	0.219975	0.996876	0.419922	0.849808	1	2999	tags=31%, list=28%, signal=42%
MURAKAMI_UV_RESPONSE_24HR	15	0.385655	1.04449	0.420168	0.832504	1	755	tags=20%, list=7%, signal=21%
BIOCARTA_AKT_PATHWAY	15	0.358501	1.03596	0.421811	0.832701	1	2607	tags=33%, list=24%, signal=44%
REACTOME_MITOTIC_PROMETAPHASE	43	0.357546	1.0457	0.421875	0.832892	1	3474	tags=44%, list=32%, signal=65%
WHITFIELD_CELL_CYCLE_LITERATURE	27	0.467975	1.09583	0.422091	0.80999	1	4292	tags=70%, list=40%, signal=116%
FLECHNER_PBL_KIDNEY_TRANSPLANT_REJECTED_VS_OK_UP	39	0.253681	1.00178	0.422311	0.846369	1	3231	tags=41%, list=30%, signal=58%
ST_GA13_PATHWAY	26	0.293693	1.01912	0.422397	0.847351	1	2610	tags=42%, list=24%, signal=56%
GARGALOVIC_RESPONSE_TO_OXIDIZED_PHOSPHOLIPIDS_TURQUOISE_DN	35	0.341684	1.04558	0.422535	0.832344	1	1994	tags=31%, list=18%, signal=38%
XU_GH1_EXOGENOUS_TARGETS_UP	40	0.279178	1.00197	0.422932	0.846671	1	977	tags=20%, list=9%, signal=22%
MISSIAGLIA_REGULATED_BY_METHYLATION_DN	73	0.353026	1.05162	0.423828	0.837862	1	2982	tags=40%, list=28%, signal=54%
TARTE_PLASMA_CELL_VS_PLASMABLAST_UP	208	0.243628	1.00921	0.42418	0.85124	1	1801	tags=24%, list=17%, signal=28%
BASSO_HAIRY_CELL_LEUKEMIA_UP	51	0.280937	1.00708	0.424303	0.850769	1	1969	tags=31%, list=18%, signal=38%
MORI_LARGE_PRE_BII_LYMPHOCYTE_UP	53	0.377615	1.04656	0.425703	0.833248	1	3503	tags=47%, list=32%, signal=69%
ZWANG_CLASS_3_TRANSIENTLY_INDUCED_BY_EGF	130	0.276621	1.0199	0.426229	0.847864	1	2639	tags=36%, list=24%, signal=47%
ZEMBUTSU_SENSITIVITY_TO_CISPLATIN	16	0.339268	1.01274	0.428	0.848774	1	2415	tags=50%, list=22%, signal=64%
TCGA_GLIOBLASTOMA_COPY_NUMBER_DN	15	0.390624	1.04982	0.428023	0.835375	1	2678	tags=47%, list=25%, signal=62%
REACTOME_METABOLISM_OF_NUCLEOTIDES	42	0.286235	1.01581	0.428266	0.846706	1	2072	tags=24%, list=19%, signal=29%
MOREAUX_MULTIPLE_MYELOMA_BY_TACI_UP	233	0.23325	1.01304	0.428279	0.848843	1	2301	tags=27%, list=21%, signal=34%
HOEBEKE_LYMPHOID_STEM_CELL_UP	54	0.30305	1.03675	0.428571	0.832326	1	2996	tags=37%, list=28%, signal=51%
BEIER_GLIOMA_STEM_CELL_DN	39	0.29074	1.00413	0.428858	0.850087	1	1812	tags=28%, list=17%, signal=34%
WESTON_VEGFA_TARGETS_6HR	36	0.317078	1.00906	0.429448	0.850774	1	1840	tags=28%, list=17%, signal=33%
PID_P53_DOWNSTREAM_PATHWAY	75	0.253547	1.02274	0.429501	0.846491	1	3872	tags=51%, list=36%, signal=78%
PID_RAS_PATHWAY	15	0.348892	1.01718	0.430353	0.845687	1	2606	tags=40%, list=24%, signal=53%
LY_AGING_OLD_DN	35	0.346403	1.01918	0.430769	0.848018	1	3816	tags=57%, list=35%, signal=88%
PANGAS_TUMOR_SUPPRESSION_BY_SMAD1_AND_SMAD5_UP	71	0.258872	1.02138	0.43083	0.846665	1	2688	tags=31%, list=25%, signal=41%
LIU_SMARCA4_TARGETS	29	0.310477	1.01249	0.430998	0.848576	1	3223	tags=55%, list=30%, signal=78%
CHANG_IMMORTALIZED_BY_HPV31_DN	40	0.350744	1.0253	0.43133	0.840944	1	2016	tags=40%, list=19%, signal=49%
RIZKI_TUMOR_INVASIVENESS_3D_DN	169	0.211066	1.00356	0.433468	0.849939	1	2641	tags=27%, list=24%, signal=35%
KEGG_CARDIAC_MUSCLE_CONTRACTION	44	0.296287	1.00905	0.433962	0.849996	1	988	tags=20%, list=9%, signal=22%
NAKAMURA_ADIPOGENESIS_EARLY_DN	25	0.328379	1.01603	0.434077	0.846953	1	508	tags=16%, list=5%, signal=17%
FLECHNER_PBL_KIDNEY_TRANSPLANT_OK_VS_DONOR_DN	23	0.330716	1.03229	0.434608	0.831073	1	4531	tags=61%, list=42%, signal=104%
AMIT_EGF_RESPONSE_240_HELA	39	0.293547	1.0203	0.434608	0.847712	1	2290	tags=33%, list=21%, signal=42%
GROSS_HYPOXIA_VIA_ELK3_AND_HIF1A_DN	54	0.245435	0.993698	0.434608	0.849942	1	1792	tags=20%, list=17%, signal=24%
KHETCHOUMIAN_TRIM24_TARGETS_UP	22	0.345901	0.993046	0.435052	0.849199	1	1361	tags=27%, list=13%, signal=31%
YANG_BREAST_CANCER_ESR1_DN	17	0.325379	1.01496	0.435115	0.846353	1	2916	tags=41%, list=27%, signal=56%
PID_E2F_PATHWAY	43	0.292013	1.01831	0.435798	0.84605	1	3495	tags=51%, list=32%, signal=75%
ASTIER_INTEGRIN_SIGNALING	27	0.29755	1.01618	0.436047	0.84742	1	2992	tags=44%, list=28%, signal=61%
BORCZUK_MALIGNANT_MESOTHELIOMA_DN	51	0.304536	1.02137	0.436559	0.845865	1	3279	tags=45%, list=30%, signal=64%
KRASNOSELSKAYA_ILF3_TARGETS_UP	23	0.369685	1.01552	0.437137	0.845745	1	2742	tags=39%, list=25%, signal=52%
SESTO_RESPONSE_TO_UV_C7	39	0.309516	1.01128	0.437247	0.850804	1	3240	tags=36%, list=30%, signal=51%
SEITZ_NEOPLASTIC_TRANSFORMATION_BY_8P_DELETION_UP	44	0.320092	1.0141	0.439306	0.84776	1	2499	tags=25%, list=23%, signal=32%
YEGNASUBRAMANIAN_PROSTATE_CANCER	70	0.268477	0.996825	0.439539	0.849158	1	2677	tags=31%, list=25%, signal=41%
REACTOME_DNA_REPLICATION	99	0.293679	0.987931	0.439539	0.850019	1	3865	tags=45%, list=36%, signal=70%
PEART_HDAC_PROLIFERATION_CLUSTER_DN	47	0.27928	1.00347	0.440945	0.849373	1	1817	tags=21%, list=17%, signal=25%
REACTOME_DEPOSITION_OF_NEW_CENPA_CONTAINING_NUCLEOSOMES_AT_THE_CENTROMERE	33	0.356163	1.00971	0.441057	0.850775	1	2753	tags=36%, list=25%, signal=49%
REACTOME_CELL_CYCLE	224	0.258599	0.994608	0.441118	0.849983	1	3763	tags=41%, list=35%, signal=62%
REACTOME_SIGNALING_BY_RHO_GTPASES	70	0.252743	1.00982	0.442561	0.851306	1	2799	tags=34%, list=26%, signal=46%
BENPORATH_NOS_TARGETS	112	0.241292	0.999653	0.44334	0.848509	1	3098	tags=35%, list=29%, signal=48%
BECKER_TAMOXIFEN_RESISTANCE_DN	28	0.312023	1.00138	0.444444	0.846516	1	1475	tags=29%, list=14%, signal=33%
MCCABE_BOUND_BY_HOXC6	230	0.199372	1.00278	0.445312	0.849477	1	2401	tags=24%, list=22%, signal=30%
ABE_VEGFA_TARGETS_30MIN	19	0.333041	1.0083	0.445972	0.849405	1	1667	tags=26%, list=15%, signal=31%
PLASARI_TGFB1_TARGETS_1HR_UP	23	0.367119	1.03259	0.446	0.831205	1	3437	tags=57%, list=32%, signal=83%
VART_KSHV_INFECTION_ANGIOGENIC_MARKERS_DN	73	0.276323	1.01775	0.446247	0.845827	1	2525	tags=34%, list=23%, signal=44%
MARSON_FOXP3_TARGETS_DN	33	0.323627	1.01758	0.446316	0.845439	1	2844	tags=45%, list=26%, signal=61%
LOPES_METHYLATED_IN_COLON_CANCER_UP	16	0.354722	1.00842	0.446465	0.849955	1	1795	tags=31%, list=17%, signal=37%
TONKS_TARGETS_OF_RUNX1_RUNX1T1_FUSION_ERYTHROCYTE_UP	95	0.262747	0.998693	0.446465	0.848568	1	2370	tags=32%, list=22%, signal=40%
HOLLMANN_APOPTOSIS_VIA_CD40_UP	109	0.241675	1.00209	0.446623	0.847975	1	2351	tags=25%, list=22%, signal=31%
SABATES_COLORECTAL_ADENOMA_DN	147	0.26339	1.00556	0.447639	0.85056	1	1651	tags=22%, list=15%, signal=26%
LEE_TARGETS_OF_PTCH1_AND_SUFU_DN	44	0.282861	0.996584	0.447699	0.848939	1	2891	tags=36%, list=27%, signal=49%
CHYLA_CBFA2T3_TARGETS_DN	131	0.218724	1.0025	0.448743	0.849386	1	2924	tags=32%, list=27%, signal=43%
WEST_ADRENOCORTICAL_TUMOR_UP	166	0.257405	0.976718	0.449692	0.852139	1	3515	tags=39%, list=32%, signal=56%
BIOCARTA_GLEEVEC_PATHWAY	17	0.337075	1.02259	0.449791	0.845188	1	2607	tags=41%, list=24%, signal=54%
NIELSEN_LEIOMYOSARCOMA_CNN1_DN	15	0.39405	1.01386	0.450098	0.8475	1	1540	tags=27%, list=14%, signal=31%
GRAHAM_CML_DIVIDING_VS_NORMAL_QUIESCENT_UP	123	0.298926	0.991344	0.450292	0.847857	1	4025	tags=48%, list=37%, signal=75%
DELASERNA_MYOD_TARGETS_UP	48	0.298727	1.01554	0.450317	0.84652	1	2819	tags=42%, list=26%, signal=56%
REACTOME_APC_C_CDC20_MEDIATED_DEGRADATION_OF_MITOTIC_PROTEINS	39	0.34489	1.00696	0.451477	0.850288	1	3865	tags=54%, list=36%, signal=83%
CHIARADONNA_NEOPLASTIC_TRANSFORMATION_CDC25_UP	71	0.272109	0.992555	0.451613	0.849555	1	1818	tags=23%, list=17%, signal=27%
KOKKINAKIS_METHIONINE_DEPRIVATION_96HR_UP	68	0.243496	0.977617	0.451737	0.851495	1	795	tags=16%, list=7%, signal=17%
RHEIN_ALL_GLUCOCORTICOID_THERAPY_UP	53	0.295438	1.004	0.452954	0.849633	1	2029	tags=28%, list=19%, signal=35%
HOELZEL_NF1_TARGETS_UP	76	0.267615	0.997682	0.453846	0.849483	1	2638	tags=32%, list=24%, signal=41%
YAMAZAKI_TCEB3_TARGETS_UP	104	0.246303	0.983947	0.454012	0.848174	1	3645	tags=43%, list=34%, signal=65%
OUILLETTE_CLL_13Q14_DELETION_DN	34	0.26572	0.993839	0.454023	0.851171	1	248	tags=9%, list=2%, signal=9%
BLUM_RESPONSE_TO_SALIRASIB_DN	215	0.250653	0.977237	0.454717	0.851638	1	3449	tags=39%, list=32%, signal=56%
DOANE_RESPONSE_TO_ANDROGEN_DN	142	0.214332	1.00241	0.454894	0.848817	1	2425	tags=26%, list=22%, signal=33%
WANG_RESPONSE_TO_BEXAROTENE_UP	22	0.300972	0.99383	0.45491	0.850411	1	3040	tags=41%, list=28%, signal=57%
COLIN_PILOCYTIC_ASTROCYTOMA_VS_GLIOBLASTOMA_UP	24	0.320376	0.996295	0.455426	0.848895	1	1578	tags=21%, list=15%, signal=24%
MAYBURD_RESPONSE_TO_L663536_UP	19	0.327937	1.00132	0.455852	0.845883	1	2846	tags=37%, list=26%, signal=50%
PARK_HSC_MARKERS	28	0.282634	1.00815	0.456103	0.84894	1	2367	tags=29%, list=22%, signal=36%
BERENJENO_TRANSFORMED_BY_RHOA_REVERSIBLY_DN	21	0.351295	1.00465	0.45625	0.851254	1	617	tags=19%, list=6%, signal=20%
BROWNE_HCMV_INFECTION_10HR_UP	53	0.254483	0.994641	0.456814	0.85066	1	2484	tags=28%, list=23%, signal=37%
BASSO_B_LYMPHOCYTE_NETWORK	79	0.265732	0.995313	0.457447	0.849831	1	1599	tags=19%, list=15%, signal=22%
HAN_SATB1_TARGETS_DN	240	0.207485	0.987634	0.457557	0.849242	1	3190	tags=34%, list=29%, signal=47%
REACTOME_APOPTOSIS	76	0.268151	1.00874	0.457701	0.849961	1	2819	tags=32%, list=26%, signal=42%
RAO_BOUND_BY_SALL4_ISOFORM_A	86	0.230901	0.987404	0.458586	0.847526	1	2039	tags=23%, list=19%, signal=28%
AMIT_EGF_RESPONSE_120_MCF10A	24	0.327667	0.974262	0.458586	0.851338	1	3234	tags=54%, list=30%, signal=77%
REACTOME_DIABETES_PATHWAYS	75	0.244199	0.982244	0.45929	0.848509	1	3402	tags=33%, list=31%, signal=48%
MALONEY_RESPONSE_TO_17AAG_UP	22	0.333348	1.01903	0.45935	0.846747	1	2554	tags=32%, list=24%, signal=42%
BYSTROEM_CORRELATED_WITH_IL5_DN	33	0.310896	0.999314	0.459406	0.847785	1	3143	tags=39%, list=29%, signal=55%
PID_CASPASE_PATHWAY	28	0.275901	0.960748	0.459839	0.8663	1	2192	tags=25%, list=20%, signal=31%
LEE_LIVER_CANCER_ACOX1_DN	47	0.279857	0.986158	0.460348	0.848959	1	2302	tags=34%, list=21%, signal=43%
KIM_GLIS2_TARGETS_UP	58	0.331259	1.00573	0.460417	0.850963	1	2649	tags=38%, list=24%, signal=50%
IWANAGA_E2F1_TARGETS_INDUCED_BY_SERUM	20	0.383877	1.00605	0.461078	0.850935	1	1026	tags=25%, list=9%, signal=28%
KEGG_CELL_CYCLE	75	0.278964	0.975199	0.461089	0.851295	1	3869	tags=47%, list=36%, signal=72%
KEGG_LINOLEIC_ACID_METABOLISM	19	0.380172	0.997581	0.46124	0.84894	1	222	tags=16%, list=2%, signal=16%
REACTOME_CELL_CYCLE_CHECKPOINTS	70	0.309265	0.982951	0.461378	0.847555	1	4438	tags=54%, list=41%, signal=91%
WONG_ADULT_TISSUE_STEM_MODULE	426	0.224127	1.00691	0.461538	0.849624	1	1855	tags=20%, list=17%, signal=23%
REACTOME_RNA_POL_I_RNA_POL_III_AND_MITOCHONDRIAL_TRANSCRIPTION	61	0.290384	0.969441	0.462151	0.857903	1	4033	tags=46%, list=37%, signal=73%
BAELDE_DIABETIC_NEPHROPATHY_UP	53	0.296884	0.987435	0.462343	0.848206	1	2491	tags=34%, list=23%, signal=44%
SENGUPTA_NASOPHARYNGEAL_CARCINOMA_UP	166	0.300696	1.01044	0.463366	0.851283	1	3545	tags=45%, list=33%, signal=66%
CHEN_LVAD_SUPPORT_OF_FAILING_HEART_DN	21	0.301882	0.983017	0.463366	0.848906	1	2066	tags=33%, list=19%, signal=41%
CROONQUIST_STROMAL_STIMULATION_UP	32	0.345773	0.989237	0.46371	0.849037	1	2066	tags=34%, list=19%, signal=42%
BENPORATH_ES_1	221	0.248339	0.991391	0.463938	0.849288	1	3503	tags=39%, list=32%, signal=57%
PRAMOONJAGO_SOX4_TARGETS_UP	28	0.30903	0.991242	0.464135	0.846562	1	474	tags=18%, list=4%, signal=19%
MORI_SMALL_PRE_BII_LYMPHOCYTE_UP	49	0.254139	0.993316	0.464516	0.849302	1	2461	tags=33%, list=23%, signal=42%
LIN_NPAS4_TARGETS_UP	79	0.230958	0.99353	0.465619	0.849572	1	3662	tags=43%, list=34%, signal=65%
WU_APOPTOSIS_BY_CDKN1A_VIA_TP53	33	0.373404	1.00129	0.465909	0.845183	1	3503	tags=52%, list=32%, signal=76%
HERNANDEZ_MITOTIC_ARREST_BY_DOCETAXEL_1_DN	28	0.284395	0.985343	0.465979	0.848571	1	2152	tags=25%, list=20%, signal=31%
SHEPARD_CRUSH_AND_BURN_MUTANT_DN	104	0.245962	0.961388	0.466151	0.867036	1	3540	tags=43%, list=33%, signal=64%
MCDOWELL_ACUTE_LUNG_INJURY_DN	21	0.334482	0.995412	0.466395	0.850346	1	2834	tags=48%, list=26%, signal=64%
KEGG_REGULATION_OF_AUTOPHAGY	17	0.327936	0.981153	0.466531	0.848189	1	2503	tags=41%, list=23%, signal=53%
REACTOME_GABA_RECEPTOR_ACTIVATION	29	0.294267	0.988626	0.467327	0.849803	1	2605	tags=41%, list=24%, signal=54%
REACTOME_MUSCLE_CONTRACTION	28	0.370876	1.01042	0.467368	0.850508	1	1278	tags=29%, list=12%, signal=32%
BRUINS_UVC_RESPONSE_VIA_TP53_GROUP_A	497	0.196163	0.985079	0.468041	0.848421	1	1805	tags=19%, list=17%, signal=22%
YANG_BREAST_CANCER_ESR1_UP	24	0.295855	0.976563	0.468504	0.851737	1	1627	tags=21%, list=15%, signal=24%
REACTOME_RIG_I_MDA5_MEDIATED_INDUCTION_OF_IFN_ALPHA_BETA_PATHWAYS	38	0.294708	0.991952	0.46856	0.849432	1	2729	tags=37%, list=25%, signal=49%
JIANG_TIP30_TARGETS_UP	27	0.321797	0.986453	0.469307	0.84897	1	3816	tags=44%, list=35%, signal=68%
LEE_LIVER_CANCER_MYC_DN	35	0.310539	0.997932	0.469548	0.849627	1	3481	tags=49%, list=32%, signal=71%
WINNEPENNINCKX_MELANOMA_METASTASIS_UP	78	0.342136	1.00197	0.470019	0.847461	1	3681	tags=53%, list=34%, signal=79%
CAFFAREL_RESPONSE_TO_THC_DN	16	0.352563	0.986066	0.472946	0.848409	1	593	tags=19%, list=5%, signal=20%
GRAESSMANN_RESPONSE_TO_MC_AND_SERUM_DEPRIVATION_DN	48	0.288279	0.992256	0.473002	0.849489	1	2825	tags=35%, list=26%, signal=48%
FERRANDO_T_ALL_WITH_MLL_ENL_FUSION_DN	59	0.264194	0.979369	0.473684	0.848698	1	3591	tags=46%, list=33%, signal=68%
ICHIBA_GRAFT_VERSUS_HOST_DISEASE_35D_DN	32	0.30574	0.987728	0.473988	0.849788	1	3051	tags=44%, list=28%, signal=61%
REACTOME_SPHINGOLIPID_DE_NOVO_BIOSYNTHESIS	18	0.351435	1.00544	0.474012	0.850054	1	3530	tags=50%, list=33%, signal=74%
PARK_TRETINOIN_RESPONSE_AND_PML_RARA_FUSION	15	0.412783	1.00211	0.474012	0.848727	1	2793	tags=47%, list=26%, signal=63%
DACOSTA_UV_RESPONSE_VIA_ERCC3_XPCS_UP	16	0.328824	0.991431	0.47495	0.849966	1	2421	tags=31%, list=22%, signal=40%
REACTOME_PI3K_EVENTS_IN_ERBB4_SIGNALING	19	0.325179	0.991346	0.47495	0.848623	1	1627	tags=21%, list=15%, signal=25%
CROONQUIST_IL6_DEPRIVATION_DN	64	0.358465	0.999475	0.475	0.848185	1	3503	tags=52%, list=32%, signal=76%
REACTOME_MITOTIC_G1_G1_S_PHASES	72	0.289575	0.960035	0.47541	0.865861	1	3865	tags=49%, list=36%, signal=75%
ACEVEDO_LIVER_TUMOR_VS_NORMAL_ADJACENT_TISSUE_DN	154	0.23026	0.988145	0.475442	0.850251	1	1482	tags=19%, list=14%, signal=22%
ELLWOOD_MYC_TARGETS_DN	20	0.313309	0.968803	0.47551	0.857986	1	1059	tags=20%, list=10%, signal=22%
ZHOU_INFLAMMATORY_RESPONSE_LIVE_UP	252	0.205807	0.964255	0.47551	0.862988	1	2374	tags=23%, list=22%, signal=29%
SONG_TARGETS_OF_IE86_CMV_PROTEIN	28	0.353862	0.976042	0.475728	0.851543	1	3502	tags=43%, list=32%, signal=63%
ROME_INSULIN_TARGETS_IN_MUSCLE_DN	92	0.227266	0.984652	0.475822	0.847924	1	2008	tags=24%, list=19%, signal=29%
TRAYNOR_RETT_SYNDROM_UP	21	0.312818	0.967077	0.475904	0.859216	1	2590	tags=33%, list=24%, signal=44%
GENTILE_UV_RESPONSE_CLUSTER_D5	21	0.318664	0.981277	0.476923	0.848635	1	1688	tags=19%, list=16%, signal=23%
KRIEG_KDM3A_TARGETS_NOT_HYPOXIA	105	0.2235	0.968963	0.477459	0.858301	1	992	tags=13%, list=9%, signal=15%
JI_RESPONSE_TO_FSH_DN	39	0.308553	0.967977	0.477733	0.858412	1	1772	tags=23%, list=16%, signal=27%
GOBERT_OLIGODENDROCYTE_DIFFERENTIATION_UP	322	0.268639	0.967505	0.479452	0.858889	1	3431	tags=38%, list=32%, signal=53%
BOYAULT_LIVER_CANCER_SUBCLASS_G2	20	0.308849	0.987453	0.479478	0.848923	1	1372	tags=25%, list=13%, signal=29%
WANG_LMO4_TARGETS_DN	200	0.229705	0.975199	0.479532	0.850556	1	2666	tags=27%, list=25%, signal=35%
SCIAN_INVERSED_TARGETS_OF_TP53_AND_TP73_DN	21	0.309204	0.984816	0.479839	0.848306	1	2119	tags=29%, list=20%, signal=35%
VALK_AML_CLUSTER_6	24	0.288246	0.979701	0.480469	0.849362	1	703	tags=17%, list=6%, signal=18%
CHICAS_RB1_TARGETS_GROWING	141	0.263639	0.980531	0.480769	0.848129	1	3666	tags=42%, list=34%, signal=62%
PID_ALPHA_SYNUCLEIN_PATHWAY	22	0.341286	0.990208	0.481153	0.847451	1	1543	tags=27%, list=14%, signal=32%
KANG_IMMORTALIZED_BY_TERT_UP	49	0.25254	0.961493	0.481557	0.867488	1	2426	tags=27%, list=22%, signal=34%
IIZUKA_LIVER_CANCER_PROGRESSION_G1_G2_DN	16	0.327853	0.982219	0.481696	0.847823	1	3240	tags=50%, list=30%, signal=71%
STAMBOLSKY_RESPONSE_TO_VITAMIN_D3_DN	15	0.344078	0.980534	0.481766	0.84887	1	1900	tags=20%, list=18%, signal=24%
TCGA_GLIOBLASTOMA_COPY_NUMBER_UP	42	0.294153	0.985625	0.482	0.848721	1	1936	tags=29%, list=18%, signal=35%
PYEON_HPV_POSITIVE_TUMORS_UP	56	0.321672	0.98394	0.482	0.847438	1	3608	tags=45%, list=33%, signal=67%
CLASPER_LYMPHATIC_VESSELS_DURING_METASTASIS_DN	26	0.360348	0.962002	0.482143	0.866932	1	508	tags=19%, list=5%, signal=20%
RODRIGUES_THYROID_CARCINOMA_ANAPLASTIC_UP	386	0.271392	0.944291	0.482558	0.87694	1	3976	tags=46%, list=37%, signal=70%
SMID_BREAST_CANCER_ERBB2_UP	82	0.269642	0.984012	0.484536	0.848766	1	2761	tags=32%, list=25%, signal=42%
DANG_REGULATED_BY_MYC_DN	146	0.236104	0.966011	0.484536	0.860291	1	3186	tags=36%, list=29%, signal=50%
SASSON_RESPONSE_TO_FORSKOLIN_UP	59	0.271986	0.966087	0.485417	0.860821	1	2891	tags=39%, list=27%, signal=53%
REACTOME_RNA_POL_I_TRANSCRIPTION	47	0.300877	0.94576	0.486166	0.877095	1	3107	tags=36%, list=29%, signal=51%
SWEET_LUNG_CANCER_KRAS_UP	285	0.219116	0.990217	0.486542	0.848197	1	2349	tags=24%, list=22%, signal=29%
JOHNSTONE_PARVB_TARGETS_2_UP	84	0.273816	0.976392	0.488518	0.851408	1	2538	tags=31%, list=23%, signal=40%
RIGGI_EWING_SARCOMA_PROGENITOR_UP	257	0.219682	0.973084	0.489237	0.851208	1	1659	tags=20%, list=15%, signal=23%
CROMER_METASTASIS_DN	48	0.323461	0.97923	0.489837	0.848301	1	1233	tags=23%, list=11%, signal=26%
BRUECKNER_TARGETS_OF_MIRLET7A3_UP	64	0.253387	0.96531	0.489919	0.861213	1	1603	tags=22%, list=15%, signal=26%
PID_SHP2_PATHWAY	30	0.283079	0.9753	0.490946	0.851815	1	1124	tags=20%, list=10%, signal=22%
HEIDENBLAD_AMPLICON_8Q24_DN	26	0.298141	0.983005	0.493671	0.848175	1	2216	tags=27%, list=20%, signal=34%
CONCANNON_APOPTOSIS_BY_EPOXOMICIN_UP	154	0.213931	0.949751	0.493827	0.87501	1	2536	tags=26%, list=23%, signal=33%
YAGI_AML_WITH_T_9_11_TRANSLOCATION	80	0.219968	0.979431	0.494231	0.849303	1	3642	tags=43%, list=34%, signal=64%
CHARAFE_BREAST_CANCER_LUMINAL_VS_MESENCHYMAL_DN	273	0.237366	0.942534	0.49503	0.876226	1	1827	tags=21%, list=17%, signal=25%
SATO_SILENCED_BY_METHYLATION_IN_PANCREATIC_CANCER_2	28	0.289914	0.960082	0.495885	0.866485	1	3732	tags=57%, list=34%, signal=87%
REACTOME_ANTIGEN_PROCESSING_UBIQUITINATION_PROTEASOME_DEGRADATION	125	0.222719	0.951241	0.496829	0.872894	1	3395	tags=39%, list=31%, signal=56%
VALK_AML_CLUSTER_2	17	0.322743	0.971661	0.496982	0.853887	1	308	tags=18%, list=3%, signal=18%
BROWNE_HCMV_INFECTION_18HR_UP	108	0.246756	0.974753	0.497041	0.8509	1	2931	tags=31%, list=27%, signal=41%
PUJANA_XPRSS_INT_NETWORK	93	0.320299	0.974215	0.497053	0.850704	1	3474	tags=41%, list=32%, signal=60%
ZHU_CMV_ALL_DN	83	0.272063	0.97369	0.497053	0.850525	1	1575	tags=22%, list=15%, signal=25%
TOOKER_GEMCITABINE_RESISTANCE_DN	74	0.24549	0.959863	0.497942	0.865538	1	1804	tags=23%, list=17%, signal=27%
BILD_SRC_ONCOGENIC_SIGNATURE	36	0.292821	0.991325	0.498943	0.847125	1	2709	tags=31%, list=25%, signal=41%
TSAI_RESPONSE_TO_RADIATION_THERAPY	20	0.342835	0.968228	0.498982	0.858549	1	1009	tags=20%, list=9%, signal=22%
WEIGEL_OXIDATIVE_STRESS_BY_TBH_AND_H2O2	23	0.302509	0.961343	0.49899	0.866401	1	2333	tags=26%, list=22%, signal=33%
IZADPANAH_STEM_CELL_ADIPOSE_VS_BONE_UP	73	0.238536	0.957519	0.49899	0.864525	1	3234	tags=40%, list=30%, signal=56%
SCHAEFFER_PROSTATE_DEVELOPMENT_12HR_UP	69	0.258629	0.960868	0.5	0.866767	1	2415	tags=28%, list=22%, signal=35%
KEGG_GALACTOSE_METABOLISM	20	0.340656	0.951292	0.501048	0.873512	1	2314	tags=30%, list=21%, signal=38%
ROPERO_HDAC2_TARGETS	57	0.240553	0.975906	0.501075	0.851091	1	2567	tags=26%, list=24%, signal=34%
CHIANG_LIVER_CANCER_SUBCLASS_PROLIFERATION_UP	97	0.273176	0.930989	0.504708	0.886112	1	4025	tags=51%, list=37%, signal=80%
KANG_IMMORTALIZED_BY_TERT_DN	68	0.257997	0.951911	0.504836	0.874174	1	1273	tags=19%, list=12%, signal=22%
PID_INTEGRIN2_PATHWAY	19	0.398288	0.981551	0.50495	0.848741	1	2491	tags=37%, list=23%, signal=48%
GARCIA_TARGETS_OF_FLI1_AND_DAX1_DN	100	0.247617	0.933795	0.50499	0.88457	1	3582	tags=37%, list=33%, signal=55%
PID_PDGFRB_PATHWAY	69	0.243542	0.948823	0.505071	0.876415	1	3069	tags=35%, list=28%, signal=48%
MULLIGHAN_NPM1_MUTATED_SIGNATURE_2_DN	44	0.283231	0.943977	0.50625	0.876261	1	3003	tags=34%, list=28%, signal=47%
REACTOME_CHROMOSOME_MAINTENANCE	66	0.271935	0.923247	0.507099	0.885382	1	2768	tags=35%, list=26%, signal=47%
SCIBETTA_KDM5B_TARGETS_DN	44	0.256679	0.941957	0.508032	0.876113	1	3681	tags=43%, list=34%, signal=65%
GOLUB_ALL_VS_AML_UP	15	0.321414	0.951329	0.508841	0.874151	1	1978	tags=20%, list=18%, signal=24%
MANALO_HYPOXIA_UP	123	0.240573	0.953952	0.508982	0.870691	1	3378	tags=42%, list=31%, signal=61%
REACTOME_MEIOTIC_SYNAPSIS	41	0.291689	0.924872	0.509018	0.887134	1	3107	tags=41%, list=29%, signal=58%
REACTOME_CLASS_I_MHC_MEDIATED_ANTIGEN_PROCESSING_PRESENTATION	148	0.22388	0.948446	0.509355	0.875084	1	3878	tags=45%, list=36%, signal=70%
BIOCARTA_WNT_PATHWAY	17	0.312229	0.948249	0.51	0.874115	1	2369	tags=24%, list=22%, signal=30%
REACTOME_REGULATION_OF_APOPTOSIS	33	0.30433	0.921332	0.510246	0.884178	1	3865	tags=48%, list=36%, signal=75%
STEGER_ADIPOGENESIS_DN	15	0.353486	0.945183	0.510848	0.877705	1	1370	tags=33%, list=13%, signal=38%
PELLICCIOTTA_HDAC_IN_ANTIGEN_PRESENTATION_DN	31	0.338837	0.948412	0.511628	0.874433	1	4636	tags=65%, list=43%, signal=112%
REACTOME_CELL_DEATH_SIGNALLING_VIA_NRAGE_NRIF_AND_NADE	31	0.285903	0.958237	0.513258	0.864302	1	2799	tags=35%, list=26%, signal=48%
BILANGES_SERUM_SENSITIVE_VIA_TSC2	26	0.299536	0.959724	0.513619	0.865145	1	1843	tags=23%, list=17%, signal=28%
KONDO_EZH2_TARGETS	143	0.233226	0.958658	0.513834	0.865465	1	2594	tags=31%, list=24%, signal=40%
BROWNE_HCMV_INFECTION_48HR_DN	283	0.202803	0.957461	0.514228	0.863943	1	1925	tags=22%, list=18%, signal=26%
AMIT_SERUM_RESPONSE_240_MCF10A	29	0.320043	0.973744	0.515337	0.851132	1	2590	tags=34%, list=24%, signal=45%
BENPORATH_ES_CORE_NINE_CORRELATED	63	0.247533	0.943716	0.516327	0.874779	1	3073	tags=40%, list=28%, signal=55%
MIKKELSEN_IPS_WITH_HCP_H3K27ME3	51	0.279871	0.946421	0.516378	0.876259	1	957	tags=20%, list=9%, signal=21%
PARK_APL_PATHOGENESIS_DN	26	0.322163	0.923285	0.516667	0.885981	1	3960	tags=58%, list=37%, signal=91%
BIOCARTA_MPR_PATHWAY	18	0.298837	0.930695	0.516832	0.885332	1	3903	tags=56%, list=36%, signal=87%
TONKS_TARGETS_OF_RUNX1_RUNX1T1_FUSION_HSC_UP	108	0.235487	0.942311	0.517442	0.876012	1	2499	tags=30%, list=23%, signal=38%
CAMPS_COLON_CANCER_COPY_NUMBER_DN	31	0.280466	0.953096	0.517526	0.872057	1	3367	tags=42%, list=31%, signal=61%
REACTOME_ACTIVATION_OF_THE_PRE_REPLICATIVE_COMPLEX	17	0.386537	0.933647	0.518447	0.884142	1	4410	tags=59%, list=41%, signal=99%
KENNY_CTNNB1_TARGETS_DN	33	0.27463	0.958374	0.518664	0.865441	1	2926	tags=33%, list=27%, signal=46%
WANG_LSD1_TARGETS_DN	22	0.310208	0.959282	0.51927	0.864704	1	2872	tags=55%, list=27%, signal=74%
HELLER_HDAC_TARGETS_DN	166	0.21406	0.955117	0.519507	0.868703	1	3404	tags=35%, list=31%, signal=50%
SMIRNOV_RESPONSE_TO_IR_6HR_UP	94	0.22071	0.924132	0.519507	0.886747	1	3986	tags=45%, list=37%, signal=70%
SABATES_COLORECTAL_ADENOMA_UP	76	0.265596	0.95828	0.520309	0.864929	1	1319	tags=21%, list=12%, signal=24%
REACTOME_ACTIVATION_OF_NF_KAPPAB_IN_B_CELLS	40	0.309887	0.92282	0.520788	0.88496	1	4139	tags=58%, list=38%, signal=93%
SAKAI_TUMOR_INFILTRATING_MONOCYTES_DN	37	0.27259	0.944052	0.520958	0.876793	1	2644	tags=35%, list=24%, signal=46%
ROESSLER_LIVER_CANCER_METASTASIS_UP	49	0.245323	0.970204	0.521042	0.856792	1	1784	tags=27%, list=16%, signal=32%
SCHUETZ_BREAST_CANCER_DUCTAL_INVASIVE_UP	196	0.268128	0.919262	0.521318	0.882685	1	1805	tags=24%, list=17%, signal=29%
KRIGE_AMINO_ACID_DEPRIVATION	17	0.346394	0.947528	0.521385	0.875104	1	3669	tags=47%, list=34%, signal=71%
DUTERTRE_ESTRADIOL_RESPONSE_24HR_DN	303	0.227151	0.948674	0.522073	0.876034	1	2858	tags=31%, list=26%, signal=41%
DER_IFN_GAMMA_RESPONSE_UP	42	0.303473	0.928875	0.523077	0.883991	1	1264	tags=21%, list=12%, signal=24%
ZHANG_TLX_TARGETS_36HR_DN	111	0.338425	0.935462	0.523438	0.88419	1	3806	tags=47%, list=35%, signal=71%
JUBAN_TARGETS_OF_SPI1_AND_FLI1_UP	69	0.229714	0.957754	0.525773	0.864718	1	1852	tags=20%, list=17%, signal=24%
ADDYA_ERYTHROID_DIFFERENTIATION_BY_HEMIN	48	0.245902	0.939478	0.525773	0.879089	1	3931	tags=44%, list=36%, signal=68%
AGUIRRE_PANCREATIC_CANCER_COPY_NUMBER_DN	124	0.22084	0.926207	0.527607	0.885351	1	3616	tags=39%, list=33%, signal=57%
REACTOME_ADP_SIGNALLING_THROUGH_P2RY1	19	0.303647	0.943834	0.527725	0.875934	1	3010	tags=42%, list=28%, signal=58%
FEVR_CTNNB1_TARGETS_DN	329	0.23856	0.934855	0.528265	0.8842	1	3451	tags=37%, list=32%, signal=52%
PARENT_MTOR_SIGNALING_DN	23	0.30572	0.950561	0.529528	0.873774	1	1868	tags=30%, list=17%, signal=37%
PID_ERBB1_DOWNSTREAM_PATHWAY	64	0.239154	0.941794	0.529661	0.875052	1	2775	tags=30%, list=26%, signal=40%
SHAFFER_IRF4_TARGETS_IN_MYELOMA_VS_MATURE_B_LYMPHOCYTE	63	0.258542	0.944404	0.529774	0.877383	1	3402	tags=40%, list=31%, signal=58%
BERENJENO_TRANSFORMED_BY_RHOA_FOREVER_DN	19	0.328212	0.948633	0.530864	0.875402	1	2590	tags=37%, list=24%, signal=48%
KAUFFMANN_DNA_REPLICATION_GENES	85	0.250547	0.934267	0.531313	0.884183	1	3628	tags=41%, list=34%, signal=61%
HAMAI_APOPTOSIS_VIA_TRAIL_DN	107	0.256864	0.945091	0.531646	0.877165	1	2569	tags=30%, list=24%, signal=39%
BOCHKIS_FOXA2_TARGETS	245	0.197188	0.962678	0.531872	0.866052	1	2556	tags=28%, list=24%, signal=36%
COULOUARN_TEMPORAL_TGFB1_SIGNATURE_DN	79	0.259168	0.960445	0.534021	0.866315	1	1941	tags=24%, list=18%, signal=29%
HUANG_FOXA2_TARGETS_DN	17	0.328887	0.924633	0.534137	0.887003	1	2136	tags=35%, list=20%, signal=44%
SHIPP_DLBCL_CURED_VS_FATAL_DN	26	0.274764	0.930463	0.534553	0.88377	1	1626	tags=23%, list=15%, signal=27%
PANGAS_TUMOR_SUPPRESSION_BY_SMAD1_AND_SMAD5_DN	87	0.216331	0.959718	0.534749	0.864426	1	3737	tags=43%, list=35%, signal=64%
MULLIGHAN_MLL_SIGNATURE_2_UP	223	0.242769	0.928528	0.534884	0.884089	1	3366	tags=37%, list=31%, signal=53%
CHIBA_RESPONSE_TO_TSA_UP	32	0.307671	0.938123	0.535124	0.880161	1	2150	tags=28%, list=20%, signal=35%
REACTOME_G1_S_TRANSITION	60	0.287138	0.895957	0.535934	0.899393	1	3865	tags=48%, list=36%, signal=75%
ELVIDGE_HIF1A_AND_HIF2A_TARGETS_UP	21	0.308026	0.929073	0.536082	0.884257	1	714	tags=14%, list=7%, signal=15%
KEGG_PEROXISOME	45	0.258136	0.928484	0.536145	0.883486	1	2125	tags=24%, list=20%, signal=30%
PID_IL6_7_PATHWAY	29	0.288765	0.931974	0.53629	0.885249	1	1628	tags=28%, list=15%, signal=32%
NUTT_GBM_VS_AO_GLIOMA_UP	25	0.295392	0.938387	0.536822	0.880946	1	2474	tags=32%, list=23%, signal=41%
REACTOME_GLYCEROPHOSPHOLIPID_BIOSYNTHESIS	54	0.23744	0.943756	0.536998	0.875412	1	1235	tags=19%, list=11%, signal=21%
NUYTTEN_NIPP1_TARGETS_UP	420	0.221823	0.932927	0.53891	0.884458	1	3173	tags=34%, list=29%, signal=46%
REACTOME_NOD1_2_SIGNALING_PATHWAY	16	0.304987	0.921179	0.539419	0.883152	1	2778	tags=38%, list=26%, signal=50%
NATSUME_RESPONSE_TO_INTERFERON_BETA_DN	25	0.312005	0.918242	0.539583	0.883642	1	1085	tags=20%, list=10%, signal=22%
KEGG_PANCREATIC_CANCER	46	0.24813	0.93058	0.539715	0.884904	1	2607	tags=30%, list=24%, signal=40%
RAO_BOUND_BY_SALL4	144	0.218426	0.941944	0.539841	0.875425	1	2757	tags=28%, list=25%, signal=37%
HU_GENOTOXIC_DAMAGE_24HR	20	0.321234	0.932999	0.54262	0.884999	1	3221	tags=35%, list=30%, signal=50%
LEE_LIVER_CANCER_MYC_TGFA_DN	34	0.294729	0.94161	0.543651	0.874761	1	2302	tags=32%, list=21%, signal=41%
IWANAGA_CARCINOGENESIS_BY_KRAS_DN	69	0.227779	0.947389	0.545977	0.874679	1	2468	tags=29%, list=23%, signal=37%
RIGGINS_TAMOXIFEN_RESISTANCE_UP	42	0.27087	0.926493	0.547059	0.885374	1	2598	tags=31%, list=24%, signal=41%
MCCLUNG_DELTA_FOSB_TARGETS_8WK	25	0.286978	0.924474	0.547284	0.886672	1	2364	tags=32%, list=22%, signal=41%
PEDRIOLI_MIR31_TARGETS_DN	205	0.208297	0.943056	0.548638	0.875631	1	2400	tags=26%, list=22%, signal=33%
ACEVEDO_LIVER_CANCER_WITH_H3K9ME3_UP	66	0.235127	0.951497	0.548689	0.874475	1	2230	tags=24%, list=21%, signal=30%
SENESE_HDAC1_AND_HDAC2_TARGETS_DN	133	0.234116	0.92106	0.548708	0.882726	1	2985	tags=34%, list=28%, signal=46%
REACTOME_IL1_SIGNALING	20	0.294406	0.938373	0.548828	0.880265	1	2328	tags=45%, list=21%, signal=57%
LI_WILMS_TUMOR_VS_FETAL_KIDNEY_1_DN	100	0.26079	0.901345	0.549133	0.896465	1	3849	tags=48%, list=36%, signal=74%
SERVITJA_ISLET_HNF1A_TARGETS_UP	97	0.243934	0.935106	0.549696	0.884313	1	1328	tags=19%, list=12%, signal=21%
REACTOME_MITOTIC_G2_G2_M_PHASES	46	0.276095	0.929917	0.550098	0.883648	1	2090	tags=24%, list=19%, signal=30%
GROSS_HYPOXIA_VIA_ELK3_ONLY_UP	17	0.315744	0.92213	0.550781	0.88447	1	3889	tags=53%, list=36%, signal=82%
INGRAM_SHH_TARGETS_UP	74	0.233898	0.937334	0.55098	0.880629	1	1480	tags=16%, list=14%, signal=19%
STEARMAN_LUNG_CANCER_EARLY_VS_LATE_DN	36	0.309331	0.905364	0.551282	0.897446	1	2181	tags=31%, list=20%, signal=38%
EBAUER_MYOGENIC_TARGETS_OF_PAX3_FOXO1_FUSION	32	0.306325	0.932176	0.55144	0.88548	1	3614	tags=53%, list=33%, signal=80%
LINDGREN_BLADDER_CANCER_CLUSTER_1_DN	210	0.219646	0.904874	0.551515	0.896539	1	2688	tags=29%, list=25%, signal=38%
HOQUE_METHYLATED_IN_CANCER	39	0.246949	0.944805	0.553535	0.877137	1	1795	tags=23%, list=17%, signal=28%
WHITFIELD_CELL_CYCLE_M_G1	85	0.228128	0.90394	0.554192	0.897312	1	3610	tags=39%, list=33%, signal=58%
DACOSTA_ERCC3_ALLELE_XPCS_VS_TTD_DN	21	0.300642	0.926767	0.555133	0.885433	1	2359	tags=38%, list=22%, signal=49%
BIOCARTA_TNFR1_PATHWAY	16	0.311514	0.905419	0.55534	0.898002	1	2366	tags=25%, list=22%, signal=32%
REACTOME_APC_C_CDH1_MEDIATED_DEGRADATION_OF_CDC20_AND_OTHER_APC_C_CDH1_TARGETED_PROTEINS_IN_LATE_MITOSIS_EARLY_G1	38	0.306496	0.880564	0.555556	0.907029	1	4537	tags=61%, list=42%, signal=104%
SASSON_RESPONSE_TO_GONADOTROPHINS_UP	56	0.259986	0.917783	0.55668	0.884015	1	2852	tags=38%, list=26%, signal=51%
PASINI_SUZ12_TARGETS_DN	190	0.229413	0.900807	0.556701	0.895715	1	3234	tags=37%, list=30%, signal=52%
COULOUARN_TEMPORAL_TGFB1_SIGNATURE_UP	62	0.237914	0.921247	0.55754	0.883688	1	2624	tags=29%, list=24%, signal=38%
HU_GENOTOXIN_ACTION_DIRECT_VS_INDIRECT_24HR	29	0.263112	0.922398	0.558943	0.885227	1	3369	tags=38%, list=31%, signal=55%
PID_BETA_CATENIN_NUC_PATHWAY	55	0.243433	0.937538	0.559524	0.880825	1	582	tags=13%, list=5%, signal=13%
YIH_RESPONSE_TO_ARSENITE_C1	15	0.318954	0.901948	0.559761	0.895781	1	4282	tags=53%, list=40%, signal=88%
REACTOME_ANTIVIRAL_MECHANISM_BY_IFN_STIMULATED_GENES	42	0.256758	0.895415	0.559772	0.899268	1	3150	tags=31%, list=29%, signal=43%
LEE_LIVER_CANCER_CIPROFIBRATE_UP	35	0.271595	0.930822	0.560484	0.885786	1	3040	tags=40%, list=28%, signal=55%
MEISSNER_NPC_HCP_WITH_H3K4ME2	287	0.208244	0.923293	0.561024	0.886651	1	1827	tags=21%, list=17%, signal=24%
KEGG_ALDOSTERONE_REGULATED_SODIUM_REABSORPTION	20	0.295356	0.908537	0.561122	0.896405	1	702	tags=15%, list=6%, signal=16%
RIGGI_EWING_SARCOMA_PROGENITOR_DN	103	0.247914	0.922349	0.561368	0.884635	1	2482	tags=27%, list=23%, signal=35%
BLALOCK_ALZHEIMERS_DISEASE_INCIPIENT_DN	98	0.222358	0.930486	0.561404	0.884429	1	1720	tags=20%, list=16%, signal=24%
KEGG_O_GLYCAN_BIOSYNTHESIS	17	0.317503	0.917553	0.562118	0.883837	1	1454	tags=24%, list=13%, signal=27%
YAO_TEMPORAL_RESPONSE_TO_PROGESTERONE_CLUSTER_8	26	0.27652	0.917051	0.56262	0.884302	1	1704	tags=23%, list=16%, signal=27%
GARGALOVIC_RESPONSE_TO_OXIDIZED_PHOSPHOLIPIDS_YELLOW_UP	23	0.317785	0.921746	0.562992	0.884636	1	2413	tags=35%, list=22%, signal=45%
REACTOME_ABC_FAMILY_PROTEINS_MEDIATED_TRANSPORT	19	0.292287	0.923924	0.564202	0.886524	1	1316	tags=26%, list=12%, signal=30%
LINDGREN_BLADDER_CANCER_CLUSTER_3_UP	184	0.226154	0.853287	0.564961	0.92182	1	3532	tags=39%, list=33%, signal=57%
REACTOME_AUTODEGRADATION_OF_CDH1_BY_CDH1_APC_C	32	0.3125	0.88123	0.565032	0.908188	1	3865	tags=50%, list=36%, signal=78%
BOYLAN_MULTIPLE_MYELOMA_C_CLUSTER_DN	19	0.296451	0.909176	0.56513	0.895668	1	1289	tags=26%, list=12%, signal=30%
TIEN_INTESTINE_PROBIOTICS_24HR_UP	321	0.211185	0.880126	0.565657	0.906685	1	3152	tags=31%, list=29%, signal=42%
PID_AJDISS_2PATHWAY	30	0.272408	0.920412	0.566731	0.882138	1	3248	tags=37%, list=30%, signal=52%
DOUGLAS_BMI1_TARGETS_DN	182	0.205065	0.923416	0.567194	0.887061	1	2600	tags=24%, list=24%, signal=31%
REACTOME_SIGNAL_AMPLIFICATION	24	0.277818	0.920165	0.567568	0.882031	1	2605	tags=33%, list=24%, signal=44%
FRASOR_RESPONSE_TO_ESTRADIOL_DN	45	0.243663	0.929434	0.567619	0.884087	1	1708	tags=22%, list=16%, signal=26%
ZHAN_V1_LATE_DIFFERENTIATION_GENES_UP	20	0.318552	0.905573	0.569959	0.898374	1	1695	tags=25%, list=16%, signal=30%
BACOLOD_RESISTANCE_TO_ALKYLATING_AGENTS_UP	15	0.339353	0.905056	0.570526	0.896775	1	3016	tags=47%, list=28%, signal=65%
HINATA_NFKB_TARGETS_KERATINOCYTE_DN	19	0.319857	0.87953	0.570552	0.906048	1	1790	tags=32%, list=17%, signal=38%
PID_REELIN_PATHWAY	16	0.311508	0.894085	0.571429	0.899595	1	2607	tags=38%, list=24%, signal=49%
REACTOME_CYTOCHROME_P450_ARRANGED_BY_SUBSTRATE_TYPE	30	0.339338	0.90996	0.571705	0.896586	1	1494	tags=27%, list=14%, signal=31%
RAY_TUMORIGENESIS_BY_ERBB2_CDC25A_DN	88	0.229961	0.90967	0.572008	0.895893	1	2996	tags=34%, list=28%, signal=47%
PETROVA_PROX1_TARGETS_DN	44	0.266134	0.903749	0.572917	0.895732	1	3716	tags=41%, list=34%, signal=62%
BROWNE_HCMV_INFECTION_12HR_DN	54	0.229355	0.901167	0.573643	0.896205	1	2404	tags=28%, list=22%, signal=36%
REACTOME_THROMBIN_SIGNALLING_THROUGH_PROTEINASE_ACTIVATED_RECEPTORS_PARS	23	0.279853	0.903875	0.574	0.896788	1	2605	tags=30%, list=24%, signal=40%
MURAKAMI_UV_RESPONSE_6HR_DN	17	0.318305	0.899437	0.57485	0.896132	1	755	tags=18%, list=7%, signal=19%
KEGG_COMPLEMENT_AND_COAGULATION_CASCADES	42	0.313515	0.898127	0.575049	0.896498	1	2141	tags=33%, list=20%, signal=41%
KOKKINAKIS_METHIONINE_DEPRIVATION_96HR_DN	51	0.235952	0.90512	0.575884	0.897317	1	4372	tags=51%, list=40%, signal=85%
CERVERA_SDHB_TARGETS_2	60	0.251353	0.89555	0.576065	0.899635	1	2311	tags=30%, list=21%, signal=38%
ZHAN_MULTIPLE_MYELOMA_PR_DN	25	0.305665	0.901144	0.576402	0.895586	1	2014	tags=32%, list=19%, signal=39%
REN_ALVEOLAR_RHABDOMYOSARCOMA_DN	232	0.232523	0.868403	0.577342	0.910288	1	3485	tags=37%, list=32%, signal=53%
REACTOME_SIGNALLING_TO_ERKS	22	0.275456	0.898029	0.577438	0.896079	1	2661	tags=32%, list=25%, signal=42%
REACTOME_AMINE_LIGAND_BINDING_RECEPTORS	21	0.312912	0.90805	0.578288	0.896212	1	761	tags=14%, list=7%, signal=15%
KATSANOU_ELAVL1_TARGETS_DN	93	0.216664	0.926117	0.578512	0.884883	1	3455	tags=38%, list=32%, signal=55%
SILIGAN_BOUND_BY_EWS_FLT1_FUSION	28	0.275861	0.9168	0.579151	0.884223	1	1000	tags=21%, list=9%, signal=24%
PEREZ_TP63_TARGETS	195	0.220608	0.912845	0.579654	0.891371	1	2114	tags=24%, list=20%, signal=29%
PID_IL2_PI3K_PATHWAY	17	0.301618	0.904048	0.579798	0.89775	1	2626	tags=35%, list=24%, signal=47%
PID_AURORA_A_PATHWAY	24	0.296689	0.876274	0.580517	0.908693	1	1252	tags=17%, list=12%, signal=19%
REACTOME_CELL_CELL_JUNCTION_ORGANIZATION	28	0.282662	0.902093	0.580827	0.896806	1	1008	tags=18%, list=9%, signal=20%
YU_MYC_TARGETS_UP	23	0.369543	0.867046	0.582178	0.91069	1	1999	tags=35%, list=18%, signal=43%
TARTE_PLASMA_CELL_VS_PLASMABLAST_DN	186	0.220878	0.83796	0.583162	0.926784	1	2258	tags=24%, list=21%, signal=29%
REACTOME_NRAGE_SIGNALS_DEATH_THROUGH_JNK	25	0.29626	0.908345	0.583493	0.896154	1	3095	tags=44%, list=29%, signal=61%
DAUER_STAT3_TARGETS_DN	27	0.333756	0.866775	0.584158	0.910622	1	3253	tags=33%, list=30%, signal=48%
ELVIDGE_HYPOXIA_DN	79	0.232422	0.863924	0.584337	0.91232	1	3521	tags=32%, list=33%, signal=47%
PID_AURORA_B_PATHWAY	22	0.332626	0.894201	0.584466	0.899982	1	2603	tags=36%, list=24%, signal=48%
PID_FOXM1_PATHWAY	28	0.291153	0.886515	0.585366	0.904404	1	1731	tags=21%, list=16%, signal=25%
POOLA_INVASIVE_BREAST_CANCER_DN	77	0.235749	0.922866	0.585413	0.885547	1	1708	tags=26%, list=16%, signal=31%
OHGUCHI_LIVER_HNF4A_TARGETS_DN	76	0.244303	0.909459	0.585513	0.895715	1	2302	tags=24%, list=21%, signal=30%
SCIAN_CELL_CYCLE_TARGETS_OF_TP53_AND_TP73_DN	17	0.380054	0.883861	0.585513	0.908358	1	4017	tags=65%, list=37%, signal=103%
DELACROIX_RARG_BOUND_MEF	235	0.205398	0.921348	0.585714	0.884824	1	1941	tags=21%, list=18%, signal=25%
SU_PANCREAS	29	0.276634	0.906921	0.586139	0.897375	1	897	tags=17%, list=8%, signal=19%
PODAR_RESPONSE_TO_ADAPHOSTIN_UP	90	0.218664	0.880453	0.586207	0.906614	1	2780	tags=28%, list=26%, signal=37%
LINDGREN_BLADDER_CANCER_HIGH_RECURRENCE	30	0.28892	0.891244	0.586614	0.901809	1	1248	tags=23%, list=12%, signal=26%
SESTO_RESPONSE_TO_UV_C2	33	0.268635	0.882555	0.586745	0.909224	1	2290	tags=24%, list=21%, signal=31%
REACTOME_SCFSKP2_MEDIATED_DEGRADATION_OF_P27_P21	32	0.295547	0.829631	0.587002	0.929939	1	3865	tags=47%, list=36%, signal=73%
IVANOVA_HEMATOPOIESIS_MATURE_CELL	156	0.198188	0.931411	0.587771	0.885829	1	2065	tags=22%, list=19%, signal=27%
MORI_PLASMA_CELL_UP	29	0.280579	0.864332	0.587866	0.912692	1	2340	tags=34%, list=22%, signal=44%
BHAT_ESR1_TARGETS_NOT_VIA_AKT1_UP	123	0.234282	0.899118	0.587879	0.895553	1	2912	tags=31%, list=27%, signal=42%
KEGG_PURINE_METABOLISM	82	0.219006	0.906366	0.588235	0.897939	1	3618	tags=39%, list=33%, signal=58%
DER_IFN_ALPHA_RESPONSE_UP	41	0.287393	0.853146	0.588608	0.920832	1	1264	tags=20%, list=12%, signal=22%
REACTOME_FORMATION_OF_TUBULIN_FOLDING_INTERMEDIATES_BY_CCT_TRIC	15	0.336994	0.858765	0.589796	0.91537	1	948	tags=27%, list=9%, signal=29%
PUJANA_BRCA_CENTERED_NETWORK	65	0.299486	0.859814	0.590457	0.915651	1	3474	tags=42%, list=32%, signal=61%
PID_RB_1PATHWAY	45	0.245744	0.898649	0.591356	0.895976	1	1891	tags=27%, list=17%, signal=32%
KYNG_DNA_DAMAGE_UP	141	0.198352	0.934841	0.591797	0.883517	1	3128	tags=34%, list=29%, signal=47%
PENG_LEUCINE_DEPRIVATION_UP	74	0.222567	0.900465	0.59205	0.894454	1	3222	tags=34%, list=30%, signal=48%
KAN_RESPONSE_TO_ARSENIC_TRIOXIDE	74	0.232867	0.887786	0.59205	0.902882	1	3309	tags=39%, list=31%, signal=56%
DARWICHE_SQUAMOUS_CELL_CARCINOMA_DN	93	0.203509	0.928437	0.592668	0.882908	1	2250	tags=23%, list=21%, signal=28%
DANG_MYC_TARGETS_DN	17	0.321114	0.907012	0.593626	0.89788	1	2253	tags=35%, list=21%, signal=44%
WANG_RESPONSE_TO_ANDROGEN_UP	17	0.312072	0.901998	0.593814	0.896324	1	3142	tags=41%, list=29%, signal=58%
REACTOME_HIV_INFECTION	93	0.231002	0.871806	0.594203	0.909401	1	3271	tags=34%, list=30%, signal=49%
STEARMAN_TUMOR_FIELD_EFFECT_UP	20	0.306774	0.862124	0.594433	0.914337	1	534	tags=15%, list=5%, signal=16%
GRADE_COLON_AND_RECTAL_CANCER_DN	63	0.231724	0.903769	0.595506	0.896358	1	1409	tags=16%, list=13%, signal=18%
RAO_BOUND_BY_SALL4_ISOFORM_B	304	0.211874	0.913744	0.595703	0.890616	1	3247	tags=34%, list=30%, signal=47%
ACEVEDO_LIVER_CANCER_WITH_H3K9ME3_DN	64	0.230085	0.889763	0.596899	0.902422	1	1713	tags=20%, list=16%, signal=24%
SMID_BREAST_CANCER_LUMINAL_B_UP	99	0.212628	0.930069	0.596958	0.883992	1	1115	tags=14%, list=10%, signal=16%
MULLIGHAN_MLL_SIGNATURE_2_DN	141	0.194762	0.920481	0.597166	0.882649	1	3156	tags=32%, list=29%, signal=44%
IZADPANAH_STEM_CELL_ADIPOSE_VS_BONE_DN	68	0.243127	0.874976	0.597276	0.90823	1	906	tags=16%, list=8%, signal=18%
KEGG_ADIPOCYTOKINE_SIGNALING_PATHWAY	39	0.255899	0.892695	0.599174	0.899965	1	2610	tags=36%, list=24%, signal=47%
STARK_PREFRONTAL_CORTEX_22Q11_DELETION_UP	109	0.227026	0.889673	0.599251	0.900657	1	2137	tags=21%, list=20%, signal=26%
BROWNE_HCMV_INFECTION_20HR_UP	138	0.197922	0.918939	0.599606	0.882768	1	2876	tags=26%, list=27%, signal=35%
DELACROIX_RAR_BOUND_ES	268	0.188924	0.927906	0.6	0.883408	1	2802	tags=27%, list=26%, signal=36%
BROWNE_HCMV_INFECTION_14HR_UP	95	0.21064	0.882096	0.6	0.908232	1	4318	tags=54%, list=40%, signal=89%
KAMMINGA_EZH2_TARGETS	28	0.345732	0.870049	0.600807	0.909327	1	4017	tags=57%, list=37%, signal=91%
WANG_CISPLATIN_RESPONSE_AND_XPC_UP	118	0.215002	0.891273	0.60119	0.902408	1	3566	tags=42%, list=33%, signal=61%
GALLUZZI_PERMEABILIZE_MITOCHONDRIA	25	0.26175	0.882087	0.601227	0.907587	1	2366	tags=28%, list=22%, signal=36%
CAIRO_PML_TARGETS_BOUND_BY_MYC_UP	15	0.323574	0.877555	0.601227	0.90721	1	975	tags=20%, list=9%, signal=22%
PENG_GLUCOSE_DEPRIVATION_UP	26	0.283782	0.870485	0.60124	0.909093	1	2763	tags=38%, list=26%, signal=52%
TAKEDA_TARGETS_OF_NUP98_HOXA9_FUSION_6HR_DN	25	0.264517	0.881122	0.601504	0.907757	1	3447	tags=52%, list=32%, signal=76%
WANG_METASTASIS_OF_BREAST_CANCER_ESR1_DN	19	0.278916	0.875854	0.603774	0.908885	1	3578	tags=42%, list=33%, signal=63%
REN_ALVEOLAR_RHABDOMYOSARCOMA_UP	55	0.286989	0.903216	0.60404	0.8963	1	1278	tags=22%, list=12%, signal=25%
MCBRYAN_PUBERTAL_BREAST_4_5WK_UP	164	0.233537	0.882252	0.605058	0.908557	1	2196	tags=27%, list=20%, signal=34%
GENTILE_UV_RESPONSE_CLUSTER_D9	20	0.288833	0.894056	0.605578	0.898988	1	1767	tags=25%, list=16%, signal=30%
VECCHI_GASTRIC_CANCER_EARLY_UP	252	0.218022	0.8403	0.605578	0.927408	1	3533	tags=38%, list=33%, signal=55%
OKAMOTO_LIVER_CANCER_MULTICENTRIC_OCCURRENCE_UP	18	0.302311	0.874049	0.605714	0.907062	1	3681	tags=61%, list=34%, signal=92%
WHITFIELD_CELL_CYCLE_G2_M	122	0.21965	0.87092	0.606061	0.909424	1	3465	tags=37%, list=32%, signal=54%
CAVARD_LIVER_CANCER_MALIGNANT_VS_BENIGN	17	0.333454	0.875671	0.606238	0.907351	1	1198	tags=24%, list=11%, signal=26%
SANSOM_APC_TARGETS	114	0.198694	0.913479	0.606557	0.890503	1	3452	tags=39%, list=32%, signal=57%
VANTVEER_BREAST_CANCER_METASTASIS_DN	66	0.262038	0.828823	0.607921	0.930351	1	2807	tags=32%, list=26%, signal=43%
AMUNDSON_POOR_SURVIVAL_AFTER_GAMMA_RADIATION_2G	93	0.209397	0.912776	0.608779	0.890857	1	2231	tags=27%, list=21%, signal=34%
REACTOME_PI3K_EVENTS_IN_ERBB2_SIGNALING	22	0.277364	0.878521	0.608871	0.906282	1	1627	tags=18%, list=15%, signal=21%
YAMASHITA_LIVER_CANCER_STEM_CELL_DN	43	0.299625	0.890764	0.609218	0.901521	1	2168	tags=28%, list=20%, signal=35%
WINTER_HYPOXIA_UP	47	0.260005	0.848009	0.610101	0.921052	1	3309	tags=43%, list=31%, signal=61%
PICCALUGA_ANGIOIMMUNOBLASTIC_LYMPHOMA_DN	73	0.258062	0.874151	0.610136	0.907471	1	2683	tags=33%, list=25%, signal=43%
REACTOME_SEMAPHORIN_INTERACTIONS	36	0.25805	0.890921	0.610338	0.901825	1	2548	tags=28%, list=24%, signal=36%
KEGG_TIGHT_JUNCTION	74	0.221243	0.906006	0.610417	0.898066	1	2606	tags=28%, list=24%, signal=37%
REACTOME_M_G1_TRANSITION	44	0.286597	0.848255	0.611227	0.921766	1	3865	tags=48%, list=36%, signal=74%
DASU_IL6_SIGNALING_UP	39	0.267735	0.87336	0.611452	0.907936	1	3958	tags=44%, list=37%, signal=68%
HU_GENOTOXIN_ACTION_DIRECT_VS_INDIRECT_4HR	21	0.279885	0.889678	0.612121	0.901299	1	2608	tags=38%, list=24%, signal=50%
BHATTACHARYA_EMBRYONIC_STEM_CELL	53	0.252835	0.84082	0.612205	0.926943	1	1804	tags=25%, list=17%, signal=29%
BECKER_TAMOXIFEN_RESISTANCE_UP	27	0.274387	0.874716	0.6125	0.908127	1	2763	tags=41%, list=26%, signal=55%
KEGG_ABC_TRANSPORTERS	23	0.273808	0.894551	0.613281	0.899839	1	1316	tags=22%, list=12%, signal=25%
HU_GENOTOXIC_DAMAGE_4HR	22	0.320256	0.848662	0.613546	0.922774	1	3650	tags=50%, list=34%, signal=75%
PID_RAC1_PATHWAY	35	0.240269	0.884711	0.613821	0.907102	1	3289	tags=37%, list=30%, signal=53%
NUYTTEN_NIPP1_TARGETS_DN	500	0.185693	0.893463	0.614314	0.898944	1	3558	tags=35%, list=33%, signal=50%
MULLIGHAN_MLL_SIGNATURE_1_DN	122	0.201757	0.919634	0.61523	0.882566	1	2847	tags=30%, list=26%, signal=41%
DARWICHE_SQUAMOUS_CELL_CARCINOMA_UP	75	0.228361	0.871232	0.616352	0.909384	1	3478	tags=36%, list=32%, signal=53%
HELLER_HDAC_TARGETS_UP	174	0.201939	0.888427	0.616438	0.902118	1	2738	tags=30%, list=25%, signal=40%
HAHTOLA_CTCL_CUTANEOUS	16	0.291069	0.882923	0.618257	0.909123	1	2387	tags=25%, list=22%, signal=32%
COATES_MACROPHAGE_M1_VS_M2_DN	41	0.229808	0.875779	0.620123	0.908416	1	2216	tags=29%, list=20%, signal=37%
ZHU_CMV_24_HR_DN	62	0.25592	0.86131	0.621242	0.914228	1	1575	tags=23%, list=15%, signal=26%
LI_CISPLATIN_RESISTANCE_DN	21	0.302048	0.874416	0.621622	0.907516	1	1348	tags=24%, list=12%, signal=27%
CHIARADONNA_NEOPLASTIC_TRANSFORMATION_KRAS_CDC25_DN	28	0.289134	0.86861	0.621677	0.910479	1	1785	tags=29%, list=16%, signal=34%
JIANG_HYPOXIA_NORMAL	184	0.191478	0.90985	0.621795	0.89613	1	3321	tags=33%, list=31%, signal=47%
MASSARWEH_TAMOXIFEN_RESISTANCE_DN	143	0.206759	0.900587	0.621832	0.894859	1	2928	tags=34%, list=27%, signal=45%
YIH_RESPONSE_TO_ARSENITE_C3	16	0.296625	0.876906	0.621849	0.908008	1	4005	tags=44%, list=37%, signal=69%
MARTINEZ_RESPONSE_TO_TRABECTEDIN_UP	38	0.254023	0.856433	0.623218	0.91707	1	2349	tags=34%, list=22%, signal=44%
MIKKELSEN_ES_ICP_WITH_H3K4ME3	388	0.187033	0.920784	0.623457	0.882661	1	2190	tags=23%, list=20%, signal=28%
CREIGHTON_ENDOCRINE_THERAPY_RESISTANCE_3	402	0.195298	0.900685	0.624016	0.895308	1	2631	tags=27%, list=24%, signal=34%
CASORELLI_ACUTE_PROMYELOCYTIC_LEUKEMIA_UP	81	0.226754	0.879743	0.624266	0.906281	1	3306	tags=41%, list=31%, signal=58%
KAYO_CALORIE_RESTRICTION_MUSCLE_DN	53	0.226808	0.890371	0.624738	0.901695	1	2122	tags=26%, list=20%, signal=33%
ONDER_CDH1_SIGNALING_VIA_CTNNB1	45	0.268482	0.857994	0.625	0.915684	1	666	tags=16%, list=6%, signal=17%
NAKAYAMA_SOFT_TISSUE_TUMORS_PCA2_UP	53	0.257752	0.839251	0.626186	0.927846	1	2375	tags=28%, list=22%, signal=36%
REACTOME_ADP_SIGNALLING_THROUGH_P2RY12	15	0.301724	0.864775	0.626243	0.912355	1	3010	tags=47%, list=28%, signal=65%
REACTOME_S_PHASE	63	0.273085	0.839712	0.626283	0.928079	1	3970	tags=48%, list=37%, signal=75%
JOHANSSON_GLIOMAGENESIS_BY_PDGFB_UP	36	0.257536	0.889737	0.626305	0.901823	1	2650	tags=31%, list=24%, signal=40%
REACTOME_SIGNALING_BY_SCF_KIT	42	0.236803	0.88191	0.627049	0.907351	1	2607	tags=29%, list=24%, signal=37%
WEI_MIR34A_TARGETS	99	0.224345	0.886782	0.627151	0.904487	1	2208	tags=23%, list=20%, signal=29%
KAUFFMANN_MELANOMA_RELAPSE_UP	31	0.315264	0.814002	0.627639	0.933719	1	3762	tags=45%, list=35%, signal=69%
GHANDHI_BYSTANDER_IRRADIATION_UP	49	0.257981	0.844378	0.627907	0.925049	1	2328	tags=29%, list=21%, signal=36%
REACTOME_ORC1_REMOVAL_FROM_CHROMATIN	37	0.288639	0.830266	0.62845	0.930494	1	3865	tags=46%, list=36%, signal=71%
PID_ATF2_PATHWAY	33	0.259309	0.873133	0.629139	0.907174	1	3437	tags=45%, list=32%, signal=66%
BROWNE_HCMV_INFECTION_20HR_DN	55	0.24132	0.883838	0.630058	0.907752	1	1722	tags=20%, list=16%, signal=24%
MARKEY_RB1_ACUTE_LOF_UP	131	0.239924	0.820047	0.630219	0.932608	1	3503	tags=39%, list=32%, signal=57%
BERTUCCI_INVASIVE_CARCINOMA_DUCTAL_VS_LOBULAR_DN	25	0.279839	0.850581	0.63039	0.92247	1	1840	tags=28%, list=17%, signal=34%
PEDERSEN_METASTASIS_BY_ERBB2_ISOFORM_1	28	0.286552	0.848697	0.631048	0.92333	1	1191	tags=25%, list=11%, signal=28%
LEIN_CEREBELLUM_MARKERS	54	0.229157	0.902302	0.63138	0.897014	1	2531	tags=31%, list=23%, signal=41%
REACTOME_VIF_MEDIATED_DEGRADATION_OF_APOBEC3G	28	0.295336	0.797216	0.631799	0.938439	1	3865	tags=50%, list=36%, signal=78%
DAIRKEE_TERT_TARGETS_DN	74	0.221294	0.893683	0.63189	0.899107	1	3196	tags=34%, list=30%, signal=48%
JAZAG_TGFB1_SIGNALING_DN	18	0.300449	0.844245	0.632054	0.92473	1	887	tags=17%, list=8%, signal=18%
HUPER_BREAST_BASAL_VS_LUMINAL_DN	41	0.262636	0.881047	0.632114	0.907265	1	4103	tags=49%, list=38%, signal=78%
WANG_CLIM2_TARGETS_DN	94	0.218819	0.842533	0.63301	0.925819	1	4063	tags=47%, list=38%, signal=74%
LINDGREN_BLADDER_CANCER_CLUSTER_1_UP	68	0.239247	0.860975	0.633065	0.914339	1	2964	tags=32%, list=27%, signal=44%
BOYLAN_MULTIPLE_MYELOMA_C_CLUSTER_UP	23	0.269202	0.879038	0.633136	0.90583	1	2316	tags=26%, list=21%, signal=33%
SCHUETZ_BREAST_CANCER_DUCTAL_INVASIVE_DN	55	0.240464	0.852109	0.633803	0.922415	1	2114	tags=27%, list=20%, signal=34%
HOSHIDA_LIVER_CANCER_LATE_RECURRENCE_UP	32	0.247141	0.864317	0.634343	0.912082	1	1510	tags=25%, list=14%, signal=29%
DITTMER_PTHLH_TARGETS_DN	47	0.234235	0.880035	0.634497	0.906244	1	2607	tags=28%, list=24%, signal=36%
SHIPP_DLBCL_VS_FOLLICULAR_LYMPHOMA_UP	27	0.302025	0.82816	0.634855	0.929206	1	4334	tags=56%, list=40%, signal=92%
ZIRN_TRETINOIN_RESPONSE_UP	15	0.308044	0.839098	0.635827	0.926925	1	3147	tags=40%, list=29%, signal=56%
NAKAMURA_ADIPOGENESIS_LATE_DN	22	0.290869	0.867524	0.636364	0.910282	1	1578	tags=23%, list=15%, signal=27%
GROSS_ELK3_TARGETS_UP	19	0.278451	0.868966	0.636727	0.910347	1	1698	tags=32%, list=16%, signal=37%
REACTOME_GABA_B_RECEPTOR_ACTIVATION	23	0.27041	0.884938	0.638037	0.90725	1	2605	tags=43%, list=24%, signal=57%
KEGG_AXON_GUIDANCE	84	0.218109	0.849957	0.638075	0.922473	1	2654	tags=25%, list=25%, signal=33%
REACTOME_CDT1_ASSOCIATION_WITH_THE_CDC6_ORC_ORIGIN_COMPLEX	31	0.294396	0.816463	0.638298	0.932419	1	4537	tags=61%, list=42%, signal=105%
GRESHOCK_CANCER_COPY_NUMBER_UP	184	0.200208	0.897776	0.64	0.895986	1	3176	tags=32%, list=29%, signal=44%
OUELLET_CULTURED_OVARIAN_CANCER_INVASIVE_VS_LMP_DN	17	0.296807	0.873311	0.640244	0.907405	1	2463	tags=35%, list=23%, signal=46%
PID_AR_TF_PATHWAY	31	0.262142	0.849346	0.640684	0.923214	1	3610	tags=39%, list=33%, signal=58%
LEE_CALORIE_RESTRICTION_NEOCORTEX_DN	40	0.245227	0.877798	0.640873	0.907288	1	3600	tags=50%, list=33%, signal=75%
PEREZ_TP53_AND_TP63_TARGETS	123	0.224539	0.865092	0.641026	0.912939	1	2445	tags=27%, list=23%, signal=34%
KYNG_WERNER_SYNDROM_AND_NORMAL_AGING_DN	133	0.193386	0.902544	0.641075	0.897124	1	2293	tags=24%, list=21%, signal=30%
RADAEVA_RESPONSE_TO_IFNA1_UP	31	0.305619	0.819526	0.641079	0.931848	1	3040	tags=39%, list=28%, signal=54%
PID_FANCONI_PATHWAY	28	0.299611	0.82974	0.6417	0.930318	1	1347	tags=18%, list=12%, signal=20%
SOTIRIOU_BREAST_CANCER_GRADE_1_VS_3_UP	88	0.298153	0.79408	0.643145	0.938071	1	4025	tags=52%, list=37%, signal=83%
WANG_BARRETTS_ESOPHAGUS_UP	20	0.286738	0.861592	0.643443	0.9142	1	1574	tags=25%, list=15%, signal=29%
REACTOME_SYNTHESIS_OF_DNA	52	0.279263	0.82248	0.643585	0.930219	1	3970	tags=48%, list=37%, signal=76%
WANG_ESOPHAGUS_CANCER_VS_NORMAL_UP	75	0.228946	0.843721	0.644491	0.924586	1	1208	tags=17%, list=11%, signal=19%
BARRIER_CANCER_RELAPSE_NORMAL_SAMPLE_UP	15	0.304445	0.868079	0.645833	0.91031	1	1969	tags=33%, list=18%, signal=41%
KEGG_CYTOSOLIC_DNA_SENSING_PATHWAY	23	0.287611	0.850616	0.646091	0.923025	1	2499	tags=39%, list=23%, signal=51%
LEI_MYB_TARGETS	188	0.222102	0.859387	0.646694	0.915293	1	3495	tags=36%, list=32%, signal=52%
LEE_AGING_NEOCORTEX_UP	57	0.222324	0.86257	0.646817	0.913991	1	2150	tags=25%, list=20%, signal=30%
KEGG_ARACHIDONIC_ACID_METABOLISM	31	0.288277	0.859151	0.646939	0.91519	1	310	tags=13%, list=3%, signal=13%
LEE_BMP2_TARGETS_DN	494	0.208773	0.816453	0.647059	0.931833	1	3252	tags=31%, list=30%, signal=42%
GERHOLD_ADIPOGENESIS_DN	33	0.256318	0.853934	0.649899	0.921112	1	1300	tags=18%, list=12%, signal=21%
REACTOME_ASSOCIATION_OF_TRIC_CCT_WITH_TARGET_PROTEINS_DURING_BIOSYNTHESIS	18	0.286457	0.835534	0.651116	0.928771	1	948	tags=22%, list=9%, signal=24%
DIRMEIER_LMP1_RESPONSE_LATE_DN	17	0.324239	0.817465	0.651992	0.933476	1	2541	tags=41%, list=23%, signal=54%
DAZARD_UV_RESPONSE_CLUSTER_G2	20	0.30607	0.85324	0.652083	0.921289	1	3662	tags=50%, list=34%, signal=75%
REACTOME_G2_M_CHECKPOINTS	28	0.296239	0.769999	0.652174	0.945533	1	4410	tags=50%, list=41%, signal=84%
SHAFFER_IRF4_TARGETS_IN_ACTIVATED_B_LYMPHOCYTE	52	0.235938	0.823749	0.652893	0.928839	1	2639	tags=33%, list=24%, signal=43%
KEGG_GLYCOLYSIS_GLUCONEOGENESIS	36	0.264338	0.830171	0.652977	0.930073	1	2419	tags=33%, list=22%, signal=43%
REACTOME_TRANSCRIPTION	103	0.215096	0.795176	0.653101	0.93722	1	3271	tags=32%, list=30%, signal=45%
REACTOME_INHIBITION_OF_INSULIN_SECRETION_BY_ADRENALINE_NORADRENALINE	18	0.291891	0.869915	0.653923	0.908956	1	3010	tags=44%, list=28%, signal=61%
REACTOME_ANTIGEN_PROCESSING_CROSS_PRESENTATION	45	0.268393	0.774223	0.654886	0.944965	1	4721	tags=64%, list=44%, signal=114%
DELACROIX_RAR_TARGETS_UP	30	0.266499	0.848108	0.655022	0.921464	1	2858	tags=37%, list=26%, signal=50%
REACTOME_DOWNSTREAM_SIGNALING_EVENTS_OF_B_CELL_RECEPTOR_BCR	56	0.24773	0.818675	0.655172	0.932909	1	4537	tags=59%, list=42%, signal=101%
WOOD_EBV_EBNA1_TARGETS_DN	27	0.265035	0.874559	0.655602	0.907825	1	1195	tags=19%, list=11%, signal=21%
CHEMNITZ_RESPONSE_TO_PROSTAGLANDIN_E2_DN	222	0.198198	0.880571	0.656189	0.907671	1	2743	tags=26%, list=25%, signal=34%
LINDGREN_BLADDER_CANCER_CLUSTER_3_DN	129	0.199809	0.88232	0.657201	0.909054	1	1787	tags=21%, list=17%, signal=25%
KEGG_MTOR_SIGNALING_PATHWAY	29	0.242496	0.841921	0.65748	0.92649	1	2607	tags=28%, list=24%, signal=36%
LIU_BREAST_CANCER	17	0.280075	0.862002	0.65896	0.913937	1	817	tags=18%, list=8%, signal=19%
ZHANG_BREAST_CANCER_PROGENITORS_DN	86	0.19802	0.899261	0.66	0.895885	1	2049	tags=20%, list=19%, signal=24%
CREIGHTON_AKT1_SIGNALING_VIA_MTOR_DN	15	0.353396	0.787589	0.660297	0.93961	1	2686	tags=47%, list=25%, signal=62%
HOOI_ST7_TARGETS_DN	60	0.221795	0.858725	0.660714	0.914816	1	2997	tags=37%, list=28%, signal=50%
SERVITJA_ISLET_HNF1A_TARGETS_DN	62	0.232341	0.879323	0.660784	0.90585	1	2324	tags=31%, list=21%, signal=39%
CHANG_IMMORTALIZED_BY_HPV31_UP	39	0.248298	0.865143	0.661448	0.91346	1	2877	tags=33%, list=27%, signal=45%
LIU_VAV3_PROSTATE_CARCINOGENESIS_UP	51	0.242392	0.808504	0.661972	0.935457	1	2773	tags=41%, list=26%, signal=55%
REACTOME_TIGHT_JUNCTION_INTERACTIONS	15	0.315286	0.834262	0.662083	0.929499	1	950	tags=20%, list=9%, signal=22%
KESHELAVA_MULTIPLE_DRUG_RESISTANCE	47	0.231409	0.827351	0.6625	0.928455	1	2172	tags=28%, list=20%, signal=34%
YAMASHITA_LIVER_CANCER_STEM_CELL_UP	29	0.257687	0.87053	0.662577	0.909635	1	3849	tags=45%, list=36%, signal=69%
VERRECCHIA_DELAYED_RESPONSE_TO_TGFB1	22	0.270447	0.830986	0.664078	0.930161	1	820	tags=14%, list=8%, signal=15%
DACOSTA_UV_RESPONSE_VIA_ERCC3_XPCS_DN	52	0.254648	0.81153	0.664093	0.93432	1	3578	tags=40%, list=33%, signal=60%
KIM_WT1_TARGETS_8HR_DN	72	0.207628	0.888431	0.664683	0.90277	1	2432	tags=26%, list=22%, signal=34%
FARMER_BREAST_CANCER_CLUSTER_2	20	0.348799	0.779744	0.664717	0.942052	1	4132	tags=55%, list=38%, signal=89%
BEGUM_TARGETS_OF_PAX3_FOXO1_FUSION_UP	38	0.269983	0.838686	0.665331	0.926509	1	3731	tags=50%, list=34%, signal=76%
KAMIKUBO_MYELOID_CEBPA_NETWORK	16	0.322568	0.824686	0.666	0.927618	1	3187	tags=50%, list=29%, signal=71%
MATZUK_MEIOTIC_AND_DNA_REPAIR	28	0.255388	0.871304	0.666667	0.909877	1	3007	tags=32%, list=28%, signal=44%
PID_DELTA_NP63_PATHWAY	26	0.262148	0.841368	0.667368	0.926393	1	2111	tags=27%, list=19%, signal=33%
HAHTOLA_MYCOSIS_FUNGOIDES_SKIN_UP	107	0.199584	0.86793	0.667969	0.910002	1	1759	tags=19%, list=16%, signal=22%
IVANOVA_HEMATOPOIESIS_STEM_CELL_LONG_TERM	170	0.195045	0.895053	0.669276	0.899403	1	2041	tags=22%, list=19%, signal=27%
JISON_SICKLE_CELL_DISEASE_UP	114	0.221027	0.826746	0.670041	0.928401	1	3282	tags=38%, list=30%, signal=54%
YAGI_AML_FAB_MARKERS	106	0.197353	0.859568	0.670683	0.91554	1	2491	tags=28%, list=23%, signal=36%
FIGUEROA_AML_METHYLATION_CLUSTER_1_DN	22	0.269801	0.85755	0.670808	0.915386	1	324	tags=14%, list=3%, signal=14%
FERNANDEZ_BOUND_BY_MYC	106	0.204849	0.857717	0.67161	0.915664	1	2611	tags=28%, list=24%, signal=37%
REACTOME_RNA_POL_III_TRANSCRIPTION	15	0.3099	0.833042	0.672381	0.928964	1	4021	tags=47%, list=37%, signal=74%
DURAND_STROMA_S_UP	168	0.20277	0.825838	0.672414	0.928994	1	3049	tags=30%, list=28%, signal=42%
NAKAYAMA_FRA2_TARGETS	28	0.248047	0.823541	0.673704	0.92868	1	704	tags=14%, list=7%, signal=15%
MCBRYAN_PUBERTAL_TGFB1_TARGETS_UP	108	0.209566	0.847519	0.674603	0.920231	1	2366	tags=24%, list=22%, signal=30%
JAZAERI_BREAST_CANCER_BRCA1_VS_BRCA2_UP	30	0.264076	0.813509	0.674948	0.93404	1	1332	tags=20%, list=12%, signal=23%
WESTON_VEGFA_TARGETS_12HR	22	0.29499	0.851671	0.675	0.922699	1	1840	tags=27%, list=17%, signal=33%
GNATENKO_PLATELET_SIGNATURE	29	0.260036	0.792213	0.675456	0.937468	1	2484	tags=28%, list=23%, signal=36%
REACTOME_DOUBLE_STRAND_BREAK_REPAIR	15	0.313173	0.83208	0.67551	0.929746	1	4304	tags=67%, list=40%, signal=110%
YANG_BREAST_CANCER_ESR1_BULK_UP	17	0.272797	0.827778	0.676659	0.928767	1	1316	tags=24%, list=12%, signal=27%
MIKKELSEN_MEF_LCP_WITH_H3K4ME3	62	0.23329	0.825601	0.678	0.92887	1	1326	tags=16%, list=12%, signal=18%
LEIN_OLIGODENDROCYTE_MARKERS	43	0.233017	0.833575	0.678423	0.928474	1	3037	tags=35%, list=28%, signal=48%
ST_PHOSPHOINOSITIDE_3_KINASE_PATHWAY	26	0.246553	0.851237	0.679513	0.923004	1	815	tags=12%, list=8%, signal=12%
REACTOME_P53_INDEPENDENT_G1_S_DNA_DAMAGE_CHECKPOINT	29	0.277408	0.766523	0.68125	0.947037	1	4537	tags=59%, list=42%, signal=101%
DAZARD_RESPONSE_TO_UV_NHEK_DN	173	0.213044	0.772879	0.681733	0.943345	1	4142	tags=47%, list=38%, signal=75%
PID_AP1_PATHWAY	42	0.239809	0.836153	0.681913	0.928121	1	3610	tags=40%, list=33%, signal=60%
CASTELLANO_NRAS_TARGETS_UP	39	0.239879	0.825477	0.682093	0.928509	1	2056	tags=23%, list=19%, signal=28%
VERNELL_RETINOBLASTOMA_PATHWAY_UP	44	0.281426	0.773279	0.682446	0.943233	1	3502	tags=41%, list=32%, signal=60%
SETLUR_PROSTATE_CANCER_TMPRSS2_ERG_FUSION_UP	36	0.21781	0.821588	0.68254	0.931386	1	3461	tags=42%, list=32%, signal=61%
REACTOME_LOSS_OF_NLP_FROM_MITOTIC_CENTROSOMES	32	0.252069	0.820164	0.682692	0.93297	1	1936	tags=22%, list=18%, signal=27%
MULLIGHAN_NPM1_MUTATED_SIGNATURE_1_DN	74	0.216649	0.828257	0.683884	0.929667	1	3217	tags=34%, list=30%, signal=48%
REACTOME_THROMBOXANE_SIGNALLING_THROUGH_TP_RECEPTOR	17	0.276908	0.838741	0.684418	0.927016	1	3010	tags=41%, list=28%, signal=57%
CORRE_MULTIPLE_MYELOMA_UP	44	0.23521	0.841874	0.688363	0.92596	1	2578	tags=30%, list=24%, signal=39%
HARRIS_BRAIN_CANCER_PROGENITORS	24	0.268773	0.821249	0.689189	0.931447	1	3373	tags=38%, list=31%, signal=54%
REACTOME_CROSS_PRESENTATION_OF_SOLUBLE_EXOGENOUS_ANTIGENS_ENDOSOMES	28	0.283196	0.755276	0.6893	0.94881	1	3865	tags=54%, list=36%, signal=83%
BIOCARTA_RAS_PATHWAY	16	0.270682	0.795137	0.690574	0.936725	1	4331	tags=56%, list=40%, signal=94%
REACTOME_PACKAGING_OF_TELOMERE_ENDS	27	0.283293	0.749713	0.690619	0.951356	1	2753	tags=33%, list=25%, signal=45%
BIDUS_METASTASIS_UP	122	0.240557	0.757175	0.691262	0.948962	1	3596	tags=41%, list=33%, signal=61%
MCLACHLAN_DENTAL_CARIES_DN	45	0.250264	0.828482	0.691571	0.930447	1	3455	tags=44%, list=32%, signal=65%
KOHOUTEK_CCNT1_TARGETS	28	0.269892	0.812879	0.691684	0.933417	1	1895	tags=21%, list=18%, signal=26%
KEGG_UBIQUITIN_MEDIATED_PROTEOLYSIS	79	0.20596	0.846966	0.6917	0.92015	1	3465	tags=39%, list=32%, signal=57%
HAHTOLA_MYCOSIS_FUNGOIDES_CD4_UP	37	0.256723	0.837131	0.69181	0.927934	1	3864	tags=51%, list=36%, signal=80%
ST_JNK_MAPK_PATHWAY	21	0.262049	0.848806	0.691992	0.923712	1	3011	tags=33%, list=28%, signal=46%
REACTOME_REGULATION_OF_ORNITHINE_DECARBOXYLASE_ODC	29	0.275559	0.757579	0.692469	0.948853	1	3865	tags=45%, list=36%, signal=70%
BURTON_ADIPOGENESIS_9	59	0.223517	0.836592	0.692771	0.928412	1	1688	tags=20%, list=16%, signal=24%
TOOKER_GEMCITABINE_RESISTANCE_UP	43	0.230418	0.790708	0.693252	0.937394	1	1264	tags=19%, list=12%, signal=21%
PID_AMB2_NEUTROPHILS_PATHWAY	22	0.287853	0.819647	0.693548	0.932222	1	2284	tags=27%, list=21%, signal=34%
REACTOME_PHASE1_FUNCTIONALIZATION_OF_COMPOUNDS	35	0.307565	0.817179	0.693798	0.932844	1	1494	tags=26%, list=14%, signal=30%
NABA_PROTEOGLYCANS	20	0.326491	0.860419	0.694118	0.91493	1	804	tags=20%, list=7%, signal=22%
JAZAG_TGFB1_SIGNALING_VIA_SMAD4_UP	60	0.219975	0.847391	0.694332	0.919873	1	3440	tags=35%, list=32%, signal=51%
MIKKELSEN_ES_LCP_WITH_H3K4ME3	69	0.233527	0.811802	0.694501	0.934405	1	3703	tags=46%, list=34%, signal=70%
SENGUPTA_NASOPHARYNGEAL_CARCINOMA_DN	186	0.22161	0.825053	0.695481	0.928125	1	2727	tags=31%, list=25%, signal=41%
BURTON_ADIPOGENESIS_7	28	0.248676	0.787327	0.695565	0.9384	1	3076	tags=36%, list=28%, signal=50%
KEGG_FRUCTOSE_AND_MANNOSE_METABOLISM	22	0.27761	0.781422	0.695565	0.941842	1	3777	tags=55%, list=35%, signal=84%
MATTIOLI_MGUS_VS_PCL	57	0.227972	0.808496	0.695652	0.934878	1	3296	tags=37%, list=30%, signal=53%
PUJANA_BREAST_CANCER_LIT_INT_NETWORK	64	0.22083	0.801652	0.697341	0.935319	1	3655	tags=39%, list=34%, signal=59%
REACTOME_INWARDLY_RECTIFYING_K_CHANNELS	19	0.271231	0.807626	0.698152	0.935367	1	2605	tags=47%, list=24%, signal=62%
RODRIGUES_THYROID_CARCINOMA_POORLY_DIFFERENTIATED_UP	357	0.21771	0.735869	0.698225	0.954821	1	3432	tags=35%, list=32%, signal=50%
BIOCARTA_CREB_PATHWAY	15	0.276457	0.829432	0.699203	0.929742	1	11	tags=7%, list=0%, signal=7%
SWEET_KRAS_ONCOGENIC_SIGNATURE	43	0.232906	0.811928	0.699411	0.934729	1	2538	tags=28%, list=23%, signal=36%
REACTOME_TELOMERE_MAINTENANCE	44	0.243522	0.733868	0.699597	0.954081	1	2753	tags=32%, list=25%, signal=42%
BROWNE_HCMV_INFECTION_18HR_DN	104	0.211724	0.832468	0.70101	0.929564	1	2657	tags=27%, list=25%, signal=35%
WEIGEL_OXIDATIVE_STRESS_BY_HNE_AND_TBH	34	0.233396	0.84772	0.701172	0.920408	1	2876	tags=26%, list=27%, signal=36%
REACTOME_GLYCOLYSIS	16	0.299954	0.787331	0.701299	0.938964	1	3574	tags=56%, list=33%, signal=84%
MANALO_HYPOXIA_DN	158	0.229697	0.759464	0.701789	0.947375	1	3502	tags=35%, list=32%, signal=52%
KIM_TIAL1_TARGETS	17	0.281791	0.795322	0.701903	0.938098	1	1932	tags=24%, list=18%, signal=29%
NGUYEN_NOTCH1_TARGETS_UP	17	0.263471	0.835364	0.702128	0.92851	1	2365	tags=29%, list=22%, signal=38%
MONNIER_POSTRADIATION_TUMOR_ESCAPE_UP	242	0.184842	0.848258	0.702429	0.92239	1	3152	tags=31%, list=29%, signal=42%
MITSIADES_RESPONSE_TO_APLIDIN_UP	250	0.179543	0.862935	0.702869	0.913823	1	2716	tags=27%, list=25%, signal=35%
KEGG_OOCYTE_MEIOSIS	66	0.214169	0.825177	0.705882	0.928476	1	2956	tags=29%, list=27%, signal=39%
KOKKINAKIS_METHIONINE_DEPRIVATION_48HR_DN	47	0.208197	0.842945	0.707911	0.92561	1	1095	tags=15%, list=10%, signal=16%
SHEPARD_CRUSH_AND_BURN_MUTANT_UP	113	0.205926	0.834182	0.708155	0.929041	1	2349	tags=22%, list=22%, signal=28%
PID_CERAMIDE_PATHWAY	27	0.233108	0.830606	0.708249	0.930376	1	2765	tags=33%, list=26%, signal=45%
REACTOME_ACTIVATED_TLR4_SIGNALLING	55	0.215455	0.827222	0.708861	0.928076	1	2366	tags=27%, list=22%, signal=35%
LIN_NPAS4_TARGETS_DN	36	0.231897	0.834825	0.709369	0.928975	1	2018	tags=22%, list=19%, signal=27%
SEIDEN_ONCOGENESIS_BY_MET	54	0.254224	0.717059	0.710173	0.960266	1	2468	tags=33%, list=23%, signal=43%
OSMAN_BLADDER_CANCER_DN	213	0.185334	0.804744	0.710526	0.937555	1	2148	tags=22%, list=20%, signal=26%
LABBE_TGFB1_TARGETS_DN	56	0.217926	0.848581	0.710891	0.922325	1	2404	tags=25%, list=22%, signal=32%
KANG_GIST_WITH_PDGFRA_UP	29	0.253191	0.81316	0.712245	0.934107	1	1578	tags=24%, list=15%, signal=28%
KEGG_RNA_DEGRADATION	31	0.249972	0.80579	0.715164	0.937275	1	3475	tags=39%, list=32%, signal=57%
HOFFMANN_SMALL_PRE_BII_TO_IMMATURE_B_LYMPHOCYTE_DN	32	0.2358	0.838291	0.715706	0.926703	1	2397	tags=25%, list=22%, signal=32%
NAKAYAMA_FGF2_TARGETS	16	0.281415	0.792416	0.716535	0.937654	1	2134	tags=31%, list=20%, signal=39%
REACTOME_SIGNALING_BY_FGFR1_MUTANTS	16	0.286766	0.816751	0.716832	0.932463	1	3077	tags=50%, list=28%, signal=70%
KEGG_TRYPTOPHAN_METABOLISM	25	0.255526	0.831758	0.717391	0.929798	1	2431	tags=32%, list=22%, signal=41%
HUTTMANN_B_CLL_POOR_SURVIVAL_DN	33	0.262966	0.802808	0.717391	0.936017	1	1726	tags=21%, list=16%, signal=25%
TIEN_INTESTINE_PROBIOTICS_2HR_UP	21	0.257487	0.783855	0.71748	0.940224	1	4317	tags=62%, list=40%, signal=103%
ROESSLER_LIVER_CANCER_METASTASIS_DN	31	0.222974	0.83928	0.717694	0.928413	1	2578	tags=32%, list=24%, signal=42%
REACTOME_AUTODEGRADATION_OF_THE_E3_UBIQUITIN_LIGASE_COP1	28	0.268417	0.735356	0.719078	0.954512	1	4537	tags=61%, list=42%, signal=104%
SHETH_LIVER_CANCER_VS_TXNIP_LOSS_PAM2	93	0.194162	0.864985	0.720497	0.912528	1	3451	tags=39%, list=32%, signal=56%
REACTOME_TRANSPORT_OF_GLUCOSE_AND_OTHER_SUGARS_BILE_SALTS_AND_ORGANIC_ACIDS_METAL_IONS_AND_AMINE_COMPOUNDS	50	0.228975	0.854162	0.720588	0.921279	1	1138	tags=16%, list=11%, signal=18%
BAE_BRCA1_TARGETS_DN	18	0.278868	0.804657	0.721248	0.93714	1	2918	tags=28%, list=27%, signal=38%
ENK_UV_RESPONSE_KERATINOCYTE_UP	329	0.205731	0.733147	0.721757	0.953033	1	2686	tags=29%, list=25%, signal=37%
PLASARI_TGFB1_SIGNALING_VIA_NFIC_1HR_DN	63	0.22383	0.795294	0.722753	0.937572	1	1645	tags=19%, list=15%, signal=22%
HOFFMANN_LARGE_TO_SMALL_PRE_BII_LYMPHOCYTE_DN	45	0.226331	0.815173	0.722892	0.933794	1	2048	tags=24%, list=19%, signal=30%
REACTOME_GLUTATHIONE_CONJUGATION	17	0.290216	0.797245	0.722892	0.938953	1	2263	tags=29%, list=21%, signal=37%
KYNG_DNA_DAMAGE_BY_4NQO	19	0.261633	0.795693	0.722917	0.938479	1	3400	tags=37%, list=31%, signal=54%
KORKOLA_YOLK_SAC_TUMOR	31	0.253715	0.831676	0.722986	0.929367	1	2145	tags=29%, list=20%, signal=36%
REACTOME_TRANSMISSION_ACROSS_CHEMICAL_SYNAPSES	103	0.199872	0.850762	0.723493	0.923355	1	3116	tags=34%, list=29%, signal=47%
BROWNE_HCMV_INFECTION_2HR_DN	25	0.252858	0.810087	0.724951	0.934764	1	3671	tags=44%, list=34%, signal=66%
YAO_TEMPORAL_RESPONSE_TO_PROGESTERONE_CLUSTER_15	22	0.253389	0.812958	0.725296	0.933882	1	644	tags=14%, list=6%, signal=14%
GARGALOVIC_RESPONSE_TO_OXIDIZED_PHOSPHOLIPIDS_BLUE_DN	30	0.246311	0.791798	0.725777	0.937661	1	1359	tags=17%, list=13%, signal=19%
SUMI_HNF4A_TARGETS	16	0.289511	0.827608	0.725838	0.928529	1	507	tags=13%, list=5%, signal=13%
FOSTER_KDM1A_TARGETS_DN	115	0.196689	0.808752	0.726514	0.935572	1	2596	tags=27%, list=24%, signal=35%
PID_ATR_PATHWAY	28	0.258931	0.745863	0.726721	0.951009	1	3277	tags=32%, list=30%, signal=46%
NEMETH_INFLAMMATORY_RESPONSE_LPS_DN	20	0.258551	0.778779	0.729622	0.941531	1	1316	tags=15%, list=12%, signal=17%
BOYLAN_MULTIPLE_MYELOMA_C_D_UP	85	0.205607	0.828068	0.729941	0.928769	1	1435	tags=18%, list=13%, signal=20%
PID_ILK_PATHWAY	27	0.240295	0.793252	0.730469	0.939015	1	3739	tags=41%, list=35%, signal=62%
MARIADASON_RESPONSE_TO_BUTYRATE_SULINDAC_6	30	0.240732	0.802454	0.730916	0.934958	1	3486	tags=47%, list=32%, signal=69%
REACTOME_CYCLIN_E_ASSOCIATED_EVENTS_DURING_G1_S_TRANSITION_	37	0.246026	0.72148	0.731809	0.957714	1	3865	tags=46%, list=36%, signal=71%
KEGG_PRION_DISEASES	18	0.273486	0.760805	0.732793	0.945632	1	3895	tags=50%, list=36%, signal=78%
HUTTMANN_B_CLL_POOR_SURVIVAL_UP	145	0.196481	0.771113	0.733198	0.944679	1	3479	tags=37%, list=32%, signal=54%
CHEOK_RESPONSE_TO_MERCAPTOPURINE_DN	15	0.264578	0.816941	0.733728	0.932689	1	1499	tags=27%, list=14%, signal=31%
REACTOME_POST_TRANSLATIONAL_PROTEIN_MODIFICATION	104	0.204496	0.806294	0.734653	0.937462	1	3136	tags=31%, list=29%, signal=43%
REACTOME_PREFOLDIN_MEDIATED_TRANSFER_OF_SUBSTRATE_TO_CCT_TRIC	20	0.268825	0.73432	0.735537	0.953934	1	948	tags=20%, list=9%, signal=22%
NAGASHIMA_EGF_SIGNALING_UP	37	0.260593	0.750387	0.736082	0.951955	1	2150	tags=30%, list=20%, signal=37%
TURASHVILI_BREAST_LOBULAR_CARCINOMA_VS_DUCTAL_NORMAL_UP	40	0.247679	0.716137	0.736739	0.961051	1	741	tags=15%, list=7%, signal=16%
HOFFMANN_IMMATURE_TO_MATURE_B_LYMPHOCYTE_DN	27	0.244128	0.807649	0.73706	0.93592	1	1361	tags=19%, list=13%, signal=21%
CHIANG_LIVER_CANCER_SUBCLASS_UNANNOTATED_DN	110	0.204234	0.745008	0.737769	0.951266	1	2354	tags=22%, list=22%, signal=28%
BANDRES_RESPONSE_TO_CARMUSTIN_MGMT_48HR_DN	96	0.214807	0.805894	0.738095	0.937667	1	2611	tags=28%, list=24%, signal=37%
REACTOME_ER_PHAGOSOME_PATHWAY	36	0.250193	0.681546	0.738144	0.971807	1	4721	tags=64%, list=44%, signal=113%
RIZ_ERYTHROID_DIFFERENTIATION_HBZ	26	0.247986	0.787372	0.73823	0.93945	1	58	tags=8%, list=1%, signal=8%
REACTOME_CELL_JUNCTION_ORGANIZATION	40	0.23632	0.796842	0.738703	0.938569	1	1688	tags=20%, list=16%, signal=24%
CHARAFE_BREAST_CANCER_BASAL_VS_MESENCHYMAL_DN	33	0.242691	0.764107	0.739496	0.946669	1	3483	tags=42%, list=32%, signal=62%
DARWICHE_PAPILLOMA_RISK_HIGH_VS_LOW_DN	23	0.248428	0.83365	0.739669	0.928925	1	956	tags=17%, list=9%, signal=19%
REACTOME_P53_DEPENDENT_G1_DNA_DAMAGE_RESPONSE	32	0.247826	0.710677	0.739785	0.962893	1	4537	tags=56%, list=42%, signal=97%
MIYAGAWA_TARGETS_OF_EWSR1_ETS_FUSIONS_DN	121	0.211082	0.782273	0.739837	0.942551	1	3624	tags=37%, list=33%, signal=55%
MORI_MATURE_B_LYMPHOCYTE_DN	51	0.218826	0.781472	0.740234	0.942317	1	2363	tags=27%, list=22%, signal=35%
DAVICIONI_TARGETS_OF_PAX_FOXO1_FUSIONS_UP	139	0.202877	0.804243	0.740964	0.936789	1	1779	tags=20%, list=16%, signal=24%
CUI_GLUCOSE_DEPRIVATION	33	0.237523	0.8036	0.741177	0.936256	1	3240	tags=42%, list=30%, signal=60%
APRELIKOVA_BRCA1_TARGETS	30	0.241994	0.802681	0.741683	0.93569	1	3958	tags=53%, list=37%, signal=84%
LIM_MAMMARY_STEM_CELL_UP	277	0.19583	0.773579	0.742	0.94324	1	2909	tags=29%, list=27%, signal=38%
WAKASUGI_HAVE_ZNF143_BINDING_SITES	34	0.243277	0.750237	0.742633	0.951632	1	3566	tags=35%, list=33%, signal=52%
ZWANG_EGF_PERSISTENTLY_UP	17	0.278559	0.781904	0.743902	0.942082	1	589	tags=12%, list=5%, signal=12%
SAKAI_CHRONIC_HEPATITIS_VS_LIVER_CANCER_DN	23	0.263763	0.811234	0.744086	0.934302	1	3249	tags=43%, list=30%, signal=62%
REACTOME_SIGNALING_BY_ERBB4	46	0.221191	0.825896	0.744511	0.929473	1	2780	tags=30%, list=26%, signal=41%
KARLSSON_TGFB1_TARGETS_UP	74	0.212278	0.746263	0.744813	0.952028	1	2446	tags=26%, list=23%, signal=33%
LEE_NEURAL_CREST_STEM_CELL_UP	83	0.209144	0.804462	0.745098	0.936951	1	3481	tags=36%, list=32%, signal=53%
ZHOU_INFLAMMATORY_RESPONSE_LPS_UP	221	0.18638	0.875758	0.745418	0.907811	1	2368	tags=23%, list=22%, signal=29%
LIU_SOX4_TARGETS_UP	74	0.207054	0.796673	0.745597	0.9383	1	2901	tags=28%, list=27%, signal=38%
REACTOME_CDK_MEDIATED_PHOSPHORYLATION_AND_REMOVAL_OF_CDC6	28	0.272867	0.712139	0.746269	0.961422	1	4537	tags=61%, list=42%, signal=104%
ZHOU_TNF_SIGNALING_4HR	33	0.22845	0.790074	0.746362	0.938014	1	3536	tags=36%, list=33%, signal=54%
PID_FRA_PATHWAY	18	0.266881	0.780645	0.747534	0.94268	1	3437	tags=39%, list=32%, signal=57%
RAGHAVACHARI_PLATELET_SPECIFIC_GENES	41	0.215909	0.796019	0.748414	0.938385	1	357	tags=7%, list=3%, signal=8%
JOHNSTONE_PARVB_TARGETS_3_UP	244	0.193298	0.767792	0.748491	0.947105	1	2637	tags=26%, list=24%, signal=33%
CHOW_RASSF1_TARGETS_UP	19	0.254382	0.762122	0.749035	0.94666	1	2977	tags=42%, list=27%, signal=58%
KIM_GERMINAL_CENTER_T_HELPER_UP	40	0.245969	0.752324	0.75	0.951594	1	3871	tags=45%, list=36%, signal=70%
HELLER_HDAC_TARGETS_SILENCED_BY_METHYLATION_DN	145	0.185957	0.809737	0.750507	0.93486	1	3404	tags=34%, list=31%, signal=50%
CHARAFE_BREAST_CANCER_LUMINAL_VS_MESENCHYMAL_UP	258	0.195498	0.746075	0.750515	0.951225	1	2573	tags=26%, list=24%, signal=34%
REACTOME_RECRUITMENT_OF_MITOTIC_CENTROSOME_PROTEINS_AND_COMPLEXES	37	0.223076	0.755465	0.751456	0.949051	1	1936	tags=19%, list=18%, signal=23%
CERVERA_SDHB_TARGETS_1_UP	68	0.215624	0.803326	0.751528	0.935646	1	2527	tags=28%, list=23%, signal=36%
BIOCARTA_GPCR_PATHWAY	22	0.240252	0.800292	0.752475	0.936106	1	2606	tags=23%, list=24%, signal=30%
SIMBULAN_PARP1_TARGETS_UP	17	0.265701	0.750528	0.752556	0.952273	1	3059	tags=47%, list=28%, signal=65%
BILD_MYC_ONCOGENIC_SIGNATURE	113	0.198766	0.773835	0.752621	0.943368	1	2279	tags=21%, list=21%, signal=27%
TORCHIA_TARGETS_OF_EWSR1_FLI1_FUSION_DN	178	0.179649	0.847959	0.752874	0.920525	1	2541	tags=26%, list=23%, signal=33%
KEGG_PROTEASOME	27	0.265902	0.69183	0.753653	0.968975	1	3865	tags=48%, list=36%, signal=75%
GARGALOVIC_RESPONSE_TO_OXIDIZED_PHOSPHOLIPIDS_TURQUOISE_UP	37	0.234753	0.784492	0.753817	0.940193	1	3759	tags=49%, list=35%, signal=74%
REACTOME_ENDOSOMAL_SORTING_COMPLEX_REQUIRED_FOR_TRANSPORT_ESCRT	15	0.267711	0.778992	0.754274	0.941722	1	1169	tags=13%, list=11%, signal=15%
PLASARI_TGFB1_SIGNALING_VIA_NFIC_10HR_DN	16	0.27708	0.749482	0.755952	0.950073	1	3879	tags=50%, list=36%, signal=78%
IKEDA_MIR30_TARGETS_UP	69	0.224958	0.734616	0.75619	0.954045	1	936	tags=14%, list=9%, signal=16%
BENPORATH_PRC2_TARGETS	346	0.195026	0.850522	0.756487	0.921952	1	2331	tags=24%, list=22%, signal=30%
SCHAEFFER_PROSTATE_DEVELOPMENT_12HR_DN	31	0.234422	0.780298	0.756917	0.941616	1	2827	tags=39%, list=26%, signal=52%
KEGG_GLYCEROPHOSPHOLIPID_METABOLISM	49	0.208482	0.801892	0.756989	0.935452	1	1543	tags=18%, list=14%, signal=21%
BIOCARTA_G2_PATHWAY	16	0.275371	0.739553	0.757576	0.954053	1	4468	tags=50%, list=41%, signal=85%
LEIN_CHOROID_PLEXUS_MARKERS	62	0.216934	0.791288	0.757874	0.938006	1	2254	tags=24%, list=21%, signal=30%
BROWNE_HCMV_INFECTION_10HR_DN	32	0.231503	0.786091	0.758034	0.938389	1	1897	tags=22%, list=18%, signal=26%
MOREAUX_B_LYMPHOCYTE_MATURATION_BY_TACI_DN	40	0.231505	0.738165	0.758065	0.95511	1	948	tags=15%, list=9%, signal=16%
CROONQUIST_NRAS_VS_STROMAL_STIMULATION_UP	18	0.248445	0.75194	0.758823	0.95171	1	3112	tags=33%, list=29%, signal=47%
FONTAINE_PAPILLARY_THYROID_CARCINOMA_DN	44	0.217147	0.802544	0.760331	0.935367	1	2122	tags=32%, list=20%, signal=39%
DACOSTA_UV_RESPONSE_VIA_ERCC3_COMMON_DN	263	0.202983	0.697252	0.760911	0.966703	1	3551	tags=35%, list=33%, signal=51%
GOZGIT_ESR1_TARGETS_DN	422	0.184133	0.839113	0.761341	0.927507	1	2647	tags=27%, list=24%, signal=34%
MCBRYAN_PUBERTAL_BREAST_6_7WK_DN	51	0.221476	0.792974	0.761411	0.938969	1	2016	tags=25%, list=19%, signal=31%
BENPORATH_OCT4_TARGETS	172	0.180209	0.833946	0.761996	0.928906	1	3098	tags=30%, list=29%, signal=41%
KEGG_ERBB_SIGNALING_PATHWAY	51	0.207939	0.818095	0.762183	0.932806	1	3069	tags=29%, list=28%, signal=41%
MCBRYAN_PUBERTAL_BREAST_3_4WK_UP	132	0.204456	0.803585	0.763779	0.935687	1	2143	tags=23%, list=20%, signal=29%
HORIUCHI_WTAP_TARGETS_UP	178	0.188451	0.814034	0.764113	0.934276	1	1920	tags=21%, list=18%, signal=25%
KAUFFMANN_DNA_REPAIR_GENES	127	0.190755	0.733631	0.764356	0.953915	1	3566	tags=34%, list=33%, signal=50%
WATANABE_RECTAL_CANCER_RADIOTHERAPY_RESPONSIVE_DN	49	0.204487	0.800629	0.764948	0.936071	1	1360	tags=16%, list=13%, signal=19%
SU_TESTIS	38	0.230299	0.714649	0.766467	0.960522	1	4017	tags=50%, list=37%, signal=79%
SLEBOS_HEAD_AND_NECK_CANCER_WITH_HPV_UP	50	0.224374	0.710069	0.766798	0.962676	1	2715	tags=28%, list=25%, signal=37%
LIM_MAMMARY_STEM_CELL_DN	253	0.181316	0.769042	0.766932	0.946092	1	2554	tags=23%, list=24%, signal=30%
REACTOME_ASSEMBLY_OF_THE_PRE_REPLICATIVE_COMPLEX	36	0.23175	0.669116	0.766949	0.972952	1	3865	tags=44%, list=36%, signal=69%
KEGG_CHRONIC_MYELOID_LEUKEMIA	41	0.21299	0.792835	0.76699	0.938624	1	2661	tags=29%, list=25%, signal=39%
MITSIADES_RESPONSE_TO_APLIDIN_DN	147	0.201398	0.701179	0.767123	0.964192	1	3657	tags=36%, list=34%, signal=54%
PID_BARD1_PATHWAY	21	0.267739	0.736993	0.767396	0.956373	1	4304	tags=48%, list=40%, signal=79%
PID_EPHB_FWD_PATHWAY	23	0.249658	0.743756	0.769531	0.952162	1	2661	tags=35%, list=25%, signal=46%
DEMAGALHAES_AGING_UP	28	0.244325	0.73349	0.770186	0.953598	1	3369	tags=46%, list=31%, signal=67%
REACTOME_G_BETA_GAMMA_SIGNALLING_THROUGH_PI3KGAMMA	17	0.261615	0.778585	0.770355	0.941302	1	3010	tags=41%, list=28%, signal=57%
PUJANA_CHEK2_PCC_NETWORK	434	0.187288	0.682084	0.770624	0.971687	1	3503	tags=34%, list=32%, signal=49%
ZUCCHI_METASTASIS_UP	24	0.236698	0.780346	0.770661	0.942086	1	1462	tags=17%, list=14%, signal=19%
NEWMAN_ERCC6_TARGETS_DN	23	0.265826	0.77391	0.770791	0.943784	1	899	tags=17%, list=8%, signal=19%
LIAN_NEUTROPHIL_GRANULE_CONSTITUENTS	15	0.297573	0.741255	0.770992	0.953464	1	3187	tags=53%, list=29%, signal=75%
VANOEVELEN_MYOGENESIS_SIN3A_TARGETS	116	0.182124	0.79257	0.771717	0.938501	1	3528	tags=34%, list=33%, signal=49%
OSWALD_HEMATOPOIETIC_STEM_CELL_IN_COLLAGEN_GEL_DN	155	0.183757	0.789093	0.772815	0.938632	1	3097	tags=29%, list=29%, signal=40%
YAO_TEMPORAL_RESPONSE_TO_PROGESTERONE_CLUSTER_5	15	0.286847	0.754282	0.772819	0.949401	1	414	tags=13%, list=4%, signal=14%
BIDUS_METASTASIS_DN	103	0.188332	0.787712	0.772908	0.939973	1	2020	tags=19%, list=19%, signal=24%
VANLOO_SP3_TARGETS_DN	44	0.209591	0.765218	0.775758	0.946444	1	2746	tags=32%, list=25%, signal=42%
PID_AR_PATHWAY	39	0.210827	0.775384	0.778004	0.944066	1	2055	tags=23%, list=19%, signal=28%
TSENG_IRS1_TARGETS_DN	82	0.195694	0.796397	0.778431	0.938237	1	2658	tags=28%, list=25%, signal=37%
FONTAINE_FOLLICULAR_THYROID_ADENOMA_UP	45	0.211253	0.798278	0.779592	0.938184	1	2171	tags=27%, list=20%, signal=33%
BONOME_OVARIAN_CANCER_SURVIVAL_SUBOPTIMAL_DEBULKING	281	0.171189	0.82843	0.779626	0.92995	1	2834	tags=27%, list=26%, signal=35%
MARTINEZ_RESPONSE_TO_TRABECTEDIN	28	0.234893	0.728052	0.780115	0.955329	1	2799	tags=36%, list=26%, signal=48%
WOOD_EBV_EBNA1_TARGETS_UP	71	0.199562	0.791041	0.780347	0.937359	1	2879	tags=30%, list=27%, signal=40%
ZHAN_VARIABLE_EARLY_DIFFERENTIATION_GENES_DN	25	0.231256	0.733255	0.780591	0.95342	1	2034	tags=24%, list=19%, signal=29%
MONNIER_POSTRADIATION_TUMOR_ESCAPE_DN	213	0.173753	0.824773	0.781186	0.928064	1	2266	tags=23%, list=21%, signal=28%
BUYTAERT_PHOTODYNAMIC_THERAPY_STRESS_DN	388	0.166374	0.795434	0.781818	0.938445	1	2575	tags=22%, list=24%, signal=28%
STREICHER_LSM1_TARGETS_UP	24	0.23994	0.76754	0.782101	0.946998	1	1958	tags=21%, list=18%, signal=25%
DACOSTA_UV_RESPONSE_VIA_ERCC3_DN	479	0.188286	0.653503	0.782197	0.975345	1	3502	tags=34%, list=32%, signal=49%
TAKAO_RESPONSE_TO_UVB_RADIATION_DN	54	0.201428	0.799793	0.783058	0.936439	1	1624	tags=17%, list=15%, signal=20%
REACTOME_EXTRACELLULAR_MATRIX_ORGANIZATION	50	0.225496	0.728554	0.783133	0.955643	1	2534	tags=28%, list=23%, signal=36%
LE_EGR2_TARGETS_DN	66	0.207415	0.779598	0.7833	0.941173	1	2654	tags=30%, list=25%, signal=40%
MIYAGAWA_TARGETS_OF_EWSR1_ETS_FUSIONS_UP	167	0.18	0.797782	0.784585	0.938543	1	3209	tags=31%, list=30%, signal=44%
REACTOME_DESTABILIZATION_OF_MRNA_BY_AUF1_HNRNP_D0	29	0.255313	0.686395	0.78481	0.972109	1	3865	tags=45%, list=36%, signal=70%
WANG_METHYLATED_IN_BREAST_CANCER	24	0.248358	0.735123	0.78692	0.954323	1	1218	tags=21%, list=11%, signal=23%
DURAND_STROMA_NS_UP	98	0.188125	0.789583	0.789047	0.938325	1	1805	tags=20%, list=17%, signal=24%
SNIJDERS_AMPLIFIED_IN_HEAD_AND_NECK_TUMORS	27	0.243075	0.718397	0.789047	0.958889	1	1750	tags=26%, list=16%, signal=31%
ZWANG_EGF_PERSISTENTLY_DN	24	0.23464	0.741247	0.789579	0.952935	1	3469	tags=33%, list=32%, signal=49%
ZHANG_RESPONSE_TO_IKK_INHIBITOR_AND_TNF_DN	58	0.215008	0.810683	0.789869	0.934196	1	1958	tags=22%, list=18%, signal=27%
SCHRAETS_MLL_TARGETS_UP	21	0.234807	0.748583	0.790323	0.949897	1	462	tags=10%, list=4%, signal=10%
CAFFAREL_RESPONSE_TO_THC_UP	16	0.256497	0.762855	0.790514	0.947092	1	394	tags=13%, list=4%, signal=13%
KRIGE_RESPONSE_TO_TOSEDOSTAT_6HR_UP	494	0.163477	0.843849	0.790984	0.924936	1	2457	tags=22%, list=23%, signal=27%
KEGG_FOCAL_ADHESION	119	0.193595	0.769775	0.792079	0.945348	1	2834	tags=27%, list=26%, signal=36%
LU_TUMOR_VASCULATURE_UP	17	0.265153	0.71386	0.792079	0.96056	1	1067	tags=18%, list=10%, signal=20%
RODWELL_AGING_KIDNEY_NO_BLOOD_UP	124	0.201013	0.762713	0.792887	0.946773	1	2448	tags=25%, list=23%, signal=32%
DURCHDEWALD_SKIN_CARCINOGENESIS_DN	156	0.190381	0.773961	0.793173	0.944256	1	2468	tags=26%, list=23%, signal=34%
ZHU_CMV_8_HR_UP	26	0.235808	0.693007	0.793456	0.970135	1	2484	tags=23%, list=23%, signal=30%
KONDO_PROSTATE_CANCER_HCP_WITH_H3K27ME3	61	0.197432	0.800762	0.793587	0.936391	1	1627	tags=18%, list=15%, signal=21%
SCHAEFFER_PROSTATE_DEVELOPMENT_48HR_DN	251	0.184817	0.775713	0.793713	0.944091	1	2077	tags=21%, list=19%, signal=26%
SIMBULAN_UV_RESPONSE_NORMAL_DN	24	0.242072	0.746136	0.793878	0.951678	1	3234	tags=42%, list=30%, signal=59%
GAZDA_DIAMOND_BLACKFAN_ANEMIA_PROGENITOR_DN	39	0.224709	0.749674	0.794355	0.95086	1	3457	tags=41%, list=32%, signal=60%
THUM_SYSTOLIC_HEART_FAILURE_DN	117	0.19418	0.758309	0.794971	0.948172	1	3067	tags=32%, list=28%, signal=45%
RODRIGUES_DCC_TARGETS_DN	79	0.195415	0.751141	0.795841	0.951856	1	1847	tags=19%, list=17%, signal=23%
EHLERS_ANEUPLOIDY_UP	17	0.268387	0.686382	0.795841	0.971601	1	3486	tags=47%, list=32%, signal=69%
PETROVA_ENDOTHELIUM_LYMPHATIC_VS_BLOOD_UP	75	0.203642	0.761149	0.796371	0.945601	1	3503	tags=41%, list=32%, signal=61%
MULLIGHAN_NPM1_MUTATED_SIGNATURE_1_UP	155	0.174013	0.792538	0.798077	0.937985	1	2805	tags=26%, list=26%, signal=34%
DAZARD_RESPONSE_TO_UV_SCC_DN	67	0.195527	0.736546	0.798419	0.955421	1	3132	tags=34%, list=29%, signal=48%
BOYLAN_MULTIPLE_MYELOMA_PCA3_DN	40	0.208599	0.784485	0.79925	0.939633	1	2597	tags=28%, list=24%, signal=36%
MOSERLE_IFNA_RESPONSE	17	0.284326	0.586554	0.80038	0.988442	1	2499	tags=24%, list=23%, signal=31%
BREDEMEYER_RAG_SIGNALING_VIA_ATM_NOT_VIA_NFKB_DN	18	0.24169	0.773967	0.801181	0.944811	1	2321	tags=28%, list=21%, signal=35%
KERLEY_RESPONSE_TO_CISPLATIN_UP	26	0.241139	0.738481	0.801269	0.955144	1	1218	tags=19%, list=11%, signal=22%
BONCI_TARGETS_OF_MIR15A_AND_MIR16_1	45	0.21714	0.763384	0.802326	0.94673	1	2442	tags=31%, list=23%, signal=40%
SCHAEFFER_PROSTATE_DEVELOPMENT_AND_CANCER_BOX4_DN	25	0.240749	0.683991	0.802682	0.971404	1	3495	tags=36%, list=32%, signal=53%
DAZARD_UV_RESPONSE_CLUSTER_G6	84	0.206188	0.693089	0.803089	0.971083	1	2049	tags=21%, list=19%, signal=26%
REACTOME_INTEGRATION_OF_ENERGY_METABOLISM	72	0.191433	0.8173	0.803181	0.933203	1	2814	tags=31%, list=26%, signal=41%
SCHLOSSER_MYC_TARGETS_AND_SERUM_RESPONSE_DN	24	0.24737	0.675172	0.803213	0.974822	1	3600	tags=42%, list=33%, signal=62%
GALE_APL_WITH_FLT3_MUTATED_UP	31	0.225502	0.7215	0.805447	0.958215	1	3367	tags=42%, list=31%, signal=61%
PID_ATM_PATHWAY	23	0.237523	0.727239	0.806387	0.954904	1	4304	tags=48%, list=40%, signal=79%
NABA_ECM_GLYCOPROTEINS	112	0.209897	0.713496	0.806584	0.960557	1	2239	tags=25%, list=21%, signal=31%
SAKAI_CHRONIC_HEPATITIS_VS_LIVER_CANCER_UP	51	0.216586	0.692973	0.808853	0.969649	1	2159	tags=25%, list=20%, signal=32%
NAKAMURA_ADIPOGENESIS_EARLY_UP	40	0.21245	0.76475	0.80888	0.946681	1	3193	tags=35%, list=29%, signal=49%
WANG_TARGETS_OF_MLL_CBP_FUSION_DN	28	0.214771	0.719388	0.810101	0.95854	1	2073	tags=21%, list=19%, signal=26%
DEBIASI_APOPTOSIS_BY_REOVIRUS_INFECTION_UP	188	0.190643	0.679243	0.810507	0.972526	1	1628	tags=16%, list=15%, signal=18%
REACTOME_SCF_BETA_TRCP_MEDIATED_DEGRADATION_OF_EMI1	28	0.250937	0.656091	0.810526	0.975207	1	3865	tags=46%, list=36%, signal=72%
REACTOME_METABOLISM_OF_LIPIDS_AND_LIPOPROTEINS	278	0.17738	0.814288	0.810547	0.93434	1	1887	tags=19%, list=17%, signal=22%
EBAUER_TARGETS_OF_PAX3_FOXO1_FUSION_UP	121	0.195165	0.805265	0.810591	0.937706	1	3193	tags=34%, list=29%, signal=48%
FIRESTEIN_PROLIFERATION	102	0.184728	0.819812	0.811839	0.932493	1	2823	tags=28%, list=26%, signal=38%
YANG_BCL3_TARGETS_UP	204	0.173823	0.787136	0.811861	0.938187	1	2881	tags=28%, list=27%, signal=37%
GRAESSMANN_APOPTOSIS_BY_SERUM_DEPRIVATION_UP	318	0.171308	0.836173	0.812261	0.928699	1	2058	tags=19%, list=19%, signal=22%
LEE_LIVER_CANCER_E2F1_UP	41	0.217638	0.761584	0.8125	0.945949	1	2876	tags=37%, list=27%, signal=50%
REACTOME_TOLL_RECEPTOR_CASCADES	67	0.189893	0.736192	0.812757	0.954888	1	3362	tags=37%, list=31%, signal=54%
CHICAS_RB1_TARGETS_CONFLUENT	337	0.172027	0.756846	0.813008	0.948952	1	2704	tags=26%, list=25%, signal=34%
ONDER_CDH1_TARGETS_2_UP	147	0.189382	0.697722	0.813253	0.967147	1	2032	tags=20%, list=19%, signal=25%
ROSS_LEUKEMIA_WITH_MLL_FUSIONS	44	0.203992	0.774297	0.813861	0.945397	1	3291	tags=34%, list=30%, signal=49%
EPPERT_PROGENITOR	73	0.202493	0.671061	0.814313	0.972352	1	1713	tags=19%, list=16%, signal=23%
BOYLAN_MULTIPLE_MYELOMA_C_UP	28	0.224845	0.728252	0.814969	0.955574	1	2601	tags=32%, list=24%, signal=42%
ZHAN_MULTIPLE_MYELOMA_SUBGROUPS	19	0.25466	0.67464	0.815109	0.974382	1	1723	tags=21%, list=16%, signal=25%
BIOCARTA_IGF1MTOR_PATHWAY	15	0.2527	0.723398	0.815299	0.957482	1	1085	tags=13%, list=10%, signal=15%
GRADE_COLON_AND_RECTAL_CANCER_UP	159	0.181257	0.706317	0.816367	0.963666	1	2481	tags=23%, list=23%, signal=30%
LIAO_METASTASIS	308	0.169709	0.767915	0.816456	0.947456	1	3536	tags=36%, list=33%, signal=52%
LEIN_PONS_MARKERS	58	0.204031	0.803792	0.816495	0.936477	1	3157	tags=34%, list=29%, signal=48%
GAZDA_DIAMOND_BLACKFAN_ANEMIA_MYELOID_UP	16	0.246385	0.72429	0.816568	0.956661	1	3317	tags=44%, list=31%, signal=63%
BURTON_ADIPOGENESIS_8	46	0.217994	0.725069	0.817248	0.956017	1	1370	tags=17%, list=13%, signal=20%
DORSAM_HOXA9_TARGETS_DN	17	0.240259	0.727525	0.818	0.955559	1	2150	tags=24%, list=20%, signal=29%
JAATINEN_HEMATOPOIETIC_STEM_CELL_UP	179	0.184976	0.765933	0.81854	0.946335	1	2547	tags=26%, list=24%, signal=34%
TAKEDA_TARGETS_OF_NUP98_HOXA9_FUSION_3D_UP	99	0.190268	0.677841	0.818702	0.973188	1	2834	tags=28%, list=26%, signal=38%
CHOI_ATL_STAGE_PREDICTOR	24	0.217828	0.732621	0.819277	0.953322	1	1271	tags=17%, list=12%, signal=19%
REACTOME_G_PROTEIN_BETA_GAMMA_SIGNALLING	19	0.243636	0.741334	0.819328	0.953885	1	3010	tags=37%, list=28%, signal=51%
MASSARWEH_TAMOXIFEN_RESISTANCE_UP	322	0.175563	0.779667	0.819444	0.941624	1	2965	tags=30%, list=27%, signal=39%
MCGARVEY_SILENCED_BY_METHYLATION_IN_COLON_CANCER	22	0.246595	0.775718	0.819961	0.944649	1	467	tags=14%, list=4%, signal=14%
MCMURRAY_TP53_HRAS_COOPERATION_RESPONSE_DN	42	0.208193	0.765749	0.820158	0.946091	1	2530	tags=26%, list=23%, signal=34%
IKEDA_MIR133_TARGETS_UP	23	0.245871	0.681208	0.820663	0.971695	1	2666	tags=30%, list=25%, signal=40%
KEGG_EPITHELIAL_CELL_SIGNALING_IN_HELICOBACTER_PYLORI_INFECTION	46	0.199933	0.763672	0.821429	0.946821	1	788	tags=13%, list=7%, signal=14%
ROSS_AML_WITH_AML1_ETO_FUSION	45	0.196852	0.756377	0.821429	0.948627	1	2834	tags=29%, list=26%, signal=39%
KEGG_COLORECTAL_CANCER	40	0.207092	0.764649	0.822709	0.946298	1	1462	tags=15%, list=14%, signal=17%
FONTAINE_PAPILLARY_THYROID_CARCINOMA_UP	35	0.21121	0.762573	0.822835	0.946456	1	258	tags=9%, list=2%, signal=9%
ACEVEDO_FGFR1_TARGETS_IN_PROSTATE_CANCER_MODEL_DN	181	0.184029	0.791076	0.824	0.937857	1	2647	tags=28%, list=24%, signal=36%
KEGG_REGULATION_OF_ACTIN_CYTOSKELETON	119	0.182279	0.758785	0.824017	0.947953	1	2870	tags=29%, list=27%, signal=38%
XU_GH1_EXOGENOUS_TARGETS_DN	80	0.199335	0.808854	0.824131	0.935963	1	2549	tags=26%, list=24%, signal=34%
HOSHIDA_LIVER_CANCER_LATE_RECURRENCE_DN	41	0.21857	0.804834	0.824197	0.937948	1	2344	tags=29%, list=22%, signal=37%
WATTEL_AUTONOMOUS_THYROID_ADENOMA_UP	43	0.201689	0.772633	0.82449	0.943209	1	594	tags=9%, list=5%, signal=10%
REACTOME_SIGNALING_BY_ROBO_RECEPTOR	17	0.23965	0.742607	0.824762	0.95347	1	1343	tags=18%, list=12%, signal=20%
VERRECCHIA_RESPONSE_TO_TGFB1_C2	18	0.256451	0.690155	0.825	0.969487	1	1925	tags=28%, list=18%, signal=34%
LEE_CALORIE_RESTRICTION_MUSCLE_UP	20	0.243009	0.710658	0.82618	0.962385	1	2819	tags=35%, list=26%, signal=47%
KANNAN_TP53_TARGETS_UP	35	0.214764	0.685259	0.826263	0.971394	1	3627	tags=49%, list=33%, signal=73%
REACTOME_ACTIVATION_OF_ATR_IN_RESPONSE_TO_REPLICATION_STRESS	23	0.236257	0.597101	0.826511	0.988318	1	3762	tags=35%, list=35%, signal=53%
BHAT_ESR1_TARGETS_NOT_VIA_AKT1_DN	54	0.204288	0.726678	0.828947	0.954675	1	2511	tags=26%, list=23%, signal=34%
RICKMAN_HEAD_AND_NECK_CANCER_D	22	0.311283	0.696986	0.829317	0.96653	1	1269	tags=27%, list=12%, signal=31%
PID_ERBB2_ERBB3_PATHWAY	27	0.218567	0.749048	0.83004	0.949694	1	3011	tags=33%, list=28%, signal=46%
REACTOME_REGULATION_OF_WATER_BALANCE_BY_RENAL_AQUAPORINS	26	0.223652	0.753476	0.830339	0.950234	1	3099	tags=42%, list=29%, signal=59%
BOGNI_TREATMENT_RELATED_MYELOID_LEUKEMIA_DN	16	0.236884	0.720539	0.830709	0.957474	1	2847	tags=25%, list=26%, signal=34%
CROONQUIST_NRAS_VS_STROMAL_STIMULATION_DN	54	0.20206	0.662776	0.830986	0.972768	1	1723	tags=19%, list=16%, signal=22%
BIOCARTA_CTCF_PATHWAY	15	0.258982	0.675729	0.831643	0.974701	1	2607	tags=27%, list=24%, signal=35%
JACKSON_DNMT1_TARGETS_DN	15	0.24948	0.668277	0.832636	0.973336	1	2058	tags=27%, list=19%, signal=33%
SMID_BREAST_CANCER_LUMINAL_A_UP	43	0.225307	0.684379	0.832653	0.971461	1	1465	tags=21%, list=14%, signal=24%
PROVENZANI_METASTASIS_UP	102	0.182326	0.772402	0.832677	0.943007	1	3207	tags=33%, list=30%, signal=47%
NAKAYAMA_SOFT_TISSUE_TUMORS_PCA2_DN	49	0.223382	0.705005	0.832998	0.963838	1	1406	tags=18%, list=13%, signal=21%
PECE_MAMMARY_STEM_CELL_DN	78	0.198374	0.689265	0.833333	0.970067	1	2337	tags=23%, list=22%, signal=29%
NOUZOVA_METHYLATED_IN_APL	38	0.204012	0.76607	0.833992	0.946688	1	263	tags=8%, list=2%, signal=8%
ZHANG_RESPONSE_TO_CANTHARIDIN_DN	45	0.200897	0.628921	0.834016	0.982926	1	1190	tags=16%, list=11%, signal=17%
WANG_PROSTATE_CANCER_ANDROGEN_INDEPENDENT	34	0.208101	0.761645	0.835031	0.946403	1	2065	tags=21%, list=19%, signal=25%
HUANG_GATA2_TARGETS_DN	45	0.200711	0.751375	0.835052	0.952055	1	3777	tags=42%, list=35%, signal=65%
BUYTAERT_PHOTODYNAMIC_THERAPY_STRESS_UP	457	0.170142	0.73971	0.835317	0.954356	1	3012	tags=28%, list=28%, signal=37%
YOKOE_CANCER_TESTIS_ANTIGENS	18	0.236553	0.729654	0.835907	0.95454	1	3084	tags=33%, list=28%, signal=47%
ZHENG_IL22_SIGNALING_DN	22	0.238202	0.730848	0.836224	0.953838	1	2173	tags=27%, list=20%, signal=34%
CHARAFE_BREAST_CANCER_LUMINAL_VS_BASAL_UP	213	0.17642	0.786768	0.837022	0.938298	1	2563	tags=24%, list=24%, signal=31%
KAAB_FAILED_HEART_VENTRICLE_DN	28	0.221841	0.701738	0.837161	0.965538	1	3362	tags=39%, list=31%, signal=57%
MCBRYAN_PUBERTAL_BREAST_3_4WK_DN	20	0.238588	0.747472	0.838384	0.95114	1	1431	tags=20%, list=13%, signal=23%
KAAB_FAILED_HEART_ATRIUM_UP	18	0.251601	0.701733	0.839175	0.965018	1	1077	tags=17%, list=10%, signal=18%
DER_IFN_BETA_RESPONSE_UP	61	0.199896	0.671189	0.839357	0.97272	1	1801	tags=16%, list=17%, signal=20%
ZHAN_MULTIPLE_MYELOMA_LB_DN	20	0.239829	0.627814	0.840954	0.981412	1	1326	tags=20%, list=12%, signal=23%
SPIRA_SMOKERS_LUNG_CANCER_UP	24	0.235572	0.681193	0.84127	0.971197	1	2544	tags=33%, list=23%, signal=43%
NIKOLSKY_BREAST_CANCER_7P22_AMPLICON	23	0.233471	0.569412	0.841564	0.990743	1	4751	tags=65%, list=44%, signal=116%
AMIT_EGF_RESPONSE_60_HELA	23	0.227886	0.668202	0.841683	0.972902	1	1626	tags=17%, list=15%, signal=20%
REACTOME_DNA_REPAIR	62	0.190696	0.671396	0.84252	0.973009	1	3566	tags=37%, list=33%, signal=55%
WAGNER_APO2_SENSITIVITY	16	0.243693	0.68232	0.842536	0.971941	1	2965	tags=38%, list=27%, signal=52%
KEGG_PPAR_SIGNALING_PATHWAY	37	0.212329	0.731482	0.84263	0.95448	1	1072	tags=16%, list=10%, signal=18%
WONG_ENDMETRIUM_CANCER_DN	41	0.223084	0.701282	0.842829	0.965106	1	3700	tags=41%, list=34%, signal=63%
BIOCARTA_PROTEASOME_PATHWAY	17	0.241289	0.612927	0.842857	0.983762	1	4438	tags=59%, list=41%, signal=100%
SPIELMAN_LYMPHOBLAST_EUROPEAN_VS_ASIAN_DN	322	0.170426	0.727187	0.843687	0.954434	1	2716	tags=23%, list=25%, signal=30%
ULE_SPLICING_VIA_NOVA2	26	0.219261	0.706705	0.844055	0.96414	1	923	tags=12%, list=9%, signal=13%
WAKABAYASHI_ADIPOGENESIS_PPARG_RXRA_BOUND_36HR	94	0.176838	0.784789	0.844075	0.940202	1	1521	tags=15%, list=14%, signal=17%
BOYAULT_LIVER_CANCER_SUBCLASS_G3_UP	108	0.19401	0.646277	0.844182	0.977568	1	3081	tags=31%, list=28%, signal=42%
GAUSSMANN_MLL_AF4_FUSION_TARGETS_D_UP	26	0.227078	0.749594	0.845529	0.950431	1	2115	tags=31%, list=20%, signal=38%
DAVICIONI_MOLECULAR_ARMS_VS_ERMS_UP	183	0.173297	0.766529	0.846154	0.947585	1	2687	tags=23%, list=25%, signal=31%
REACTOME_TRANSPORT_OF_INORGANIC_CATIONS_ANIONS_AND_AMINO_ACIDS_OLIGOPEPTIDES	41	0.211002	0.747465	0.846307	0.950604	1	2079	tags=22%, list=19%, signal=27%
REACTOME_CYTOSOLIC_TRNA_AMINOACYLATION	15	0.256039	0.63548	0.846639	0.981108	1	2423	tags=27%, list=22%, signal=34%
LIM_MAMMARY_LUMINAL_MATURE_UP	65	0.196731	0.735095	0.848548	0.953813	1	615	tags=11%, list=6%, signal=11%
BIOCARTA_G1_PATHWAY	15	0.249811	0.715604	0.848948	0.96018	1	2327	tags=27%, list=21%, signal=34%
PID_P38_MKK3_6PATHWAY	19	0.21717	0.715791	0.850202	0.960452	1	1654	tags=21%, list=15%, signal=25%
MISHRA_CARCINOMA_ASSOCIATED_FIBROBLAST_DN	17	0.248966	0.702324	0.850394	0.96532	1	2538	tags=24%, list=23%, signal=31%
SMIRNOV_RESPONSE_TO_IR_2HR_DN	27	0.220162	0.709361	0.851064	0.963119	1	3131	tags=33%, list=29%, signal=47%
BROWNE_HCMV_INFECTION_24HR_DN	80	0.184453	0.736683	0.851429	0.956299	1	2624	tags=28%, list=24%, signal=36%
ALCALAY_AML_BY_NPM1_LOCALIZATION_UP	78	0.182252	0.742266	0.851852	0.953437	1	2149	tags=21%, list=20%, signal=25%
KEGG_GLIOMA	36	0.200112	0.741733	0.85439	0.95378	1	2713	tags=25%, list=25%, signal=33%
KEGG_DNA_REPLICATION	23	0.239239	0.584035	0.854545	0.988518	1	3557	tags=43%, list=33%, signal=65%
RUAN_RESPONSE_TO_TNF_DN	55	0.186326	0.73128	0.854839	0.954266	1	3273	tags=38%, list=30%, signal=54%
JAEGER_METASTASIS_UP	26	0.225112	0.67162	0.855212	0.974283	1	3085	tags=38%, list=28%, signal=54%
PENG_LEUCINE_DEPRIVATION_DN	102	0.194065	0.65679	0.855319	0.975025	1	3541	tags=36%, list=33%, signal=53%
RICKMAN_HEAD_AND_NECK_CANCER_B	23	0.233638	0.705202	0.855372	0.964105	1	3377	tags=48%, list=31%, signal=69%
GU_PDEF_TARGETS_UP	41	0.217875	0.654846	0.855397	0.97552	1	1751	tags=20%, list=16%, signal=23%
KEGG_METABOLISM_OF_XENOBIOTICS_BY_CYTOCHROME_P450	35	0.251977	0.706858	0.855446	0.964457	1	1976	tags=29%, list=18%, signal=35%
REACTOME_DNA_STRAND_ELONGATION	18	0.250282	0.57945	0.856299	0.989445	1	3532	tags=44%, list=33%, signal=66%
LIU_NASOPHARYNGEAL_CARCINOMA	38	0.201846	0.755532	0.856566	0.949491	1	1268	tags=16%, list=12%, signal=18%
REACTOME_RNA_POL_II_PRE_TRANSCRIPTION_EVENTS	21	0.227281	0.671882	0.856566	0.974491	1	640	tags=14%, list=6%, signal=15%
GAUSSMANN_MLL_AF4_FUSION_TARGETS_A_DN	54	0.189905	0.756386	0.856574	0.949154	1	3348	tags=35%, list=31%, signal=51%
GAUSSMANN_MLL_AF4_FUSION_TARGETS_E_UP	55	0.19675	0.719301	0.856589	0.958122	1	3105	tags=36%, list=29%, signal=51%
SMID_BREAST_CANCER_BASAL_DN	381	0.170011	0.798952	0.857143	0.937441	1	1824	tags=18%, list=17%, signal=21%
KEGG_TASTE_TRANSDUCTION	23	0.219536	0.655406	0.8583	0.975417	1	702	tags=13%, list=6%, signal=14%
VALK_AML_CLUSTER_15	18	0.225027	0.685324	0.859073	0.971827	1	1439	tags=22%, list=13%, signal=26%
RIZ_ERYTHROID_DIFFERENTIATION_12HR	27	0.213748	0.71609	0.859406	0.960581	1	2482	tags=26%, list=23%, signal=34%
DAUER_STAT3_TARGETS_UP	30	0.228749	0.661285	0.859471	0.97388	1	3636	tags=43%, list=34%, signal=65%
LUCAS_HNF4A_TARGETS_UP	34	0.200963	0.722614	0.859756	0.957039	1	3465	tags=35%, list=32%, signal=52%
MATZUK_SPERMATID_DIFFERENTIATION	21	0.219838	0.714092	0.860279	0.960761	1	3376	tags=43%, list=31%, signal=62%
WEI_MYCN_TARGETS_WITH_E_BOX	449	0.165656	0.678112	0.860279	0.97337	1	3252	tags=30%, list=30%, signal=41%
WEINMANN_ADAPTATION_TO_HYPOXIA_DN	22	0.227671	0.669888	0.860887	0.973135	1	1412	tags=18%, list=13%, signal=21%
CAIRO_HEPATOBLASTOMA_DN	153	0.189748	0.776043	0.860996	0.944627	1	2168	tags=20%, list=20%, signal=24%
GROSS_ELK3_TARGETS_DN	15	0.233984	0.687274	0.863265	0.97155	1	3931	tags=53%, list=36%, signal=84%
ZHOU_INFLAMMATORY_RESPONSE_LIVE_DN	211	0.164017	0.810709	0.863813	0.934739	1	2622	tags=24%, list=24%, signal=31%
WONG_EMBRYONIC_STEM_CELL_CORE	205	0.170167	0.576747	0.863821	0.989567	1	3483	tags=33%, list=32%, signal=48%
ZHAN_MULTIPLE_MYELOMA_MF_UP	32	0.202984	0.723078	0.864	0.956887	1	1882	tags=19%, list=17%, signal=23%
SENESE_HDAC3_TARGETS_DN	293	0.161752	0.81471	0.864372	0.934085	1	3710	tags=38%, list=34%, signal=57%
BRUINS_UVC_RESPONSE_VIA_TP53_GROUP_D	157	0.175316	0.818213	0.866397	0.933195	1	3238	tags=34%, list=30%, signal=48%
KEGG_SPHINGOLIPID_METABOLISM	19	0.233804	0.659545	0.866953	0.973728	1	3625	tags=53%, list=33%, signal=79%
VALK_AML_CLUSTER_12	16	0.236023	0.720763	0.867188	0.957681	1	2733	tags=25%, list=25%, signal=33%
HAMAI_APOPTOSIS_VIA_TRAIL_UP	316	0.180672	0.573635	0.86811	0.990836	1	3595	tags=34%, list=33%, signal=50%
FISCHER_DIRECT_P53_TARGETS_META_ANALYSIS	167	0.174442	0.749713	0.868201	0.951902	1	2868	tags=28%, list=26%, signal=38%
VECCHI_GASTRIC_CANCER_ADVANCED_VS_EARLY_UP	103	0.186794	0.631089	0.868421	0.982515	1	1666	tags=17%, list=15%, signal=20%
WANG_ESOPHAGUS_CANCER_VS_NORMAL_DN	50	0.186984	0.666204	0.870183	0.973111	1	807	tags=10%, list=7%, signal=11%
LU_AGING_BRAIN_UP	156	0.180352	0.735785	0.870406	0.954416	1	2834	tags=31%, list=26%, signal=42%
BOYAULT_LIVER_CANCER_SUBCLASS_G23_UP	33	0.197438	0.608768	0.871541	0.984425	1	3293	tags=42%, list=30%, signal=61%
CHANDRAN_METASTASIS_DN	191	0.178024	0.777675	0.871636	0.942316	1	1942	tags=20%, list=18%, signal=24%
JOHNSTONE_PARVB_TARGETS_2_DN	194	0.180951	0.627841	0.871744	0.981888	1	3638	tags=36%, list=34%, signal=53%
PENG_GLUCOSE_DEPRIVATION_DN	93	0.172454	0.731208	0.872211	0.953824	1	2615	tags=25%, list=24%, signal=32%
GAUSSMANN_MLL_AF4_FUSION_TARGETS_C_UP	93	0.186409	0.725684	0.873267	0.955595	1	2717	tags=28%, list=25%, signal=37%
REACTOME_HIV_LIFE_CYCLE	51	0.196488	0.668109	0.873469	0.972511	1	640	tags=10%, list=6%, signal=10%
REACTOME_SPHINGOLIPID_METABOLISM	41	0.197342	0.672174	0.873727	0.974658	1	3625	tags=39%, list=33%, signal=58%
WELCSH_BRCA1_TARGETS_DN	82	0.185741	0.560576	0.874739	0.990504	1	3641	tags=37%, list=34%, signal=55%
RASHI_RESPONSE_TO_IONIZING_RADIATION_3	27	0.208944	0.627675	0.875252	0.981036	1	1390	tags=15%, list=13%, signal=17%
PUJANA_BREAST_CANCER_WITH_BRCA1_MUTATED_UP	30	0.208872	0.546697	0.875486	0.991314	1	3404	tags=33%, list=31%, signal=48%
CERVERA_SDHB_TARGETS_1_DN	20	0.227445	0.688758	0.875764	0.970167	1	1164	tags=20%, list=11%, signal=22%
KEGG_GLUTATHIONE_METABOLISM	33	0.21028	0.66982	0.875764	0.9727	1	2263	tags=27%, list=21%, signal=34%
PID_ALK1_PATHWAY	17	0.226202	0.639894	0.876	0.979642	1	4462	tags=53%, list=41%, signal=90%
SENGUPTA_NASOPHARYNGEAL_CARCINOMA_WITH_LMP1_UP	219	0.18004	0.647658	0.876209	0.976685	1	2351	tags=25%, list=22%, signal=31%
BOYAULT_LIVER_CANCER_SUBCLASS_G1_DN	22	0.209249	0.663112	0.877629	0.973425	1	2934	tags=32%, list=27%, signal=44%
KEGG_SNARE_INTERACTIONS_IN_VESICULAR_TRANSPORT	22	0.21415	0.693063	0.877847	0.970593	1	2924	tags=36%, list=27%, signal=50%
SU_LIVER	33	0.230762	0.620356	0.877953	0.981243	1	1482	tags=15%, list=14%, signal=18%
WOO_LIVER_CANCER_RECURRENCE_UP	72	0.184588	0.708246	0.878601	0.963059	1	3440	tags=33%, list=32%, signal=49%
WEBER_METHYLATED_HCP_IN_FIBROBLAST_DN	22	0.242874	0.690908	0.878723	0.969571	1	2096	tags=32%, list=19%, signal=39%
REACTOME_LATE_PHASE_OF_HIV_LIFE_CYCLE	44	0.191989	0.637033	0.88024	0.980206	1	3271	tags=32%, list=30%, signal=45%
MA_PITUITARY_FETAL_VS_ADULT_UP	17	0.236058	0.692168	0.880907	0.969097	1	2862	tags=41%, list=26%, signal=56%
PROVENZANI_METASTASIS_DN	77	0.190529	0.708523	0.881874	0.963745	1	2725	tags=27%, list=25%, signal=36%
LEIN_LOCALIZED_TO_PROXIMAL_DENDRITES	23	0.208399	0.683512	0.882591	0.971493	1	1210	tags=13%, list=11%, signal=15%
BLUM_RESPONSE_TO_SALIRASIB_UP	137	0.17135	0.705358	0.8826	0.964431	1	2429	tags=23%, list=22%, signal=29%
FOURNIER_ACINAR_DEVELOPMENT_EARLY_UP	15	0.235528	0.685472	0.882828	0.972154	1	3350	tags=40%, list=31%, signal=58%
REACTOME_TRANSPORT_OF_MATURE_MRNA_DERIVED_FROM_AN_INTRONLESS_TRANSCRIPT	21	0.220399	0.617001	0.883142	0.981981	1	3752	tags=43%, list=35%, signal=65%
DARWICHE_PAPILLOMA_RISK_LOW_DN	79	0.17453	0.781945	0.883197	0.942573	1	3487	tags=33%, list=32%, signal=48%
BROWNE_HCMV_INFECTION_2HR_UP	22	0.225328	0.671495	0.8833	0.973927	1	2577	tags=32%, list=24%, signal=42%
CREIGHTON_ENDOCRINE_THERAPY_RESISTANCE_5	257	0.171302	0.736262	0.883495	0.955302	1	2290	tags=21%, list=21%, signal=26%
LANDIS_ERBB2_BREAST_TUMORS_324_UP	90	0.175825	0.704645	0.883858	0.963815	1	2980	tags=29%, list=28%, signal=40%
COLINA_TARGETS_OF_4EBP1_AND_4EBP2	209	0.165121	0.7704	0.884328	0.945376	1	2687	tags=24%, list=25%, signal=31%
RHODES_UNDIFFERENTIATED_CANCER	44	0.194063	0.54788	0.884381	0.992251	1	1739	tags=18%, list=16%, signal=22%
REACTOME_NFKB_AND_MAP_KINASES_ACTIVATION_MEDIATED_BY_TLR4_SIGNALING_REPERTOIRE	42	0.195496	0.71244	0.885776	0.961542	1	2366	tags=24%, list=22%, signal=30%
HAN_SATB1_TARGETS_UP	234	0.165148	0.789082	0.886179	0.938075	1	3207	tags=30%, list=30%, signal=42%
WAMUNYOKOLI_OVARIAN_CANCER_LMP_UP	154	0.170243	0.640499	0.886316	0.979566	1	2286	tags=21%, list=21%, signal=26%
LEE_LIVER_CANCER_MYC_TGFA_UP	36	0.195904	0.640801	0.887129	0.979787	1	2972	tags=36%, list=27%, signal=50%
TARTE_PLASMA_CELL_VS_B_LYMPHOCYTE_UP	51	0.189181	0.597611	0.887295	0.988947	1	4461	tags=53%, list=41%, signal=90%
PYEON_CANCER_HEAD_AND_NECK_VS_CERVICAL_UP	100	0.179935	0.54755	0.887405	0.991911	1	3133	tags=32%, list=29%, signal=45%
VANTVEER_BREAST_CANCER_POOR_PROGNOSIS	30	0.205164	0.650062	0.88755	0.976773	1	622	tags=10%, list=6%, signal=11%
JIANG_VHL_TARGETS	76	0.180705	0.663479	0.889344	0.973543	1	1734	tags=16%, list=16%, signal=19%
WARTERS_RESPONSE_TO_IR_SKIN	39	0.202041	0.68508	0.88983	0.971105	1	2073	tags=26%, list=19%, signal=32%
GARY_CD5_TARGETS_UP	271	0.159514	0.700383	0.891949	0.964175	1	2921	tags=26%, list=27%, signal=34%
JIANG_TIP30_TARGETS_DN	15	0.23603	0.570494	0.892405	0.991091	1	785	tags=13%, list=7%, signal=14%
WHITFIELD_CELL_CYCLE_S	91	0.180282	0.609215	0.892514	0.984597	1	3383	tags=34%, list=31%, signal=49%
WIERENGA_PML_INTERACTOME	20	0.222299	0.671456	0.894628	0.973448	1	3645	tags=50%, list=34%, signal=75%
LIN_MELANOMA_COPY_NUMBER_DN	20	0.207811	0.62522	0.894845	0.98163	1	382	tags=10%, list=4%, signal=10%
REACTOME_BIOLOGICAL_OXIDATIONS	76	0.218149	0.703358	0.894942	0.964518	1	2302	tags=26%, list=21%, signal=33%
FLECHNER_BIOPSY_KIDNEY_TRANSPLANT_OK_VS_DONOR_UP	319	0.16483	0.697413	0.895551	0.967	1	2245	tags=21%, list=21%, signal=26%
WANG_LMO4_TARGETS_UP	207	0.159901	0.743965	0.896947	0.952368	1	2994	tags=27%, list=28%, signal=36%
PID_REG_GR_PATHWAY	42	0.210389	0.723233	0.897059	0.957191	1	1638	tags=17%, list=15%, signal=20%
ACOSTA_PROLIFERATION_INDEPENDENT_MYC_TARGETS_UP	49	0.177862	0.657916	0.897541	0.974875	1	2884	tags=29%, list=27%, signal=39%
KEGG_TGF_BETA_SIGNALING_PATHWAY	47	0.189731	0.641891	0.897683	0.979281	1	1958	tags=21%, list=18%, signal=26%
ONDER_CDH1_TARGETS_1_UP	77	0.173085	0.692798	0.898406	0.968807	1	2136	tags=22%, list=20%, signal=27%
YAO_TEMPORAL_RESPONSE_TO_PROGESTERONE_CLUSTER_14	85	0.175548	0.584731	0.898551	0.988588	1	2803	tags=27%, list=26%, signal=36%
DACOSTA_UV_RESPONSE_VIA_ERCC3_TTD_DN	45	0.194017	0.621526	0.899431	0.981263	1	620	tags=11%, list=6%, signal=12%
CHIARADONNA_NEOPLASTIC_TRANSFORMATION_CDC25_DN	87	0.178719	0.644967	0.90101	0.978335	1	3161	tags=29%, list=29%, signal=40%
ABRAMSON_INTERACT_WITH_AIRE	21	0.219368	0.607074	0.901961	0.985166	1	3150	tags=29%, list=29%, signal=40%
SESTO_RESPONSE_TO_UV_C5	29	0.204282	0.592105	0.902153	0.987308	1	3149	tags=31%, list=29%, signal=44%
KEGG_ENDOCYTOSIS	98	0.169104	0.736671	0.902439	0.955774	1	2606	tags=21%, list=24%, signal=28%
MIKKELSEN_NPC_HCP_WITH_H3K4ME3_AND_H3K27ME3	112	0.174063	0.739865	0.905039	0.954666	1	2541	tags=22%, list=23%, signal=29%
TSENG_IRS1_TARGETS_UP	59	0.18199	0.706511	0.905544	0.96391	1	2858	tags=27%, list=26%, signal=37%
DAIRKEE_CANCER_PRONE_RESPONSE_BPA_E2	71	0.177406	0.692885	0.906188	0.969224	1	3716	tags=39%, list=34%, signal=60%
PARENT_MTOR_SIGNALING_UP	317	0.160184	0.745759	0.907787	0.950649	1	2589	tags=24%, list=24%, signal=31%
GRADE_COLON_VS_RECTAL_CANCER_DN	26	0.192939	0.660272	0.907869	0.973452	1	2832	tags=35%, list=26%, signal=47%
SCHLOSSER_MYC_TARGETS_AND_SERUM_RESPONSE_UP	28	0.204361	0.592629	0.908907	0.987936	1	1568	tags=18%, list=14%, signal=21%
REACTOME_MEMBRANE_TRAFFICKING	67	0.177484	0.674662	0.909474	0.974871	1	2416	tags=21%, list=22%, signal=27%
WANG_ADIPOGENIC_GENES_REPRESSED_BY_SIRT1	17	0.232478	0.631155	0.91	0.982955	1	2419	tags=29%, list=22%, signal=38%
SHEPARD_BMYB_MORPHOLINO_UP	130	0.166463	0.767178	0.910204	0.947055	1	2172	tags=19%, list=20%, signal=24%
BHAT_ESR1_TARGETS_VIA_AKT1_UP	170	0.174037	0.65435	0.91023	0.975503	1	2654	tags=24%, list=25%, signal=31%
LIN_APC_TARGETS	40	0.187767	0.523814	0.910387	0.990321	1	2293	tags=20%, list=21%, signal=25%
GENTILE_UV_RESPONSE_CLUSTER_D4	31	0.194906	0.628592	0.910646	0.98172	1	4070	tags=48%, list=38%, signal=77%
TIEN_INTESTINE_PROBIOTICS_2HR_DN	61	0.177883	0.642884	0.911153	0.979327	1	3128	tags=31%, list=29%, signal=44%
HARRIS_HYPOXIA	40	0.192138	0.628688	0.911205	0.98262	1	4334	tags=48%, list=40%, signal=79%
WAKABAYASHI_ADIPOGENESIS_PPARG_BOUND_8D	367	0.153757	0.804061	0.912281	0.936556	1	1986	tags=17%, list=18%, signal=20%
RIZ_ERYTHROID_DIFFERENTIATION	40	0.186565	0.62391	0.912424	0.98125	1	4132	tags=50%, list=38%, signal=81%
HECKER_IFNB1_TARGETS	55	0.17094	0.488754	0.912955	0.992829	1	2245	tags=20%, list=21%, signal=25%
WELCSH_BRCA1_TARGETS_UP	112	0.164665	0.704561	0.913131	0.9634	1	2340	tags=20%, list=22%, signal=25%
MCCLUNG_DELTA_FOSB_TARGETS_2WK	32	0.197622	0.672208	0.913307	0.975125	1	4141	tags=53%, list=38%, signal=86%
LEE_LIVER_CANCER_SURVIVAL_DN	102	0.172795	0.601069	0.913481	0.98748	1	3575	tags=38%, list=33%, signal=57%
REACTOME_NEUROTRANSMITTER_RELEASE_CYCLE	19	0.211404	0.65746	0.914	0.974855	1	2884	tags=37%, list=27%, signal=50%
ALFANO_MYC_TARGETS	141	0.157919	0.700562	0.914583	0.964475	1	3404	tags=31%, list=31%, signal=45%
CASORELLI_ACUTE_PROMYELOCYTIC_LEUKEMIA_DN	388	0.150114	0.653477	0.914761	0.974869	1	3503	tags=31%, list=32%, signal=44%
LEE_METASTASIS_AND_ALTERNATIVE_SPLICING_DN	24	0.200742	0.665915	0.915354	0.972895	1	2083	tags=21%, list=19%, signal=26%
DE_YY1_TARGETS_DN	57	0.182937	0.587083	0.917836	0.988571	1	3621	tags=42%, list=33%, signal=63%
MARCINIAK_ER_STRESS_RESPONSE_VIA_CHOP	17	0.217661	0.664616	0.919321	0.973793	1	1658	tags=18%, list=15%, signal=21%
HENDRICKS_SMARCA4_TARGETS_UP	36	0.186646	0.615291	0.919355	0.98238	1	1940	tags=19%, list=18%, signal=24%
RIZKI_TUMOR_INVASIVENESS_3D_UP	102	0.169887	0.780357	0.920168	0.942628	1	3293	tags=33%, list=30%, signal=47%
RATTENBACHER_BOUND_BY_CELF1	221	0.160133	0.786382	0.920223	0.938437	1	2601	tags=24%, list=24%, signal=30%
MARIADASON_REGULATED_BY_HISTONE_ACETYLATION_UP	46	0.178453	0.708423	0.92057	0.963345	1	3322	tags=39%, list=31%, signal=56%
CREIGHTON_ENDOCRINE_THERAPY_RESISTANCE_2	226	0.159526	0.683477	0.920696	0.971017	1	3056	tags=29%, list=28%, signal=40%
NAKAMURA_TUMOR_ZONE_PERIPHERAL_VS_CENTRAL_DN	353	0.157632	0.715488	0.921529	0.959824	1	2554	tags=24%, list=24%, signal=30%
REACTOME_TRANSPORT_OF_MATURE_TRANSCRIPT_TO_CYTOPLASM	32	0.195649	0.585077	0.921875	0.988872	1	3467	tags=34%, list=32%, signal=50%
MARTINEZ_TP53_TARGETS_DN	338	0.168018	0.749473	0.922	0.949538	1	2735	tags=25%, list=25%, signal=33%
BYSTRYKH_HEMATOPOIESIS_STEM_CELL_AND_BRAIN_QTL_CIS	33	0.186407	0.663574	0.922432	0.973931	1	137	tags=6%, list=1%, signal=6%
KEGG_AMINOACYL_TRNA_BIOSYNTHESIS	24	0.202192	0.578444	0.922594	0.989068	1	3765	tags=42%, list=35%, signal=64%
MARTINEZ_RB1_AND_TP53_TARGETS_DN	338	0.170673	0.761218	0.922764	0.946031	1	3086	tags=30%, list=29%, signal=41%
DACOSTA_UV_RESPONSE_VIA_ERCC3_TTD_UP	39	0.183067	0.547015	0.922917	0.991654	1	3404	tags=38%, list=31%, signal=56%
FARMER_BREAST_CANCER_BASAL_VS_LULMINAL	208	0.158154	0.761701	0.923387	0.946848	1	3383	tags=33%, list=31%, signal=47%
MARTORIATI_MDM4_TARGETS_FETAL_LIVER_DN	301	0.16043	0.674033	0.924303	0.97459	1	3522	tags=32%, list=33%, signal=46%
MEISSNER_NPC_HCP_WITH_H3K4ME3_AND_H3K27ME3	75	0.174205	0.6907	0.924752	0.969312	1	2018	tags=19%, list=19%, signal=23%
QUINTENS_EMBRYONIC_BRAIN_RESPONSE_TO_IR	45	0.168762	0.639512	0.925197	0.978989	1	3296	tags=36%, list=30%, signal=51%
CASORELLI_APL_SECONDARY_VS_DE_NOVO_UP	28	0.186541	0.618553	0.925403	0.981224	1	1884	tags=18%, list=17%, signal=22%
ZAMORA_NOS2_TARGETS_DN	57	0.184583	0.628638	0.92623	0.982174	1	4469	tags=54%, list=41%, signal=92%
REACTOME_MRNA_3_END_PROCESSING	20	0.210088	0.569777	0.926641	0.99102	1	3439	tags=35%, list=32%, signal=51%
DARWICHE_SKIN_TUMOR_PROMOTER_DN	93	0.165843	0.754891	0.927165	0.948935	1	2361	tags=22%, list=22%, signal=27%
LAIHO_COLORECTAL_CANCER_SERRATED_UP	72	0.170974	0.629498	0.929719	0.982909	1	2474	tags=22%, list=23%, signal=29%
DAIRKEE_TERT_TARGETS_UP	203	0.154072	0.550439	0.929897	0.992048	1	2402	tags=22%, list=22%, signal=27%
REACTOME_GLUCOSE_TRANSPORT	23	0.204729	0.626866	0.930041	0.980731	1	4118	tags=43%, list=38%, signal=70%
CONCANNON_APOPTOSIS_BY_EPOXOMICIN_DN	101	0.162499	0.6606	0.93014	0.973611	1	2855	tags=26%, list=26%, signal=35%
FLECHNER_PBL_KIDNEY_TRANSPLANT_OK_VS_DONOR_UP	82	0.162727	0.666534	0.93125	0.973254	1	3263	tags=35%, list=30%, signal=50%
REACTOME_TRIF_MEDIATED_TLR3_SIGNALING	41	0.175587	0.643253	0.931624	0.979513	1	2366	tags=24%, list=22%, signal=31%
LIANG_HEMATOPOIESIS_STEM_CELL_NUMBER_SMALL_VS_HUGE_UP	27	0.178333	0.597444	0.932432	0.988573	1	2159	tags=19%, list=20%, signal=23%
PID_P38_ALPHA_BETA_DOWNSTREAM_PATHWAY	29	0.182741	0.666666	0.933045	0.973618	1	2775	tags=24%, list=26%, signal=32%
MARTINEZ_RESPONSE_TO_TRABECTEDIN_DN	163	0.154749	0.573096	0.933202	0.990163	1	2783	tags=25%, list=26%, signal=33%
PELLICCIOTTA_HDAC_IN_ANTIGEN_PRESENTATION_UP	37	0.178325	0.563076	0.933472	0.991652	1	3506	tags=38%, list=32%, signal=56%
REACTOME_SLC_MEDIATED_TRANSMEMBRANE_TRANSPORT	128	0.169509	0.730333	0.934426	0.954042	1	3001	tags=27%, list=28%, signal=36%
HELLER_SILENCED_BY_METHYLATION_DN	65	0.167465	0.653241	0.935039	0.97459	1	2257	tags=18%, list=21%, signal=23%
PID_ERBB1_RECEPTOR_PROXIMAL_PATHWAY	20	0.200231	0.6305	0.935872	0.982517	1	2607	tags=25%, list=24%, signal=33%
BILANGES_SERUM_SENSITIVE_VIA_TSC1	15	0.213565	0.594769	0.936634	0.988005	1	3446	tags=33%, list=32%, signal=49%
PID_P53_REGULATION_PATHWAY	38	0.175654	0.642014	0.937622	0.979669	1	3242	tags=29%, list=30%, signal=41%
JIANG_AGING_CEREBRAL_CORTEX_DN	24	0.182971	0.580604	0.937743	0.989222	1	3272	tags=38%, list=30%, signal=54%
DEBIASI_APOPTOSIS_BY_REOVIRUS_INFECTION_DN	167	0.156899	0.606607	0.937876	0.985027	1	3223	tags=30%, list=30%, signal=42%
FURUKAWA_DUSP6_TARGETS_PCI35_UP	45	0.179092	0.61122	0.937984	0.984553	1	1607	tags=18%, list=15%, signal=21%
SCHLOSSER_SERUM_RESPONSE_DN	381	0.159312	0.627356	0.938697	0.980812	1	2906	tags=27%, list=27%, signal=35%
KEEN_RESPONSE_TO_ROSIGLITAZONE_DN	62	0.174668	0.596845	0.938819	0.988	1	2034	tags=23%, list=19%, signal=28%
REACTOME_SIGNALING_BY_WNT	38	0.168542	0.508048	0.938819	0.991115	1	3865	tags=39%, list=36%, signal=61%
VECCHI_GASTRIC_CANCER_ADVANCED_VS_EARLY_DN	82	0.187336	0.681028	0.939638	0.970883	1	1785	tags=20%, list=16%, signal=23%
[truncated: 113 more rows]

## Sheet: Low expression of STAT1
Table SII. GSEA Kyoto Encyclopedia of Genes and Genomes results. GSEA outcomes of the c5 (c5.all.v6.1.symbols.gmt) reference gene set for the key genes in the Janus kinase-signal transducer and activator of transcription signaling pathway in skin cutaneous melanoma. GSEA, gene set enrichment analysis. GSEA, gene set enrich analysis; KEGG, Kyoto Encyclopedia of Genes and Genomes; ES, enrichment sc…
Name	Size	ES	NES	NOM P-value	FDR q-value	FWER p-value	Rank at max	Leading edge
HEIDENBLAD_AMPLIFIED_IN_PANCREATIC_CANCER	21	-0.690575	-2.04243	<0.001	0.36633	0.257	2494	tags=81%, list=23%, signal=105%
NIKOLSKY_MUTATED_AND_AMPLIFIED_IN_BREAST_CANCER	47	-0.493944	-1.87557	0.00204499	0.918144	0.816	2533	tags=51%, list=23%, signal=66%
PID_WNT_CANONICAL_PATHWAY	15	-0.669888	-1.95558	0.00401606	0.553852	0.541	1265	tags=40%, list=12%, signal=45%
SIG_PIP3_SIGNALING_IN_CARDIAC_MYOCTES	40	-0.461782	-1.69582	0.0100604	1	0.992	2691	tags=43%, list=25%, signal=56%
JOHANSSON_GLIOMAGENESIS_BY_PDGFB_DN	16	-0.582655	-1.72629	0.015748	1	0.985	2651	tags=56%, list=24%, signal=74%
KUUSELO_PANCREATIC_CANCER_19Q13_AMPLIFICATION	15	-0.725819	-1.63892	0.0283401	1	0.999	2081	tags=80%, list=19%, signal=99%
BOYLAN_MULTIPLE_MYELOMA_D_UP	53	-0.370836	-1.52249	0.0290456	1	1	1269	tags=25%, list=12%, signal=28%
RICKMAN_TUMOR_DIFFERENTIATED_WELL_VS_POORLY_UP	142	-0.445521	-1.65727	0.0300429	1	0.998	1779	tags=35%, list=16%, signal=42%
PID_FGF_PATHWAY	26	-0.444762	-1.50693	0.0308642	1	1	1743	tags=38%, list=16%, signal=46%
BIOCARTA_AGR_PATHWAY	19	-0.485753	-1.53336	0.0323232	1	1	2547	tags=42%, list=24%, signal=55%
MILI_PSEUDOPODIA	28	-0.489445	-1.57533	0.0326087	1	1	788	tags=21%, list=7%, signal=23%
FAELT_B_CLL_WITH_VH3_21_DN	24	-0.452238	-1.52204	0.036961	1	1	2733	tags=46%, list=25%, signal=61%
REACTOME_NOTCH1_INTRACELLULAR_DOMAIN_REGULATES_TRANSCRIPTION	24	-0.485885	-1.57332	0.039916	1	1	3456	tags=63%, list=32%, signal=92%
RICKMAN_METASTASIS_UP	175	-0.376133	-1.51582	0.0411255	1	1	2410	tags=37%, list=22%, signal=46%
LANDIS_ERBB2_BREAST_PRENEOPLASTIC_DN	36	-0.468159	-1.60617	0.0439122	1	1	2563	tags=53%, list=24%, signal=69%
REACTOME_SIGNALING_BY_NOTCH1	40	-0.408986	-1.54469	0.0448065	1	1	3467	tags=52%, list=32%, signal=77%
CHENG_RESPONSE_TO_NICKEL_ACETATE	23	-0.436509	-1.49244	0.0470348	1	1	2858	tags=52%, list=26%, signal=71%
ONKEN_UVEAL_MELANOMA_DN	321	-0.34455	-1.49994	0.0535332	1	1	2586	tags=36%, list=24%, signal=46%
MOLENAAR_TARGETS_OF_CCND1_AND_CDK4_UP	37	-0.45202	-1.54599	0.0550847	1	1	2539	tags=43%, list=23%, signal=56%
REACTOME_SIGNALING_BY_INSULIN_RECEPTOR	62	-0.339891	-1.39441	0.0564202	1	1	2990	tags=39%, list=28%, signal=53%
GAZDA_DIAMOND_BLACKFAN_ANEMIA_MYELOID_DN	22	-0.487381	-1.53743	0.0598802	1	1	3573	tags=64%, list=33%, signal=95%
LEE_AGING_MUSCLE_UP	24	-0.463751	-1.48228	0.061144	1	1	1297	tags=29%, list=12%, signal=33%
CHANDRAN_METASTASIS_TOP50_DN	29	-0.408669	-1.4403	0.0661323	1	1	2661	tags=52%, list=25%, signal=68%
FIGUEROA_AML_METHYLATION_CLUSTER_2_UP	28	-0.441063	-1.45434	0.0665281	1	1	1814	tags=39%, list=17%, signal=47%
BOYAULT_LIVER_CANCER_SUBCLASS_G123_DN	27	-0.456362	-1.48353	0.0666667	1	1	3234	tags=52%, list=30%, signal=74%
LINDVALL_IMMORTALIZED_BY_TERT_UP	50	-0.389363	-1.43656	0.08	1	1	910	tags=24%, list=8%, signal=26%
VANDESLUIS_NORMAL_EMBRYOS_DN	15	-0.513092	-1.41504	0.0808679	1	1	3387	tags=80%, list=31%, signal=116%
KEGG_BUTANOATE_METABOLISM	21	-0.483949	-1.42144	0.0821643	1	1	2545	tags=57%, list=24%, signal=75%
RODWELL_AGING_KIDNEY_NO_BLOOD_DN	86	-0.349997	-1.37268	0.0829787	1	1	3416	tags=49%, list=32%, signal=71%
RODWELL_AGING_KIDNEY_DN	79	-0.336741	-1.36301	0.0836735	1	1	3416	tags=52%, list=32%, signal=75%
VERHAAK_GLIOBLASTOMA_CLASSICAL	91	-0.377077	-1.40039	0.0932203	1	1	2335	tags=40%, list=22%, signal=50%
CHANG_CORE_SERUM_RESPONSE_DN	104	-0.319088	-1.35117	0.0967078	1	1	2354	tags=36%, list=22%, signal=45%
REACTOME_RESPIRATORY_ELECTRON_TRANSPORT_ATP_SYNTHESIS_BY_CHEMIOSMOTIC_COUPLING_AND_HEAT_PRODUCTION_BY_UNCOUPLING_PROTEINS_	56	-0.591441	-1.52915	0.100952	1	1	3443	tags=73%, list=32%, signal=107%
REACTOME_RESPIRATORY_ELECTRON_TRANSPORT	46	-0.608521	-1.52768	0.104046	1	1	2897	tags=67%, list=27%, signal=92%
YAO_TEMPORAL_RESPONSE_TO_PROGESTERONE_CLUSTER_12	48	-0.394999	-1.38203	0.108	1	1	2675	tags=46%, list=25%, signal=61%
GUENTHER_GROWTH_SPHERICAL_VS_ADHERENT_UP	15	-0.50603	-1.37071	0.108511	1	1	1541	tags=33%, list=14%, signal=39%
SIG_INSULIN_RECEPTOR_PATHWAY_IN_CARDIAC_MYOCYTES	30	-0.392333	-1.3451	0.109731	1	1	2691	tags=30%, list=25%, signal=40%
KEGG_FATTY_ACID_METABOLISM	22	-0.493681	-1.42871	0.110236	1	1	2207	tags=50%, list=20%, signal=63%
ODONNELL_METASTASIS_UP	44	-0.369158	-1.34544	0.112527	1	1	1453	tags=27%, list=13%, signal=31%
KEGG_HUNTINGTONS_DISEASE	92	-0.41655	-1.45191	0.113725	1	1	2897	tags=50%, list=27%, signal=68%
KEGG_OXIDATIVE_PHOSPHORYLATION	76	-0.529015	-1.50347	0.11501	1	1	3443	tags=68%, list=32%, signal=100%
REACTOME_GENERIC_TRANSCRIPTION_PATHWAY	211	-0.420306	-1.52574	0.115152	1	1	1466	tags=28%, list=14%, signal=32%
WAKABAYASHI_ADIPOGENESIS_PPARG_BOUND_36HR	18	-0.428486	-1.35615	0.115308	1	1	1797	tags=33%, list=17%, signal=40%
YAMASHITA_LIVER_CANCER_WITH_EPCAM_UP	32	-0.520053	-1.51057	0.11583	1	1	2982	tags=59%, list=28%, signal=82%
REACTOME_TCA_CYCLE_AND_RESPIRATORY_ELECTRON_TRANSPORT	76	-0.529873	-1.49968	0.116505	1	1	3443	tags=68%, list=32%, signal=100%
RAMPON_ENRICHED_LEARNING_ENVIRONMENT_LATE_UP	15	-0.506905	-1.40464	0.117188	1	1	1930	tags=40%, list=18%, signal=49%
MCCLUNG_CREB1_TARGETS_UP	54	-0.33402	-1.28302	0.118236	1	1	1637	tags=26%, list=15%, signal=30%
BILANGES_SERUM_AND_RAPAMYCIN_SENSITIVE_GENES	43	-0.621055	-1.56133	0.124031	1	1	3439	tags=81%, list=32%, signal=119%
KEGG_BETA_ALANINE_METABOLISM	17	-0.455007	-1.36582	0.125523	1	1	2207	tags=41%, list=20%, signal=52%
GHANDHI_DIRECT_IRRADIATION_DN	20	-0.464361	-1.36324	0.128	1	1	1105	tags=40%, list=10%, signal=44%
CHENG_IMPRINTED_BY_ESTRADIOL	62	-0.307168	-1.25841	0.129817	1	1	1243	tags=21%, list=11%, signal=24%
COLDREN_GEFITINIB_RESISTANCE_UP	42	-0.407258	-1.38644	0.13189	1	1	2151	tags=38%, list=20%, signal=47%
BILANGES_RAPAMYCIN_SENSITIVE_VIA_TSC1_AND_TSC2	44	-0.487587	-1.45362	0.133733	1	1	3034	tags=61%, list=28%, signal=85%
ST_WNT_BETA_CATENIN_PATHWAY	23	-0.422246	-1.30821	0.133758	1	1	2684	tags=35%, list=25%, signal=46%
GINESTIER_BREAST_CANCER_20Q13_AMPLIFICATION_UP	60	-0.347438	-1.3301	0.135484	1	1	3018	tags=47%, list=28%, signal=64%
MILI_PSEUDOPODIA_CHEMOTAXIS_UP	44	-0.381396	-1.34109	0.135699	1	1	792	tags=18%, list=7%, signal=20%
CHNG_MULTIPLE_MYELOMA_HYPERPLOID_UP	33	-0.603688	-1.48603	0.135922	1	1	3414	tags=85%, list=32%, signal=124%
REACTOME_SIGNALING_BY_NOTCH	60	-0.313382	-1.27981	0.135983	1	1	3467	tags=45%, list=32%, signal=66%
GOLDRATH_HOMEOSTATIC_PROLIFERATION	110	-0.315717	-1.3213	0.137255	1	1	3882	tags=53%, list=36%, signal=81%
FIGUEROA_AML_METHYLATION_CLUSTER_7_UP	64	-0.2854	-1.2266	0.137931	1	1	2034	tags=31%, list=19%, signal=38%
NIKOLSKY_BREAST_CANCER_8Q23_Q24_AMPLICON	78	-0.476267	-1.44954	0.140873	1	1	2525	tags=50%, list=23%, signal=65%
BERNARD_PPAPDC1B_TARGETS_UP	18	-0.429434	-1.30981	0.141372	1	1	1139	tags=33%, list=11%, signal=37%
MOOTHA_VOXPHOS	54	-0.579341	-1.48415	0.143969	1	1	3443	tags=69%, list=32%, signal=100%
AGUIRRE_PANCREATIC_CANCER_COPY_NUMBER_UP	158	-0.359788	-1.35075	0.145455	1	1	2877	tags=42%, list=27%, signal=57%
KAYO_AGING_MUSCLE_UP	137	-0.279153	-1.24187	0.145669	1	1	1871	tags=25%, list=17%, signal=30%
CHIANG_LIVER_CANCER_SUBCLASS_INTERFERON_DN	23	-0.384694	-1.28511	0.146138	1	1	2007	tags=35%, list=19%, signal=43%
BILANGES_SERUM_SENSITIVE_GENES	44	-0.330482	-1.28056	0.147917	1	1	1014	tags=18%, list=9%, signal=20%
BILANGES_SERUM_RESPONSE_TRANSLATION	17	-0.593002	-1.46098	0.148	1	1	3714	tags=76%, list=34%, signal=116%
DAZARD_UV_RESPONSE_CLUSTER_G1	43	-0.394437	-1.34444	0.14902	1	1	2257	tags=40%, list=21%, signal=50%
REACTOME_SRP_DEPENDENT_COTRANSLATIONAL_PROTEIN_TARGETING_TO_MEMBRANE	66	-0.55807	-1.4786	0.149901	1	1	3425	tags=77%, list=32%, signal=112%
RODRIGUES_THYROID_CARCINOMA_ANAPLASTIC_DN	310	-0.279771	-1.26964	0.151899	1	1	2845	tags=35%, list=26%, signal=46%
KEGG_PARKINSONS_DISEASE	74	-0.462591	-1.4	0.154739	1	1	2897	tags=58%, list=27%, signal=79%
KIM_BIPOLAR_DISORDER_OLIGODENDROCYTE_DENSITY_CORR_UP	376	-0.318977	-1.32102	0.156	1	1	2950	tags=39%, list=27%, signal=51%
DOANE_BREAST_CANCER_CLASSES_DN	16	-0.414538	-1.28129	0.15812	1	1	3302	tags=56%, list=30%, signal=81%
REACTOME_NUCLEAR_RECEPTOR_TRANSCRIPTION_PATHWAY	30	-0.353578	-1.24184	0.16	1	1	1076	tags=20%, list=10%, signal=22%
JAERVINEN_AMPLIFIED_IN_LARYNGEAL_CANCER	24	-0.393767	-1.28115	0.163636	1	1	1705	tags=33%, list=16%, signal=39%
KEGG_RIBOSOME	55	-0.624794	-1.4676	0.164062	1	1	3425	tags=87%, list=32%, signal=127%
REACTOME_PEPTIDE_CHAIN_ELONGATION	52	-0.632665	-1.4347	0.166016	1	1	3425	tags=90%, list=32%, signal=132%
VALK_AML_WITH_CEBPA	19	-0.415207	-1.27169	0.166667	1	1	1414	tags=37%, list=13%, signal=42%
KORKOLA_CORRELATED_WITH_POU5F1	18	-0.446051	-1.29	0.166976	1	1	1978	tags=39%, list=18%, signal=48%
REACTOME_INFLUENZA_VIRAL_RNA_TRANSCRIPTION_AND_REPLICATION	57	-0.593271	-1.45874	0.167315	1	1	3425	tags=82%, list=32%, signal=120%
CREIGHTON_ENDOCRINE_THERAPY_RESISTANCE_4	178	-0.24363	-1.18302	0.167715	1	1	1596	tags=21%, list=15%, signal=25%
FLECHNER_BIOPSY_KIDNEY_TRANSPLANT_OK_VS_DONOR_DN	15	-0.476195	-1.28565	0.169291	1	1	2511	tags=53%, list=23%, signal=69%
KEGG_WNT_SIGNALING_PATHWAY	88	-0.306615	-1.24712	0.169697	1	1	2793	tags=39%, list=26%, signal=52%
NAKAYAMA_SOFT_TISSUE_TUMORS_PCA1_DN	45	-0.395773	-1.30433	0.171247	1	1	3223	tags=49%, list=30%, signal=69%
MATZUK_SPERMATOCYTE	40	-0.337291	-1.23764	0.173038	1	1	2032	tags=28%, list=19%, signal=34%
WILCOX_RESPONSE_TO_PROGESTERONE_DN	46	-0.362448	-1.26701	0.173737	1	1	1679	tags=30%, list=16%, signal=36%
REACTOME_INFLUENZA_LIFE_CYCLE	75	-0.511021	-1.44473	0.174853	1	1	3425	tags=65%, list=32%, signal=95%
PID_IGF1_PATHWAY	18	-0.420199	-1.27768	0.176715	1	1	224	tags=17%, list=2%, signal=17%
REACTOME_VOLTAGE_GATED_POTASSIUM_CHANNELS	20	-0.426148	-1.27415	0.178715	1	1	2125	tags=35%, list=20%, signal=43%
KORKOLA_SEMINOMA_UP	22	-0.447549	-1.32171	0.180198	1	1	2645	tags=59%, list=24%, signal=78%
REACTOME_PPARA_ACTIVATES_GENE_EXPRESSION	62	-0.300448	-1.21926	0.180293	1	1	1701	tags=24%, list=16%, signal=29%
MIKKELSEN_MCV6_ICP_WITH_H3K4ME3_AND_H3K27ME3	16	-0.449322	-1.2539	0.181467	1	1	1523	tags=38%, list=14%, signal=44%
KEGG_LYSINE_DEGRADATION	25	-0.407335	-1.30783	0.181818	1	1	2207	tags=48%, list=20%, signal=60%
NIELSEN_GIST	53	-0.331539	-1.23749	0.182203	1	1	1879	tags=28%, list=17%, signal=34%
REACTOME_3_UTR_MEDIATED_TRANSLATIONAL_REGULATION	66	-0.577065	-1.43047	0.183594	1	1	3425	tags=82%, list=32%, signal=119%
KEGG_CYSTEINE_AND_METHIONINE_METABOLISM	22	-0.414905	-1.29614	0.183716	1	1	1325	tags=27%, list=12%, signal=31%
AUNG_GASTRIC_CANCER	32	-0.351677	-1.23048	0.184676	1	1	2207	tags=38%, list=20%, signal=47%
REACTOME_POTASSIUM_CHANNELS	55	-0.318601	-1.20404	0.185771	1	1	1674	tags=29%, list=15%, signal=34%
RIZ_ERYTHROID_DIFFERENTIATION_APOBEC2	17	-0.422054	-1.24743	0.190099	1	1	2524	tags=47%, list=23%, signal=61%
HOSHIDA_LIVER_CANCER_SUBCLASS_S2	73	-0.349588	-1.27562	0.191083	1	1	1164	tags=21%, list=11%, signal=23%
REACTOME_TRANSLATION	88	-0.501661	-1.40591	0.191919	1	1	3425	tags=70%, list=32%, signal=102%
ST_G_ALPHA_I_PATHWAY	17	-0.388284	-1.23309	0.192	1	1	2194	tags=35%, list=20%, signal=44%
PID_WNT_NONCANONICAL_PATHWAY	16	-0.398358	-1.23162	0.192547	1	1	2335	tags=38%, list=22%, signal=48%
HEDENFALK_BREAST_CANCER_HEREDITARY_VS_SPORADIC	27	-0.374133	-1.25906	0.193294	1	1	1216	tags=22%, list=11%, signal=25%
KRASNOSELSKAYA_ILF3_TARGETS_DN	27	-0.383815	-1.25076	0.193974	1	1	1974	tags=33%, list=18%, signal=41%
REACTOME_AMINO_ACID_TRANSPORT_ACROSS_THE_PLASMA_MEMBRANE	16	-0.443736	-1.23734	0.197065	1	1	1197	tags=31%, list=11%, signal=35%
REACTOME_INSULIN_RECEPTOR_SIGNALLING_CASCADE	49	-0.315103	-1.1996	0.198397	1	1	2990	tags=37%, list=28%, signal=51%
KEGG_ALZHEIMERS_DISEASE	102	-0.356217	-1.27468	0.201161	1	1	3443	tags=55%, list=32%, signal=80%
MOOTHA_GLYCOGEN_METABOLISM	15	-0.409209	-1.23646	0.203426	1	1	680	tags=20%, list=6%, signal=21%
HOELZEL_NF1_TARGETS_DN	53	-0.323093	-1.20161	0.203666	1	1	1340	tags=26%, list=12%, signal=30%
BURTON_ADIPOGENESIS_PEAK_AT_0HR	39	-0.378524	-1.22452	0.204082	1	1	1936	tags=33%, list=18%, signal=40%
LEIN_MEDULLA_MARKERS	47	-0.304174	-1.17535	0.205426	1	1	2943	tags=43%, list=27%, signal=58%
BILANGES_RAPAMYCIN_SENSITIVE_GENES	23	-0.372476	-1.2227	0.207469	1	1	2519	tags=43%, list=23%, signal=57%
MIDORIKAWA_AMPLIFIED_IN_LIVER_CANCER	30	-0.371017	-1.26205	0.207767	1	1	2495	tags=37%, list=23%, signal=48%
NIKOLSKY_BREAST_CANCER_8P12_P11_AMPLICON	34	-0.442731	-1.29422	0.207921	1	1	2637	tags=47%, list=24%, signal=62%
DAVICIONI_MOLECULAR_ARMS_VS_ERMS_DN	105	-0.319851	-1.21961	0.21	1	1	3251	tags=46%, list=30%, signal=65%
REACTOME_MITOCHONDRIAL_PROTEIN_IMPORT	36	-0.489793	-1.32715	0.210216	1	1	3806	tags=58%, list=35%, signal=90%
REACTOME_NONSENSE_MEDIATED_DECAY_ENHANCED_BY_THE_EXON_JUNCTION_COMPLEX	67	-0.518479	-1.37719	0.21063	1	1	3425	tags=76%, list=32%, signal=111%
DOANE_BREAST_CANCER_CLASSES_UP	47	-0.347116	-1.21447	0.212121	1	1	2461	tags=43%, list=23%, signal=55%
LIN_MELANOMA_COPY_NUMBER_UP	36	-0.408139	-1.28069	0.212181	1	1	2290	tags=44%, list=21%, signal=56%
PACHER_TARGETS_OF_IGF1_AND_IGF2_UP	15	-0.417485	-1.21733	0.212302	1	1	1976	tags=40%, list=18%, signal=49%
REACTOME_NETRIN1_SIGNALING	20	-0.399278	-1.21284	0.214286	1	1	966	tags=30%, list=9%, signal=33%
MIKKELSEN_ES_HCP_WITH_H3_UNMETHYLATED	34	-0.334271	-1.1776	0.215886	1	1	1853	tags=38%, list=17%, signal=46%
MIKKELSEN_IPS_HCP_WITH_H3_UNMETHYLATED	40	-0.341133	-1.19423	0.216162	1	1	1853	tags=43%, list=17%, signal=51%
KEGG_TYPE_II_DIABETES_MELLITUS	24	-0.358899	-1.20493	0.220238	1	1	475	tags=17%, list=4%, signal=17%
KEEN_RESPONSE_TO_ROSIGLITAZONE_UP	21	-0.400614	-1.22277	0.222222	1	1	2119	tags=38%, list=20%, signal=47%
BERENJENO_TRANSFORMED_BY_RHOA_DN	228	-0.267306	-1.18514	0.224449	1	1	3027	tags=38%, list=28%, signal=52%
RICKMAN_TUMOR_DIFFERENTIATED_WELL_VS_MODERATELY_UP	67	-0.299291	-1.18367	0.226782	1	1	1842	tags=33%, list=17%, signal=39%
TURASHVILI_BREAST_DUCTAL_CARCINOMA_VS_DUCTAL_NORMAL_UP	25	-0.439526	-1.26255	0.226981	1	1	2579	tags=44%, list=24%, signal=58%
REACTOME_FORMATION_OF_THE_TERNARY_COMPLEX_AND_SUBSEQUENTLY_THE_43S_COMPLEX	30	-0.568459	-1.36765	0.229412	1	1	3956	tags=83%, list=37%, signal=131%
DOUGLAS_BMI1_TARGETS_UP	323	-0.246555	-1.14499	0.229839	1	1	1989	tags=24%, list=18%, signal=28%
TAKADA_GASTRIC_CANCER_COPY_NUMBER_DN	15	-0.43757	-1.22329	0.233607	1	1	3730	tags=67%, list=34%, signal=102%
BRUINS_UVC_RESPONSE_MIDDLE	54	-0.30412	-1.17147	0.235529	1	1	2975	tags=37%, list=27%, signal=51%
PID_RXR_VDR_PATHWAY	17	-0.390367	-1.18897	0.239521	1	1	1526	tags=24%, list=14%, signal=27%
HUI_MAPK14_TARGETS_UP	15	-0.413737	-1.20226	0.239604	1	1	1284	tags=33%, list=12%, signal=38%
ABE_INNER_EAR	28	-0.40231	-1.21391	0.243852	1	1	2354	tags=43%, list=22%, signal=55%
BREUHAHN_GROWTH_FACTOR_SIGNALING_IN_LIVER_CANCER	15	-0.434226	-1.2187	0.244111	1	1	2793	tags=47%, list=26%, signal=63%
FAELT_B_CLL_WITH_VH_REARRANGEMENTS_UP	27	-0.344167	-1.1732	0.245322	1	1	2092	tags=37%, list=19%, signal=46%
FLOTHO_PEDIATRIC_ALL_THERAPY_RESPONSE_UP	34	-0.386426	-1.22349	0.248047	1	1	2699	tags=59%, list=25%, signal=78%
POMEROY_MEDULLOBLASTOMA_DESMOPLASIC_VS_CLASSIC_DN	37	-0.387655	-1.23479	0.249505	1	1	2454	tags=46%, list=23%, signal=59%
LIU_LIVER_CANCER	16	-0.439965	-1.22389	0.250489	1	1	1474	tags=38%, list=14%, signal=43%
ROME_INSULIN_TARGETS_IN_MUSCLE_UP	246	-0.250437	-1.13439	0.251968	1	1	2098	tags=28%, list=19%, signal=34%
PID_MYC_PATHWAY	17	-0.402185	-1.19056	0.254509	1	1	574	tags=24%, list=5%, signal=25%
KEGG_PROPANOATE_METABOLISM	20	-0.427305	-1.21258	0.257028	1	1	2207	tags=45%, list=20%, signal=56%
HUANG_FOXA2_TARGETS_UP	30	-0.325887	-1.13282	0.259188	1	1	2466	tags=43%, list=23%, signal=56%
ST_GAQ_PATHWAY	18	-0.39874	-1.17811	0.260437	1	1	634	tags=22%, list=6%, signal=24%
CAIRO_HEPATOBLASTOMA_UP	112	-0.302823	-1.17888	0.261603	1	1	1371	tags=21%, list=13%, signal=23%
REACTOME_PHOSPHOLIPASE_C_MEDIATED_CASCADE	26	-0.333879	-1.14974	0.262042	1	1	1743	tags=27%, list=16%, signal=32%
LIANG_HEMATOPOIESIS_STEM_CELL_NUMBER_SMALL_VS_HUGE_DN	18	-0.367221	-1.14926	0.262846	1	1	207	tags=17%, list=2%, signal=17%
APPIERTO_RESPONSE_TO_FENRETINIDE_UP	24	-0.376334	-1.16641	0.263473	1	1	2099	tags=33%, list=19%, signal=41%
MIKKELSEN_NPC_ICP_WITH_H3K4ME3	233	-0.227338	-1.09439	0.264642	1	1	1754	tags=23%, list=16%, signal=27%
GOTZMANN_EPITHELIAL_TO_MESENCHYMAL_TRANSITION_DN	127	-0.250365	-1.10736	0.26499	1	1	2743	tags=35%, list=25%, signal=47%
FERREIRA_EWINGS_SARCOMA_UNSTABLE_VS_STABLE_DN	54	-0.318997	-1.14334	0.26572	1	1	2712	tags=37%, list=25%, signal=49%
RUIZ_TNC_TARGETS_UP	88	-0.296665	-1.15463	0.266112	1	1	2596	tags=39%, list=24%, signal=50%
BOYLAN_MULTIPLE_MYELOMA_D_CLUSTER_UP	16	-0.37549	-1.13554	0.266272	1	1	2540	tags=44%, list=23%, signal=57%
WARTERS_IR_RESPONSE_5GY	21	-0.384523	-1.156	0.267578	1	1	2478	tags=43%, list=23%, signal=55%
SANSOM_WNT_PATHWAY_REQUIRE_MYC	38	-0.316236	-1.13389	0.268908	1	1	2830	tags=39%, list=26%, signal=53%
BREDEMEYER_RAG_SIGNALING_VIA_ATM_NOT_VIA_NFKB_UP	26	-0.325922	-1.1323	0.269076	1	1	1786	tags=31%, list=16%, signal=37%
LUI_THYROID_CANCER_CLUSTER_3	22	-0.47292	-1.24085	0.272366	1	1	3416	tags=64%, list=32%, signal=93%
MCCLUNG_COCAINE_REWARD_5D	44	-0.294069	-1.12803	0.274704	1	1	2151	tags=36%, list=20%, signal=45%
TANG_SENESCENCE_TP53_TARGETS_UP	17	-0.378405	-1.15057	0.277359	1	1	2706	tags=47%, list=25%, signal=63%
BIOCARTA_NO1_PATHWAY	19	-0.361025	-1.14162	0.277559	1	1	2547	tags=42%, list=24%, signal=55%
JISON_SICKLE_CELL_DISEASE_DN	94	-0.317308	-1.16429	0.280392	1	1	2871	tags=40%, list=27%, signal=55%
REACTOME_ACTIVATION_OF_THE_MRNA_UPON_BINDING_OF_THE_CAP_BINDING_COMPLEX_AND_EIFS_AND_SUBSEQUENT_BINDING_TO_43S	36	-0.50236	-1.28191	0.281496	1	1	3529	tags=69%, list=33%, signal=103%
KEGG_PYRUVATE_METABOLISM	24	-0.389161	-1.16757	0.281496	1	1	2207	tags=42%, list=20%, signal=52%
FONTAINE_THYROID_TUMOR_UNCERTAIN_MALIGNANCY_UP	21	-0.331491	-1.1276	0.283433	1	1	1624	tags=29%, list=15%, signal=34%
PID_LKB1_PATHWAY	28	-0.346013	-1.15828	0.284254	1	1	2983	tags=43%, list=28%, signal=59%
KAYO_CALORIE_RESTRICTION_MUSCLE_UP	47	-0.330702	-1.1488	0.286822	1	1	2954	tags=47%, list=27%, signal=64%
NIKOLSKY_BREAST_CANCER_1Q21_AMPLICON	24	-0.484038	-1.20924	0.29207	1	1	1934	tags=46%, list=18%, signal=56%
WEIGEL_OXIDATIVE_STRESS_BY_HNE_AND_H2O2	25	-0.348	-1.14703	0.295316	1	1	1505	tags=20%, list=14%, signal=23%
PID_ECADHERIN_KERATINOCYTE_PATHWAY	16	-0.393372	-1.12153	0.296296	1	1	2194	tags=38%, list=20%, signal=47%
WONG_MITOCHONDRIA_GENE_MODULE	132	-0.377003	-1.19706	0.296875	1	1	3759	tags=58%, list=35%, signal=87%
BIOCARTA_VIP_PATHWAY	17	-0.396675	-1.16819	0.300203	1	1	1188	tags=24%, list=11%, signal=26%
LUI_THYROID_CANCER_PAX8_PPARG_DN	33	-0.36586	-1.15263	0.301527	1	1	3416	tags=55%, list=32%, signal=79%
BOYAULT_LIVER_CANCER_SUBCLASS_G3_DN	27	-0.336082	-1.12128	0.302469	1	1	2362	tags=37%, list=22%, signal=47%
REACTOME_FRS2_MEDIATED_CASCADE	17	-0.396592	-1.14122	0.303605	1	1	1743	tags=35%, list=16%, signal=42%
AIYAR_COBRA1_TARGETS_UP	21	-0.345613	-1.09829	0.304	1	1	1392	tags=24%, list=13%, signal=27%
CHEBOTAEV_GR_TARGETS_DN	70	-0.276347	-1.08829	0.310838	1	1	2904	tags=40%, list=27%, signal=54%
REACTOME_KERATAN_SULFATE_BIOSYNTHESIS	16	-0.384111	-1.1078	0.311508	1	1	2338	tags=38%, list=22%, signal=48%
YANAGIHARA_ESX1_TARGETS	18	-0.382647	-1.1269	0.313373	1	1	785	tags=22%, list=7%, signal=24%
PID_TAP63_PATHWAY	31	-0.319712	-1.10038	0.313492	1	1	1013	tags=19%, list=9%, signal=21%
CHANGOLKAR_H2AFY_TARGETS_UP	31	-0.300626	-1.09608	0.315678	1	1	2015	tags=32%, list=19%, signal=40%
STARK_HYPPOCAMPUS_22Q11_DELETION_UP	34	-0.327913	-1.11892	0.318	1	1	3213	tags=53%, list=30%, signal=75%
REACTOME_METABOLISM_OF_MRNA	123	-0.346095	-1.16623	0.319231	1	1	3135	tags=48%, list=29%, signal=67%
SENESE_HDAC1_TARGETS_DN	141	-0.251723	-1.09357	0.322176	1	1	2345	tags=30%, list=22%, signal=38%
KEGG_ADHERENS_JUNCTION	43	-0.311281	-1.10484	0.322245	1	1	2793	tags=37%, list=26%, signal=50%
BIOCARTA_IGF1R_PATHWAY	15	-0.368726	-1.10498	0.323108	1	1	1124	tags=20%, list=10%, signal=22%
PID_AVB3_INTEGRIN_PATHWAY	37	-0.345208	-1.11506	0.32582	1	1	2589	tags=35%, list=24%, signal=46%
LI_WILMS_TUMOR_VS_FETAL_KIDNEY_2_DN	31	-0.324733	-1.11406	0.326693	1	1	483	tags=13%, list=4%, signal=13%
PASQUALUCCI_LYMPHOMA_BY_GC_STAGE_UP	146	-0.240668	-1.06481	0.32681	1	1	3223	tags=42%, list=30%, signal=59%
PID_RET_PATHWAY	19	-0.373955	-1.11978	0.327122	1	1	258	tags=16%, list=2%, signal=16%
ZIRN_TRETINOIN_RESPONSE_WT1_UP	15	-0.357956	-1.08725	0.327801	1	1	1626	tags=27%, list=15%, signal=31%
KORKOLA_EMBRYONAL_CARCINOMA_UP	21	-0.390285	-1.11963	0.329389	1	1	2645	tags=48%, list=24%, signal=63%
MOOTHA_HUMAN_MITODB_6_2002	264	-0.302759	-1.1193	0.329412	1	1	3483	tags=45%, list=32%, signal=64%
ASTON_MAJOR_DEPRESSIVE_DISORDER_UP	23	-0.376116	-1.10563	0.33	1	1	1347	tags=30%, list=12%, signal=35%
LIEN_BREAST_CARCINOMA_METAPLASTIC_VS_DUCTAL_DN	61	-0.336551	-1.10365	0.33	1	1	2192	tags=33%, list=20%, signal=41%
REACTOME_ACTIVATION_OF_KAINATE_RECEPTORS_UPON_GLUTAMATE_BINDING	23	-0.332214	-1.09953	0.33195	1	1	460	tags=17%, list=4%, signal=18%
BURTON_ADIPOGENESIS_11	37	-0.40516	-1.15205	0.332632	1	1	2803	tags=43%, list=26%, signal=58%
FLECHNER_BIOPSY_KIDNEY_TRANSPLANT_REJECTED_VS_OK_DN	318	-0.238301	-1.06365	0.333333	1	1	2566	tags=30%, list=24%, signal=38%
REACTOME_DOWNSTREAM_SIGNALING_OF_ACTIVATED_FGFR	48	-0.2807	-1.06176	0.334	1	1	1767	tags=23%, list=16%, signal=27%
LIAO_HAVE_SOX4_BINDING_SITES	27	-0.334838	-1.12789	0.334719	1	1	1126	tags=22%, list=10%, signal=25%
REACTOME_METABOLISM_OF_PROTEINS	262	-0.28277	-1.09789	0.335354	1	1	3035	tags=40%, list=28%, signal=55%
LEE_AGING_MUSCLE_DN	25	-0.364385	-1.1113	0.336595	1	1	2313	tags=44%, list=21%, signal=56%
QI_PLASMACYTOMA_DN	55	-0.29354	-1.08282	0.336614	1	1	2684	tags=35%, list=25%, signal=46%
JI_METASTASIS_REPRESSED_BY_STK11	15	-0.384971	-1.08156	0.338057	1	1	2647	tags=60%, list=24%, signal=79%
YAO_TEMPORAL_RESPONSE_TO_PROGESTERONE_CLUSTER_13	96	-0.3435	-1.13298	0.34236	1	1	2258	tags=32%, list=21%, signal=40%
STARK_PREFRONTAL_CORTEX_22Q11_DELETION_DN	278	-0.283076	-1.11246	0.342967	1	1	2713	tags=33%, list=25%, signal=43%
DAVICIONI_PAX_FOXO1_SIGNATURE_IN_ARMS_DN	17	-0.401472	-1.09783	0.343621	1	1	3156	tags=65%, list=29%, signal=91%
REACTOME_METABOLISM_OF_RNA	145	-0.323776	-1.13454	0.344961	1	1	2777	tags=41%, list=26%, signal=54%
REACTOME_PI_3K_CASCADE	25	-0.332109	-1.08609	0.345309	1	1	2081	tags=28%, list=19%, signal=35%
BIOCARTA_NFAT_PATHWAY	33	-0.293678	-1.05369	0.345631	1	1	1188	tags=15%, list=11%, signal=17%
PID_HDAC_CLASSIII_PATHWAY	16	-0.3748	-1.08671	0.347475	1	1	2796	tags=50%, list=26%, signal=67%
REACTOME_PI3K_CASCADE	39	-0.295076	-1.07562	0.347913	1	1	3161	tags=38%, list=29%, signal=54%
RUAN_RESPONSE_TO_TNF_TROGLITAZONE_DN	28	-0.294815	-1.06828	0.352	1	1	869	tags=18%, list=8%, signal=19%
SHIN_B_CELL_LYMPHOMA_CLUSTER_7	18	-0.356503	-1.07021	0.352941	1	1	2337	tags=33%, list=22%, signal=42%
LAIHO_COLORECTAL_CANCER_SERRATED_DN	50	-0.309878	-1.09069	0.35343	1	1	2950	tags=34%, list=27%, signal=47%
RAMASWAMY_METASTASIS_UP	46	-0.303788	-1.07359	0.359375	1	1	1139	tags=24%, list=11%, signal=27%
WALLACE_PROSTATE_CANCER_UP	16	-0.390452	-1.08512	0.359615	1	1	869	tags=25%, list=8%, signal=27%
LOCKWOOD_AMPLIFIED_IN_LUNG_CANCER	128	-0.277707	-1.08815	0.36345	1	1	2194	tags=30%, list=20%, signal=38%
DANG_REGULATED_BY_MYC_UP	39	-0.315027	-1.07565	0.363813	1	1	1206	tags=23%, list=11%, signal=26%
DOANE_RESPONSE_TO_ANDROGEN_UP	107	-0.263718	-1.0722	0.363817	1	1	2332	tags=31%, list=22%, signal=39%
WEST_ADRENOCORTICAL_TUMOR_DN	318	-0.241124	-1.04127	0.365657	1	1	3041	tags=37%, list=28%, signal=50%
HUNSBERGER_EXERCISE_REGULATED_GENES	19	-0.361406	-1.07866	0.365805	1	1	3115	tags=47%, list=29%, signal=66%
FIGUEROA_AML_METHYLATION_CLUSTER_6_UP	71	-0.251339	-1.04422	0.366255	1	1	2107	tags=31%, list=19%, signal=38%
XU_AKT1_TARGETS_6HR	15	-0.421725	-1.08343	0.36646	1	1	2475	tags=33%, list=23%, signal=43%
PID_HEDGEHOG_2PATHWAY	16	-0.368035	-1.07269	0.366876	1	1	2319	tags=38%, list=21%, signal=48%
TOMLINS_PROSTATE_CANCER_DN	26	-0.33234	-1.05831	0.367063	1	1	1312	tags=15%, list=12%, signal=17%
TERAO_AOX4_TARGETS_SKIN_UP	20	-0.344809	-1.07067	0.368421	1	1	1962	tags=30%, list=18%, signal=37%
REACTOME_NITRIC_OXIDE_STIMULATES_GUANYLATE_CYCLASE	16	-0.388029	-1.07644	0.368932	1	1	1128	tags=38%, list=10%, signal=42%
REACTOME_PLC_BETA_MEDIATED_EVENTS	24	-0.299069	-1.04448	0.373494	1	1	1401	tags=21%, list=13%, signal=24%
REACTOME_L1CAM_INTERACTIONS	38	-0.293547	-1.04166	0.375519	1	1	2717	tags=29%, list=25%, signal=39%
LIANG_HEMATOPOIESIS_STEM_CELL_NUMBER_LARGE_VS_TINY_DN	25	-0.314706	-1.06236	0.376782	1	1	2925	tags=48%, list=27%, signal=66%
MOOTHA_MITOCHONDRIA	270	-0.283498	-1.06274	0.378168	1	1	3490	tags=45%, list=32%, signal=64%
LEIN_NEURON_MARKERS	38	-0.303081	-1.04875	0.381526	1	1	2232	tags=34%, list=21%, signal=43%
SUBTIL_PROGESTIN_TARGETS	22	-0.339789	-1.06705	0.382178	1	1	3103	tags=50%, list=29%, signal=70%
LEE_TARGETS_OF_PTCH1_AND_SUFU_UP	29	-0.304516	-1.04122	0.382892	1	1	2645	tags=45%, list=24%, signal=59%
YAGI_AML_RELAPSE_PROGNOSIS	18	-0.359216	-1.05477	0.382979	1	1	1660	tags=33%, list=15%, signal=39%
REACTOME_PYRUVATE_METABOLISM_AND_CITRIC_ACID_TCA_CYCLE	23	-0.353972	-1.04833	0.386275	1	1	2895	tags=48%, list=27%, signal=65%
ROVERSI_GLIOMA_COPY_NUMBER_DN	27	-0.344792	-1.06147	0.3878	1	1	2490	tags=48%, list=23%, signal=62%
REACTOME_IRON_UPTAKE_AND_TRANSPORT	22	-0.342082	-1.05058	0.388889	1	1	3608	tags=45%, list=33%, signal=68%
POMEROY_MEDULLOBLASTOMA_DESMOPLASIC_VS_CLASSIC_UP	33	-0.283051	-1.03857	0.389691	1	1	1610	tags=21%, list=15%, signal=25%
JAIN_NFKB_SIGNALING	37	-0.309493	-1.05216	0.392996	1	1	1636	tags=24%, list=15%, signal=29%
KIM_ALL_DISORDERS_OLIGODENDROCYTE_NUMBER_CORR_UP	423	-0.272387	-1.07449	0.393064	1	1	3078	tags=37%, list=28%, signal=50%
ZWANG_DOWN_BY_2ND_EGF_PULSE	124	-0.261872	-1.04164	0.39666	1	1	3001	tags=38%, list=28%, signal=52%
MOOTHA_FFA_OXYDATION	16	-0.390224	-1.06125	0.398821	1	1	2005	tags=31%, list=19%, signal=38%
BOYAULT_LIVER_CANCER_SUBCLASS_G123_UP	28	-0.345421	-1.04977	0.399202	1	1	1312	tags=25%, list=12%, signal=28%
REACTOME_KERATAN_SULFATE_KERATIN_METABOLISM	18	-0.353516	-1.03513	0.4	1	1	2338	tags=33%, list=22%, signal=42%
ST_DIFFERENTIATION_PATHWAY_IN_PC12_CELLS	22	-0.324769	-1.05439	0.40081	1	1	2146	tags=27%, list=20%, signal=34%
PID_P73PATHWAY	52	-0.270061	-1.02474	0.402344	1	1	1025	tags=19%, list=9%, signal=21%
MARIADASON_REGULATED_BY_HISTONE_ACETYLATION_DN	26	-0.309629	-1.04881	0.402415	1	1	1876	tags=27%, list=17%, signal=32%
GAL_LEUKEMIC_STEM_CELL_UP	83	-0.237259	-1.0259	0.403543	1	1	1599	tags=19%, list=15%, signal=22%
HOWLIN_CITED1_TARGETS_1_DN	19	-0.330982	-1.02126	0.407258	1	1	2509	tags=37%, list=23%, signal=48%
TING_SILENCED_BY_DICER	21	-0.350114	-1.02486	0.408284	1	1	1170	tags=29%, list=11%, signal=32%
HUANG_DASATINIB_RESISTANCE_DN	39	-0.27115	-1.01295	0.409091	1	1	2704	tags=41%, list=25%, signal=54%
KEGG_DORSO_VENTRAL_AXIS_FORMATION	15	-0.356772	-1.0414	0.409804	1	1	2194	tags=33%, list=20%, signal=42%
MIKKELSEN_MEF_ICP_WITH_H3K4ME3_AND_H3K27ME3	25	-0.32369	-1.01817	0.412229	1	1	1061	tags=32%, list=10%, signal=35%
TSENG_ADIPOGENIC_POTENTIAL_DN	27	-0.316885	-1.02956	0.4158	1	1	1936	tags=30%, list=18%, signal=36%
SMITH_TERT_TARGETS_DN	52	-0.268236	-1.0287	0.418651	1	1	2374	tags=31%, list=22%, signal=39%
KEGG_TYROSINE_METABOLISM	31	-0.325121	-1.03548	0.419729	1	1	1563	tags=29%, list=14%, signal=34%
GERHOLD_ADIPOGENESIS_UP	28	-0.305695	-1.03369	0.419776	1	1	1406	tags=29%, list=13%, signal=33%
GRADE_METASTASIS_DN	23	-0.380869	-1.04173	0.420039	1	1	2386	tags=39%, list=22%, signal=50%
LUI_TARGETS_OF_PAX8_PPARG_FUSION	28	-0.342841	-1.03303	0.420233	1	1	3416	tags=54%, list=32%, signal=78%
DEN_INTERACT_WITH_LCA5	16	-0.381255	-1.01769	0.420732	1	1	2691	tags=31%, list=25%, signal=42%
KATSANOU_ELAVL1_TARGETS_UP	92	-0.245186	-1.01375	0.421053	1	1	1508	tags=23%, list=14%, signal=26%
JIANG_HYPOXIA_VIA_VHL	15	-0.365218	-1.03433	0.423077	1	1	3764	tags=60%, list=35%, signal=92%
BREDEMEYER_RAG_SIGNALING_NOT_VIA_ATM_DN	32	-0.26862	-1.02234	0.424603	1	1	327	tags=13%, list=3%, signal=13%
REACTOME_SMOOTH_MUSCLE_CONTRACTION	15	-0.400602	-1.04302	0.425963	1	1	3063	tags=40%, list=28%, signal=56%
KIM_ALL_DISORDERS_CALB1_CORR_UP	309	-0.221732	-1.02305	0.426471	1	1	2576	tags=28%, list=24%, signal=35%
KEGG_INSULIN_SIGNALING_PATHWAY	89	-0.232921	-1.01317	0.426501	1	1	1579	tags=19%, list=15%, signal=22%
MACAEVA_PBMC_RESPONSE_TO_IR	61	-0.281842	-1.02313	0.427984	1	1	1860	tags=31%, list=17%, signal=37%
ZHAN_MULTIPLE_MYELOMA_CD1_DN	19	-0.317427	-1.00708	0.430894	1	1	3129	tags=42%, list=29%, signal=59%
PLASARI_NFIC_TARGETS_BASAL_UP	22	-0.343174	-1.02676	0.431138	1	1	156	tags=14%, list=1%, signal=14%
LANDIS_ERBB2_BREAST_TUMORS_324_DN	96	-0.250408	-1.01432	0.433134	1	1	1597	tags=21%, list=15%, signal=24%
KEGG_BASAL_CELL_CARCINOMA	34	-0.309164	-0.986737	0.434608	1	1	1566	tags=29%, list=14%, signal=34%
VALK_AML_CLUSTER_9	20	-0.34727	-1.01079	0.435701	1	1	1660	tags=35%, list=15%, signal=41%
LIU_PROSTATE_CANCER_UP	50	-0.267103	-1.01193	0.436	1	1	3386	tags=46%, list=31%, signal=67%
REACTOME_YAP1_AND_WWTR1_TAZ_STIMULATED_GENE_EXPRESSION	15	-0.358119	-1.02673	0.439024	1	1	2796	tags=40%, list=26%, signal=54%
WATANABE_COLON_CANCER_MSI_VS_MSS_UP	18	-0.342481	-0.997588	0.439516	1	1	2077	tags=39%, list=19%, signal=48%
ZHAN_MULTIPLE_MYELOMA_HP_DN	25	-0.299095	-0.997721	0.44	1	1	1399	tags=24%, list=13%, signal=27%
LEE_LIVER_CANCER_SURVIVAL_UP	104	-0.269525	-1.01567	0.442231	1	1	2837	tags=35%, list=26%, signal=46%
DAIRKEE_CANCER_PRONE_RESPONSE_E2	20	-0.318545	-1.00288	0.444023	1	1	1959	tags=40%, list=18%, signal=49%
CHESLER_BRAIN_HIGHEST_EXPRESSION	22	-0.301427	-1.01153	0.444211	1	1	1913	tags=27%, list=18%, signal=33%
KEGG_VALINE_LEUCINE_AND_ISOLEUCINE_DEGRADATION	31	-0.331617	-1.02004	0.449597	1	1	2460	tags=39%, list=23%, signal=50%
SMITH_LIVER_CANCER	25	-0.312434	-1.01358	0.449692	1	1	3731	tags=56%, list=34%, signal=85%
SHEDDEN_LUNG_CANCER_GOOD_SURVIVAL_A4	119	-0.220458	-0.987636	0.449799	1	1	1879	tags=24%, list=17%, signal=29%
REACTOME_NGF_SIGNALLING_VIA_TRKA_FROM_THE_PLASMA_MEMBRANE	70	-0.255481	-0.99793	0.451681	1	1	1816	tags=23%, list=17%, signal=27%
YANG_BREAST_CANCER_ESR1_LASER_DN	33	-0.325689	-1.02439	0.452747	1	1	3598	tags=55%, list=33%, signal=81%
STEARMAN_LUNG_CANCER_EARLY_VS_LATE_UP	69	-0.248504	-0.972414	0.45567	1	1	2848	tags=35%, list=26%, signal=47%
REACTOME_PLATELET_HOMEOSTASIS	45	-0.265344	-0.988009	0.456814	1	1	1401	tags=24%, list=13%, signal=28%
ZHAN_MULTIPLE_MYELOMA_CD2_DN	24	-0.296099	-1.00734	0.461386	1	1	869	tags=17%, list=8%, signal=18%
PID_CDC42_REG_PATHWAY	20	-0.308049	-0.99073	0.462012	1	1	1876	tags=35%, list=17%, signal=42%
PATIL_LIVER_CANCER	394	-0.223616	-0.979976	0.462322	1	1	3078	tags=34%, list=28%, signal=46%
VANTVEER_BREAST_CANCER_ESR1_UP	98	-0.238836	-0.988266	0.465839	1	1	1489	tags=19%, list=14%, signal=22%
BOYLAN_MULTIPLE_MYELOMA_C_DN	32	-0.288588	-0.980411	0.467672	1	1	1701	tags=25%, list=16%, signal=30%
CHICAS_RB1_TARGETS_LOW_SERUM	54	-0.28543	-0.983901	0.468691	1	1	3112	tags=44%, list=29%, signal=62%
REACTOME_CA_DEPENDENT_EVENTS	16	-0.325482	-1.00023	0.469636	1	1	1401	tags=25%, list=13%, signal=29%
REACTOME_NEGATIVE_REGULATION_OF_FGFR_SIGNALING	18	-0.330313	-0.977516	0.470588	1	1	1812	tags=28%, list=17%, signal=33%
NOUZOVA_TRETINOIN_AND_H4_ACETYLATION	82	-0.227661	-0.976507	0.47166	1	1	2664	tags=32%, list=25%, signal=42%
TURASHVILI_BREAST_LOBULAR_CARCINOMA_VS_DUCTAL_NORMAL_DN	47	-0.291317	-0.969537	0.473684	1	1	2188	tags=32%, list=20%, signal=40%
ZWANG_EGF_INTERVAL_UP	48	-0.27591	-0.985257	0.473896	1	1	1484	tags=25%, list=14%, signal=29%
GYORFFY_MITOXANTRONE_RESISTANCE	37	-0.278079	-0.983054	0.47495	1	1	1114	tags=22%, list=10%, signal=24%
SANA_TNF_SIGNALING_DN	52	-0.259147	-0.961019	0.47495	1	1	1342	tags=21%, list=12%, signal=24%
HSIAO_HOUSEKEEPING_GENES	218	-0.270129	-0.973823	0.47619	1	1	3147	tags=42%, list=29%, signal=58%
TURASHVILI_BREAST_LOBULAR_CARCINOMA_VS_LOBULAR_NORMAL_UP	52	-0.297032	-0.970566	0.478439	1	1	3203	tags=46%, list=30%, signal=65%
REACTOME_SIGNALING_BY_FGFR	55	-0.254055	-0.980905	0.47992	1	1	1812	tags=22%, list=17%, signal=26%
CHAUHAN_RESPONSE_TO_METHOXYESTRADIOL_UP	32	-0.325083	-0.999609	0.480573	1	1	2263	tags=38%, list=21%, signal=47%
FRASOR_RESPONSE_TO_ESTRADIOL_UP	24	-0.289677	-0.971442	0.48125	1	1	2458	tags=42%, list=23%, signal=54%
DAIRKEE_CANCER_PRONE_RESPONSE_BPA	32	-0.301435	-0.964797	0.484787	1	1	570	tags=16%, list=5%, signal=16%
FAELT_B_CLL_WITH_VH_REARRANGEMENTS_DN	23	-0.306032	-0.970555	0.4875	1	1	2013	tags=30%, list=19%, signal=37%
ROSS_AML_WITH_PML_RARA_FUSION	38	-0.2729	-0.97346	0.487854	1	1	2498	tags=26%, list=23%, signal=34%
KONDO_COLON_CANCER_HCP_WITH_H3K27ME1	17	-0.338398	-0.969228	0.490683	1	1	2258	tags=35%, list=21%, signal=45%
REACTOME_TRANSCRIPTIONAL_ACTIVITY_OF_SMAD2_SMAD3_SMAD4_HETEROTRIMER	18	-0.3377	-0.971419	0.491194	1	1	1081	tags=22%, list=10%, signal=25%
WNT_SIGNALING	55	-0.248038	-0.954758	0.494	1	1	2684	tags=35%, list=25%, signal=46%
NIKOLSKY_BREAST_CANCER_20Q11_AMPLICON	15	-0.420491	-0.995621	0.494094	1	1	2256	tags=40%, list=21%, signal=50%
GUILLAUMOND_KLF10_TARGETS_UP	31	-0.274247	-0.960979	0.49497	1	1	1222	tags=23%, list=11%, signal=25%
LIU_COMMON_CANCER_GENES	39	-0.267806	-0.971326	0.496881	1	1	2257	tags=31%, list=21%, signal=39%
VALK_AML_CLUSTER_7	18	-0.31674	-0.974522	0.49703	1	1	1093	tags=22%, list=10%, signal=25%
KEGG_ARGININE_AND_PROLINE_METABOLISM	29	-0.295761	-0.951313	0.497087	1	1	2207	tags=31%, list=20%, signal=39%
BIOCARTA_CHREBP2_PATHWAY	30	-0.270037	-0.970127	0.497121	1	1	3182	tags=43%, list=29%, signal=61%
BALDWIN_PRKCI_TARGETS_UP	20	-0.325563	-0.964584	0.497881	1	1	863	tags=20%, list=8%, signal=22%
KIM_GERMINAL_CENTER_T_HELPER_DN	15	-0.338439	-0.968537	0.501023	1	1	1790	tags=27%, list=17%, signal=32%
PID_TGFBR_PATHWAY	34	-0.285619	-0.967421	0.502083	1	1	3207	tags=41%, list=30%, signal=58%
ROSS_AML_OF_FAB_M7_TYPE	32	-0.26718	-0.96638	0.506	1	1	1637	tags=34%, list=15%, signal=40%
TIEN_INTESTINE_PROBIOTICS_6HR_UP	39	-0.307369	-0.950012	0.506048	1	1	3460	tags=51%, list=32%, signal=75%
KEGG_VIBRIO_CHOLERAE_INFECTION	30	-0.306313	-0.948272	0.507547	1	1	2792	tags=40%, list=26%, signal=54%
REACTOME_NUCLEAR_EVENTS_KINASE_AND_TRANSCRIPTION_FACTOR_ACTIVATION	15	-0.328486	-0.938405	0.509128	1	1	3182	tags=40%, list=29%, signal=57%
TAKEDA_TARGETS_OF_NUP98_HOXA9_FUSION_8D_UP	87	-0.242973	-0.918085	0.509278	1	1	1255	tags=16%, list=12%, signal=18%
REACTOME_GLUCAGON_SIGNALING_IN_METABOLIC_REGULATION	21	-0.304577	-0.968283	0.510934	1	1	1471	tags=29%, list=14%, signal=33%
POMEROY_MEDULLOBLASTOMA_PROGNOSIS_UP	30	-0.298706	-0.937581	0.512104	1	1	2538	tags=43%, list=23%, signal=56%
NIKOLSKY_BREAST_CANCER_17Q21_Q25_AMPLICON	181	-0.257898	-0.91074	0.512524	1	1	3095	tags=41%, list=29%, signal=56%
GARGALOVIC_RESPONSE_TO_OXIDIZED_PHOSPHOLIPIDS_GREY_DN	34	-0.260784	-0.942704	0.513944	1	1	3375	tags=44%, list=31%, signal=64%
REACTOME_INHIBITION_OF_VOLTAGE_GATED_CA2_CHANNELS_VIA_GBETA_GAMMA_SUBUNITS	15	-0.331101	-0.967988	0.514056	1	1	756	tags=27%, list=7%, signal=29%
VALK_AML_CLUSTER_10	17	-0.334892	-0.947225	0.517857	1	1	1872	tags=35%, list=17%, signal=43%
PID_RAC1_REG_PATHWAY	24	-0.279146	-0.950034	0.518962	1	1	1505	tags=25%, list=14%, signal=29%
CREIGHTON_ENDOCRINE_THERAPY_RESISTANCE_1	277	-0.205514	-0.960462	0.519038	1	1	2461	tags=27%, list=23%, signal=35%
GOBERT_CORE_OLIGODENDROCYTE_DIFFERENTIATION	27	-0.280566	-0.958924	0.521649	1	1	1686	tags=26%, list=16%, signal=31%
DAWSON_METHYLATED_IN_LYMPHOMA_TCL1	38	-0.294877	-0.965819	0.521921	1	1	2382	tags=32%, list=22%, signal=40%
WENG_POR_TARGETS_GLOBAL_DN	15	-0.31967	-0.954042	0.523346	1	1	1738	tags=27%, list=16%, signal=32%
REACTOME_AXON_GUIDANCE	126	-0.221734	-0.936603	0.523711	1	1	2313	tags=25%, list=21%, signal=32%
MATZUK_SPERMATOZOA	58	-0.230559	-0.94952	0.52505	1	1	2877	tags=36%, list=27%, signal=49%
CHEN_LIVER_METABOLISM_QTL_CIS	52	-0.263461	-0.913724	0.529046	1	1	1695	tags=29%, list=16%, signal=34%
REACTOME_PI_METABOLISM	26	-0.297559	-0.943905	0.531568	1	1	3299	tags=42%, list=30%, signal=61%
REACTOME_AMINO_ACID_AND_OLIGOPEPTIDE_SLC_TRANSPORTERS	19	-0.327136	-0.939859	0.532091	1	1	1197	tags=26%, list=11%, signal=30%
KIM_MYCN_AMPLIFICATION_TARGETS_DN	55	-0.257105	-0.956274	0.533333	1	1	2758	tags=35%, list=25%, signal=46%
ROYLANCE_BREAST_CANCER_16Q_COPY_NUMBER_UP	39	-0.306847	-0.926033	0.533849	1	1	1129	tags=21%, list=10%, signal=23%
RASHI_RESPONSE_TO_IONIZING_RADIATION_1	19	-0.322579	-0.939303	0.534137	1	1	3315	tags=53%, list=31%, signal=76%
TONKS_TARGETS_OF_RUNX1_RUNX1T1_FUSION_SUSTAINDED_IN_ERYTHROCYTE_UP	29	-0.282582	-0.959277	0.534161	1	1	994	tags=24%, list=9%, signal=27%
NADLER_OBESITY_DN	32	-0.279868	-0.946436	0.535922	1	1	3428	tags=50%, list=32%, signal=73%
SWEET_KRAS_TARGETS_DN	35	-0.269394	-0.947363	0.537572	1	1	3354	tags=46%, list=31%, signal=66%
CHEN_NEUROBLASTOMA_COPY_NUMBER_GAINS	26	-0.30414	-0.946231	0.537678	1	1	2061	tags=27%, list=19%, signal=33%
FIGUEROA_AML_METHYLATION_CLUSTER_3_UP	80	-0.225459	-0.947967	0.538136	1	1	1548	tags=23%, list=14%, signal=26%
CHUANG_OXIDATIVE_STRESS_RESPONSE_UP	19	-0.302705	-0.939692	0.538462	1	1	3182	tags=47%, list=29%, signal=67%
BURTON_ADIPOGENESIS_4	25	-0.292289	-0.917763	0.53861	1	1	2542	tags=40%, list=23%, signal=52%
EPPERT_LSC_R	23	-0.307316	-0.916535	0.538961	1	1	3051	tags=39%, list=28%, signal=54%
MIKKELSEN_MCV6_HCP_WITH_H3K27ME3	223	-0.23227	-0.930864	0.541833	1	1	1338	tags=21%, list=12%, signal=24%
MEISSNER_BRAIN_ICP_WITH_H3K4ME3	19	-0.301162	-0.932074	0.542683	1	1	408	tags=16%, list=4%, signal=16%
WENDT_COHESIN_TARGETS_UP	18	-0.376312	-0.946048	0.543307	1	1	2434	tags=39%, list=22%, signal=50%
CAIRO_LIVER_DEVELOPMENT_UP	90	-0.232055	-0.942202	0.544148	1	1	863	tags=13%, list=8%, signal=14%
DING_LUNG_CANCER_EXPRESSION_BY_COPY_NUMBER	62	-0.287793	-0.899899	0.54509	1	1	3299	tags=40%, list=30%, signal=58%
KEGG_INOSITOL_PHOSPHATE_METABOLISM	30	-0.266459	-0.933679	0.547094	1	1	3413	tags=40%, list=32%, signal=58%
REACTOME_SYNTHESIS_OF_PA	16	-0.310331	-0.938158	0.548515	1	1	447	tags=19%, list=4%, signal=20%
SESTO_RESPONSE_TO_UV_C8	45	-0.251068	-0.922416	0.548515	1	1	900	tags=20%, list=8%, signal=22%
TURASHVILI_BREAST_DUCTAL_CARCINOMA_VS_LOBULAR_NORMAL_DN	40	-0.281026	-0.92106	0.548654	1	1	2496	tags=35%, list=23%, signal=45%
KAMMINGA_SENESCENCE	22	-0.276641	-0.910508	0.549383	1	1	1770	tags=27%, list=16%, signal=33%
RICKMAN_HEAD_AND_NECK_CANCER_A	58	-0.25651	-0.918218	0.549898	1	1	939	tags=17%, list=9%, signal=19%
RIZ_ERYTHROID_DIFFERENTIATION_CCNE1	17	-0.296473	-0.909609	0.551657	1	1	1070	tags=24%, list=10%, signal=26%
GRADE_COLON_CANCER_UP	486	-0.235258	-0.932806	0.552	1	1	2634	tags=30%, list=24%, signal=37%
YAO_TEMPORAL_RESPONSE_TO_PROGESTERONE_CLUSTER_16	45	-0.27717	-0.911125	0.555118	1	1	1451	tags=24%, list=13%, signal=28%
WATANABE_RECTAL_CANCER_RADIOTHERAPY_RESPONSIVE_UP	60	-0.23293	-0.931435	0.556886	1	1	3126	tags=40%, list=29%, signal=56%
AMBROSINI_FLAVOPIRIDOL_TREATMENT_TP53	59	-0.231999	-0.931557	0.56	1	1	1814	tags=24%, list=17%, signal=28%
REACTOME_DARPP_32_EVENTS	17	-0.309882	-0.927931	0.560575	1	1	3309	tags=41%, list=31%, signal=59%
BOUDOUKHA_BOUND_BY_IGF2BP2	73	-0.230363	-0.917205	0.560606	1	1	1760	tags=22%, list=16%, signal=26%
PARK_HSC_AND_MULTIPOTENT_PROGENITORS	36	-0.251561	-0.923855	0.561077	1	1	1283	tags=17%, list=12%, signal=19%
PHESSE_TARGETS_OF_APC_AND_MBD2_UP	16	-0.32346	-0.92296	0.561644	1	1	1905	tags=38%, list=18%, signal=45%
VANHARANTA_UTERINE_FIBROID_UP	29	-0.295822	-0.914861	0.564211	1	1	1084	tags=21%, list=10%, signal=23%
REACTOME_DEVELOPMENTAL_BIOLOGY	221	-0.203021	-0.932654	0.565815	1	1	1048	tags=15%, list=10%, signal=16%
IIZUKA_LIVER_CANCER_PROGRESSION_G2_G3_UP	16	-0.327373	-0.91818	0.568134	1	1	1651	tags=25%, list=15%, signal=29%
HUMMERICH_SKIN_CANCER_PROGRESSION_DN	68	-0.247351	-0.895767	0.572835	1	1	2435	tags=32%, list=22%, signal=41%
SCHUHMACHER_MYC_TARGETS_UP	48	-0.290427	-0.878458	0.573122	1	1	977	tags=19%, list=9%, signal=21%
APPEL_IMATINIB_RESPONSE	19	-0.348364	-0.897608	0.573146	1	1	1050	tags=26%, list=10%, signal=29%
MEISSNER_ES_ICP_WITH_H3K4ME3	19	-0.300828	-0.925039	0.573705	1	1	2709	tags=42%, list=25%, signal=56%
WANG_TUMOR_INVASIVENESS_DN	133	-0.200367	-0.922095	0.575053	1	1	2861	tags=35%, list=26%, signal=46%
CHIANG_LIVER_CANCER_SUBCLASS_PROLIFERATION_DN	91	-0.27311	-0.917052	0.575884	1	1	2804	tags=33%, list=26%, signal=44%
DANG_MYC_TARGETS_UP	73	-0.265293	-0.878535	0.577381	1	1	2830	tags=44%, list=26%, signal=59%
KAAB_HEART_ATRIUM_VS_VENTRICLE_DN	160	-0.210727	-0.912814	0.577821	1	1	2190	tags=24%, list=20%, signal=30%
REACTOME_TGF_BETA_RECEPTOR_SIGNALING_ACTIVATES_SMADS	16	-0.30361	-0.902531	0.577947	1	1	3511	tags=63%, list=32%, signal=92%
HALMOS_CEBPA_TARGETS_DN	24	-0.291376	-0.908578	0.578411	1	1	1081	tags=25%, list=10%, signal=28%
PID_MTOR_4PATHWAY	44	-0.247019	-0.906486	0.578641	1	1	2857	tags=30%, list=26%, signal=40%
PAPASPYRIDONOS_UNSTABLE_ATEROSCLEROTIC_PLAQUE_DN	29	-0.287446	-0.872909	0.578732	1	1	3686	tags=55%, list=34%, signal=83%
RHODES_CANCER_META_SIGNATURE	43	-0.269396	-0.8797	0.578846	1	1	2580	tags=30%, list=24%, signal=40%
MENSSEN_MYC_TARGETS	32	-0.300112	-0.87593	0.579766	1	1	1321	tags=19%, list=12%, signal=21%
NAGASHIMA_NRG1_SIGNALING_DN	30	-0.278478	-0.89884	0.580321	1	1	2767	tags=37%, list=26%, signal=49%
HOUSTIS_ROS	24	-0.292115	-0.891247	0.582692	1	1	2138	tags=29%, list=20%, signal=36%
HOEGERKORP_CD44_TARGETS_DIRECT_UP	16	-0.313114	-0.91104	0.584016	1	1	3045	tags=44%, list=28%, signal=61%
REACTOME_SIGNALING_BY_FGFR_MUTANTS	23	-0.282448	-0.905329	0.584158	1	1	1743	tags=30%, list=16%, signal=36%
REACTOME_REGULATION_OF_INSULIN_SECRETION_BY_GLUCAGON_LIKE_PEPTIDE1	25	-0.272174	-0.909601	0.585513	1	1	622	tags=16%, list=6%, signal=17%
GAZDA_DIAMOND_BLACKFAN_ANEMIA_PROGENITOR_UP	29	-0.257861	-0.901703	0.585603	1	1	1646	tags=28%, list=15%, signal=32%
CUI_TCF21_TARGETS_UP	15	-0.328654	-0.893141	0.587473	1	1	2704	tags=40%, list=25%, signal=53%
BURTON_ADIPOGENESIS_6	103	-0.230785	-0.890678	0.588349	1	1	2948	tags=39%, list=27%, signal=53%
KIM_ALL_DISORDERS_OLIGODENDROCYTE_NUMBER_CORR_DN	16	-0.304093	-0.900596	0.589212	1	1	1975	tags=38%, list=18%, signal=46%
BHATI_G2M_ARREST_BY_2METHOXYESTRADIOL_DN	77	-0.235541	-0.907219	0.589391	1	1	3035	tags=39%, list=28%, signal=54%
REACTOME_FATTY_ACID_TRIACYLGLYCEROL_AND_KETONE_BODY_METABOLISM	99	-0.220273	-0.918162	0.590437	1	1	1701	tags=20%, list=16%, signal=24%
REACTOME_REGULATION_OF_INSULIN_SECRETION	51	-0.233649	-0.914006	0.592213	1	1	936	tags=16%, list=9%, signal=17%
VERHAAK_GLIOBLASTOMA_NEURAL	68	-0.228037	-0.900539	0.592369	1	1	3314	tags=38%, list=31%, signal=55%
REACTOME_PRE_NOTCH_TRANSCRIPTION_AND_TRANSLATION	15	-0.324012	-0.893331	0.593148	1	1	3360	tags=40%, list=31%, signal=58%
REACTOME_GLUCOSE_METABOLISM	42	-0.251956	-0.889976	0.594758	1	1	405	tags=14%, list=4%, signal=15%
FONTAINE_THYROID_TUMOR_UNCERTAIN_MALIGNANCY_DN	15	-0.338377	-0.890192	0.594796	1	1	431	tags=20%, list=4%, signal=21%
TANAKA_METHYLATED_IN_ESOPHAGEAL_CARCINOMA	63	-0.257658	-0.921415	0.595436	1	1	977	tags=21%, list=9%, signal=23%
BIOCARTA_HDAC_PATHWAY	20	-0.290804	-0.910501	0.595876	1	1	1188	tags=15%, list=11%, signal=17%
SCHAEFFER_PROSTATE_DEVELOPMENT_6HR_DN	281	-0.192229	-0.905691	0.596708	1	1	2863	tags=29%, list=26%, signal=39%
CHESLER_BRAIN_QTL_CIS	36	-0.249881	-0.903392	0.597077	1	1	3517	tags=56%, list=32%, signal=82%
BROWNE_HCMV_INFECTION_16HR_DN	53	-0.240396	-0.869007	0.598802	1	1	3063	tags=34%, list=28%, signal=47%
KOYAMA_SEMA3B_TARGETS_DN	236	-0.182037	-0.92103	0.60575	1	1	2208	tags=24%, list=20%, signal=30%
KUNINGER_IGF1_VS_PDGFB_TARGETS_UP	43	-0.297726	-0.895304	0.607646	1	1	627	tags=21%, list=6%, signal=22%
GUO_HEX_TARGETS_UP	51	-0.241224	-0.875329	0.608961	1	1	1936	tags=24%, list=18%, signal=29%
IVANOVA_HEMATOPOIESIS_EARLY_PROGENITOR	301	-0.182753	-0.918778	0.610136	1	1	3099	tags=33%, list=29%, signal=45%
SOTIRIOU_BREAST_CANCER_GRADE_1_VS_3_DN	32	-0.282393	-0.876473	0.610879	1	1	3931	tags=59%, list=36%, signal=93%
DAVICIONI_PAX_FOXO1_SIGNATURE_IN_ARMS_UP	33	-0.259022	-0.901871	0.612705	1	1	1879	tags=27%, list=17%, signal=33%
CHIANG_LIVER_CANCER_SUBCLASS_CTNNB1_UP	95	-0.215262	-0.902695	0.613924	1	1	2162	tags=24%, list=20%, signal=30%
JIANG_AGING_HYPOTHALAMUS_UP	28	-0.273715	-0.857227	0.614203	1	1	1785	tags=25%, list=16%, signal=30%
MODY_HIPPOCAMPUS_PRENATAL	28	-0.281551	-0.859625	0.615385	1	1	3007	tags=36%, list=28%, signal=49%
IRITANI_MAD1_TARGETS_DN	28	-0.283934	-0.82434	0.615686	1	1	3204	tags=46%, list=30%, signal=66%
TERAMOTO_OPN_TARGETS_CLUSTER_6	16	-0.294058	-0.882433	0.616698	1	1	2399	tags=31%, list=22%, signal=40%
RIZ_ERYTHROID_DIFFERENTIATION_6HR	22	-0.283223	-0.876717	0.61807	1	1	2595	tags=45%, list=24%, signal=60%
DAVICIONI_TARGETS_OF_PAX_FOXO1_FUSIONS_DN	41	-0.263793	-0.886594	0.620123	1	1	3156	tags=44%, list=29%, signal=62%
OUELLET_CULTURED_OVARIAN_CANCER_INVASIVE_VS_LMP_UP	43	-0.251074	-0.876091	0.620482	1	1	2853	tags=28%, list=26%, signal=38%
YAMAZAKI_TCEB3_TARGETS_DN	134	-0.199451	-0.892047	0.621564	1	1	2321	tags=25%, list=21%, signal=31%
REACTOME_NCAM_SIGNALING_FOR_NEURITE_OUT_GROWTH	36	-0.255741	-0.860839	0.622047	1	1	2717	tags=31%, list=25%, signal=41%
GROSS_HYPOXIA_VIA_HIF1A_UP	39	-0.243664	-0.85985	0.622047	1	1	1177	tags=15%, list=11%, signal=17%
KEGG_HISTIDINE_METABOLISM	15	-0.306558	-0.878918	0.622951	1	1	2405	tags=40%, list=22%, signal=51%
PID_HEDGEHOG_GLI_PATHWAY	30	-0.261717	-0.877218	0.625	1	1	2780	tags=37%, list=26%, signal=49%
XU_HGF_TARGETS_REPRESSED_BY_AKT1_DN	55	-0.228747	-0.896198	0.625272	1	1	2407	tags=33%, list=22%, signal=42%
JI_RESPONSE_TO_FSH_UP	48	-0.23207	-0.864842	0.626556	1	1	2564	tags=33%, list=24%, signal=43%
WONG_ENDMETRIUM_CANCER_UP	15	-0.347986	-0.87331	0.628866	1	1	1222	tags=33%, list=11%, signal=38%
ZHAN_MULTIPLE_MYELOMA_HP_UP	28	-0.271136	-0.864758	0.629063	1	1	1894	tags=29%, list=17%, signal=35%
GAJATE_RESPONSE_TO_TRABECTEDIN_UP	38	-0.249743	-0.866665	0.630058	1	1	2143	tags=29%, list=20%, signal=36%
KEGG_CITRATE_CYCLE_TCA_CYCLE	19	-0.305648	-0.841108	0.63035	1	1	3542	tags=53%, list=33%, signal=78%
REACTOME_GLUCAGON_TYPE_LIGAND_RECEPTORS	20	-0.293959	-0.87318	0.630612	1	1	1471	tags=30%, list=14%, signal=35%
LASTOWSKA_COAMPLIFIED_WITH_MYCN	20	-0.307607	-0.842871	0.631263	1	1	2113	tags=25%, list=20%, signal=31%
DACOSTA_UV_RESPONSE_VIA_ERCC3_COMMON_UP	35	-0.248826	-0.883085	0.632184	1	1	3397	tags=40%, list=31%, signal=58%
RORIE_TARGETS_OF_EWSR1_FLI1_FUSION_DN	15	-0.301353	-0.874939	0.633124	1	1	697	tags=20%, list=6%, signal=21%
PID_HDAC_CLASSI_PATHWAY	35	-0.239152	-0.874816	0.633333	1	1	2796	tags=37%, list=26%, signal=50%
WEIGEL_OXIDATIVE_STRESS_RESPONSE	20	-0.291954	-0.843157	0.633333	1	1	2136	tags=40%, list=20%, signal=50%
KINSEY_TARGETS_OF_EWSR1_FLII_FUSION_DN	188	-0.207028	-0.87864	0.63473	1	1	1640	tags=18%, list=15%, signal=21%
DAVICIONI_RHABDOMYOSARCOMA_PAX_FOXO1_FUSION_UP	31	-0.258521	-0.884228	0.635458	1	1	1922	tags=29%, list=18%, signal=35%
BIOCARTA_BAD_PATHWAY	16	-0.287804	-0.865404	0.636917	1	1	314	tags=13%, list=3%, signal=13%
JEPSEN_SMRT_TARGETS	20	-0.270223	-0.85339	0.637427	1	1	1598	tags=25%, list=15%, signal=29%
WALLACE_PROSTATE_CANCER_RACE_DN	42	-0.243094	-0.895847	0.638171	1	1	3159	tags=43%, list=29%, signal=60%
MIKKELSEN_MEF_HCP_WITH_H3_UNMETHYLATED	122	-0.220281	-0.89307	0.641393	1	1	1390	tags=21%, list=13%, signal=24%
REACTOME_ACTIVATED_NOTCH1_TRANSMITS_SIGNAL_TO_THE_NUCLEUS	17	-0.287758	-0.858777	0.645291	1	1	3653	tags=47%, list=34%, signal=71%
GRUETZMANN_PANCREATIC_CANCER_DN	120	-0.205364	-0.895174	0.645349	1	1	2868	tags=33%, list=26%, signal=45%
LI_PROSTATE_CANCER_EPIGENETIC	16	-0.295836	-0.888234	0.645349	1	1	2645	tags=31%, list=24%, signal=41%
TIEN_INTESTINE_PROBIOTICS_24HR_DN	134	-0.203821	-0.843177	0.645914	1	1	3143	tags=36%, list=29%, signal=50%
PID_WNT_SIGNALING_PATHWAY	18	-0.29449	-0.834201	0.646245	1	1	3257	tags=61%, list=30%, signal=87%
KEGG_MELANOGENESIS	59	-0.219288	-0.876854	0.647287	1	1	1566	tags=22%, list=14%, signal=26%
MEISSNER_NPC_HCP_WITH_H3K27ME3	43	-0.249934	-0.85757	0.647423	1	1	1004	tags=19%, list=9%, signal=20%
REACTOME_MAPK_TARGETS_NUCLEAR_EVENTS_MEDIATED_BY_MAP_KINASES	19	-0.268851	-0.861569	0.648	1	1	1816	tags=26%, list=17%, signal=32%
SANA_RESPONSE_TO_IFNG_DN	48	-0.244186	-0.829552	0.650295	1	1	2699	tags=31%, list=25%, signal=41%
ZHAN_MULTIPLE_MYELOMA_MS_UP	29	-0.264961	-0.8641	0.651163	1	1	3061	tags=45%, list=28%, signal=62%
MARCHINI_TRABECTEDIN_RESISTANCE_DN	27	-0.278321	-0.851916	0.654224	1	1	2081	tags=30%, list=19%, signal=37%
WANG_CLIM2_TARGETS_UP	142	-0.18928	-0.900262	0.655319	1	1	2847	tags=29%, list=26%, signal=39%
KASLER_HDAC7_TARGETS_2_DN	21	-0.291766	-0.84815	0.658252	1	1	2566	tags=38%, list=24%, signal=50%
PID_PS1_PATHWAY	30	-0.240381	-0.853628	0.659184	1	1	1564	tags=20%, list=14%, signal=23%
TAKAO_RESPONSE_TO_UVB_RADIATION_UP	44	-0.259212	-0.789677	0.660305	1	1	3215	tags=36%, list=30%, signal=52%
REACTOME_GLYCOSPHINGOLIPID_METABOLISM	23	-0.291275	-0.834438	0.660784	1	1	1791	tags=26%, list=17%, signal=31%
LINDVALL_IMMORTALIZED_BY_TERT_DN	46	-0.245287	-0.838453	0.661943	1	1	1342	tags=20%, list=12%, signal=22%
ROSS_AML_WITH_MLL_FUSIONS	41	-0.250805	-0.828326	0.662	1	1	2234	tags=27%, list=21%, signal=34%
GRYDER_PAX3FOXO1_TOP_ENHANCERS	244	-0.187099	-0.878834	0.663793	1	1	2908	tags=32%, list=27%, signal=43%
REACTOME_PRE_NOTCH_EXPRESSION_AND_PROCESSING	28	-0.247102	-0.846612	0.664516	1	1	354	tags=11%, list=3%, signal=11%
PID_SMAD2_3NUCLEAR_PATHWAY	44	-0.234545	-0.86823	0.664557	1	1	615	tags=14%, list=6%, signal=14%
GARGALOVIC_RESPONSE_TO_OXIDIZED_PHOSPHOLIPIDS_MAGENTA_UP	16	-0.311188	-0.815657	0.665323	1	1	1699	tags=31%, list=16%, signal=37%
REACTOME_AQUAPORIN_MEDIATED_TRANSPORT	29	-0.240825	-0.854378	0.666667	1	1	460	tags=14%, list=4%, signal=14%
PID_BMP_PATHWAY	26	-0.26355	-0.848744	0.667347	1	1	1081	tags=19%, list=10%, signal=21%
KEGG_SELENOAMINO_ACID_METABOLISM	18	-0.27821	-0.838859	0.670103	1	1	2405	tags=28%, list=22%, signal=36%
KEGG_ALANINE_ASPARTATE_AND_GLUTAMATE_METABOLISM	16	-0.292942	-0.855612	0.672584	1	1	1429	tags=31%, list=13%, signal=36%
WANG_TUMOR_INVASIVENESS_UP	232	-0.189159	-0.850559	0.673624	1	1	2925	tags=31%, list=27%, signal=42%
LANDIS_ERBB2_BREAST_TUMORS_65_DN	23	-0.263681	-0.838073	0.67418	1	1	3394	tags=48%, list=31%, signal=70%
REACTOME_DAG_AND_IP3_SIGNALING	16	-0.283753	-0.857284	0.674651	1	1	1188	tags=19%, list=11%, signal=21%
BRUINS_UVC_RESPONSE_EARLY_LATE	168	-0.186724	-0.873961	0.675097	1	1	1603	tags=17%, list=15%, signal=20%
REACTOME_PI3K_AKT_ACTIVATION	18	-0.273112	-0.803744	0.67623	1	1	2081	tags=22%, list=19%, signal=27%
GAUSSMANN_MLL_AF4_FUSION_TARGETS_A_UP	106	-0.203573	-0.844875	0.676955	1	1	2344	tags=25%, list=22%, signal=31%
CAFFAREL_RESPONSE_TO_THC_24HR_5_DN	30	-0.248407	-0.831782	0.678227	1	1	1211	tags=20%, list=11%, signal=22%
MOREAUX_B_LYMPHOCYTE_MATURATION_BY_TACI_UP	53	-0.236749	-0.836987	0.679061	1	1	1876	tags=25%, list=17%, signal=30%
ASTON_MAJOR_DEPRESSIVE_DISORDER_DN	97	-0.1981	-0.875988	0.680525	1	1	2615	tags=32%, list=24%, signal=42%
JOSEPH_RESPONSE_TO_SODIUM_BUTYRATE_DN	34	-0.252294	-0.86863	0.680851	1	1	2092	tags=35%, list=19%, signal=44%
NIKOLSKY_BREAST_CANCER_7Q21_Q22_AMPLICON	37	-0.269603	-0.794178	0.681159	1	1	3027	tags=32%, list=28%, signal=45%
WEINMANN_ADAPTATION_TO_HYPOXIA_UP	20	-0.283403	-0.853171	0.682186	1	1	3373	tags=50%, list=31%, signal=72%
BURTON_ADIPOGENESIS_5	76	-0.239011	-0.816389	0.68242	1	1	3539	tags=46%, list=33%, signal=68%
BIOCARTA_CARM_ER_PATHWAY	18	-0.26798	-0.847466	0.683778	1	1	1814	tags=28%, list=17%, signal=33%
ZHANG_TLX_TARGETS_60HR_UP	179	-0.197816	-0.833772	0.684418	1	1	1760	tags=22%, list=16%, signal=26%
LI_WILMS_TUMOR_VS_FETAL_KIDNEY_2_UP	21	-0.27259	-0.808628	0.685039	1	1	829	tags=14%, list=8%, signal=15%
NABA_COLLAGENS	28	-0.275238	-0.778883	0.685072	1	1	1732	tags=25%, list=16%, signal=30%
REACTOME_PROTEIN_FOLDING	37	-0.236048	-0.82451	0.685499	1	1	1283	tags=22%, list=12%, signal=24%
REACTOME_CLASS_B_2_SECRETIN_FAMILY_RECEPTORS	48	-0.255766	-0.864011	0.686598	1	1	1471	tags=27%, list=14%, signal=31%
BAKKER_FOXO3_TARGETS_DN	99	-0.203984	-0.837105	0.688588	1	1	2059	tags=20%, list=19%, signal=25%
NIKOLSKY_BREAST_CANCER_8Q12_Q22_AMPLICON	69	-0.253804	-0.761433	0.688797	1	1	3171	tags=46%, list=29%, signal=65%
MARTORIATI_MDM4_TARGETS_NEUROEPITHELIUM_UP	95	-0.203496	-0.836604	0.688976	1	1	1651	tags=20%, list=15%, signal=23%
YAGI_AML_SURVIVAL	67	-0.205469	-0.863709	0.689024	1	1	1660	tags=19%, list=15%, signal=23%
KEGG_HEDGEHOG_SIGNALING_PATHWAY	33	-0.252991	-0.811934	0.690083	1	1	1359	tags=21%, list=13%, signal=24%
KUMAR_AUTOPHAGY_NETWORK	37	-0.223051	-0.857899	0.692464	1	1	2658	tags=35%, list=25%, signal=46%
CHANDRAN_METASTASIS_TOP50_UP	18	-0.279434	-0.82261	0.693252	1	1	1876	tags=28%, list=17%, signal=34%
PUIFFE_INVASION_INHIBITED_BY_ASCITES_DN	84	-0.219747	-0.814991	0.693416	1	1	2041	tags=24%, list=19%, signal=29%
REACTOME_SULFUR_AMINO_ACID_METABOLISM	17	-0.271042	-0.831851	0.693833	1	1	366	tags=12%, list=3%, signal=12%
NUTT_GBM_VS_AO_GLIOMA_DN	22	-0.290457	-0.78561	0.695391	1	1	3414	tags=50%, list=32%, signal=73%
YAO_TEMPORAL_RESPONSE_TO_PROGESTERONE_CLUSTER_17	107	-0.228374	-0.765825	0.697143	1	1	2755	tags=27%, list=25%, signal=36%
LEE_LIVER_CANCER	28	-0.322767	-0.825668	0.697154	1	1	1521	tags=32%, list=14%, signal=37%
GINESTIER_BREAST_CANCER_ZNF217_AMPLIFIED_DN	188	-0.235157	-0.776962	0.697266	1	1	2980	tags=36%, list=28%, signal=49%
BHAT_ESR1_TARGETS_VIA_AKT1_DN	45	-0.22781	-0.848198	0.698312	1	1	2483	tags=31%, list=23%, signal=40%
OUILLETTE_CLL_13Q14_DELETION_UP	35	-0.241406	-0.819825	0.698795	1	1	978	tags=17%, list=9%, signal=19%
COWLING_MYCN_TARGETS	23	-0.271034	-0.834578	0.699219	1	1	2026	tags=35%, list=19%, signal=43%
KEGG_AMINO_SUGAR_AND_NUCLEOTIDE_SUGAR_METABOLISM	28	-0.254867	-0.806969	0.699234	1	1	2687	tags=32%, list=25%, signal=43%
VANTVEER_BREAST_CANCER_METASTASIS_UP	34	-0.242635	-0.829888	0.699597	1	1	1597	tags=24%, list=15%, signal=28%
SPIELMAN_LYMPHOBLAST_EUROPEAN_VS_ASIAN_UP	291	-0.207809	-0.778681	0.700565	1	1	2084	tags=22%, list=19%, signal=27%
REACTOME_TRAF6_MEDIATED_INDUCTION_OF_NFKB_AND_MAP_KINASES_UPON_TLR7_8_OR_9_ACTIVATION	44	-0.218517	-0.828748	0.700576	1	1	1816	tags=23%, list=17%, signal=27%
REACTOME_TRANSCRIPTIONAL_REGULATION_OF_WHITE_ADIPOCYTE_DIFFERENTIATION	47	-0.217625	-0.840555	0.700971	1	1	929	tags=15%, list=9%, signal=16%
PENG_GLUTAMINE_DEPRIVATION_UP	23	-0.250436	-0.831823	0.700971	1	1	737	tags=13%, list=7%, signal=14%
SESTO_RESPONSE_TO_UV_C6	22	-0.272077	-0.80747	0.70101	1	1	3103	tags=41%, list=29%, signal=57%
TAVOR_CEBPA_TARGETS_DN	18	-0.284952	-0.819766	0.70155	1	1	1630	tags=22%, list=15%, signal=26%
REACTOME_ION_TRANSPORT_BY_P_TYPE_ATPASES	17	-0.282838	-0.812591	0.702586	1	1	1823	tags=24%, list=17%, signal=28%
BOQUEST_STEM_CELL_UP	139	-0.220376	-0.772282	0.704501	1	1	2393	tags=32%, list=22%, signal=41%
KIM_ALL_DISORDERS_DURATION_CORR_DN	88	-0.244108	-0.754661	0.705078	1	1	3078	tags=34%, list=28%, signal=47%
BASAKI_YBX1_TARGETS_DN	212	-0.194141	-0.834073	0.705761	1	1	2677	tags=29%, list=25%, signal=37%
CHEBOTAEV_GR_TARGETS_UP	35	-0.241847	-0.816161	0.707217	1	1	3386	tags=43%, list=31%, signal=62%
KIM_WT1_TARGETS_12HR_UP	99	-0.203632	-0.85264	0.70751	1	1	2188	tags=26%, list=20%, signal=33%
PECE_MAMMARY_STEM_CELL_UP	81	-0.224891	-0.705779	0.708661	1	1	3425	tags=49%, list=32%, signal=72%
KEGG_PORPHYRIN_AND_CHLOROPHYLL_METABOLISM	15	-0.290078	-0.82999	0.710476	1	1	1385	tags=27%, list=13%, signal=31%
YAO_TEMPORAL_RESPONSE_TO_PROGESTERONE_CLUSTER_0	48	-0.227339	-0.819216	0.710638	1	1	1699	tags=27%, list=16%, signal=32%
KEGG_VASOPRESSIN_REGULATED_WATER_REABSORPTION	22	-0.253687	-0.817639	0.714286	1	1	2859	tags=41%, list=26%, signal=55%
TONKS_TARGETS_OF_RUNX1_RUNX1T1_FUSION_MONOCYTE_UP	126	-0.199417	-0.811186	0.717092	1	1	2717	tags=29%, list=25%, signal=39%
ZAMORA_NOS2_TARGETS_UP	41	-0.238252	-0.750152	0.71869	1	1	3082	tags=34%, list=28%, signal=48%
REACTOME_MRNA_SPLICING	61	-0.226689	-0.753848	0.719758	1	1	1344	tags=16%, list=12%, signal=19%
WANG_HCP_PROSTATE_CANCER	60	-0.206267	-0.857434	0.720648	1	1	142	tags=8%, list=1%, signal=8%
REACTOME_SIGNALING_BY_FGFR_IN_DISEASE	64	-0.205217	-0.830378	0.721344	1	1	1812	tags=20%, list=17%, signal=24%
GRADE_COLON_VS_RECTAL_CANCER_UP	21	-0.255864	-0.800103	0.721757	1	1	2435	tags=29%, list=22%, signal=37%
HIRSCH_CELLULAR_TRANSFORMATION_SIGNATURE_DN	60	-0.206325	-0.831243	0.723404	1	1	2496	tags=23%, list=23%, signal=30%
SIG_REGULATION_OF_THE_ACTIN_CYTOSKELETON_BY_RHO_GTPASES	19	-0.269368	-0.788377	0.727273	1	1	3895	tags=53%, list=36%, signal=82%
KEGG_CALCIUM_SIGNALING_PATHWAY	102	-0.209713	-0.842744	0.727799	1	1	830	tags=14%, list=8%, signal=15%
MARTENS_TRETINOIN_RESPONSE_DN	441	-0.186756	-0.771429	0.727799	1	1	3034	tags=32%, list=28%, signal=43%
BOYAULT_LIVER_CANCER_SUBCLASS_G12_UP	17	-0.264906	-0.793804	0.728571	1	1	2084	tags=29%, list=19%, signal=36%
PID_LYMPH_ANGIOGENESIS_PATHWAY	16	-0.275654	-0.765394	0.729293	1	1	2466	tags=38%, list=23%, signal=48%
BERTUCCI_MEDULLARY_VS_DUCTAL_BREAST_CANCER_DN	104	-0.207414	-0.785884	0.729839	1	1	1598	tags=18%, list=15%, signal=21%
LU_EZH2_TARGETS_UP	162	-0.217764	-0.746477	0.730337	1	1	2223	tags=25%, list=21%, signal=31%
GENTILE_UV_LOW_DOSE_DN	39	-0.229529	-0.789801	0.730769	1	1	2859	tags=36%, list=26%, signal=49%
CREIGHTON_AKT1_SIGNALING_VIA_MTOR_UP	19	-0.287624	-0.73111	0.73221	1	1	4698	tags=63%, list=43%, signal=111%
MODY_HIPPOCAMPUS_POSTNATAL	37	-0.238948	-0.771587	0.732558	1	1	1578	tags=24%, list=15%, signal=28%
REACTOME_NCAM1_INTERACTIONS	24	-0.260153	-0.772227	0.733855	1	1	2463	tags=29%, list=23%, signal=38%
VECCHI_GASTRIC_CANCER_EARLY_DN	208	-0.206711	-0.853124	0.735043	1	1	2213	tags=26%, list=20%, signal=33%
REACTOME_METABOLISM_OF_VITAMINS_AND_COFACTORS	27	-0.242513	-0.80009	0.735812	1	1	2537	tags=30%, list=23%, signal=39%
HAN_JNK_SINGALING_DN	21	-0.265258	-0.80501	0.736514	1	1	2413	tags=38%, list=22%, signal=49%
TURASHVILI_BREAST_DUCTAL_CARCINOMA_VS_DUCTAL_NORMAL_DN	109	-0.212022	-0.790407	0.738589	1	1	2628	tags=32%, list=24%, signal=42%
VERRECCHIA_EARLY_RESPONSE_TO_TGFB1	38	-0.238746	-0.781156	0.738866	1	1	2677	tags=37%, list=25%, signal=49%
KAAB_HEART_ATRIUM_VS_VENTRICLE_UP	158	-0.193012	-0.789617	0.74364	1	1	2361	tags=27%, list=22%, signal=33%
PID_ER_NONGENOMIC_PATHWAY	26	-0.235264	-0.784342	0.744235	1	1	1657	tags=19%, list=15%, signal=23%
SCHLESINGER_METHYLATED_DE_NOVO_IN_CANCER	49	-0.234489	-0.828124	0.744422	1	1	900	tags=18%, list=8%, signal=20%
VERHAAK_GLIOBLASTOMA_PRONEURAL	98	-0.208494	-0.755455	0.747863	1	1	1448	tags=18%, list=13%, signal=21%
SMITH_TERT_TARGETS_UP	88	-0.197253	-0.804442	0.748503	1	1	1601	tags=20%, list=15%, signal=24%
LEIN_MIDBRAIN_MARKERS	49	-0.21134	-0.819241	0.751456	1	1	584	tags=12%, list=5%, signal=13%
WANG_MLL_TARGETS	178	-0.194175	-0.810295	0.751969	1	1	1452	tags=19%, list=13%, signal=21%
NAKAMURA_ADIPOGENESIS_LATE_UP	59	-0.197212	-0.825981	0.756048	1	1	2530	tags=27%, list=23%, signal=35%
BENPORATH_MYC_TARGETS_WITH_EBOX	133	-0.193398	-0.795972	0.756286	1	1	2953	tags=35%, list=27%, signal=47%
LI_DCP2_BOUND_MRNA	53	-0.233266	-0.648003	0.75717	1	1	3473	tags=45%, list=32%, signal=66%
SATO_SILENCED_BY_DEACETYLATION_IN_PANCREATIC_CANCER	28	-0.247222	-0.799671	0.758285	1	1	732	tags=18%, list=7%, signal=19%
JIANG_AGING_HYPOTHALAMUS_DN	28	-0.238116	-0.764392	0.761616	1	1	3721	tags=50%, list=34%, signal=76%
GRAESSMANN_RESPONSE_TO_MC_AND_DOXORUBICIN_DN	429	-0.166381	-0.816845	0.763672	1	1	2856	tags=30%, list=26%, signal=39%
AIYAR_COBRA1_TARGETS_DN	16	-0.259596	-0.76025	0.763747	1	1	310	tags=13%, list=3%, signal=13%
CHANGOLKAR_H2AFY_TARGETS_DN	23	-0.234166	-0.773697	0.767068	1	1	781	tags=13%, list=7%, signal=14%
KARLSSON_TGFB1_TARGETS_DN	124	-0.180024	-0.808597	0.768443	1	1	2566	tags=26%, list=24%, signal=33%
PID_RHOA_REG_PATHWAY	26	-0.232988	-0.750341	0.768763	1	1	1909	tags=27%, list=18%, signal=33%
REACTOME_MRNA_SPLICING_MINOR_PATHWAY	19	-0.255984	-0.736812	0.768932	1	1	668	tags=16%, list=6%, signal=17%
DAZARD_RESPONSE_TO_UV_NHEK_UP	143	-0.201314	-0.732627	0.770874	1	1	2099	tags=26%, list=19%, signal=32%
VANHARANTA_UTERINE_FIBROID_WITH_7Q_DELETION_UP	41	-0.221668	-0.759341	0.772443	1	1	2580	tags=27%, list=24%, signal=35%
FONTAINE_FOLLICULAR_THYROID_ADENOMA_DN	49	-0.210546	-0.79465	0.772901	1	1	1139	tags=16%, list=11%, signal=18%
REACTOME_PROCESSING_OF_CAPPED_INTRONLESS_PRE_MRNA	15	-0.280649	-0.721293	0.774059	1	1	2762	tags=47%, list=26%, signal=63%
KEGG_GAP_JUNCTION	51	-0.210283	-0.807435	0.774379	1	1	1150	tags=18%, list=11%, signal=20%
OXFORD_RALA_OR_RALB_TARGETS_DN	15	-0.268381	-0.773005	0.775591	1	1	7927	tags=100%, list=73%, signal=373%
CHEOK_RESPONSE_TO_HD_MTX_DN	15	-0.268128	-0.741312	0.775794	1	1	291	tags=13%, list=3%, signal=14%
MCBRYAN_PUBERTAL_BREAST_4_5WK_DN	105	-0.190419	-0.841326	0.775967	1	1	3399	tags=39%, list=31%, signal=56%
REACTOME_SIGNALING_BY_TGF_BETA_RECEPTOR_COMPLEX	33	-0.221156	-0.75314	0.778218	1	1	2793	tags=36%, list=26%, signal=49%
ZHONG_RESPONSE_TO_AZACITIDINE_AND_TSA_DN	41	-0.21638	-0.775103	0.780583	1	1	880	tags=15%, list=8%, signal=16%
LANDIS_BREAST_CANCER_PROGRESSION_DN	43	-0.218814	-0.733302	0.780992	1	1	1274	tags=16%, list=12%, signal=18%
GAUSSMANN_MLL_AF4_FUSION_TARGETS_G_UP	128	-0.190033	-0.835453	0.782178	1	1	765	tags=11%, list=7%, signal=12%
REACTOME_G_PROTEIN_ACTIVATION	18	-0.244475	-0.754353	0.782696	1	1	936	tags=17%, list=9%, signal=18%
REACTOME_INTERACTIONS_OF_VPR_WITH_HOST_CELLULAR_PROTEINS	17	-0.261585	-0.727167	0.78481	1	1	8001	tags=100%, list=74%, signal=382%
PID_MAPK_TRK_PATHWAY	18	-0.250358	-0.765769	0.785441	1	1	1297	tags=17%, list=12%, signal=19%
REACTOME_OPIOID_SIGNALLING	47	-0.201384	-0.795028	0.786427	1	1	2098	tags=21%, list=19%, signal=26%
BOYLAN_MULTIPLE_MYELOMA_PCA3_UP	48	-0.209596	-0.817906	0.787018	1	1	1637	tags=21%, list=15%, signal=24%
NING_CHRONIC_OBSTRUCTIVE_PULMONARY_DISEASE_DN	65	-0.204256	-0.780956	0.787645	1	1	2576	tags=26%, list=24%, signal=34%
GINESTIER_BREAST_CANCER_ZNF217_AMPLIFIED_UP	44	-0.23383	-0.71087	0.787942	1	1	2928	tags=32%, list=27%, signal=43%
UDAYAKUMAR_MED1_TARGETS_DN	146	-0.179101	-0.821477	0.789264	1	1	2284	tags=25%, list=21%, signal=32%
PID_SYNDECAN_1_PATHWAY	26	-0.254626	-0.698687	0.789579	1	1	2780	tags=38%, list=26%, signal=52%
RODRIGUES_THYROID_CARCINOMA_POORLY_DIFFERENTIATED_DN	413	-0.174422	-0.814315	0.7897	1	1	2796	tags=29%, list=26%, signal=38%
REACTOME_REGULATION_OF_GLUCOKINASE_BY_GLUCOKINASE_REGULATORY_PROTEIN	16	-0.261561	-0.736636	0.791498	1	1	8001	tags=100%, list=74%, signal=382%
REACTOME_ACTIVATION_OF_GENES_BY_ATF4	15	-0.264034	-0.760469	0.791748	1	1	7974	tags=100%, list=74%, signal=379%
KEGG_SPLICEOSOME	70	-0.205585	-0.712176	0.792757	1	1	2762	tags=30%, list=26%, signal=40%
REACTOME_NEURONAL_SYSTEM	152	-0.187257	-0.822374	0.794059	1	1	1730	tags=20%, list=16%, signal=23%
SCHLOSSER_MYC_AND_SERUM_RESPONSE_SYNERGY	20	-0.30756	-0.680127	0.794821	1	1	3830	tags=50%, list=35%, signal=77%
COLIN_PILOCYTIC_ASTROCYTOMA_VS_GLIOBLASTOMA_DN	17	-0.263104	-0.761002	0.795322	1	1	924	tags=18%, list=9%, signal=19%
HONMA_DOCETAXEL_RESISTANCE	20	-0.245618	-0.699447	0.795367	1	1	3243	tags=35%, list=30%, signal=50%
REACTOME_TRANSPORT_OF_RIBONUCLEOPROTEINS_INTO_THE_HOST_NUCLEUS	15	-0.261537	-0.70956	0.795745	1	1	8001	tags=100%, list=74%, signal=382%
REACTOME_NEP_NS2_INTERACTS_WITH_THE_CELLULAR_EXPORT_MACHINERY	15	-0.261537	-0.698667	0.796715	1	1	8001	tags=100%, list=74%, signal=382%
KEGG_P53_SIGNALING_PATHWAY	40	-0.209966	-0.766036	0.797297	1	1	1646	tags=20%, list=15%, signal=23%
REACTOME_MRNA_PROCESSING	87	-0.199174	-0.698261	0.797571	1	1	2067	tags=21%, list=19%, signal=25%
KEGG_ECM_RECEPTOR_INTERACTION	46	-0.21898	-0.708283	0.8	1	1	1227	tags=17%, list=11%, signal=20%
MARZEC_IL2_SIGNALING_DN	21	-0.238074	-0.725026	0.800425	1	1	1513	tags=24%, list=14%, signal=28%
JUBAN_TARGETS_OF_SPI1_AND_FLI1_DN	57	-0.197393	-0.75335	0.800781	1	1	1111	tags=14%, list=10%, signal=16%
BIOCARTA_TOLL_PATHWAY	21	-0.234948	-0.765476	0.802372	1	1	475	tags=10%, list=4%, signal=10%
STANELLE_E2F1_TARGETS	16	-0.247355	-0.75296	0.802372	1	1	1053	tags=19%, list=10%, signal=21%
LASTOWSKA_NEUROBLASTOMA_COPY_NUMBER_UP	103	-0.195169	-0.702178	0.802789	1	1	3380	tags=43%, list=31%, signal=62%
MORI_EMU_MYC_LYMPHOMA_BY_ONSET_TIME_UP	61	-0.204809	-0.734893	0.803279	1	1	2762	tags=30%, list=26%, signal=39%
ACEVEDO_NORMAL_TISSUE_ADJACENT_TO_LIVER_TUMOR_UP	93	-0.185081	-0.810676	0.803607	1	1	1960	tags=22%, list=18%, signal=26%
LEE_NEURAL_CREST_STEM_CELL_DN	65	-0.206141	-0.773772	0.804622	1	1	2275	tags=29%, list=21%, signal=37%
HOFFMANN_PRE_BI_TO_LARGE_PRE_BII_LYMPHOCYTE_UP	24	-0.231628	-0.777664	0.805221	1	1	1948	tags=33%, list=18%, signal=41%
KEGG_PYRIMIDINE_METABOLISM	53	-0.208701	-0.750989	0.805447	1	1	713	tags=13%, list=7%, signal=14%
HANN_RESISTANCE_TO_BCL2_INHIBITOR_DN	22	-0.252118	-0.750233	0.805882	1	1	3250	tags=45%, list=30%, signal=65%
CORRE_MULTIPLE_MYELOMA_DN	33	-0.222017	-0.750728	0.806452	1	1	2361	tags=33%, list=22%, signal=42%
PID_NECTIN_PATHWAY	15	-0.261741	-0.73399	0.806773	1	1	709	tags=13%, list=7%, signal=14%
NABA_BASEMENT_MEMBRANES	20	-0.251274	-0.701422	0.807453	1	1	900	tags=15%, list=8%, signal=16%
RIZ_ERYTHROID_DIFFERENTIATION_HEMGN	20	-0.235194	-0.709891	0.807611	1	1	623	tags=15%, list=6%, signal=16%
DELPUECH_FOXO3_TARGETS_DN	21	-0.249936	-0.70179	0.807921	1	1	1554	tags=24%, list=14%, signal=28%
LEE_LIVER_CANCER_MYC_UP	33	-0.22942	-0.786075	0.80814	1	1	1894	tags=27%, list=17%, signal=33%
GARGALOVIC_RESPONSE_TO_OXIDIZED_PHOSPHOLIPIDS_GREEN_UP	18	-0.24919	-0.732321	0.808594	1	1	1875	tags=33%, list=17%, signal=40%
ANASTASSIOU_MULTICANCER_INVASIVENESS_SIGNATURE	41	-0.233212	-0.613144	0.809524	1	1	2466	tags=34%, list=23%, signal=44%
DORN_ADENOVIRUS_INFECTION_12HR_UP	21	-0.234044	-0.71678	0.810078	1	1	2029	tags=29%, list=19%, signal=35%
STEIN_ESRRA_TARGETS	296	-0.171892	-0.745374	0.810707	1	1	3168	tags=34%, list=29%, signal=47%
BURTON_ADIPOGENESIS_1	24	-0.234138	-0.719989	0.810976	1	1	1085	tags=17%, list=10%, signal=18%
KEGG_MELANOMA	38	-0.216162	-0.804342	0.811538	1	1	3161	tags=37%, list=29%, signal=52%
KLEIN_PRIMARY_EFFUSION_LYMPHOMA_UP	28	-0.230146	-0.726816	0.815041	1	1	1515	tags=21%, list=14%, signal=25%
SIMBULAN_UV_RESPONSE_IMMORTALIZED_DN	21	-0.256311	-0.720733	0.815195	1	1	900	tags=19%, list=8%, signal=21%
SCHLOSSER_SERUM_RESPONSE_AUGMENTED_BY_MYC	68	-0.197446	-0.670071	0.815739	1	1	3542	tags=37%, list=33%, signal=54%
TONG_INTERACT_WITH_PTTG1	31	-0.217547	-0.725832	0.816162	1	1	2812	tags=42%, list=26%, signal=56%
FIGUEROA_AML_METHYLATION_CLUSTER_4_UP	59	-0.193696	-0.785294	0.821206	1	1	3238	tags=42%, list=30%, signal=60%
NING_CHRONIC_OBSTRUCTIVE_PULMONARY_DISEASE_UP	91	-0.194923	-0.74655	0.821293	1	1	2358	tags=24%, list=22%, signal=31%
CAIRO_HEPATOBLASTOMA_CLASSES_DN	111	-0.190112	-0.743214	0.821497	1	1	2373	tags=28%, list=22%, signal=35%
REACTOME_BMAL1_CLOCK_NPAS2_ACTIVATES_CIRCADIAN_EXPRESSION	19	-0.234751	-0.722632	0.821656	1	1	1414	tags=21%, list=13%, signal=24%
REACTOME_PERK_REGULATED_GENE_EXPRESSION	16	-0.251202	-0.735428	0.821782	1	1	8113	tags=100%, list=75%, signal=398%
PID_A6B1_A6B4_INTEGRIN_PATHWAY	28	-0.228519	-0.754762	0.822581	1	1	8361	tags=100%, list=77%, signal=438%
KAYO_AGING_MUSCLE_DN	67	-0.185434	-0.786088	0.822642	1	1	2911	tags=33%, list=27%, signal=45%
KEGG_PROSTATE_CANCER	49	-0.199148	-0.77179	0.822709	1	1	2194	tags=24%, list=20%, signal=31%
REACTOME_PHOSPHOLIPID_METABOLISM	121	-0.187016	-0.781099	0.823413	1	1	1896	tags=22%, list=18%, signal=27%
SIG_IL4RECEPTOR_IN_B_LYPHOCYTES	17	-0.246137	-0.706638	0.823647	1	1	1265	tags=18%, list=12%, signal=20%
LEE_BMP2_TARGETS_UP	426	-0.179745	-0.787161	0.824017	1	1	2393	tags=28%, list=22%, signal=34%
REACTOME_SIGNALING_BY_PDGF	66	-0.195058	-0.742403	0.82505	1	1	1265	tags=15%, list=12%, signal=17%
YAO_TEMPORAL_RESPONSE_TO_PROGESTERONE_CLUSTER_11	58	-0.19754	-0.698493	0.825743	1	1	3125	tags=34%, list=29%, signal=48%
PID_INSULIN_PATHWAY	26	-0.214583	-0.745323	0.827112	1	1	142	tags=8%, list=1%, signal=8%
HILLION_HMGA1_TARGETS	47	-0.216586	-0.750441	0.827789	1	1	2455	tags=32%, list=23%, signal=41%
KANG_GLIS3_TARGETS	20	-0.264857	-0.747592	0.829317	1	1	622	tags=15%, list=6%, signal=16%
HEDENFALK_BREAST_CANCER_BRCA1_VS_BRCA2	94	-0.182749	-0.748849	0.829365	1	1	483	tags=9%, list=4%, signal=9%
PETRETTO_CARDIAC_HYPERTROPHY	23	-0.230337	-0.681417	0.831349	1	1	2579	tags=30%, list=24%, signal=40%
KEGG_DRUG_METABOLISM_OTHER_ENZYMES	20	-0.248442	-0.729743	0.833002	1	1	1172	tags=20%, list=11%, signal=22%
DARWICHE_PAPILLOMA_RISK_HIGH_DN	87	-0.178424	-0.813142	0.833992	1	1	2369	tags=23%, list=22%, signal=29%
KIM_MYCN_AMPLIFICATION_TARGETS_UP	58	-0.189221	-0.774392	0.834034	1	1	1555	tags=17%, list=14%, signal=20%
RUAN_RESPONSE_TO_TROGLITAZONE_DN	15	-0.248395	-0.732534	0.83432	1	1	524	tags=13%, list=5%, signal=14%
PID_PI3KCI_AKT_PATHWAY	21	-0.227343	-0.706515	0.834694	1	1	2780	tags=24%, list=26%, signal=32%
SMID_BREAST_CANCER_RELAPSE_IN_LUNG_DN	20	-0.24112	-0.685138	0.834694	1	1	3297	tags=40%, list=30%, signal=57%
MOOTHA_PGC	241	-0.172034	-0.688856	0.835317	1	1	3465	tags=40%, list=32%, signal=58%
GOLDRATH_IMMUNE_MEMORY	37	-0.204233	-0.748004	0.836478	1	1	1597	tags=19%, list=15%, signal=22%
KYNG_DNA_DAMAGE_BY_GAMMA_RADIATION	48	-0.199681	-0.767961	0.836653	1	1	1274	tags=15%, list=12%, signal=16%
CHOW_RASSF1_TARGETS_DN	20	-0.237053	-0.674514	0.836978	1	1	2380	tags=25%, list=22%, signal=32%
FLECHNER_PBL_KIDNEY_TRANSPLANT_REJECTED_VS_OK_DN	25	-0.221676	-0.704055	0.838645	1	1	1131	tags=16%, list=10%, signal=18%
REACTOME_MYD88_MAL_CASCADE_INITIATED_ON_PLASMA_MEMBRANE	49	-0.189702	-0.739389	0.839388	1	1	1816	tags=20%, list=17%, signal=24%
CHAUHAN_RESPONSE_TO_METHOXYESTRADIOL_DN	55	-0.200744	-0.675255	0.839851	1	1	1610	tags=18%, list=15%, signal=21%
NIKOLSKY_BREAST_CANCER_16P13_AMPLICON	62	-0.206139	-0.558949	0.840691	1	1	937	tags=11%, list=9%, signal=12%
GAUSSMANN_MLL_AF4_FUSION_TARGETS_G_DN	21	-0.234422	-0.740755	0.840726	1	1	2374	tags=38%, list=22%, signal=49%
AMIT_EGF_RESPONSE_60_MCF10A	24	-0.234819	-0.683701	0.841046	1	1	2136	tags=29%, list=20%, signal=36%
KEGG_HOMOLOGOUS_RECOMBINATION	15	-0.246278	-0.622104	0.84114	1	1	8166	tags=100%, list=75%, signal=406%
MAHADEVAN_RESPONSE_TO_MP470_DN	15	-0.265621	-0.666066	0.84121	1	1	1760	tags=27%, list=16%, signal=32%
STEIN_ESRRA_TARGETS_UP	226	-0.180115	-0.715608	0.841699	1	1	2980	tags=33%, list=28%, signal=44%
GAVIN_FOXP3_TARGETS_CLUSTER_T7	61	-0.188777	-0.705445	0.841699	1	1	2875	tags=36%, list=27%, signal=49%
REACTOME_SIGNALLING_BY_NGF	111	-0.180445	-0.760144	0.842324	1	1	1872	tags=21%, list=17%, signal=25%
LEE_AGING_CEREBELLUM_DN	52	-0.201668	-0.770178	0.842413	1	1	2911	tags=35%, list=27%, signal=47%
WEBER_METHYLATED_HCP_IN_SPERM_DN	19	-0.254926	-0.720894	0.842505	1	1	2541	tags=42%, list=23%, signal=55%
LIM_MAMMARY_LUMINAL_MATURE_DN	56	-0.192467	-0.734432	0.843424	1	1	2619	tags=30%, list=24%, signal=40%
WAMUNYOKOLI_OVARIAN_CANCER_GRADES_1_2_UP	80	-0.184972	-0.722101	0.847082	1	1	3394	tags=39%, list=31%, signal=56%
BILD_CTNNB1_ONCOGENIC_SIGNATURE	47	-0.207293	-0.689095	0.848548	1	1	1679	tags=23%, list=16%, signal=28%
MULLIGHAN_NPM1_SIGNATURE_3_UP	188	-0.167207	-0.802004	0.849057	1	1	2387	tags=22%, list=22%, signal=27%
KEGG_NEUROTROPHIN_SIGNALING_PATHWAY	74	-0.185574	-0.753743	0.849899	1	1	1657	tags=18%, list=15%, signal=21%
VANDESLUIS_COMMD1_TARGETS_GROUP_3_DN	25	-0.220544	-0.68927	0.850099	1	1	2532	tags=32%, list=23%, signal=42%
NABA_CORE_MATRISOME	160	-0.194538	-0.689153	0.850099	1	1	1280	tags=18%, list=12%, signal=20%
TURASHVILI_BREAST_LOBULAR_CARCINOMA_VS_LOBULAR_NORMAL_DN	44	-0.198485	-0.636213	0.850103	1	1	2569	tags=34%, list=24%, signal=45%
IVANOVA_HEMATOPOIESIS_STEM_CELL_AND_PROGENITOR	373	-0.160845	-0.831682	0.850107	1	1	1922	tags=20%, list=18%, signal=23%
KYNG_RESPONSE_TO_H2O2	49	-0.201799	-0.701514	0.850598	1	1	2309	tags=27%, list=21%, signal=34%
MCCLUNG_COCAIN_REWARD_4WK	43	-0.198121	-0.732467	0.850895	1	1	1816	tags=23%, list=17%, signal=28%
TURASHVILI_BREAST_NORMAL_DUCTAL_VS_LOBULAR_UP	37	-0.212556	-0.731835	0.852391	1	1	2811	tags=30%, list=26%, signal=40%
BROWNE_HCMV_INFECTION_6HR_DN	91	-0.189518	-0.736997	0.852459	1	1	2175	tags=25%, list=20%, signal=31%
GROSS_HYPOXIA_VIA_ELK3_ONLY_DN	28	-0.209888	-0.712025	0.85259	1	1	1879	tags=21%, list=17%, signal=26%
ZHAN_MULTIPLE_MYELOMA_CD2_UP	28	-0.215727	-0.704682	0.853909	1	1	3606	tags=46%, list=33%, signal=69%
HEIDENBLAD_AMPLICON_12P11_12_DN	18	-0.227405	-0.691405	0.855711	1	1	46	tags=6%, list=0%, signal=6%
ZHAN_MULTIPLE_MYELOMA_MS_DN	27	-0.213705	-0.710754	0.856275	1	1	3374	tags=37%, list=31%, signal=54%
ZHONG_SECRETOME_OF_LUNG_CANCER_AND_ENDOTHELIUM	42	-0.207541	-0.693781	0.859615	1	1	3257	tags=45%, list=30%, signal=64%
NAKAJIMA_MAST_CELL	27	-0.218887	-0.712685	0.862637	1	1	1020	tags=15%, list=9%, signal=16%
PID_INTEGRIN3_PATHWAY	23	-0.241293	-0.660432	0.863281	1	1	4002	tags=48%, list=37%, signal=76%
VARELA_ZMPSTE24_TARGETS_UP	25	-0.2219	-0.677309	0.864078	1	1	2361	tags=36%, list=22%, signal=46%
VANTVEER_BREAST_CANCER_BRCA1_DN	26	-0.217971	-0.708027	0.864476	1	1	281	tags=8%, list=3%, signal=8%
REACTOME_RNA_POL_II_TRANSCRIPTION	45	-0.195533	-0.649621	0.864476	1	1	2075	tags=24%, list=19%, signal=30%
PHONG_TNF_RESPONSE_VIA_P38_COMPLETE	129	-0.169455	-0.747668	0.864693	1	1	1786	tags=20%, list=16%, signal=24%
HERNANDEZ_ABERRANT_MITOSIS_BY_DOCETACEL_2NM_UP	48	-0.188051	-0.733964	0.864919	1	1	491	tags=8%, list=5%, signal=9%
GRAESSMANN_RESPONSE_TO_MC_AND_SERUM_DEPRIVATION_UP	122	-0.176713	-0.722851	0.865613	1	1	1673	tags=20%, list=15%, signal=23%
STAMBOLSKY_TARGETS_OF_MUTATED_TP53_UP	25	-0.214164	-0.64118	0.866397	1	1	1568	tags=20%, list=14%, signal=23%
REACTOME_PROCESSING_OF_CAPPED_INTRON_CONTAINING_PRE_MRNA	78	-0.189933	-0.649378	0.866935	1	1	1506	tags=15%, list=14%, signal=18%
BENPORATH_SOX2_TARGETS	424	-0.15722	-0.782949	0.868365	1	1	2931	tags=28%, list=27%, signal=36%
REACTOME_SYNTHESIS_OF_PIPS_AT_THE_PLASMA_MEMBRANE	17	-0.23667	-0.702717	0.868421	1	1	1230	tags=12%, list=11%, signal=13%
IVANOVA_HEMATOPOIESIS_STEM_CELL	156	-0.173562	-0.789689	0.87041	1	1	1781	tags=20%, list=16%, signal=23%
HU_ANGIOGENESIS_DN	19	-0.218354	-0.6343	0.870445	1	1	753	tags=11%, list=7%, signal=11%
WANG_RESPONSE_TO_GSK3_INHIBITOR_SB216763_UP	196	-0.172667	-0.680461	0.870707	1	1	1656	tags=20%, list=15%, signal=23%
TOMLINS_METASTASIS_DN	15	-0.237384	-0.679901	0.871032	1	1	2661	tags=33%, list=25%, signal=44%
REACTOME_FORMATION_OF_FIBRIN_CLOT_CLOTTING_CASCADE	21	-0.24309	-0.608406	0.871486	1	1	2418	tags=33%, list=22%, signal=43%
MARKEY_RB1_CHRONIC_LOF_UP	65	-0.185411	-0.719788	0.871636	1	1	1004	tags=14%, list=9%, signal=15%
REACTOME_RESPONSE_TO_ELEVATED_PLATELET_CYTOSOLIC_CA2_	50	-0.211423	-0.692952	0.872093	1	1	2952	tags=34%, list=27%, signal=47%
JOHANSSON_BRAIN_CANCER_EARLY_VS_LATE_DN	26	-0.207703	-0.656722	0.873211	1	1	1760	tags=19%, list=16%, signal=23%
REACTOME_PTM_GAMMA_CARBOXYLATION_HYPUSINE_FORMATION_AND_ARYLSULFATASE_ACTIVATION	20	-0.228597	-0.668113	0.873767	1	1	3033	tags=40%, list=28%, signal=55%
REACTOME_INTERFERON_ALPHA_BETA_SIGNALING	26	-0.225293	-0.545655	0.873767	1	1	2630	tags=31%, list=24%, signal=41%
KEGG_BASE_EXCISION_REPAIR	20	-0.228107	-0.623368	0.875	1	1	1324	tags=15%, list=12%, signal=17%
ZHANG_TLX_TARGETS_UP	58	-0.200994	-0.686951	0.875248	1	1	1760	tags=22%, list=16%, signal=27%
SHEDDEN_LUNG_CANCER_GOOD_SURVIVAL_A5	44	-0.195164	-0.639439	0.876518	1	1	3067	tags=39%, list=28%, signal=54%
POMEROY_MEDULLOBLASTOMA_PROGNOSIS_DN	27	-0.207453	-0.605571	0.876953	1	1	1813	tags=26%, list=17%, signal=31%
SHETH_LIVER_CANCER_VS_TXNIP_LOSS_PAM4	163	-0.171316	-0.800121	0.87747	1	1	2005	tags=24%, list=19%, signal=29%
KUROKAWA_LIVER_CANCER_CHEMOTHERAPY_DN	19	-0.218368	-0.658372	0.87751	1	1	3352	tags=47%, list=31%, signal=68%
LI_WILMS_TUMOR_VS_FETAL_KIDNEY_1_UP	110	-0.176739	-0.715083	0.878296	1	1	2390	tags=24%, list=22%, signal=30%
LUI_THYROID_CANCER_PAX8_PPARG_UP	26	-0.201067	-0.68832	0.878296	1	1	2637	tags=27%, list=24%, signal=36%
IVANOVA_HEMATOPOIESIS_STEM_CELL_SHORT_TERM	15	-0.235747	-0.632021	0.879612	1	1	1489	tags=20%, list=14%, signal=23%
AMIT_EGF_RESPONSE_40_HELA	26	-0.217096	-0.637285	0.879684	1	1	1568	tags=19%, list=14%, signal=22%
WAKABAYASHI_ADIPOGENESIS_PPARG_RXRA_BOUND_WITH_H4K20ME1_MARK	81	-0.179147	-0.744715	0.880081	1	1	1597	tags=19%, list=15%, signal=22%
HILLION_HMGA1B_TARGETS	50	-0.191697	-0.697348	0.881188	1	1	2579	tags=32%, list=24%, signal=42%
BACOLOD_RESISTANCE_TO_ALKYLATING_AGENTS_DN	28	-0.202856	-0.701438	0.881607	1	1	2335	tags=25%, list=22%, signal=32%
LI_WILMS_TUMOR	15	-0.239745	-0.683083	0.882828	1	1	2335	tags=33%, list=22%, signal=42%
GUO_HEX_TARGETS_DN	41	-0.18938	-0.69988	0.882917	1	1	2925	tags=32%, list=27%, signal=43%
DELASERNA_MYOD_TARGETS_DN	28	-0.212105	-0.736481	0.883065	1	1	3125	tags=36%, list=29%, signal=50%
OHM_METHYLATED_IN_ADULT_CANCERS	20	-0.206748	-0.681777	0.883399	1	1	2736	tags=35%, list=25%, signal=47%
MATTIOLI_MULTIPLE_MYELOMA_WITH_14Q32_TRANSLOCATIONS	25	-0.217987	-0.657943	0.88391	1	1	3213	tags=48%, list=30%, signal=68%
KIM_MYC_AMPLIFICATION_TARGETS_DN	50	-0.200018	-0.688064	0.885106	1	1	3607	tags=44%, list=33%, signal=66%
REACTOME_LATENT_INFECTION_OF_HOMO_SAPIENS_WITH_MYCOBACTERIUM_TUBERCULOSIS	22	-0.222466	-0.656347	0.885553	1	1	1247	tags=18%, list=12%, signal=21%
PURBEY_TARGETS_OF_CTBP1_NOT_SATB1_UP	198	-0.166064	-0.813247	0.885714	1	1	2706	tags=29%, list=25%, signal=38%
GENTILE_UV_RESPONSE_CLUSTER_D7	16	-0.224315	-0.640275	0.886	1	1	2937	tags=50%, list=27%, signal=69%
REACTOME_FORMATION_OF_RNA_POL_II_ELONGATION_COMPLEX_	16	-0.222079	-0.641311	0.887097	1	1	2075	tags=31%, list=19%, signal=39%
DURCHDEWALD_SKIN_CARCINOGENESIS_UP	61	-0.197934	-0.733786	0.88755	1	1	2069	tags=28%, list=19%, signal=34%
GROSS_HYPOXIA_VIA_ELK3_UP	111	-0.166998	-0.707538	0.88755	1	1	1879	tags=19%, list=17%, signal=23%
ZHONG_SECRETOME_OF_LUNG_CANCER_AND_MACROPHAGE	49	-0.197747	-0.674775	0.888446	1	1	3469	tags=45%, list=32%, signal=66%
PAL_PRMT5_TARGETS_UP	128	-0.168397	-0.686739	0.888672	1	1	2940	tags=31%, list=27%, signal=42%
ALONSO_METASTASIS_UP	111	-0.172307	-0.696343	0.889121	1	1	3454	tags=37%, list=32%, signal=54%
LI_AMPLIFIED_IN_LUNG_CANCER	108	-0.180299	-0.625634	0.88998	1	1	1740	tags=20%, list=16%, signal=24%
REACTOME_PKB_MEDIATED_EVENTS	20	-0.212645	-0.6487	0.89002	1	1	3570	tags=45%, list=33%, signal=67%
FIGUEROA_AML_METHYLATION_CLUSTER_1_UP	58	-0.183589	-0.727554	0.890042	1	1	3549	tags=45%, list=33%, signal=66%
SUNG_METASTASIS_STROMA_UP	65	-0.185734	-0.693349	0.891348	1	1	1980	tags=26%, list=18%, signal=32%
GAZDA_DIAMOND_BLACKFAN_ANEMIA_ERYTHROID_UP	15	-0.232315	-0.673211	0.89243	1	1	1927	tags=27%, list=18%, signal=32%
BIOCARTA_GCR_PATHWAY	15	-0.225857	-0.682262	0.892562	1	1	1707	tags=20%, list=16%, signal=24%
BENPORATH_PROLIFERATION	80	-0.16824	-0.515918	0.892713	1	1	2124	tags=23%, list=20%, signal=28%
KEGG_N_GLYCAN_BIOSYNTHESIS	30	-0.199622	-0.65796	0.894845	1	1	3702	tags=33%, list=34%, signal=51%
SMIRNOV_RESPONSE_TO_IR_2HR_UP	29	-0.195915	-0.654014	0.895257	1	1	1570	tags=21%, list=14%, signal=24%
REACTOME_CLEAVAGE_OF_GROWING_TRANSCRIPT_IN_THE_TERMINATION_REGION_	25	-0.200709	-0.580123	0.895616	1	1	2762	tags=32%, list=26%, signal=43%
KEGG_GLYCOSPHINGOLIPID_BIOSYNTHESIS_LACTO_AND_NEOLACTO_SERIES	15	-0.230213	-0.672453	0.895669	1	1	1278	tags=20%, list=12%, signal=23%
MOREAUX_MULTIPLE_MYELOMA_BY_TACI_DN	94	-0.170291	-0.603086	0.89834	1	1	2594	tags=26%, list=24%, signal=33%
STEIN_ESRRA_TARGETS_DN	52	-0.178441	-0.71261	0.898488	1	1	3168	tags=35%, list=29%, signal=49%
PICCALUGA_ANGIOIMMUNOBLASTIC_LYMPHOMA_UP	116	-0.180562	-0.630726	0.903093	1	1	1091	tags=15%, list=10%, signal=16%
GARCIA_TARGETS_OF_FLI1_AND_DAX1_UP	33	-0.199196	-0.703792	0.903158	1	1	3641	tags=39%, list=34%, signal=59%
DITTMER_PTHLH_TARGETS_UP	66	-0.169632	-0.680308	0.90342	1	1	3049	tags=35%, list=28%, signal=48%
IKEDA_MIR1_TARGETS_UP	37	-0.198454	-0.60595	0.904762	1	1	2791	tags=35%, list=26%, signal=47%
ZHANG_PROLIFERATING_VS_QUIESCENT	28	-0.197763	-0.64461	0.905039	1	1	2699	tags=32%, list=25%, signal=43%
REACTOME_MYOGENESIS	19	-0.247215	-0.660895	0.906067	1	1	1657	tags=21%, list=15%, signal=25%
EINAV_INTERFERON_SIGNATURE_IN_CANCER	20	-0.206793	-0.5065	0.906883	1	1	2475	tags=25%, list=23%, signal=32%
ST_ADRENERGIC	21	-0.203227	-0.652316	0.911157	1	1	957	tags=10%, list=9%, signal=10%
GARGALOVIC_RESPONSE_TO_OXIDIZED_PHOSPHOLIPIDS_BLACK_UP	22	-0.198042	-0.645063	0.912424	1	1	3019	tags=32%, list=28%, signal=44%
YAO_TEMPORAL_RESPONSE_TO_PROGESTERONE_CLUSTER_6	46	-0.189304	-0.658972	0.912698	1	1	1212	tags=15%, list=11%, signal=17%
MARTORIATI_MDM4_TARGETS_FETAL_LIVER_UP	131	-0.157323	-0.684559	0.912713	1	1	1589	tags=16%, list=15%, signal=19%
AMIT_SERUM_RESPONSE_60_MCF10A	40	-0.196275	-0.63498	0.913481	1	1	923	tags=13%, list=9%, signal=14%
STAMBOLSKY_TARGETS_OF_MUTATED_TP53_DN	34	-0.19192	-0.571995	0.914172	1	1	2652	tags=35%, list=24%, signal=47%
DACOSTA_UV_RESPONSE_VIA_ERCC3_UP	181	-0.15939	-0.592169	0.915354	1	1	3015	tags=30%, list=28%, signal=41%
KEGG_LYSOSOME	76	-0.178722	-0.581802	0.915832	1	1	1811	tags=20%, list=17%, signal=24%
CAFFAREL_RESPONSE_TO_THC_24HR_5_UP	19	-0.197395	-0.593008	0.916667	1	1	3799	tags=53%, list=35%, signal=81%
ROY_WOUND_BLOOD_VESSEL_UP	30	-0.192351	-0.559075	0.916828	1	1	873	tags=13%, list=8%, signal=14%
CROMER_TUMORIGENESIS_UP	31	-0.213502	-0.613264	0.917308	1	1	1630	tags=23%, list=15%, signal=27%
PID_SYNDECAN_2_PATHWAY	21	-0.20705	-0.661053	0.917485	1	1	2837	tags=33%, list=26%, signal=45%
SANSOM_APC_TARGETS_REQUIRE_MYC	125	-0.166377	-0.600284	0.917808	1	1	2510	tags=24%, list=23%, signal=31%
YUAN_ZNF143_PARTNERS	15	-0.219104	-0.604381	0.917895	1	1	3107	tags=47%, list=29%, signal=65%
BYSTRYKH_HEMATOPOIESIS_STEM_CELL_AND_BRAIN_QTL_TRANS	108	-0.165509	-0.727921	0.918447	1	1	2876	tags=31%, list=27%, signal=42%
KIM_WT1_TARGETS_12HR_DN	129	-0.165232	-0.678674	0.918605	1	1	1601	tags=18%, list=15%, signal=21%
YANG_BREAST_CANCER_ESR1_LASER_UP	16	-0.207441	-0.6407	0.91875	1	1	2391	tags=25%, list=22%, signal=32%
PID_ERBB1_INTERNALIZATION_PATHWAY	25	-0.200845	-0.617269	0.919753	1	1	3319	tags=36%, list=31%, signal=52%
RODRIGUES_THYROID_CARCINOMA_DN	47	-0.1832	-0.65256	0.921162	1	1	2579	tags=26%, list=24%, signal=33%
HOSHIDA_LIVER_CANCER_SUBCLASS_S3	152	-0.171612	-0.671194	0.921212	1	1	2465	tags=27%, list=23%, signal=34%
ROVERSI_GLIOMA_COPY_NUMBER_UP	56	-0.182637	-0.613729	0.921415	1	1	1544	tags=20%, list=14%, signal=23%
CHIANG_LIVER_CANCER_SUBCLASS_POLYSOMY7_UP	44	-0.19063	-0.676526	0.921722	1	1	2687	tags=27%, list=25%, signal=36%
WHITFIELD_CELL_CYCLE_G1_S	78	-0.170835	-0.642987	0.922131	1	1	3373	tags=32%, list=31%, signal=46%
MAHAJAN_RESPONSE_TO_IL1A_DN	53	-0.177056	-0.671484	0.923913	1	1	3239	tags=30%, list=30%, signal=43%
MEISSNER_BRAIN_HCP_WITH_H3K27ME3	149	-0.178799	-0.673335	0.924125	1	1	1749	tags=20%, list=16%, signal=24%
RICKMAN_TUMOR_DIFFERENTIATED_MODERATELY_VS_POORLY_UP	68	-0.166347	-0.664303	0.925144	1	1	2483	tags=25%, list=23%, signal=32%
ACEVEDO_NORMAL_TISSUE_ADJACENT_TO_LIVER_TUMOR_DN	202	-0.162554	-0.645792	0.925573	1	1	2931	tags=32%, list=27%, signal=43%
STEIN_ESRRA_TARGETS_RESPONSIVE_TO_ESTROGEN_UP	17	-0.21407	-0.615393	0.926	1	1	3248	tags=35%, list=30%, signal=50%
APPIERTO_RESPONSE_TO_FENRETINIDE_DN	35	-0.185532	-0.648995	0.926415	1	1	3511	tags=43%, list=32%, signal=63%
REACTOME_UNFOLDED_PROTEIN_RESPONSE	46	-0.177796	-0.637088	0.926415	1	1	8912	tags=100%, list=82%, signal=563%
KIM_MYC_AMPLIFICATION_TARGETS_UP	108	-0.167699	-0.670227	0.927734	1	1	2416	tags=26%, list=22%, signal=33%
BANDRES_RESPONSE_TO_CARMUSTIN_MGMT_24HR_DN	19	-0.207487	-0.646025	0.928144	1	1	2330	tags=26%, list=22%, signal=33%
REACTOME_ION_CHANNEL_TRANSPORT	29	-0.197889	-0.646485	0.928425	1	1	1823	tags=17%, list=17%, signal=21%
AFFAR_YY1_TARGETS_UP	123	-0.162315	-0.713796	0.93014	1	1	2307	tags=24%, list=21%, signal=30%
SANSOM_APC_TARGETS_UP	69	-0.163127	-0.690079	0.930967	1	1	686	tags=10%, list=6%, signal=11%
BONOME_OVARIAN_CANCER_POOR_SURVIVAL_UP	23	-0.202302	-0.568834	0.931034	1	1	3896	tags=43%, list=36%, signal=68%
SANSOM_APC_MYC_TARGETS	126	-0.153683	-0.635447	0.931907	1	1	1857	tags=17%, list=17%, signal=21%
MOREIRA_RESPONSE_TO_TSA_UP	16	-0.219097	-0.555501	0.933594	1	1	1173	tags=13%, list=11%, signal=14%
REACTOME_COLLAGEN_FORMATION	34	-0.187315	-0.547263	0.933868	1	1	2313	tags=26%, list=21%, signal=34%
RHEIN_ALL_GLUCOCORTICOID_THERAPY_DN	218	-0.155452	-0.631088	0.934783	1	1	2936	tags=28%, list=27%, signal=38%
JIANG_HYPOXIA_CANCER	45	-0.172827	-0.674418	0.936128	1	1	625	tags=9%, list=6%, signal=9%
PID_ERA_GENOMIC_PATHWAY	38	-0.177922	-0.663142	0.937626	1	1	1584	tags=16%, list=15%, signal=18%
LIU_PROSTATE_CANCER_DN	266	-0.157661	-0.653683	0.937888	1	1	2532	tags=24%, list=23%, signal=31%
MCBRYAN_PUBERTAL_BREAST_5_6WK_DN	78	-0.163227	-0.668359	0.939271	1	1	3008	tags=29%, list=28%, signal=41%
ZHAN_MULTIPLE_MYELOMA_MF_DN	17	-0.196378	-0.558402	0.941053	1	1	1472	tags=18%, list=14%, signal=20%
REACTOME_GLUCONEOGENESIS	20	-0.199311	-0.546346	0.941973	1	1	3515	tags=55%, list=32%, signal=81%
CHIARADONNA_NEOPLASTIC_TRANSFORMATION_KRAS_DN	93	-0.166742	-0.631454	0.943025	1	1	1790	tags=20%, list=17%, signal=24%
REACTOME_METABOLISM_OF_NON_CODING_RNA	24	-0.185676	-0.536439	0.943396	1	1	1779	tags=21%, list=16%, signal=25%
BROWNE_HCMV_INFECTION_14HR_DN	178	-0.15512	-0.756131	0.945674	1	1	2803	tags=30%, list=26%, signal=40%
KOBAYASHI_EGFR_SIGNALING_24HR_UP	56	-0.170358	-0.618849	0.947475	1	1	1299	tags=16%, list=12%, signal=18%
BIOCARTA_MCALPAIN_PATHWAY	15	-0.206232	-0.578743	0.948077	1	1	1176	tags=13%, list=11%, signal=15%
YOSHIOKA_LIVER_CANCER_EARLY_RECURRENCE_UP	24	-0.193371	-0.625274	0.948276	1	1	2762	tags=33%, list=26%, signal=45%
REACTOME_ACTIVATION_OF_CHAPERONE_GENES_BY_XBP1S	26	-0.177467	-0.504492	0.94892	1	1	8912	tags=100%, list=82%, signal=564%
PID_INTEGRIN1_PATHWAY	38	-0.190056	-0.552103	0.949083	1	1	1227	tags=16%, list=11%, signal=18%
PID_PI3K_PLC_TRK_PATHWAY	19	-0.186233	-0.601358	0.950397	1	1	1124	tags=11%, list=10%, signal=12%
REACTOME_DEADENYLATION_DEPENDENT_MRNA_DECAY	25	-0.174031	-0.568815	0.95069	1	1	378	tags=8%, list=3%, signal=8%
SHEN_SMARCA2_TARGETS_UP	256	-0.149943	-0.472945	0.951477	0.999046	1	2837	tags=25%, list=26%, signal=33%
OUELLET_OVARIAN_CANCER_INVASIVE_VS_LMP_UP	63	-0.162571	-0.583246	0.951644	1	1	2458	tags=24%, list=23%, signal=31%
PENG_RAPAMYCIN_RESPONSE_DN	136	-0.151107	-0.53277	0.951923	1	1	2138	tags=20%, list=20%, signal=24%
COLLER_MYC_TARGETS_UP	17	-0.197339	-0.528993	0.953398	1	1	829	tags=12%, list=8%, signal=13%
PID_MYC_ACTIV_PATHWAY	44	-0.169072	-0.590294	0.953815	1	1	2906	tags=36%, list=27%, signal=50%
VIETOR_IFRD1_TARGETS	16	-0.188432	-0.549319	0.954813	1	1	3141	tags=38%, list=29%, signal=53%
ZHAN_V2_LATE_DIFFERENTIATION_GENES	27	-0.17432	-0.614039	0.954825	1	1	1230	tags=15%, list=11%, signal=17%
MEDINA_SMARCA4_TARGETS	29	-0.182034	-0.602226	0.955253	1	1	2907	tags=34%, list=27%, signal=47%
BIOCARTA_INTRINSIC_PATHWAY	15	-0.234823	-0.493759	0.957055	1	1	3234	tags=47%, list=30%, signal=66%
KEGG_GLYCINE_SERINE_AND_THREONINE_METABOLISM	23	-0.187506	-0.588369	0.957143	1	1	8803	tags=100%, list=81%, signal=534%
PILON_KLF1_TARGETS_UP	289	-0.158282	-0.721267	0.957537	1	1	2801	tags=28%, list=26%, signal=37%
CAMPS_COLON_CANCER_COPY_NUMBER_UP	47	-0.185505	-0.633143	0.957611	1	1	2358	tags=28%, list=22%, signal=35%
GOTTWEIN_TARGETS_OF_KSHV_MIR_K12_11	45	-0.170839	-0.664229	0.957661	1	1	1649	tags=16%, list=15%, signal=18%
NIKOLSKY_BREAST_CANCER_5P15_AMPLICON	18	-0.211306	-0.534078	0.957831	1	1	1197	tags=17%, list=11%, signal=19%
DORSAM_HOXA9_TARGETS_UP	23	-0.181121	-0.59988	0.958	1	1	3217	tags=43%, list=30%, signal=62%
REACTOME_GOLGI_ASSOCIATED_VESICLE_BIOGENESIS	30	-0.172429	-0.580546	0.958416	1	1	2108	tags=23%, list=19%, signal=29%
PID_HDAC_CLASSII_PATHWAY	19	-0.184022	-0.587934	0.95842	1	1	2776	tags=32%, list=26%, signal=42%
CAIRO_HEPATOBLASTOMA_CLASSES_UP	339	-0.142004	-0.499503	0.958498	1	1	3146	tags=30%, list=29%, signal=41%
YOSHIMURA_MAPK8_TARGETS_DN	217	-0.150924	-0.730699	0.959267	1	1	2870	tags=29%, list=27%, signal=39%
HOSHIDA_LIVER_CANCER_SURVIVAL_DN	68	-0.167938	-0.685793	0.959381	1	1	2545	tags=26%, list=24%, signal=34%
FORTSCHEGGER_PHF8_TARGETS_UP	147	-0.160709	-0.711058	0.960251	1	1	2024	tags=20%, list=19%, signal=25%
TURASHVILI_BREAST_DUCTAL_CARCINOMA_VS_LOBULAR_NORMAL_UP	43	-0.16706	-0.531201	0.960251	1	1	2573	tags=28%, list=24%, signal=36%
REACTOME_TRANSCRIPTION_COUPLED_NER_TC_NER	22	-0.181524	-0.511322	0.960417	1	1	2458	tags=27%, list=23%, signal=35%
REACTOME_TRANS_GOLGI_NETWORK_VESICLE_BUDDING	35	-0.162199	-0.534574	0.961924	1	1	2108	tags=23%, list=19%, signal=28%
BAE_BRCA1_TARGETS_UP	37	-0.162562	-0.610728	0.962578	1	1	2972	tags=32%, list=27%, signal=45%
WONG_IFNA2_RESISTANCE_DN	17	-0.190209	-0.584312	0.962963	1	1	1959	tags=24%, list=18%, signal=29%
BILD_E2F3_ONCOGENIC_SIGNATURE	126	-0.151408	-0.681114	0.963115	1	1	1694	tags=14%, list=16%, signal=17%
PENG_GLUTAMINE_DEPRIVATION_DN	184	-0.146064	-0.549959	0.96332	1	1	2361	tags=20%, list=22%, signal=25%
BRACHAT_RESPONSE_TO_METHOTREXATE_DN	16	-0.194034	-0.527939	0.964618	1	1	2486	tags=31%, list=23%, signal=41%
ST_MYOCYTE_AD_PATHWAY	15	-0.20357	-0.60016	0.964775	1	1	1268	tags=13%, list=12%, signal=15%
WOO_LIVER_CANCER_RECURRENCE_DN	38	-0.176246	-0.560086	0.965306	1	1	2302	tags=21%, list=21%, signal=27%
MAYBURD_RESPONSE_TO_L663536_DN	33	-0.165819	-0.561125	0.965657	1	1	3231	tags=30%, list=30%, signal=43%
VANHARANTA_UTERINE_FIBROID_WITH_7Q_DELETION_DN	24	-0.162268	-0.539984	0.966245	1	1	2972	tags=29%, list=27%, signal=40%
BENPORATH_MYC_MAX_TARGETS	438	-0.140713	-0.699263	0.966418	1	1	2563	tags=25%, list=24%, signal=31%
BOYAULT_LIVER_CANCER_SUBCLASS_G1_UP	67	-0.153262	-0.598056	0.966527	1	1	3155	tags=34%, list=29%, signal=48%
REACTOME_METABOLISM_OF_CARBOHYDRATES	144	-0.159193	-0.674035	0.967546	1	1	1842	tags=19%, list=17%, signal=22%
PID_MYC_REPRESS_PATHWAY	33	-0.165856	-0.590235	0.968379	1	1	2793	tags=30%, list=26%, signal=41%
REACTOME_TRANSPORT_OF_VITAMINS_NUCLEOSIDES_AND_RELATED_MOLECULES	19	-0.178586	-0.53344	0.970339	1	1	3067	tags=32%, list=28%, signal=44%
IVANOVA_HEMATOPOIESIS_INTERMEDIATE_PROGENITOR	83	-0.152164	-0.621389	0.970817	1	1	1664	tags=14%, list=15%, signal=17%
ONKEN_UVEAL_MELANOMA_UP	438	-0.140079	-0.666593	0.972689	1	1	2873	tags=28%, list=27%, signal=36%
REACTOME_GAB1_SIGNALOSOME	19	-0.174916	-0.520222	0.973306	1	1	2194	tags=21%, list=20%, signal=26%
BORCZUK_MALIGNANT_MESOTHELIOMA_UP	166	-0.142366	-0.535306	0.973469	1	1	2793	tags=27%, list=26%, signal=35%
WONG_PROTEASOME_GENE_MODULE	28	-0.162177	-0.490546	0.97456	1	1	2573	tags=25%, list=24%, signal=33%
DAZARD_RESPONSE_TO_UV_SCC_UP	67	-0.16281	-0.531045	0.97619	1	1	2691	tags=30%, list=25%, signal=39%
VERNOCHET_ADIPOGENESIS	16	-0.19287	-0.538733	0.978	1	1	3213	tags=38%, list=30%, signal=53%
HUMMEL_BURKITTS_LYMPHOMA_UP	27	-0.177756	-0.575396	0.97921	1	1	2580	tags=30%, list=24%, signal=39%
ZHAN_LATE_DIFFERENTIATION_GENES_UP	21	-0.169744	-0.505563	0.979839	1	1	2208	tags=24%, list=20%, signal=30%
CHIANG_LIVER_CANCER_SUBCLASS_UNANNOTATED_UP	49	-0.149986	-0.557444	0.980507	1	1	1746	tags=16%, list=16%, signal=19%
REACTOME_METABOLISM_OF_AMINO_ACIDS_AND_DERIVATIVES	108	-0.151624	-0.640632	0.980583	1	1	2207	tags=19%, list=20%, signal=24%
KEGG_BASAL_TRANSCRIPTION_FACTORS	16	-0.172068	-0.485934	0.981744	0.999649	1	3968	tags=44%, list=37%, signal=69%
BARRIER_CANCER_RELAPSE_NORMAL_SAMPLE_DN	15	-0.19193	-0.499923	0.982107	1	1	2941	tags=40%, list=27%, signal=55%
ACEVEDO_LIVER_CANCER_DN	296	-0.153379	-0.631964	0.982387	1	1	2236	tags=22%, list=21%, signal=27%
KEGG_RENAL_CELL_CARCINOMA	38	-0.164142	-0.57094	0.982387	1	1	3360	tags=37%, list=31%, signal=53%
MALONEY_RESPONSE_TO_17AAG_DN	48	-0.150256	-0.49337	0.982387	1	1	3642	tags=46%, list=34%, signal=69%
NIKOLSKY_BREAST_CANCER_11Q12_Q14_AMPLICON	76	-0.159015	-0.459906	0.982387	0.996907	1	3041	tags=32%, list=28%, signal=44%
REACTOME_TRANSMEMBRANE_TRANSPORT_OF_SMALL_MOLECULES	226	-0.150536	-0.717169	0.984095	1	1	1842	tags=17%, list=17%, signal=20%
CHANDRAN_METASTASIS_UP	119	-0.140351	-0.622113	0.984127	1	1	1664	tags=15%, list=15%, signal=18%
SCHAEFFER_PROSTATE_DEVELOPMENT_6HR_UP	91	-0.151257	-0.583062	0.985417	1	1	2456	tags=26%, list=23%, signal=34%
REACTOME_PHASE_II_CONJUGATION	41	-0.166487	-0.575402	0.986028	1	1	3253	tags=39%, list=30%, signal=56%
KEGG_ENDOMETRIAL_CANCER	32	-0.159682	-0.545353	0.986139	1	1	2194	tags=19%, list=20%, signal=23%
MULLIGHAN_NPM1_MUTATED_SIGNATURE_2_UP	75	-0.137154	-0.55533	0.987261	1	1	2895	tags=24%, list=27%, signal=33%
SCHAEFFER_SOX9_TARGETS_IN_PROSTATE_DEVELOPMENT_DN	25	-0.165409	-0.499225	0.987552	1	1	419	tags=8%, list=4%, signal=8%
GUTIERREZ_MULTIPLE_MYELOMA_UP	18	-0.167521	-0.485648	0.987952	0.998587	1	3682	tags=50%, list=34%, signal=76%
ZHONG_SECRETOME_OF_LUNG_CANCER_AND_FIBROBLAST	84	-0.142902	-0.539216	0.988615	1	1	2466	tags=23%, list=23%, signal=29%
GAZDA_DIAMOND_BLACKFAN_ANEMIA_ERYTHROID_DN	284	-0.136265	-0.711374	0.989626	1	1	2768	tags=26%, list=26%, signal=34%
REACTOME_CHONDROITIN_SULFATE_DERMATAN_SULFATE_METABOLISM	26	-0.156869	-0.472131	0.99187	0.996964	1	1786	tags=15%, list=16%, signal=18%
MCCLUNG_CREB1_TARGETS_DN	33	-0.158305	-0.567634	0.991903	1	1	3018	tags=27%, list=28%, signal=38%
RAMALHO_STEMNESS_UP	113	-0.141666	-0.537333	0.991935	1	1	1995	tags=16%, list=18%, signal=19%
SIG_CHEMOTAXIS	28	-0.151088	-0.490065	0.992079	1	1	2247	tags=21%, list=21%, signal=27%
YAO_TEMPORAL_RESPONSE_TO_PROGESTERONE_CLUSTER_10	38	-0.136758	-0.449945	0.992172	0.997337	1	3454	tags=37%, list=32%, signal=54%
SCHLOSSER_MYC_TARGETS_REPRESSED_BY_SERUM	93	-0.129228	-0.40574	0.993789	0.997642	1	2325	tags=19%, list=21%, signal=24%
LU_AGING_BRAIN_DN	99	-0.137169	-0.580789	0.993927	1	1	2477	tags=22%, list=23%, signal=29%
GENTILE_UV_LOW_DOSE_UP	18	-0.164418	-0.49146	0.994059	1	1	7166	tags=94%, list=66%, signal=279%
DING_LUNG_CANCER_MUTATED_SIGNIFICANTLY	16	-0.149475	-0.42027	0.994059	0.997523	1	3470	tags=38%, list=32%, signal=55%
REACTOME_GLYCOSAMINOGLYCAN_METABOLISM	61	-0.139697	-0.498999	0.994071	1	1	1842	tags=18%, list=17%, signal=22%
RIZKI_TUMOR_INVASIVENESS_2D_UP	28	-0.148889	-0.516073	0.994209	1	1	9221	tags=100%, list=85%, signal=672%
PURBEY_TARGETS_OF_CTBP1_AND_SATB1_DN	103	-0.130419	-0.540016	0.99591	1	1	3345	tags=33%, list=31%, signal=47%
CUI_TCF21_TARGETS_DN	23	-0.153621	-0.472468	0.995984	0.998016	1	2368	tags=22%, list=22%, signal=28%
ZHANG_ANTIVIRAL_RESPONSE_TO_RIBAVIRIN_UP	17	-0.160951	-0.43398	0.99604	0.997158	1	3234	tags=41%, list=30%, signal=59%
MANTOVANI_VIRAL_GPCR_SIGNALING_DN	30	-0.129857	-0.467546	0.996063	0.996693	1	3641	tags=30%, list=34%, signal=45%
BRACHAT_RESPONSE_TO_CAMPTOTHECIN_DN	28	-0.139517	-0.444376	0.996233	0.99701	1	2491	tags=25%, list=23%, signal=32%
DEURIG_T_CELL_PROLYMPHOCYTIC_LEUKEMIA_UP	197	-0.135496	-0.621266	0.997925	1	1	2855	tags=24%, list=26%, signal=32%
PID_CDC42_PATHWAY	44	-0.131293	-0.488492	0.998084	1	1	2297	tags=20%, list=21%, signal=26%
ENK_UV_RESPONSE_KERATINOCYTE_DN	288	-0.127237	-0.52064	1	1	1	3008	tags=29%, list=28%, signal=39%
LASTOWSKA_NEUROBLASTOMA_COPY_NUMBER_DN	420	-0.115002	-0.47854	1	0.999026	1	3351	tags=30%, list=31%, signal=41%
NIKOLSKY_BREAST_CANCER_16Q24_AMPLICON	34	-0.107097	-0.273729	1	0.99992	1	9673	tags=100%, list=89%, signal=935%

## Sheet: High expression of STAT3
Table SII. GSEA Kyoto Encyclopedia of Genes and Genomes results. GSEA outcomes of the c5 (c5.all.v6.1.symbols.gmt) reference gene set for the key genes in the Janus kinase-signal transducer and activator of transcription signaling pathway in skin cutaneous melanoma. GSEA, gene set enrichment analysis. GSEA, gene set enrich analysis; KEGG, Kyoto Encyclopedia of Genes and Genomes; ES, enrichment sc…
Name	Size	ES	NES	NOM P-value	FDR q-value	FWER p-value	Rank at max	Leading edge
BOYLAN_MULTIPLE_MYELOMA_D_CLUSTER_UP	16	0.641774	1.95864	0	1	0.54	1778	tags=50%, list=16%, signal=60%
PID_HNF3A_PATHWAY	26	0.628632	1.82684	0.0094518	1	0.894	2093	tags=54%, list=19%, signal=67%
GALLUZZI_PERMEABILIZE_MITOCHONDRIA	25	0.537262	1.79667	0.0019084	1	0.934	2520	tags=40%, list=23%, signal=52%
PYEON_CANCER_HEAD_AND_NECK_VS_CERVICAL_DN	16	0.698746	1.79497	0.011583	1	0.936	2971	tags=81%, list=27%, signal=112%
BOYAULT_LIVER_CANCER_SUBCLASS_G12_UP	17	0.597712	1.78871	0.00785855	1	0.938	2123	tags=53%, list=20%, signal=66%
CHEN_LIVER_METABOLISM_QTL_CIS	52	0.498905	1.78054	0.018	1	0.944	2850	tags=50%, list=26%, signal=68%
CHARAFE_BREAST_CANCER_BASAL_VS_MESENCHYMAL_UP	65	0.66065	1.73812	0.035503	1	0.976	1213	tags=57%, list=11%, signal=64%
RICKMAN_TUMOR_DIFFERENTIATED_WELL_VS_MODERATELY_DN	65	0.644541	1.72125	0.0423077	1	0.983	1985	tags=65%, list=18%, signal=79%
MUELLER_METHYLATED_IN_GLIOBLASTOMA	18	0.617553	1.715	0.00803213	1	0.984	2359	tags=61%, list=22%, signal=78%
CROMER_METASTASIS_DN	48	0.578171	1.71113	0.0250482	1	0.984	2851	tags=63%, list=26%, signal=84%
BOSCO_EPITHELIAL_DIFFERENTIATION_MODULE	44	0.65916	1.70976	0.0299401	1	0.984	1721	tags=59%, list=16%, signal=70%
REACTOME_PKB_MEDIATED_EVENTS	20	0.56062	1.66942	0.0179641	1	0.994	1900	tags=35%, list=18%, signal=42%
BILD_SRC_ONCOGENIC_SIGNATURE	36	0.462915	1.64755	0.0139165	1	0.996	1701	tags=31%, list=16%, signal=36%
CHARAFE_BREAST_CANCER_LUMINAL_VS_MESENCHYMAL_UP	258	0.438738	1.63319	0.0277778	1	0.997	3296	tags=50%, list=30%, signal=70%
ELVIDGE_HIF1A_AND_HIF2A_TARGETS_DN	55	0.483783	1.62573	0.0348837	1	0.999	1862	tags=40%, list=17%, signal=48%
VANDESLUIS_COMMD1_TARGETS_GROUP_3_UP	55	0.46745	1.62077	0.0122449	1	0.999	841	tags=27%, list=8%, signal=29%
COLDREN_GEFITINIB_RESISTANCE_DN	132	0.481166	1.61046	0.0634615	1	0.999	1490	tags=35%, list=14%, signal=40%
REACTOME_GLUCOSE_METABOLISM	42	0.451249	1.60922	0.0354331	1	0.999	2365	tags=43%, list=22%, signal=55%
WANG_BARRETTS_ESOPHAGUS_AND_ESOPHAGUS_CANCER_DN	23	0.671669	1.60446	0.0557769	1	0.999	2063	tags=70%, list=19%, signal=86%
AIGNER_ZEB1_TARGETS	19	0.654829	1.6	0.059387	1	0.999	1964	tags=63%, list=18%, signal=77%
RICKMAN_HEAD_AND_NECK_CANCER_E	47	0.564198	1.59769	0.0661479	1	0.999	1150	tags=45%, list=11%, signal=50%
FARDIN_HYPOXIA_11	15	0.599132	1.58592	0.0418251	1	1	2597	tags=60%, list=24%, signal=79%
JAEGER_METASTASIS_DN	151	0.597321	1.57503	0.0963391	1	1	1434	tags=48%, list=13%, signal=55%
KIM_GASTRIC_CANCER_CHEMOSENSITIVITY	58	0.448283	1.57366	0.0253906	1	1	2844	tags=45%, list=26%, signal=60%
SMID_BREAST_CANCER_RELAPSE_IN_LUNG_DN	20	0.539133	1.57293	0.028	1	1	1884	tags=50%, list=17%, signal=60%
DAZARD_UV_RESPONSE_CLUSTER_G24	19	0.599898	1.56552	0.0371094	1	1	1541	tags=53%, list=14%, signal=61%
WALLACE_PROSTATE_CANCER_RACE_DN	42	0.413929	1.54077	0.0292276	1	1	2261	tags=40%, list=21%, signal=51%
MANTOVANI_VIRAL_GPCR_SIGNALING_UP	48	0.419635	1.53419	0.0352941	1	1	2095	tags=38%, list=19%, signal=46%
SCHUETZ_BREAST_CANCER_DUCTAL_INVASIVE_DN	55	0.435362	1.53207	0.0682261	1	1	1836	tags=40%, list=17%, signal=48%
VANHARANTA_UTERINE_FIBROID_WITH_7Q_DELETION_UP	41	0.441403	1.52785	0.0403846	1	1	3185	tags=49%, list=29%, signal=69%
REACTOME_GLYCOLYSIS	16	0.566887	1.51663	0.0802348	1	1	2254	tags=56%, list=21%, signal=71%
SEMENZA_HIF1_TARGETS	21	0.53867	1.51597	0.0752294	1	1	2344	tags=48%, list=22%, signal=61%
KEGG_GLYCOSPHINGOLIPID_BIOSYNTHESIS_LACTO_AND_NEOLACTO_SERIES	15	0.510231	1.51241	0.0511811	1	1	1166	tags=33%, list=11%, signal=37%
CROMER_TUMORIGENESIS_DN	38	0.481643	1.50881	0.0695489	1	1	987	tags=39%, list=9%, signal=43%
HOFMANN_CELL_LYMPHOMA_DN	20	0.469242	1.50505	0.0521042	1	1	2428	tags=45%, list=22%, signal=58%
BOYAULT_LIVER_CANCER_SUBCLASS_G1_UP	67	0.392781	1.50444	0.0587045	1	1	2249	tags=37%, list=21%, signal=47%
YANG_BREAST_CANCER_ESR1_BULK_DN	15	0.516073	1.50413	0.0655106	1	1	3820	tags=67%, list=35%, signal=103%
LIEN_BREAST_CARCINOMA_METAPLASTIC_VS_DUCTAL_DN	61	0.453545	1.4952	0.0618956	1	1	1796	tags=36%, list=17%, signal=43%
TURASHVILI_BREAST_DUCTAL_CARCINOMA_VS_LOBULAR_NORMAL_DN	40	0.446768	1.48895	0.0733591	1	1	2300	tags=43%, list=21%, signal=54%
MARCINIAK_ER_STRESS_RESPONSE_VIA_CHOP	17	0.495595	1.48405	0.0597938	1	1	3120	tags=53%, list=29%, signal=74%
LIN_SILENCED_BY_TUMOR_MICROENVIRONMENT	62	0.465746	1.48048	0.0891473	1	1	1060	tags=31%, list=10%, signal=34%
REACTOME_RNA_POL_III_TRANSCRIPTION	15	0.561251	1.47871	0.0778443	1	1	3300	tags=60%, list=30%, signal=86%
ZWANG_EGF_INTERVAL_DN	113	0.365721	1.47313	0.0634615	1	1	3354	tags=44%, list=31%, signal=63%
KANG_GLIS3_TARGETS	20	0.509422	1.4647	0.0636183	1	1	1029	tags=30%, list=10%, signal=33%
RASHI_RESPONSE_TO_IONIZING_RADIATION_1	19	0.51244	1.457	0.0810811	1	1	2172	tags=42%, list=20%, signal=53%
HUPER_BREAST_BASAL_VS_LUMINAL_UP	29	0.607409	1.45513	0.139265	1	1	1783	tags=52%, list=16%, signal=62%
DOANE_BREAST_CANCER_ESR1_DN	29	0.488009	1.45405	0.0892857	1	1	1363	tags=38%, list=13%, signal=43%
MENSSEN_MYC_TARGETS	32	0.509124	1.45332	0.111538	1	1	2060	tags=38%, list=19%, signal=46%
MARIADASON_REGULATED_BY_HISTONE_ACETYLATION_DN	26	0.421567	1.42784	0.0947581	1	1	4257	tags=58%, list=39%, signal=95%
YAMASHITA_METHYLATED_IN_PROSTATE_CANCER	33	0.452009	1.4277	0.0734127	1	1	1183	tags=30%, list=11%, signal=34%
SENGUPTA_NASOPHARYNGEAL_CARCINOMA_WITH_LMP1_DN	109	0.396373	1.42222	0.0877863	1	1	2514	tags=42%, list=23%, signal=54%
SMITH_LIVER_CANCER	25	0.433437	1.41769	0.0788462	1	1	3924	tags=68%, list=36%, signal=106%
LIM_MAMMARY_LUMINAL_MATURE_UP	65	0.386872	1.41332	0.0733198	1	1	2176	tags=34%, list=20%, signal=42%
ZHANG_RESPONSE_TO_CANTHARIDIN_DN	45	0.451581	1.41203	0.151402	1	1	3134	tags=47%, list=29%, signal=65%
RICKMAN_HEAD_AND_NECK_CANCER_C	64	0.508216	1.40605	0.160714	1	1	876	tags=38%, list=8%, signal=41%
FRASOR_TAMOXIFEN_RESPONSE_UP	28	0.410761	1.4057	0.0707071	1	1	1121	tags=25%, list=10%, signal=28%
GU_PDEF_TARGETS_DN	28	0.455048	1.39611	0.132075	1	1	2345	tags=43%, list=22%, signal=55%
MEISSNER_BRAIN_HCP_WITH_H3K4ME2_AND_H3K27ME3	35	0.427082	1.39491	0.0725806	1	1	1595	tags=34%, list=15%, signal=40%
BILD_MYC_ONCOGENIC_SIGNATURE	113	0.365805	1.39451	0.0932836	1	1	3821	tags=58%, list=35%, signal=88%
SMID_BREAST_CANCER_ERBB2_UP	82	0.380876	1.38671	0.0903846	1	1	1688	tags=30%, list=16%, signal=36%
GAZDA_DIAMOND_BLACKFAN_ANEMIA_MYELOID_DN	22	0.432676	1.38456	0.131579	1	1	3709	tags=59%, list=34%, signal=90%
TAVAZOIE_METASTASIS	62	0.378641	1.38182	0.0686071	1	1	3839	tags=58%, list=35%, signal=89%
REACTOME_GLUCONEOGENESIS	20	0.49388	1.37893	0.139489	1	1	2254	tags=40%, list=21%, signal=50%
REACTOME_MITOCHONDRIAL_PROTEIN_IMPORT	36	0.495011	1.37833	0.185958	1	1	3734	tags=64%, list=34%, signal=97%
SMID_BREAST_CANCER_RELAPSE_IN_BRAIN_DN	49	0.358968	1.37623	0.0856031	1	1	3851	tags=53%, list=36%, signal=82%
AUNG_GASTRIC_CANCER	32	0.391556	1.37254	0.0815109	1	1	1938	tags=31%, list=18%, signal=38%
LEE_LIVER_CANCER_ACOX1_UP	39	0.397017	1.36978	0.0978044	1	1	3019	tags=49%, list=28%, signal=67%
SCHLOSSER_MYC_AND_SERUM_RESPONSE_SYNERGY	20	0.588099	1.36186	0.204981	1	1	3134	tags=70%, list=29%, signal=98%
WINTER_HYPOXIA_METAGENE	130	0.338801	1.3605	0.101338	1	1	2344	tags=32%, list=22%, signal=41%
ONDER_CDH1_TARGETS_3_DN	36	0.528253	1.35977	0.173996	1	1	3187	tags=69%, list=29%, signal=98%
REACTOME_PI3K_CASCADE	39	0.38194	1.35972	0.10241	1	1	1900	tags=28%, list=18%, signal=34%
REACTOME_RESPIRATORY_ELECTRON_TRANSPORT	46	0.53473	1.3576	0.237452	1	1	2630	tags=54%, list=24%, signal=71%
BORLAK_LIVER_CANCER_EGF_UP	30	0.439657	1.35731	0.139665	1	1	3686	tags=50%, list=34%, signal=76%
SATO_SILENCED_BY_METHYLATION_IN_PANCREATIC_CANCER_2	28	0.409321	1.35695	0.11811	1	1	1420	tags=32%, list=13%, signal=37%
RODRIGUES_NTN1_TARGETS_DN	86	0.346362	1.35605	0.0823045	1	1	1330	tags=24%, list=12%, signal=28%
ELVIDGE_HIF1A_TARGETS_DN	53	0.404106	1.356	0.131783	1	1	1862	tags=32%, list=17%, signal=39%
BILANGES_RAPAMYCIN_SENSITIVE_GENES	23	0.41263	1.35408	0.121807	1	1	2016	tags=39%, list=19%, signal=48%
ONDER_CDH1_TARGETS_2_DN	269	0.410085	1.35342	0.19186	1	1	1724	tags=35%, list=16%, signal=41%
YAMASHITA_LIVER_CANCER_STEM_CELL_UP	29	0.40426	1.35278	0.113725	1	1	1614	tags=24%, list=15%, signal=28%
DARWICHE_SKIN_TUMOR_PROMOTER_UP	75	0.355736	1.34958	0.122288	1	1	2650	tags=36%, list=24%, signal=47%
KEGG_GLYCOLYSIS_GLUCONEOGENESIS	36	0.407358	1.34931	0.122807	1	1	2384	tags=39%, list=22%, signal=50%
ZUCCHI_METASTASIS_UP	24	0.407259	1.34925	0.121387	1	1	652	tags=21%, list=6%, signal=22%
CHANG_IMMORTALIZED_BY_HPV31_DN	40	0.466764	1.34828	0.157791	1	1	783	tags=28%, list=7%, signal=30%
BERENJENO_TRANSFORMED_BY_RHOA_FOREVER_DN	19	0.461005	1.34667	0.164659	1	1	1701	tags=37%, list=16%, signal=44%
MEISSNER_ES_ICP_WITH_H3K4ME3	19	0.441137	1.34635	0.123016	1	1	2368	tags=47%, list=22%, signal=61%
LEONARD_HYPOXIA	25	0.467324	1.34145	0.191257	1	1	1654	tags=36%, list=15%, signal=42%
LI_DCP2_BOUND_MRNA	53	0.473716	1.33989	0.22	1	1	3078	tags=58%, list=28%, signal=81%
DARWICHE_SQUAMOUS_CELL_CARCINOMA_UP	75	0.350592	1.33921	0.12426	1	1	2650	tags=39%, list=24%, signal=51%
CHARAFE_BREAST_CANCER_LUMINAL_VS_BASAL_UP	213	0.308153	1.33885	0.0898204	1	1	3137	tags=38%, list=29%, signal=52%
KEGG_ARGININE_AND_PROLINE_METABOLISM	29	0.401923	1.33653	0.116858	1	1	1688	tags=31%, list=16%, signal=37%
REACTOME_SPHINGOLIPID_DE_NOVO_BIOSYNTHESIS	18	0.478265	1.33411	0.166337	1	1	2173	tags=39%, list=20%, signal=49%
GENTILE_UV_RESPONSE_CLUSTER_D9	20	0.440828	1.33192	0.160164	1	1	2777	tags=35%, list=26%, signal=47%
KIM_BIPOLAR_DISORDER_OLIGODENDROCYTE_DENSITY_CORR_DN	41	0.395274	1.33131	0.107143	1	1	1183	tags=27%, list=11%, signal=30%
MEISSNER_BRAIN_ICP_WITH_H3K4ME3	19	0.428045	1.33115	0.122772	1	1	3555	tags=58%, list=33%, signal=86%
ACEVEDO_LIVER_TUMOR_VS_NORMAL_ADJACENT_TISSUE_DN	154	0.313668	1.32864	0.0853175	1	1	2870	tags=39%, list=27%, signal=52%
NIKOLSKY_BREAST_CANCER_8Q23_Q24_AMPLICON	78	0.440881	1.3286	0.196581	1	1	2800	tags=50%, list=26%, signal=67%
MOOTHA_VOXPHOS	54	0.511547	1.32845	0.260536	1	1	3737	tags=65%, list=35%, signal=98%
YAO_TEMPORAL_RESPONSE_TO_PROGESTERONE_CLUSTER_1	48	0.372423	1.32758	0.150391	1	1	3598	tags=46%, list=33%, signal=68%
SCHAEFFER_PROSTATE_DEVELOPMENT_48HR_UP	263	0.311608	1.32491	0.119691	1	1	2098	tags=28%, list=19%, signal=34%
LIU_SOX4_TARGETS_DN	178	0.292713	1.32323	0.104046	1	1	2838	tags=35%, list=26%, signal=46%
KEGG_MTOR_SIGNALING_PATHWAY	29	0.383271	1.32126	0.142574	1	1	1304	tags=21%, list=12%, signal=23%
SCHRAETS_MLL_TARGETS_DN	16	0.480247	1.31973	0.145873	1	1	1412	tags=31%, list=13%, signal=36%
MIKKELSEN_MEF_LCP_WITH_H3K27ME3	35	0.394685	1.318	0.108696	1	1	2055	tags=37%, list=19%, signal=46%
REACTOME_RNA_POL_I_RNA_POL_III_AND_MITOCHONDRIAL_TRANSCRIPTION	61	0.391755	1.31758	0.177481	1	1	3498	tags=51%, list=32%, signal=75%
PECE_MAMMARY_STEM_CELL_UP	81	0.418897	1.31432	0.223553	1	1	2908	tags=49%, list=27%, signal=67%
SU_LIVER	33	0.486594	1.31364	0.181275	1	1	2585	tags=52%, list=24%, signal=67%
PID_P38_ALPHA_BETA_DOWNSTREAM_PATHWAY	29	0.360479	1.31339	0.123077	1	1	3237	tags=38%, list=30%, signal=54%
TORCHIA_TARGETS_OF_EWSR1_FLI1_FUSION_UP	134	0.281678	1.31205	0.0770791	1	1	1739	tags=22%, list=16%, signal=26%
REACTOME_ACYL_CHAIN_REMODELLING_OF_PC	15	0.454749	1.3113	0.136273	1	1	1522	tags=27%, list=14%, signal=31%
PID_ANGIOPOIETIN_RECEPTOR_PATHWAY	27	0.403418	1.31055	0.130705	1	1	2464	tags=37%, list=23%, signal=48%
REACTOME_TRANSCRIPTION	103	0.352648	1.30841	0.169145	1	1	3498	tags=50%, list=32%, signal=72%
FOSTER_KDM1A_TARGETS_DN	115	0.313424	1.30812	0.124506	1	1	3219	tags=35%, list=30%, signal=49%
KEGG_PORPHYRIN_AND_CHLOROPHYLL_METABOLISM	15	0.451533	1.30578	0.121807	1	1	3346	tags=60%, list=31%, signal=87%
REACTOME_ACYL_CHAIN_REMODELLING_OF_PE	15	0.457277	1.30473	0.151697	1	1	1522	tags=27%, list=14%, signal=31%
LABBE_TARGETS_OF_TGFB1_AND_WNT3A_DN	59	0.341422	1.30088	0.101533	1	1	2650	tags=39%, list=24%, signal=51%
PID_HIF1_TFPATHWAY	35	0.392428	1.30037	0.135338	1	1	2464	tags=34%, list=23%, signal=44%
MIKKELSEN_MCV6_ICP_WITH_H3K27ME3	39	0.381636	1.29892	0.126706	1	1	1187	tags=26%, list=11%, signal=29%
MARTENS_TRETINOIN_RESPONSE_DN	441	0.3157	1.29845	0.193359	1	1	3588	tags=44%, list=33%, signal=63%
LI_AMPLIFIED_IN_LUNG_CANCER	108	0.370106	1.29655	0.180952	1	1	2649	tags=44%, list=24%, signal=58%
KEGG_STARCH_AND_SUCROSE_METABOLISM	27	0.419875	1.29629	0.126789	1	1	3346	tags=59%, list=31%, signal=86%
MEISSNER_NPC_HCP_WITH_H3_UNMETHYLATED	275	0.306835	1.29609	0.123529	1	1	2406	tags=32%, list=22%, signal=40%
BYSTRYKH_HEMATOPOIESIS_STEM_CELL_SCP2_QTL_TRANS	15	0.430483	1.29321	0.130977	1	1	2824	tags=60%, list=26%, signal=81%
LEE_LIVER_CANCER_MYC_TGFA_UP	36	0.401179	1.29137	0.177043	1	1	2406	tags=42%, list=22%, signal=53%
MIKKELSEN_MEF_ICP_WITH_H3K27ME3	104	0.33766	1.29071	0.100616	1	1	2116	tags=32%, list=20%, signal=39%
BRUINS_UVC_RESPONSE_MIDDLE	54	0.336399	1.29061	0.137331	1	1	2397	tags=31%, list=22%, signal=40%
HINATA_NFKB_TARGETS_KERATINOCYTE_DN	19	0.477125	1.29022	0.196881	1	1	1060	tags=42%, list=10%, signal=47%
KOHOUTEK_CCNT1_TARGETS	28	0.432146	1.28992	0.196755	1	1	1320	tags=32%, list=12%, signal=37%
SHEDDEN_LUNG_CANCER_GOOD_SURVIVAL_A4	119	0.292696	1.28959	0.100196	1	1	2520	tags=28%, list=23%, signal=36%
BIOCARTA_KERATINOCYTE_PATHWAY	28	0.401587	1.28122	0.175908	1	1	1862	tags=32%, list=17%, signal=39%
STEIN_ESRRA_TARGETS	296	0.297801	1.2812	0.167619	1	1	2746	tags=35%, list=25%, signal=46%
ELVIDGE_HYPOXIA_UP	97	0.343286	1.27897	0.164751	1	1	1934	tags=30%, list=18%, signal=36%
STEIN_ESRRA_TARGETS_UP	226	0.319519	1.27363	0.203095	1	1	2746	tags=37%, list=25%, signal=48%
YAO_TEMPORAL_RESPONSE_TO_PROGESTERONE_CLUSTER_2	41	0.344928	1.27044	0.152091	1	1	3933	tags=44%, list=36%, signal=69%
WINTER_HYPOXIA_UP	47	0.403326	1.26978	0.22736	1	1	3019	tags=43%, list=28%, signal=59%
KEGG_ALZHEIMERS_DISEASE	102	0.357283	1.26927	0.216	1	1	3499	tags=47%, list=32%, signal=69%
ABRAMSON_INTERACT_WITH_AIRE	21	0.464767	1.26746	0.242884	1	1	3475	tags=57%, list=32%, signal=84%
DAZARD_RESPONSE_TO_UV_SCC_DN	67	0.326309	1.26735	0.167323	1	1	3825	tags=52%, list=35%, signal=80%
WAKABAYASHI_ADIPOGENESIS_PPARG_BOUND_36HR	18	0.40423	1.26719	0.192623	1	1	3872	tags=39%, list=36%, signal=60%
DELACROIX_RARG_BOUND_MEF	235	0.282452	1.2631	0.124031	1	1	2275	tags=27%, list=21%, signal=33%
BONCI_TARGETS_OF_MIR15A_AND_MIR16_1	45	0.358357	1.26268	0.194561	1	1	3335	tags=47%, list=31%, signal=67%
BOYLAN_MULTIPLE_MYELOMA_D_UP	53	0.313279	1.26162	0.147348	1	1	2420	tags=36%, list=22%, signal=46%
MIKKELSEN_ES_ICP_WITH_H3K27ME3	21	0.400958	1.2614	0.135827	1	1	716	tags=24%, list=7%, signal=25%
KONDO_PROSTATE_CANCER_WITH_H3K27ME3	89	0.3389	1.26098	0.149901	1	1	2403	tags=34%, list=22%, signal=43%
SENGUPTA_NASOPHARYNGEAL_CARCINOMA_DN	186	0.346106	1.26093	0.180077	1	1	1575	tags=27%, list=15%, signal=31%
TERAO_AOX4_TARGETS_SKIN_UP	20	0.40493	1.25961	0.213611	1	1	2496	tags=45%, list=23%, signal=58%
WU_CELL_MIGRATION	104	0.371836	1.25813	0.247104	1	1	1403	tags=29%, list=13%, signal=33%
KEGG_SPLICEOSOME	70	0.377201	1.2575	0.223709	1	1	3685	tags=50%, list=34%, signal=75%
MIKKELSEN_ES_LCP_WITH_H3K4ME3	69	0.357989	1.25642	0.190763	1	1	1814	tags=29%, list=17%, signal=35%
SMID_BREAST_CANCER_RELAPSE_IN_BONE_DN	183	0.299377	1.25512	0.151052	1	1	1852	tags=25%, list=17%, signal=30%
MCBRYAN_PUBERTAL_BREAST_4_5WK_UP	164	0.327614	1.25341	0.190654	1	1	2075	tags=33%, list=19%, signal=40%
DARWICHE_PAPILLOMA_RISK_HIGH_UP	81	0.321882	1.2533	0.20404	1	1	2650	tags=36%, list=24%, signal=47%
SHIPP_DLBCL_CURED_VS_FATAL_UP	21	0.4012	1.25275	0.178641	1	1	1627	tags=33%, list=15%, signal=39%
SHEDDEN_LUNG_CANCER_GOOD_SURVIVAL_A5	44	0.384054	1.24825	0.247967	1	1	1842	tags=32%, list=17%, signal=38%
JAZAG_TGFB1_SIGNALING_VIA_SMAD4_UP	60	0.334227	1.2473	0.165339	1	1	1265	tags=23%, list=12%, signal=26%
REACTOME_SULFUR_AMINO_ACID_METABOLISM	17	0.408139	1.24656	0.211132	1	1	2866	tags=41%, list=26%, signal=56%
MOREAUX_MULTIPLE_MYELOMA_BY_TACI_UP	233	0.290166	1.24429	0.15873	1	1	1630	tags=22%, list=15%, signal=26%
OSADA_ASCL1_TARGETS_UP	25	0.414278	1.24314	0.186275	1	1	1280	tags=28%, list=12%, signal=32%
ZUCCHI_METASTASIS_DN	26	0.436359	1.24272	0.24031	1	1	2952	tags=42%, list=27%, signal=58%
CREIGHTON_AKT1_SIGNALING_VIA_MTOR_UP	19	0.492036	1.24095	0.275304	1	1	3610	tags=63%, list=33%, signal=95%
SMID_BREAST_CANCER_RELAPSE_IN_BRAIN_UP	24	0.397079	1.24052	0.186275	1	1	1363	tags=29%, list=13%, signal=33%
WONG_ENDMETRIUM_CANCER_UP	15	0.4935	1.23845	0.229126	1	1	1248	tags=47%, list=12%, signal=53%
LEIN_ASTROCYTE_MARKERS	23	0.398471	1.23723	0.197581	1	1	1253	tags=30%, list=12%, signal=34%
REACTOME_RESPIRATORY_ELECTRON_TRANSPORT_ATP_SYNTHESIS_BY_CHEMIOSMOTIC_COUPLING_AND_HEAT_PRODUCTION_BY_UNCOUPLING_PROTEINS_	56	0.473499	1.23527	0.319231	1	1	2908	tags=52%, list=27%, signal=70%
KEGG_ADIPOCYTOKINE_SIGNALING_PATHWAY	39	0.354063	1.23416	0.181087	1	1	1900	tags=31%, list=18%, signal=37%
FALVELLA_SMOKERS_WITH_LUNG_CANCER	42	0.345473	1.23247	0.194757	1	1	1752	tags=29%, list=16%, signal=34%
MURAKAMI_UV_RESPONSE_24HR	15	0.456672	1.22969	0.223553	1	1	545	tags=20%, list=5%, signal=21%
FIGUEROA_AML_METHYLATION_CLUSTER_1_DN	22	0.384295	1.22736	0.210744	1	1	1504	tags=23%, list=14%, signal=26%
QI_HYPOXIA	74	0.310866	1.22728	0.183044	1	1	1981	tags=27%, list=18%, signal=33%
MATZUK_MALE_REPRODUCTION_SERTOLI	18	0.409524	1.22718	0.201172	1	1	1622	tags=28%, list=15%, signal=33%
PURBEY_TARGETS_OF_CTBP1_AND_SATB1_UP	52	0.33735	1.2253	0.214015	1	1	2564	tags=33%, list=24%, signal=43%
JISON_SICKLE_CELL_DISEASE_DN	94	0.339214	1.22529	0.243137	1	1	3032	tags=38%, list=28%, signal=53%
MEISSNER_BRAIN_HCP_WITH_H3K27ME3	149	0.323558	1.22343	0.184466	1	1	1880	tags=30%, list=17%, signal=35%
RASHI_RESPONSE_TO_IONIZING_RADIATION_3	27	0.407595	1.22206	0.237817	1	1	3872	tags=59%, list=36%, signal=92%
KIM_ALL_DISORDERS_CALB1_CORR_DN	18	0.423728	1.21788	0.236328	1	1	1858	tags=39%, list=17%, signal=47%
SCHLINGEMANN_SKIN_CARCINOGENESIS_TPA_UP	18	0.496035	1.21769	0.25	1	1	1729	tags=44%, list=16%, signal=53%
KAYO_CALORIE_RESTRICTION_MUSCLE_DN	53	0.311062	1.21673	0.194707	1	1	2617	tags=34%, list=24%, signal=45%
RICKMAN_TUMOR_DIFFERENTIATED_WELL_VS_POORLY_DN	218	0.371684	1.2159	0.300935	1	1	1966	tags=35%, list=18%, signal=42%
KEGG_LINOLEIC_ACID_METABOLISM	19	0.484136	1.21564	0.259875	1	1	1523	tags=37%, list=14%, signal=43%
LIN_NPAS4_TARGETS_UP	79	0.284356	1.21525	0.160985	1	1	2740	tags=34%, list=25%, signal=45%
JAIN_NFKB_SIGNALING	37	0.350361	1.21437	0.220755	1	1	2591	tags=38%, list=24%, signal=50%
ZHENG_GLIOBLASTOMA_PLASTICITY_DN	34	0.34981	1.21156	0.212724	1	1	993	tags=21%, list=9%, signal=23%
WALLACE_PROSTATE_CANCER_UP	16	0.429142	1.21085	0.263672	1	1	1004	tags=25%, list=9%, signal=28%
PID_P53_REGULATION_PATHWAY	38	0.338439	1.20904	0.233663	1	1	2765	tags=29%, list=26%, signal=39%
SAGIV_CD24_TARGETS_UP	15	0.426288	1.20769	0.22449	1	1	1923	tags=47%, list=18%, signal=57%
PID_ARF6_PATHWAY	22	0.373709	1.20682	0.237903	1	1	3999	tags=59%, list=37%, signal=94%
HAMAI_APOPTOSIS_VIA_TRAIL_DN	107	0.319414	1.20627	0.247505	1	1	3449	tags=47%, list=32%, signal=68%
NIKOLSKY_BREAST_CANCER_20Q12_Q13_AMPLICON	75	0.364203	1.20623	0.249035	1	1	3211	tags=49%, list=30%, signal=70%
REACTOME_TCA_CYCLE_AND_RESPIRATORY_ELECTRON_TRANSPORT	76	0.418646	1.20186	0.335922	1	1	3087	tags=50%, list=29%, signal=69%
YAO_TEMPORAL_RESPONSE_TO_PROGESTERONE_CLUSTER_5	15	0.46174	1.20161	0.223485	1	1	2359	tags=47%, list=22%, signal=60%
KUMAR_PATHOGEN_LOAD_BY_MACROPHAGES	148	0.244735	1.20119	0.10084	1	1	2857	tags=32%, list=26%, signal=43%
BHAT_ESR1_TARGETS_NOT_VIA_AKT1_UP	123	0.314422	1.20093	0.223062	1	1	1506	tags=26%, list=14%, signal=30%
KEGG_CARDIAC_MUSCLE_CONTRACTION	44	0.3577	1.20025	0.232	1	1	2889	tags=45%, list=27%, signal=62%
NAKAMURA_METASTASIS_MODEL_DN	31	0.372	1.19995	0.237452	1	1	610	tags=23%, list=6%, signal=24%
KEGG_OXIDATIVE_PHOSPHORYLATION	76	0.409004	1.19955	0.306084	1	1	2908	tags=45%, list=27%, signal=61%
BROWNE_HCMV_INFECTION_24HR_UP	87	0.278543	1.19924	0.194175	1	1	3641	tags=48%, list=34%, signal=72%
WAMUNYOKOLI_OVARIAN_CANCER_LMP_UP	154	0.318388	1.1989	0.263566	1	1	1190	tags=20%, list=11%, signal=22%
BURTON_ADIPOGENESIS_4	25	0.390558	1.19734	0.255814	1	1	3403	tags=48%, list=31%, signal=70%
COLLER_MYC_TARGETS_UP	17	0.444587	1.19645	0.288641	1	1	1874	tags=47%, list=17%, signal=57%
LIM_MAMMARY_STEM_CELL_DN	253	0.283264	1.19636	0.243295	1	1	1332	tags=19%, list=12%, signal=22%
IWANAGA_CARCINOGENESIS_BY_KRAS_DN	69	0.281638	1.19632	0.172199	1	1	3363	tags=42%, list=31%, signal=61%
NIKOLSKY_BREAST_CANCER_1Q21_AMPLICON	24	0.481952	1.19619	0.337325	1	1	1984	tags=42%, list=18%, signal=51%
GERY_CEBP_TARGETS	81	0.335064	1.1922	0.240079	1	1	3802	tags=52%, list=35%, signal=79%
ZHANG_GATA6_TARGETS_DN	33	0.354509	1.19212	0.235741	1	1	1369	tags=21%, list=13%, signal=24%
OHGUCHI_LIVER_HNF4A_TARGETS_UP	27	0.371081	1.19001	0.203557	1	1	2524	tags=41%, list=23%, signal=53%
KUNINGER_IGF1_VS_PDGFB_TARGETS_DN	26	0.340708	1.18954	0.231801	1	1	1313	tags=23%, list=12%, signal=26%
PID_LYSOPHOSPHOLIPID_PATHWAY	39	0.335963	1.18871	0.23855	1	1	3173	tags=44%, list=29%, signal=61%
TURASHVILI_BREAST_DUCTAL_CARCINOMA_VS_DUCTAL_NORMAL_DN	109	0.314839	1.18812	0.213178	1	1	2045	tags=32%, list=19%, signal=39%
REACTOME_PI_3K_CASCADE	25	0.366257	1.1866	0.268	1	1	4097	tags=52%, list=38%, signal=83%
MCBRYAN_PUBERTAL_BREAST_3_4WK_UP	132	0.301151	1.1863	0.217803	1	1	2395	tags=35%, list=22%, signal=44%
LIU_BREAST_CANCER	17	0.383098	1.18577	0.238095	1	1	1179	tags=35%, list=11%, signal=40%
ABE_VEGFA_TARGETS_2HR	19	0.40568	1.18494	0.261111	1	1	2263	tags=37%, list=21%, signal=46%
ONDER_CDH1_TARGETS_1_DN	110	0.33012	1.18461	0.259813	1	1	3362	tags=41%, list=31%, signal=59%
QI_HYPOXIA_TARGETS_OF_HIF1A_AND_FOXA2	22	0.410718	1.18437	0.270633	1	1	2316	tags=41%, list=21%, signal=52%
NIKOLSKY_BREAST_CANCER_5P15_AMPLICON	18	0.465393	1.18413	0.302	1	1	3297	tags=44%, list=30%, signal=64%
CHIANG_LIVER_CANCER_SUBCLASS_INTERFERON_DN	23	0.357418	1.1819	0.242424	1	1	768	tags=22%, list=7%, signal=23%
XU_GH1_EXOGENOUS_TARGETS_DN	80	0.280787	1.18164	0.195918	1	1	3782	tags=51%, list=35%, signal=78%
WANG_LSD1_TARGETS_DN	22	0.381561	1.18058	0.24053	1	1	2216	tags=41%, list=20%, signal=51%
MIKKELSEN_MCV6_LCP_WITH_H3K4ME3	91	0.33105	1.17765	0.256972	1	1	1161	tags=22%, list=11%, signal=24%
GROSS_HYPOXIA_VIA_HIF1A_UP	39	0.341444	1.17671	0.257692	1	1	2814	tags=33%, list=26%, signal=45%
MIKKELSEN_MEF_HCP_WITH_H3_UNMETHYLATED	122	0.286227	1.17654	0.22549	1	1	2465	tags=31%, list=23%, signal=40%
ACEVEDO_LIVER_CANCER_DN	296	0.279964	1.17563	0.233141	1	1	2189	tags=29%, list=20%, signal=35%
KEGG_RIBOSOME	55	0.527628	1.1756	0.363265	1	1	3124	tags=58%, list=29%, signal=81%
KEGG_DRUG_METABOLISM_CYTOCHROME_P450	30	0.442269	1.17473	0.282828	1	1	3846	tags=70%, list=36%, signal=108%
JACKSON_DNMT1_TARGETS_DN	15	0.45103	1.17415	0.286275	1	1	2888	tags=47%, list=27%, signal=64%
CADWELL_ATG16L1_TARGETS_DN	44	0.316104	1.17355	0.233792	1	1	2651	tags=36%, list=24%, signal=48%
FLECHNER_BIOPSY_KIDNEY_TRANSPLANT_OK_VS_DONOR_DN	15	0.438114	1.17197	0.28131	1	1	2617	tags=33%, list=24%, signal=44%
MORI_EMU_MYC_LYMPHOMA_BY_ONSET_TIME_UP	61	0.330337	1.17077	0.263672	1	1	2019	tags=26%, list=19%, signal=32%
KIM_RESPONSE_TO_TSA_AND_DECITABINE_UP	72	0.31792	1.1682	0.251497	1	1	1796	tags=29%, list=17%, signal=35%
NUTT_GBM_VS_AO_GLIOMA_UP	25	0.367693	1.16764	0.261569	1	1	1419	tags=32%, list=13%, signal=37%
BROWNE_HCMV_INFECTION_1HR_DN	117	0.258048	1.16248	0.191406	1	1	2464	tags=30%, list=23%, signal=38%
DOANE_BREAST_CANCER_CLASSES_UP	47	0.331679	1.16181	0.262548	1	1	1700	tags=28%, list=16%, signal=33%
KEGG_HUNTINGTONS_DISEASE	92	0.3285	1.1614	0.315992	1	1	2630	tags=40%, list=24%, signal=53%
DARWICHE_PAPILLOMA_RISK_LOW_UP	89	0.290547	1.15709	0.272908	1	1	2650	tags=35%, list=24%, signal=46%
CAIRO_LIVER_DEVELOPMENT_DN	126	0.302267	1.15661	0.282398	1	1	2568	tags=39%, list=24%, signal=50%
RIZ_ERYTHROID_DIFFERENTIATION_CCNE1	17	0.384212	1.1555	0.284872	1	1	4073	tags=53%, list=38%, signal=85%
BAKKER_FOXO3_TARGETS_DN	99	0.287912	1.15395	0.272189	1	1	2814	tags=34%, list=26%, signal=46%
ROVERSI_GLIOMA_LOH_REGIONS	28	0.357271	1.15234	0.251968	1	1	3802	tags=57%, list=35%, signal=88%
REACTOME_TIGHT_JUNCTION_INTERACTIONS	15	0.440773	1.15162	0.306483	1	1	2443	tags=53%, list=23%, signal=69%
REACTOME_PEPTIDE_CHAIN_ELONGATION	52	0.534097	1.15126	0.386503	1	1	3681	tags=67%, list=34%, signal=101%
FLOTHO_PEDIATRIC_ALL_THERAPY_RESPONSE_UP	34	0.389248	1.15035	0.302041	1	1	2018	tags=32%, list=19%, signal=40%
MENSE_HYPOXIA_UP	54	0.325973	1.14887	0.258303	1	1	2336	tags=28%, list=22%, signal=35%
HOFMANN_MYELODYSPLASTIC_SYNDROM_LOW_RISK_DN	20	0.409753	1.14781	0.313646	1	1	3610	tags=55%, list=33%, signal=82%
CAFFAREL_RESPONSE_TO_THC_DN	16	0.406098	1.14731	0.278626	1	1	2328	tags=38%, list=21%, signal=48%
REACTOME_FORMATION_OF_THE_TERNARY_COMPLEX_AND_SUBSEQUENTLY_THE_43S_COMPLEX	30	0.503442	1.14509	0.390342	1	1	3113	tags=53%, list=29%, signal=75%
PID_IL2_PI3K_PATHWAY	17	0.383219	1.1432	0.277445	1	1	1883	tags=24%, list=17%, signal=28%
KYNG_DNA_DAMAGE_UP	141	0.241916	1.14298	0.221328	1	1	3320	tags=36%, list=31%, signal=51%
RASHI_RESPONSE_TO_IONIZING_RADIATION_5	88	0.251736	1.14237	0.224532	1	1	3865	tags=41%, list=36%, signal=63%
DOANE_BREAST_CANCER_ESR1_UP	71	0.297034	1.14063	0.292089	1	1	1812	tags=27%, list=17%, signal=32%
REACTOME_INSULIN_RECEPTOR_SIGNALLING_CASCADE	49	0.301863	1.14059	0.263158	1	1	2086	tags=27%, list=19%, signal=33%
DOANE_RESPONSE_TO_ANDROGEN_UP	107	0.279288	1.14053	0.255859	1	1	3697	tags=44%, list=34%, signal=66%
ELVIDGE_HYPOXIA_BY_DMOG_UP	71	0.322797	1.14013	0.285444	1	1	1934	tags=30%, list=18%, signal=36%
BHAT_ESR1_TARGETS_VIA_AKT1_UP	170	0.306576	1.13979	0.298419	1	1	1989	tags=28%, list=18%, signal=34%
LIN_APC_TARGETS	40	0.399884	1.13911	0.338583	1	1	3707	tags=60%, list=34%, signal=91%
CHIANG_LIVER_CANCER_SUBCLASS_POLYSOMY7_UP	44	0.321932	1.13867	0.288032	1	1	2189	tags=32%, list=20%, signal=40%
REACTOME_INFLUENZA_LIFE_CYCLE	75	0.422475	1.1353	0.403579	1	1	2971	tags=51%, list=27%, signal=69%
COWLING_MYCN_TARGETS	23	0.364516	1.13389	0.321569	1	1	1557	tags=30%, list=14%, signal=35%
AMIT_SERUM_RESPONSE_240_MCF10A	29	0.366105	1.13189	0.31286	1	1	1213	tags=28%, list=11%, signal=31%
SANSOM_APC_MYC_TARGETS	126	0.277769	1.13134	0.297087	1	1	3233	tags=37%, list=30%, signal=53%
KEGG_BASE_EXCISION_REPAIR	20	0.417036	1.13046	0.350195	1	1	2890	tags=40%, list=27%, signal=54%
YUAN_ZNF143_PARTNERS	15	0.41329	1.13002	0.316348	1	1	1274	tags=27%, list=12%, signal=30%
IRITANI_MAD1_TARGETS_DN	28	0.408004	1.12761	0.353293	1	1	3120	tags=50%, list=29%, signal=70%
WANG_CLIM2_TARGETS_UP	142	0.239601	1.12734	0.252049	1	1	3395	tags=40%, list=31%, signal=58%
DUTERTRE_ESTRADIOL_RESPONSE_6HR_UP	138	0.273469	1.12734	0.277132	1	1	1989	tags=25%, list=18%, signal=31%
NAKAYAMA_SOFT_TISSUE_TUMORS_PCA2_DN	49	0.346809	1.12613	0.305835	1	1	1979	tags=37%, list=18%, signal=45%
LEI_MYB_TARGETS	188	0.292884	1.12528	0.322835	1	1	1557	tags=23%, list=14%, signal=26%
JAZAG_TGFB1_SIGNALING_VIA_SMAD4_DN	39	0.308021	1.12436	0.298781	1	1	3886	tags=54%, list=36%, signal=84%
REACTOME_RNA_POL_I_TRANSCRIPTION	47	0.36346	1.12394	0.351889	1	1	3403	tags=49%, list=31%, signal=71%
BROWNE_HCMV_INFECTION_30MIN_UP	33	0.353576	1.12363	0.31323	1	1	2470	tags=45%, list=23%, signal=59%
RAMASWAMY_METASTASIS_DN	29	0.313603	1.12293	0.268061	1	1	3081	tags=34%, list=28%, signal=48%
REACTOME_INFLUENZA_VIRAL_RNA_TRANSCRIPTION_AND_REPLICATION	57	0.481522	1.12121	0.424797	1	1	3124	tags=56%, list=29%, signal=78%
BILANGES_SERUM_RESPONSE_TRANSLATION	17	0.483426	1.11952	0.396414	1	1	3681	tags=53%, list=34%, signal=80%
PID_HIF2PATHWAY	15	0.385641	1.1178	0.323587	1	1	4537	tags=60%, list=42%, signal=103%
KEGG_PARKINSONS_DISEASE	74	0.362873	1.11701	0.371916	1	1	2889	tags=43%, list=27%, signal=59%
BIOCARTA_AT1R_PATHWAY	22	0.337935	1.11653	0.305439	1	1	1448	tags=23%, list=13%, signal=26%
BROWNE_HCMV_INFECTION_4HR_DN	139	0.228809	1.11575	0.251485	1	1	2967	tags=35%, list=27%, signal=47%
REACTOME_NONSENSE_MEDIATED_DECAY_ENHANCED_BY_THE_EXON_JUNCTION_COMPLEX	67	0.441539	1.1156	0.428862	1	1	3467	tags=55%, list=32%, signal=81%
PIONTEK_PKD1_TARGETS_UP	25	0.336697	1.11532	0.317121	1	1	1872	tags=28%, list=17%, signal=34%
FIGUEROA_AML_METHYLATION_CLUSTER_4_UP	59	0.27246	1.11461	0.272545	1	1	3189	tags=32%, list=29%, signal=45%
BIOCARTA_CARM_ER_PATHWAY	18	0.355142	1.11251	0.30083	1	1	1014	tags=22%, list=9%, signal=24%
ALCALA_APOPTOSIS	50	0.310805	1.11233	0.322457	1	1	1368	tags=24%, list=13%, signal=27%
REACTOME_MRNA_PROCESSING	87	0.326638	1.11218	0.36194	1	1	3685	tags=47%, list=34%, signal=71%
MIKKELSEN_MEF_HCP_WITH_H3K27ME3	296	0.264018	1.1115	0.272016	1	1	1382	tags=21%, list=13%, signal=23%
REACTOME_REGULATION_OF_GLUCOKINASE_BY_GLUCOKINASE_REGULATORY_PROTEIN	16	0.39602	1.1103	0.353271	1	1	2937	tags=50%, list=27%, signal=69%
DIRMEIER_LMP1_RESPONSE_LATE_DN	17	0.432864	1.10954	0.364198	1	1	2254	tags=47%, list=21%, signal=59%
REACTOME_NEP_NS2_INTERACTS_WITH_THE_CELLULAR_EXPORT_MACHINERY	15	0.412745	1.10835	0.356618	1	1	4541	tags=73%, list=42%, signal=126%
SANSOM_APC_TARGETS_REQUIRE_MYC	125	0.306482	1.10832	0.34542	1	1	2566	tags=32%, list=24%, signal=41%
SMID_BREAST_CANCER_LUMINAL_A_UP	43	0.357967	1.10825	0.308429	1	1	2451	tags=42%, list=23%, signal=54%
LANDIS_BREAST_CANCER_PROGRESSION_UP	29	0.347515	1.10722	0.335354	1	1	2746	tags=45%, list=25%, signal=60%
MIDORIKAWA_AMPLIFIED_IN_LIVER_CANCER	30	0.337963	1.1059	0.336673	1	1	1729	tags=30%, list=16%, signal=36%
DANG_MYC_TARGETS_UP	73	0.344196	1.10529	0.36673	1	1	2548	tags=37%, list=24%, signal=48%
LEE_LIVER_CANCER_ACOX1_DN	47	0.314097	1.10396	0.293878	1	1	1688	tags=28%, list=16%, signal=33%
LIM_MAMMARY_LUMINAL_PROGENITOR_UP	31	0.36482	1.10395	0.320312	1	1	2112	tags=39%, list=20%, signal=48%
NGUYEN_NOTCH1_TARGETS_DN	44	0.306009	1.10349	0.315682	1	1	3341	tags=41%, list=31%, signal=59%
RIGGINS_TAMOXIFEN_RESISTANCE_UP	42	0.317916	1.10322	0.321569	1	1	1108	tags=19%, list=10%, signal=21%
YAMASHITA_LIVER_CANCER_WITH_EPCAM_UP	32	0.395872	1.10285	0.375519	1	1	1038	tags=28%, list=10%, signal=31%
MANTOVANI_NFKB_TARGETS_UP	23	0.339703	1.10271	0.330677	1	1	2261	tags=30%, list=21%, signal=38%
VERHAAK_GLIOBLASTOMA_NEURAL	68	0.286229	1.10245	0.313929	1	1	3256	tags=44%, list=30%, signal=63%
CHANG_IMMORTALIZED_BY_HPV31_UP	39	0.299241	1.10074	0.298246	1	1	2014	tags=33%, list=19%, signal=41%
LU_EZH2_TARGETS_UP	162	0.31682	1.10036	0.379032	1	1	3478	tags=44%, list=32%, signal=64%
CERIBELLI_GENES_INACTIVE_AND_BOUND_BY_NFY	17	0.383336	1.09951	0.30814	1	1	1014	tags=24%, list=9%, signal=26%
MCGARVEY_SILENCED_BY_METHYLATION_IN_COLON_CANCER	22	0.349645	1.09864	0.321063	1	1	1768	tags=27%, list=16%, signal=33%
DAIRKEE_TERT_TARGETS_UP	203	0.310263	1.09787	0.366197	1	1	3051	tags=38%, list=28%, signal=52%
MARTORIATI_MDM4_TARGETS_FETAL_LIVER_UP	131	0.254653	1.09699	0.303605	1	1	2925	tags=36%, list=27%, signal=49%
LEE_LIVER_CANCER_DENA_DN	43	0.330603	1.09686	0.289524	1	1	1457	tags=26%, list=13%, signal=29%
REACTOME_3_UTR_MEDIATED_TRANSLATIONAL_REGULATION	66	0.468928	1.09536	0.433198	1	1	3128	tags=52%, list=29%, signal=72%
NIKOLSKY_BREAST_CANCER_11Q12_Q14_AMPLICON	76	0.377881	1.09459	0.382409	1	1	3612	tags=51%, list=33%, signal=76%
MURATA_VIRULENCE_OF_H_PILORI	15	0.424252	1.09404	0.34585	1	1	1490	tags=40%, list=14%, signal=46%
MCCLUNG_COCAINE_REWARD_5D	44	0.282591	1.09393	0.312253	1	1	1344	tags=20%, list=12%, signal=23%
BILANGES_SERUM_SENSITIVE_GENES	44	0.290837	1.09304	0.332039	1	1	3184	tags=43%, list=29%, signal=61%
LEIN_PONS_MARKERS	58	0.275539	1.09251	0.329293	1	1	2332	tags=29%, list=22%, signal=37%
NABA_ECM_AFFILIATED	96	0.297707	1.0917	0.33	1	1	1707	tags=28%, list=16%, signal=33%
LEE_LIVER_CANCER_E2F1_UP	41	0.308722	1.09122	0.333988	1	1	2359	tags=34%, list=22%, signal=43%
REACTOME_CLASS_B_2_SECRETIN_FAMILY_RECEPTORS	48	0.319042	1.09093	0.328685	1	1	401	tags=19%, list=4%, signal=19%
TONG_INTERACT_WITH_PTTG1	31	0.331274	1.09075	0.362525	1	1	2422	tags=32%, list=22%, signal=41%
SERVITJA_ISLET_HNF1A_TARGETS_DN	62	0.281904	1.09071	0.296146	1	1	2323	tags=34%, list=21%, signal=43%
MATZUK_CENTRAL_FOR_FEMALE_FERTILITY	16	0.375248	1.0903	0.339286	1	1	2259	tags=38%, list=21%, signal=47%
REACTOME_TRANSCRIPTIONAL_REGULATION_OF_WHITE_ADIPOCYTE_DIFFERENTIATION	47	0.28455	1.0895	0.364	1	1	1055	tags=17%, list=10%, signal=19%
REACTOME_PTM_GAMMA_CARBOXYLATION_HYPUSINE_FORMATION_AND_ARYLSULFATASE_ACTIVATION	20	0.372851	1.08941	0.37247	1	1	1188	tags=25%, list=11%, signal=28%
REACTOME_PI3K_EVENTS_IN_ERBB2_SIGNALING	22	0.353277	1.08905	0.354582	1	1	4391	tags=55%, list=41%, signal=92%
AMIT_SERUM_RESPONSE_480_MCF10A	19	0.434522	1.08881	0.401174	1	1	1087	tags=32%, list=10%, signal=35%
CHANDRAN_METASTASIS_TOP50_UP	18	0.372468	1.08819	0.362403	1	1	4292	tags=61%, list=40%, signal=101%
CHEN_LUNG_CANCER_SURVIVAL	18	0.374096	1.08761	0.352601	1	1	2329	tags=39%, list=22%, signal=49%
SUNG_METASTASIS_STROMA_DN	29	0.347916	1.08749	0.356747	1	1	3999	tags=45%, list=37%, signal=71%
ASGHARZADEH_NEUROBLASTOMA_POOR_SURVIVAL_DN	20	0.360736	1.08611	0.339468	1	1	3459	tags=60%, list=32%, signal=88%
CREIGHTON_ENDOCRINE_THERAPY_RESISTANCE_1	277	0.236966	1.08596	0.324701	1	1	2301	tags=26%, list=21%, signal=32%
REACTOME_TRAF6_MEDIATED_INDUCTION_OF_NFKB_AND_MAP_KINASES_UPON_TLR7_8_OR_9_ACTIVATION	44	0.287932	1.08466	0.348515	1	1	1870	tags=27%, list=17%, signal=33%
REACTOME_PROCESSING_OF_CAPPED_INTRON_CONTAINING_PRE_MRNA	78	0.327133	1.08462	0.378676	1	1	3685	tags=47%, list=34%, signal=71%
RICKMAN_TUMOR_DIFFERENTIATED_WELL_VS_MODERATELY_UP	67	0.277227	1.08395	0.339583	1	1	2038	tags=24%, list=19%, signal=29%
LEE_LIVER_CANCER_MYC_E2F1_DN	37	0.33096	1.08253	0.336614	1	1	1688	tags=27%, list=16%, signal=32%
KEGG_GNRH_SIGNALING_PATHWAY	63	0.267382	1.08039	0.340681	1	1	1690	tags=22%, list=16%, signal=26%
NING_CHRONIC_OBSTRUCTIVE_PULMONARY_DISEASE_UP	91	0.278757	1.0797	0.361538	1	1	2617	tags=33%, list=24%, signal=43%
BIOCARTA_CHREBP2_PATHWAY	30	0.312489	1.079	0.339468	1	1	2330	tags=30%, list=22%, signal=38%
BOCHKIS_FOXA2_TARGETS	245	0.218955	1.07694	0.293135	1	1	2512	tags=26%, list=23%, signal=33%
YAUCH_HEDGEHOG_SIGNALING_PARACRINE_DN	150	0.248324	1.07582	0.302846	1	1	1811	tags=22%, list=17%, signal=26%
MARTENS_TRETINOIN_RESPONSE_UP	418	0.274136	1.07546	0.339921	1	1	1539	tags=22%, list=14%, signal=25%
SESTO_RESPONSE_TO_UV_C2	33	0.326654	1.07406	0.372709	1	1	1722	tags=27%, list=16%, signal=32%
VART_KSHV_INFECTION_ANGIOGENIC_MARKERS_DN	73	0.293179	1.07379	0.348425	1	1	1700	tags=29%, list=16%, signal=34%
KEGG_TYROSINE_METABOLISM	31	0.330673	1.07371	0.348425	1	1	3955	tags=52%, list=37%, signal=81%
MURAKAMI_UV_RESPONSE_6HR_UP	21	0.358134	1.07338	0.357955	1	1	603	tags=19%, list=6%, signal=20%
REACTOME_TRANSPORT_OF_MATURE_TRANSCRIPT_TO_CYTOPLASM	32	0.350711	1.07188	0.386364	1	1	3685	tags=50%, list=34%, signal=76%
WATANABE_COLON_CANCER_MSI_VS_MSS_DN	40	0.304857	1.07186	0.350195	1	1	948	tags=18%, list=9%, signal=19%
GRAESSMANN_APOPTOSIS_BY_SERUM_DEPRIVATION_DN	133	0.26005	1.07108	0.356031	1	1	1884	tags=24%, list=17%, signal=29%
SMID_BREAST_CANCER_RELAPSE_IN_BONE_UP	57	0.287738	1.07052	0.369048	1	1	1884	tags=25%, list=17%, signal=30%
TSENG_ADIPOGENIC_POTENTIAL_DN	27	0.32489	1.06897	0.378218	1	1	2620	tags=33%, list=24%, signal=44%
REACTOME_METABOLISM_OF_VITAMINS_AND_COFACTORS	27	0.33201	1.06825	0.340385	1	1	2872	tags=37%, list=27%, signal=50%
MIKKELSEN_IPS_LCP_WITH_H3K4ME3	96	0.286397	1.06706	0.361111	1	1	1814	tags=26%, list=17%, signal=31%
MOOTHA_GLUCONEOGENESIS	22	0.354961	1.0666	0.363128	1	1	1874	tags=23%, list=17%, signal=27%
LINSLEY_MIR16_TARGETS	108	0.26039	1.06653	0.350575	1	1	3470	tags=38%, list=32%, signal=55%
WAKABAYASHI_ADIPOGENESIS_PPARG_RXRA_BOUND_36HR	94	0.239564	1.06622	0.342912	1	1	1641	tags=21%, list=15%, signal=25%
GINESTIER_BREAST_CANCER_ZNF217_AMPLIFIED_DN	188	0.317438	1.06473	0.398039	1	1	3787	tags=47%, list=35%, signal=72%
MIKKELSEN_IPS_HCP_WITH_H3_UNMETHYLATED	40	0.305201	1.06465	0.321361	1	1	1407	tags=25%, list=13%, signal=29%
IVANOVA_HEMATOPOIESIS_STEM_CELL_LONG_TERM	170	0.226724	1.06238	0.345098	1	1	1939	tags=21%, list=18%, signal=25%
IVANOVA_HEMATOPOIESIS_EARLY_PROGENITOR	301	0.212974	1.06149	0.327586	1	1	2689	tags=28%, list=25%, signal=37%
CHIBA_RESPONSE_TO_TSA_UP	32	0.346052	1.05988	0.409736	1	1	1070	tags=22%, list=10%, signal=24%
REACTOME_SIGNALING_BY_INSULIN_RECEPTOR	62	0.261824	1.05905	0.373047	1	1	2378	tags=27%, list=22%, signal=35%
PID_MTOR_4PATHWAY	44	0.295416	1.05571	0.366412	1	1	1872	tags=23%, list=17%, signal=27%
KEGG_INSULIN_SIGNALING_PATHWAY	89	0.244637	1.05416	0.377551	1	1	2384	tags=24%, list=22%, signal=30%
GROSS_HYPOXIA_VIA_ELK3_ONLY_UP	17	0.362104	1.05328	0.423598	1	1	596	tags=18%, list=6%, signal=19%
CHYLA_CBFA2T3_TARGETS_DN	131	0.231137	1.05325	0.354331	1	1	2922	tags=32%, list=27%, signal=43%
REACTOME_ION_TRANSPORT_BY_P_TYPE_ATPASES	17	0.364101	1.05301	0.381633	1	1	2323	tags=41%, list=21%, signal=52%
REACTOME_RNA_POL_II_TRANSCRIPTION	45	0.315186	1.05263	0.386973	1	1	3456	tags=49%, list=32%, signal=72%
VANLOO_SP3_TARGETS_DN	44	0.289533	1.0523	0.364892	1	1	3786	tags=50%, list=35%, signal=77%
NAKAYAMA_FGF2_TARGETS	16	0.388163	1.05194	0.411654	1	1	1852	tags=38%, list=17%, signal=45%
KEGG_DRUG_METABOLISM_OTHER_ENZYMES	20	0.35928	1.05193	0.385417	1	1	3793	tags=60%, list=35%, signal=92%
VECCHI_GASTRIC_CANCER_EARLY_UP	252	0.282346	1.05173	0.396887	1	1	2593	tags=29%, list=24%, signal=37%
SUBTIL_PROGESTIN_TARGETS	22	0.337345	1.05103	0.40625	1	1	3791	tags=45%, list=35%, signal=70%
REACTOME_GAB1_SIGNALOSOME	19	0.353177	1.05102	0.411881	1	1	4391	tags=47%, list=41%, signal=80%
NABA_MATRISOME_ASSOCIATED	419	0.255597	1.05081	0.364341	1	1	1762	tags=24%, list=16%, signal=28%
GRAESSMANN_RESPONSE_TO_MC_AND_SERUM_DEPRIVATION_DN	48	0.300051	1.05063	0.378906	1	1	2585	tags=33%, list=24%, signal=44%
BURTON_ADIPOGENESIS_PEAK_AT_24HR	28	0.394529	1.05024	0.41791	1	1	2834	tags=39%, list=26%, signal=53%
LUI_THYROID_CANCER_CLUSTER_3	22	0.398216	1.04985	0.431412	1	1	1826	tags=32%, list=17%, signal=38%
AGUIRRE_PANCREATIC_CANCER_COPY_NUMBER_UP	158	0.271133	1.04936	0.406551	1	1	2815	tags=33%, list=26%, signal=44%
MISHRA_CARCINOMA_ASSOCIATED_FIBROBLAST_DN	17	0.377123	1.04903	0.396857	1	1	472	tags=24%, list=4%, signal=25%
REACTOME_ACTIVATION_OF_THE_MRNA_UPON_BINDING_OF_THE_CAP_BINDING_COMPLEX_AND_EIFS_AND_SUBSEQUENT_BINDING_TO_43S	36	0.439252	1.04832	0.449187	1	1	3128	tags=47%, list=29%, signal=66%
CERVERA_SDHB_TARGETS_1_DN	20	0.355855	1.04796	0.39596	1	1	3508	tags=50%, list=32%, signal=74%
PHESSE_TARGETS_OF_APC_AND_MBD2_UP	16	0.358402	1.04785	0.418033	1	1	1982	tags=44%, list=18%, signal=53%
TSUNODA_CISPLATIN_RESISTANCE_DN	30	0.323973	1.04756	0.406015	1	1	1060	tags=17%, list=10%, signal=18%
MIKKELSEN_ES_HCP_WITH_H3_UNMETHYLATED	34	0.303055	1.04698	0.373469	1	1	2011	tags=29%, list=19%, signal=36%
WATTEL_AUTONOMOUS_THYROID_ADENOMA_DN	35	0.339805	1.04688	0.411321	1	1	3357	tags=49%, list=31%, signal=70%
HOFFMANN_IMMATURE_TO_MATURE_B_LYMPHOCYTE_DN	27	0.315842	1.04661	0.391892	1	1	3039	tags=41%, list=28%, signal=56%
LABBE_TGFB1_TARGETS_DN	56	0.276038	1.0444	0.379576	1	1	1070	tags=18%, list=10%, signal=20%
KEGG_DORSO_VENTRAL_AXIS_FORMATION	15	0.344363	1.04416	0.383838	1	1	1424	tags=27%, list=13%, signal=31%
BILD_CTNNB1_ONCOGENIC_SIGNATURE	47	0.312532	1.04337	0.404908	1	1	2218	tags=32%, list=20%, signal=40%
KEGG_GLYCEROPHOSPHOLIPID_METABOLISM	49	0.267538	1.04329	0.389662	1	1	2065	tags=27%, list=19%, signal=33%
ROVERSI_GLIOMA_COPY_NUMBER_DN	27	0.330011	1.04327	0.397313	1	1	2633	tags=37%, list=24%, signal=49%
REACTOME_METABOLISM_OF_RNA	145	0.310296	1.03999	0.413592	1	1	3203	tags=39%, list=30%, signal=55%
JOHANSSON_GLIOMAGENESIS_BY_PDGFB_DN	16	0.35586	1.03994	0.416495	1	1	828	tags=19%, list=8%, signal=20%
SARTIPY_NORMAL_AT_INSULIN_RESISTANCE_UP	23	0.330614	1.03987	0.380863	1	1	1541	tags=30%, list=14%, signal=35%
HOSHIDA_LIVER_CANCER_SUBCLASS_S2	73	0.288312	1.03795	0.412698	1	1	3501	tags=45%, list=32%, signal=66%
ST_GA13_PATHWAY	26	0.301946	1.03768	0.406709	1	1	2942	tags=42%, list=27%, signal=58%
REACTOME_METABOLISM_OF_CARBOHYDRATES	144	0.242326	1.03756	0.373016	1	1	2384	tags=29%, list=22%, signal=37%
ZWANG_EGF_PERSISTENTLY_DN	24	0.328772	1.03731	0.396226	1	1	2222	tags=29%, list=21%, signal=37%
ACEVEDO_NORMAL_TISSUE_ADJACENT_TO_LIVER_TUMOR_UP	93	0.237975	1.03707	0.386503	1	1	3382	tags=35%, list=31%, signal=51%
LEE_LIVER_CANCER_E2F1_DN	33	0.324548	1.03658	0.406844	1	1	1848	tags=30%, list=17%, signal=36%
ZWANG_DOWN_BY_2ND_EGF_PULSE	124	0.256924	1.03638	0.412731	1	1	4492	tags=56%, list=41%, signal=94%
PID_ERA_GENOMIC_PATHWAY	38	0.287678	1.03623	0.416988	1	1	3770	tags=45%, list=35%, signal=68%
PID_MAPK_TRK_PATHWAY	18	0.332138	1.03491	0.41683	1	1	1862	tags=28%, list=17%, signal=33%
VALK_AML_CLUSTER_13	19	0.343925	1.03482	0.422764	1	1	1113	tags=21%, list=10%, signal=23%
SHETH_LIVER_CANCER_VS_TXNIP_LOSS_PAM3	41	0.300795	1.03281	0.409266	1	1	1183	tags=24%, list=11%, signal=27%
FIGUEROA_AML_METHYLATION_CLUSTER_1_UP	58	0.259504	1.03229	0.400771	1	1	1506	tags=19%, list=14%, signal=22%
ENK_UV_RESPONSE_KERATINOCYTE_UP	329	0.291999	1.03227	0.417339	1	1	2890	tags=36%, list=27%, signal=47%
YAGI_AML_WITH_INV_16_TRANSLOCATION	232	0.212484	1.03114	0.385519	1	1	1722	tags=22%, list=16%, signal=25%
REACTOME_GLUCOSE_TRANSPORT	23	0.327634	1.02911	0.410646	1	1	2937	tags=43%, list=27%, signal=60%
FIGUEROA_AML_METHYLATION_CLUSTER_3_DN	25	0.333043	1.02896	0.428287	1	1	2411	tags=28%, list=22%, signal=36%
SMIRNOV_RESPONSE_TO_IR_2HR_DN	27	0.321284	1.02856	0.405882	1	1	3531	tags=48%, list=33%, signal=71%
CHIARETTI_ACUTE_LYMPHOBLASTIC_LEUKEMIA_ZAP70	29	0.298687	1.02792	0.427699	1	1	1416	tags=21%, list=13%, signal=24%
LOCKWOOD_AMPLIFIED_IN_LUNG_CANCER	128	0.263837	1.02582	0.439539	1	1	3297	tags=40%, list=30%, signal=57%
MURAKAMI_UV_RESPONSE_6HR_DN	17	0.36621	1.02502	0.410463	1	1	617	tags=18%, list=6%, signal=19%
BYSTRYKH_HEMATOPOIESIS_STEM_CELL_AND_BRAIN_QTL_TRANS	108	0.235998	1.02445	0.39434	1	1	2395	tags=27%, list=22%, signal=34%
TCGA_GLIOBLASTOMA_COPY_NUMBER_UP	42	0.303386	1.02347	0.412955	1	1	2015	tags=31%, list=19%, signal=38%
GENTILE_UV_RESPONSE_CLUSTER_D7	16	0.360141	1.02326	0.412698	1	1	1832	tags=25%, list=17%, signal=30%
ROESSLER_LIVER_CANCER_METASTASIS_DN	31	0.281217	1.0231	0.40619	1	1	3302	tags=45%, list=30%, signal=65%
GROSS_HYPOXIA_VIA_HIF1A_DN	63	0.254679	1.02217	0.404135	1	1	2395	tags=29%, list=22%, signal=36%
CAIRO_HEPATOBLASTOMA_DN	153	0.244417	1.02211	0.409962	1	1	2112	tags=26%, list=20%, signal=32%
KOHOUTEK_CCNT2_TARGETS	34	0.283364	1.02161	0.44181	1	1	2597	tags=32%, list=24%, signal=42%
CREIGHTON_AKT1_SIGNALING_VIA_MTOR_DN	15	0.460335	1.02069	0.483301	1	1	4574	tags=73%, list=42%, signal=127%
KEEN_RESPONSE_TO_ROSIGLITAZONE_UP	21	0.335473	1.02035	0.433206	1	1	1995	tags=33%, list=18%, signal=41%
FIGUEROA_AML_METHYLATION_CLUSTER_3_UP	80	0.24547	1.01993	0.397614	1	1	3189	tags=35%, list=29%, signal=49%
KEGG_PENTOSE_PHOSPHATE_PATHWAY	16	0.375109	1.01988	0.46063	1	1	2203	tags=44%, list=20%, signal=55%
ACOSTA_PROLIFERATION_INDEPENDENT_MYC_TARGETS_UP	49	0.284353	1.01898	0.445564	1	1	2395	tags=29%, list=22%, signal=37%
POMEROY_MEDULLOBLASTOMA_PROGNOSIS_DN	27	0.365558	1.01802	0.454728	1	1	2127	tags=33%, list=20%, signal=41%
NIKOLSKY_BREAST_CANCER_7P22_AMPLICON	23	0.419083	1.01768	0.451362	1	1	3931	tags=57%, list=36%, signal=89%
HEIDENBLAD_AMPLICON_12P11_12_DN	18	0.342665	1.01712	0.447525	1	1	4090	tags=44%, list=38%, signal=71%
TERAMOTO_OPN_TARGETS_CLUSTER_6	16	0.34377	1.01669	0.432749	1	1	1224	tags=31%, list=11%, signal=35%
DANG_REGULATED_BY_MYC_UP	39	0.306047	1.01531	0.442164	1	1	3119	tags=36%, list=29%, signal=50%
LUI_THYROID_CANCER_CLUSTER_1	29	0.276424	1.01502	0.421442	1	1	2563	tags=34%, list=24%, signal=45%
HOSHIDA_LIVER_CANCER_LATE_RECURRENCE_DN	41	0.280002	1.01409	0.420949	1	1	2148	tags=29%, list=20%, signal=36%
DARWICHE_PAPILLOMA_RISK_LOW_DN	79	0.226787	1.01273	0.428854	1	1	1332	tags=16%, list=12%, signal=19%
YAO_TEMPORAL_RESPONSE_TO_PROGESTERONE_CLUSTER_9	42	0.279682	1.01266	0.429942	1	1	1339	tags=19%, list=12%, signal=22%
YANG_BREAST_CANCER_ESR1_BULK_UP	17	0.331253	1.01234	0.433781	1	1	3172	tags=47%, list=29%, signal=66%
MOOTHA_PGC	241	0.250418	1.01167	0.429942	1	1	3219	tags=34%, list=30%, signal=48%
WELCSH_BRCA1_TARGETS_DN	82	0.337276	1.01138	0.459924	1	1	3679	tags=49%, list=34%, signal=73%
REACTOME_CLEAVAGE_OF_GROWING_TRANSCRIPT_IN_THE_TERMINATION_REGION_	25	0.356845	1.01074	0.43222	1	1	2915	tags=44%, list=27%, signal=60%
FERNANDEZ_BOUND_BY_MYC	106	0.246347	1.0094	0.416342	1	1	1992	tags=20%, list=18%, signal=24%
BURTON_ADIPOGENESIS_5	76	0.298933	1.00916	0.459662	1	1	2272	tags=29%, list=21%, signal=36%
MUELLER_PLURINET	169	0.28489	1.00849	0.45351	1	1	4250	tags=47%, list=39%, signal=77%
ASTON_MAJOR_DEPRESSIVE_DISORDER_UP	23	0.342593	1.00685	0.440083	1	1	1445	tags=22%, list=13%, signal=25%
HILLION_HMGA1B_TARGETS	50	0.280438	1.00667	0.418349	1	1	4547	tags=64%, list=42%, signal=110%
YOKOE_CANCER_TESTIS_ANTIGENS	18	0.327075	1.00531	0.442656	1	1	2317	tags=28%, list=21%, signal=35%
GEORGES_CELL_CYCLE_MIR192_TARGETS	41	0.339444	1.00361	0.463938	1	1	3501	tags=46%, list=32%, signal=68%
KEGG_BASAL_CELL_CARCINOMA	34	0.313779	1.00341	0.457831	1	1	392	tags=15%, list=4%, signal=15%
LANDIS_ERBB2_BREAST_TUMORS_324_UP	90	0.251656	1.00341	0.422397	1	1	3064	tags=34%, list=28%, signal=48%
WAGNER_APO2_SENSITIVITY	16	0.363842	1.00338	0.456967	1	1	919	tags=31%, list=8%, signal=34%
BYSTROEM_CORRELATED_WITH_IL5_UP	32	0.28644	1.00332	0.445344	1	1	2932	tags=38%, list=27%, signal=51%
BROWNE_HCMV_INFECTION_6HR_UP	36	0.294324	1.00293	0.445122	1	1	1595	tags=25%, list=15%, signal=29%
MCCABE_BOUND_BY_HOXC6	230	0.1981	1.00289	0.448276	1	1	2307	tags=23%, list=21%, signal=29%
LEE_LIVER_CANCER_MYC_TGFA_DN	34	0.305236	1.00138	0.45539	1	1	2863	tags=41%, list=26%, signal=56%
MCDOWELL_ACUTE_LUNG_INJURY_DN	21	0.332539	1.00043	0.456107	1	1	2400	tags=43%, list=22%, signal=55%
HALMOS_CEBPA_TARGETS_UP	25	0.339158	0.998928	0.448819	1	1	2850	tags=36%, list=26%, signal=49%
VANDESLUIS_COMMD1_TARGETS_GROUP_3_DN	25	0.321494	0.998783	0.432806	1	1	2808	tags=36%, list=26%, signal=48%
ENK_UV_RESPONSE_EPIDERMIS_UP	164	0.252219	0.997517	0.456274	1	1	1337	tags=17%, list=12%, signal=19%
SIG_CD40PATHWAYMAP	22	0.316432	0.996635	0.432	1	1	2942	tags=36%, list=27%, signal=50%
BILANGES_RAPAMYCIN_SENSITIVE_VIA_TSC1_AND_TSC2	44	0.339279	0.996565	0.448343	1	1	3084	tags=43%, list=28%, signal=60%
LI_LUNG_CANCER	20	0.343235	0.995615	0.473373	1	1	3332	tags=45%, list=31%, signal=65%
TANAKA_METHYLATED_IN_ESOPHAGEAL_CARCINOMA	63	0.276668	0.993961	0.466411	1	1	2898	tags=41%, list=27%, signal=56%
KEGG_METABOLISM_OF_XENOBIOTICS_BY_CYTOCHROME_P450	35	0.353897	0.993645	0.453094	1	1	3346	tags=54%, list=31%, signal=78%
FRIDMAN_IMMORTALIZATION_DN	21	0.322738	0.992977	0.464844	1	1	1287	tags=29%, list=12%, signal=32%
REACTOME_MRNA_SPLICING	61	0.310121	0.99267	0.469725	1	1	3685	tags=46%, list=34%, signal=69%
MIKKELSEN_ES_ICP_WITH_H3K4ME3_AND_H3K27ME3	70	0.278735	0.992554	0.465619	1	1	2134	tags=27%, list=20%, signal=34%
BRUINS_UVC_RESPONSE_EARLY_LATE	168	0.214453	0.99077	0.449902	1	1	3427	tags=35%, list=32%, signal=50%
ACEVEDO_FGFR1_TARGETS_IN_PROSTATE_CANCER_MODEL_UP	172	0.229751	0.990494	0.464844	1	1	1711	tags=20%, list=16%, signal=24%
SCHLINGEMANN_SKIN_CARCINOGENESIS_TPA_DN	18	0.343585	0.99022	0.481262	1	1	2503	tags=28%, list=23%, signal=36%
VECCHI_GASTRIC_CANCER_ADVANCED_VS_EARLY_DN	82	0.276296	0.990219	0.462687	1	1	2505	tags=37%, list=23%, signal=47%
WIKMAN_ASBESTOS_LUNG_CANCER_DN	16	0.324792	0.990009	0.476099	1	1	1149	tags=25%, list=11%, signal=28%
SESTO_RESPONSE_TO_UV_C0	62	0.261415	0.989156	0.465779	1	1	3543	tags=44%, list=33%, signal=64%
ZHAN_MULTIPLE_MYELOMA_CD2_DN	24	0.30303	0.987974	0.455796	1	1	2302	tags=29%, list=21%, signal=37%
KEGG_VASCULAR_SMOOTH_MUSCLE_CONTRACTION	71	0.252404	0.986907	0.48622	1	1	1690	tags=21%, list=16%, signal=25%
MIKKELSEN_MCV6_HCP_WITH_H3K27ME3	223	0.24183	0.98474	0.486486	1	1	2623	tags=31%, list=24%, signal=40%
FERREIRA_EWINGS_SARCOMA_UNSTABLE_VS_STABLE_DN	54	0.271909	0.98469	0.444444	1	1	2255	tags=28%, list=21%, signal=35%
PID_ATF2_PATHWAY	33	0.287192	0.984558	0.46516	1	1	1862	tags=24%, list=17%, signal=29%
AMIT_EGF_RESPONSE_480_MCF10A	17	0.362802	0.984092	0.491262	1	1	2866	tags=41%, list=26%, signal=56%
HUPER_BREAST_BASAL_VS_LUMINAL_DN	41	0.295975	0.983732	0.460501	1	1	1339	tags=20%, list=12%, signal=22%
REACTOME_NEUROTRANSMITTER_RELEASE_CYCLE	19	0.318518	0.983006	0.485265	1	1	847	tags=26%, list=8%, signal=28%
SHETH_LIVER_CANCER_VS_TXNIP_LOSS_PAM2	93	0.22328	0.982742	0.5	1	1	2409	tags=28%, list=22%, signal=36%
LEE_LIVER_CANCER	28	0.379861	0.979498	0.517454	1	1	1414	tags=32%, list=13%, signal=37%
MOREAUX_B_LYMPHOCYTE_MATURATION_BY_TACI_UP	53	0.283704	0.979439	0.475708	1	1	3184	tags=40%, list=29%, signal=56%
MOOTHA_HUMAN_MITODB_6_2002	264	0.262639	0.978369	0.472486	1	1	3134	tags=37%, list=29%, signal=50%
SCIAN_INVERSED_TARGETS_OF_TP53_AND_TP73_DN	21	0.320026	0.97788	0.482759	1	1	2520	tags=29%, list=23%, signal=37%
GROSS_ELK3_TARGETS_DN	15	0.338118	0.977685	0.492366	1	1	316	tags=13%, list=3%, signal=14%
BROWNE_HCMV_INFECTION_8HR_DN	21	0.304728	0.977411	0.4714	1	1	4214	tags=52%, list=39%, signal=86%
LAIHO_COLORECTAL_CANCER_SERRATED_DN	50	0.286914	0.976559	0.476289	1	1	3210	tags=40%, list=30%, signal=57%
BHATI_G2M_ARREST_BY_2METHOXYESTRADIOL_UP	59	0.259371	0.974004	0.482955	1	1	1923	tags=24%, list=18%, signal=29%
OHGUCHI_LIVER_HNF4A_TARGETS_DN	76	0.265093	0.973356	0.491089	1	1	1969	tags=32%, list=18%, signal=38%
KEGG_ABC_TRANSPORTERS	23	0.303526	0.969984	0.498024	1	1	1407	tags=22%, list=13%, signal=25%
CHEN_NEUROBLASTOMA_COPY_NUMBER_GAINS	26	0.310581	0.969394	0.509921	1	1	2155	tags=31%, list=20%, signal=38%
KIM_WT1_TARGETS_12HR_DN	129	0.236754	0.969271	0.475096	1	1	3719	tags=44%, list=34%, signal=66%
BENPORATH_MYC_TARGETS_WITH_EBOX	133	0.238285	0.968396	0.471264	1	1	2254	tags=24%, list=21%, signal=30%
ENGELMANN_CANCER_PROGENITORS_UP	36	0.2695	0.968089	0.483748	1	1	1344	tags=22%, list=12%, signal=25%
GRADE_COLON_VS_RECTAL_CANCER_DN	26	0.285145	0.967468	0.515091	1	1	2915	tags=38%, list=27%, signal=53%
STEIN_ESRRA_TARGETS_DN	52	0.2458	0.967308	0.499018	1	1	2713	tags=33%, list=25%, signal=43%
REACTOME_METABOLISM_OF_MRNA	123	0.297414	0.966262	0.492157	1	1	3203	tags=37%, list=30%, signal=53%
BIOCARTA_RHO_PATHWAY	17	0.324127	0.962916	0.508032	1	1	3640	tags=47%, list=34%, signal=71%
SCHAEFFER_PROSTATE_DEVELOPMENT_12HR_UP	69	0.255617	0.962867	0.464627	1	1	2654	tags=32%, list=25%, signal=42%
ST_GAQ_PATHWAY	18	0.32558	0.961598	0.515658	1	1	2942	tags=39%, list=27%, signal=53%
ST_FAS_SIGNALING_PATHWAY	31	0.263873	0.961429	0.525735	1	1	3532	tags=35%, list=33%, signal=53%
REACTOME_PHASE1_FUNCTIONALIZATION_OF_COMPOUNDS	35	0.369446	0.960243	0.515337	1	1	1326	tags=34%, list=12%, signal=39%
JECHLINGER_EPITHELIAL_TO_MESENCHYMAL_TRANSITION_DN	41	0.299324	0.959212	0.506718	1	1	3306	tags=46%, list=31%, signal=66%
RIZ_ERYTHROID_DIFFERENTIATION_HBZ	26	0.300265	0.958344	0.493069	1	1	2470	tags=31%, list=23%, signal=40%
YAMASHITA_LIVER_CANCER_STEM_CELL_DN	43	0.320946	0.956855	0.548902	1	1	2952	tags=47%, list=27%, signal=64%
OZEN_MIR125B1_TARGETS	19	0.316364	0.956813	0.517717	1	1	4297	tags=63%, list=40%, signal=105%
NABA_SECRETED_FACTORS	182	0.248447	0.955968	0.51503	1	1	1411	tags=20%, list=13%, signal=22%
TOOKER_GEMCITABINE_RESISTANCE_UP	43	0.279341	0.955437	0.484909	1	1	3430	tags=47%, list=32%, signal=68%
REACTOME_MYD88_MAL_CASCADE_INITIATED_ON_PLASMA_MEMBRANE	49	0.245177	0.955408	0.511673	1	1	1870	tags=24%, list=17%, signal=29%
REACTOME_MRNA_3_END_PROCESSING	20	0.347057	0.955389	0.507722	1	1	3685	tags=50%, list=34%, signal=76%
GINESTIER_BREAST_CANCER_20Q13_AMPLIFICATION_DN	86	0.245519	0.955153	0.507491	1	1	3227	tags=31%, list=30%, signal=44%
SMID_BREAST_CANCER_BASAL_DN	381	0.203521	0.952814	0.518072	1	1	2463	tags=26%, list=23%, signal=33%
GRAESSMANN_RESPONSE_TO_MC_AND_DOXORUBICIN_DN	429	0.196711	0.951988	0.518868	1	1	2194	tags=22%, list=20%, signal=27%
KEGG_CYSTEINE_AND_METHIONINE_METABOLISM	22	0.311752	0.951943	0.539526	1	1	556	tags=14%, list=5%, signal=14%
REACTOME_PLATELET_AGGREGATION_PLUG_FORMATION	19	0.350542	0.949368	0.52686	1	1	4391	tags=68%, list=41%, signal=115%
RODWELL_AGING_KIDNEY_DN	79	0.237876	0.949204	0.510848	1	1	2421	tags=27%, list=22%, signal=34%
WANG_ADIPOGENIC_GENES_REPRESSED_BY_SIRT1	17	0.350142	0.948833	0.5197	1	1	2254	tags=41%, list=21%, signal=52%
FARMER_BREAST_CANCER_BASAL_VS_LULMINAL	208	0.197272	0.948784	0.542694	1	1	1337	tags=15%, list=12%, signal=17%
HUANG_DASATINIB_RESISTANCE_DN	39	0.254627	0.947353	0.507843	1	1	2948	tags=31%, list=27%, signal=42%
WANG_RESPONSE_TO_BEXAROTENE_UP	22	0.284148	0.946898	0.520446	1	1	3135	tags=32%, list=29%, signal=45%
MOOTHA_MITOCHONDRIA	270	0.251377	0.94653	0.503802	1	1	3586	tags=40%, list=33%, signal=58%
REACTOME_POST_NMDA_RECEPTOR_ACTIVATION_EVENTS	18	0.310652	0.94597	0.518987	1	1	1397	tags=22%, list=13%, signal=25%
SUMI_HNF4A_TARGETS	16	0.336858	0.945442	0.55642	1	1	707	tags=19%, list=7%, signal=20%
CHNG_MULTIPLE_MYELOMA_HYPERPLOID_UP	33	0.392301	0.945334	0.530693	1	1	2127	tags=39%, list=20%, signal=49%
REACTOME_REGULATION_OF_BETA_CELL_DEVELOPMENT	19	0.315611	0.944616	0.5	1	1	1621	tags=26%, list=15%, signal=31%
KIM_ALL_DISORDERS_OLIGODENDROCYTE_NUMBER_CORR_DN	16	0.322966	0.944571	0.529046	1	1	2732	tags=38%, list=25%, signal=50%
KEGG_MAPK_SIGNALING_PATHWAY	160	0.209289	0.943978	0.517691	1	1	1870	tags=21%, list=17%, signal=25%
SCHLOSSER_MYC_TARGETS_AND_SERUM_RESPONSE_DN	24	0.347277	0.942286	0.501901	1	1	2325	tags=42%, list=21%, signal=53%
DURCHDEWALD_SKIN_CARCINOGENESIS_UP	61	0.255832	0.942071	0.53945	1	1	2047	tags=26%, list=19%, signal=32%
KEGG_MELANOGENESIS	59	0.233221	0.941999	0.523139	1	1	498	tags=12%, list=5%, signal=12%
BURTON_ADIPOGENESIS_PEAK_AT_8HR	23	0.293795	0.941634	0.536539	1	1	3025	tags=48%, list=28%, signal=66%
KARLSSON_TGFB1_TARGETS_UP	74	0.268847	0.941346	0.516252	1	1	3821	tags=51%, list=35%, signal=79%
GROSS_HYPOXIA_VIA_ELK3_AND_HIF1A_DN	54	0.237464	0.941221	0.541414	1	1	1934	tags=24%, list=18%, signal=29%
RODRIGUES_NTN1_AND_DCC_TARGETS	20	0.318177	0.94118	0.511811	1	1	2281	tags=35%, list=21%, signal=44%
REACTOME_TRIGLYCERIDE_BIOSYNTHESIS	20	0.334967	0.939164	0.528545	1	1	2001	tags=25%, list=18%, signal=31%
RASHI_RESPONSE_TO_IONIZING_RADIATION_2	80	0.262236	0.938775	0.530418	1	1	3332	tags=36%, list=31%, signal=52%
WONG_MITOCHONDRIA_GENE_MODULE	132	0.295038	0.938234	0.51277	1	1	3771	tags=45%, list=35%, signal=68%
RICKMAN_METASTASIS_DN	135	0.303599	0.937809	0.529762	1	1	2447	tags=36%, list=23%, signal=45%
BENPORATH_MYC_MAX_TARGETS	438	0.19617	0.93636	0.544933	1	1	3403	tags=32%, list=31%, signal=44%
KEGG_BASAL_TRANSCRIPTION_FACTORS	16	0.334858	0.936177	0.538934	1	1	3331	tags=56%, list=31%, signal=81%
BIOCARTA_INTRINSIC_PATHWAY	15	0.444273	0.935815	0.575884	1	1	2649	tags=47%, list=24%, signal=62%
PRAMOONJAGO_SOX4_TARGETS_UP	28	0.299731	0.934939	0.534517	1	1	1920	tags=29%, list=18%, signal=35%
REACTOME_PI3K_EVENTS_IN_ERBB4_SIGNALING	19	0.316826	0.934618	0.545817	1	1	4391	tags=53%, list=41%, signal=88%
IVANOVSKA_MIR106B_TARGETS	47	0.259164	0.934579	0.533207	1	1	806	tags=17%, list=7%, signal=18%
BORCZUK_MALIGNANT_MESOTHELIOMA_DN	51	0.277757	0.934301	0.540161	1	1	1884	tags=24%, list=17%, signal=28%
SMID_BREAST_CANCER_BASAL_UP	375	0.213163	0.934091	0.555766	1	1	1724	tags=19%, list=16%, signal=22%
REACTOME_OLFACTORY_SIGNALING_PATHWAY	27	0.290562	0.933852	0.552846	1	1	3268	tags=48%, list=30%, signal=69%
KEGG_ARACHIDONIC_ACID_METABOLISM	31	0.318197	0.933841	0.530364	1	1	1523	tags=26%, list=14%, signal=30%
COATES_MACROPHAGE_M1_VS_M2_DN	41	0.254375	0.933481	0.535294	1	1	1710	tags=24%, list=16%, signal=29%
MIKKELSEN_ES_ICP_WITH_H3K4ME3	388	0.191946	0.930998	0.601695	1	1	2183	tags=23%, list=20%, signal=27%
REACTOME_LIPOPROTEIN_METABOLISM	16	0.330723	0.930762	0.540594	1	1	3141	tags=38%, list=29%, signal=53%
REACTOME_METABOLISM_OF_NON_CODING_RNA	24	0.322983	0.92993	0.52583	1	1	3556	tags=54%, list=33%, signal=80%
JUBAN_TARGETS_OF_SPI1_AND_FLI1_DN	57	0.250983	0.929372	0.540797	1	1	2920	tags=37%, list=27%, signal=50%
MOREIRA_RESPONSE_TO_TSA_UP	16	0.367303	0.9284	0.522863	1	1	4193	tags=63%, list=39%, signal=102%
IWANAGA_CARCINOGENESIS_BY_KRAS_UP	94	0.21778	0.928089	0.550285	1	1	1692	tags=21%, list=16%, signal=25%
MIKKELSEN_NPC_HCP_WITH_H3K27ME3	180	0.228228	0.92806	0.55773	1	1	2223	tags=26%, list=21%, signal=32%
NAKAMURA_TUMOR_ZONE_PERIPHERAL_VS_CENTRAL_DN	353	0.203533	0.928037	0.563786	1	1	2865	tags=31%, list=26%, signal=40%
REACTOME_SIGNALING_BY_ERBB4	46	0.253341	0.927124	0.585938	1	1	3510	tags=39%, list=32%, signal=58%
MEISSNER_NPC_HCP_WITH_H3K4ME2_AND_H3K27ME3	184	0.22264	0.92705	0.564054	1	1	1795	tags=21%, list=17%, signal=25%
KOINUMA_TARGETS_OF_SMAD2_OR_SMAD3	486	0.20352	0.926769	0.558767	1	1	3344	tags=33%, list=31%, signal=46%
DARWICHE_PAPILLOMA_PROGRESSION_RISK	43	0.246221	0.926523	0.579051	1	1	3327	tags=40%, list=31%, signal=57%
REACTOME_ACTIVATION_OF_GENES_BY_ATF4	15	0.321365	0.925614	0.541833	1	1	1211	tags=27%, list=11%, signal=30%
ACEVEDO_NORMAL_TISSUE_ADJACENT_TO_LIVER_TUMOR_DN	202	0.236133	0.924336	0.527778	1	1	3163	tags=34%, list=29%, signal=47%
KEGG_HISTIDINE_METABOLISM	15	0.32453	0.923988	0.563786	1	1	436	tags=13%, list=4%, signal=14%
IVANOVA_HEMATOPOIESIS_STEM_CELL_SHORT_TERM	15	0.346669	0.92384	0.576687	1	1	2713	tags=53%, list=25%, signal=71%
BLALOCK_ALZHEIMERS_DISEASE_INCIPIENT_DN	98	0.218004	0.923006	0.554672	1	1	3063	tags=36%, list=28%, signal=49%
SANSOM_APC_TARGETS	114	0.2025	0.922983	0.609943	1	1	1095	tags=15%, list=10%, signal=16%
CHANGOLKAR_H2AFY_TARGETS_UP	31	0.250371	0.921378	0.582178	1	1	3156	tags=32%, list=29%, signal=45%
PEDERSEN_METASTASIS_BY_ERBB2_ISOFORM_4	57	0.255674	0.920903	0.580198	1	1	1086	tags=21%, list=10%, signal=23%
DELACROIX_RAR_BOUND_ES	268	0.186719	0.920807	0.638996	1	1	1714	tags=18%, list=16%, signal=20%
GERHOLD_ADIPOGENESIS_UP	28	0.27505	0.919654	0.570297	1	1	2001	tags=25%, list=18%, signal=31%
YAO_HOXA10_TARGETS_VIA_PROGESTERONE_UP	48	0.266986	0.91886	0.569767	1	1	2650	tags=33%, list=24%, signal=44%
NABA_ECM_REGULATORS	141	0.244019	0.918745	0.549708	1	1	1762	tags=25%, list=16%, signal=29%
ST_JNK_MAPK_PATHWAY	21	0.2728	0.917346	0.553435	1	1	1487	tags=19%, list=14%, signal=22%
GAUSSMANN_MLL_AF4_FUSION_TARGETS_G_UP	128	0.205978	0.916625	0.614931	1	1	2035	tags=23%, list=19%, signal=28%
AIYAR_COBRA1_TARGETS_DN	16	0.30987	0.914511	0.571146	1	1	3524	tags=44%, list=33%, signal=65%
HARRIS_HYPOXIA	40	0.287048	0.914404	0.571709	1	1	2344	tags=28%, list=22%, signal=35%
MODY_HIPPOCAMPUS_PRENATAL	28	0.316546	0.914196	0.552063	1	1	2018	tags=36%, list=19%, signal=44%
PID_RHOA_PATHWAY	29	0.259743	0.913915	0.571429	1	1	3235	tags=38%, list=30%, signal=54%
KEGG_ARRHYTHMOGENIC_RIGHT_VENTRICULAR_CARDIOMYOPATHY_ARVC	46	0.260833	0.912934	0.567568	1	1	1236	tags=20%, list=11%, signal=22%
LEIN_MEDULLA_MARKERS	47	0.231325	0.912265	0.584466	1	1	2909	tags=30%, list=27%, signal=41%
MADAN_DPPA4_TARGETS	28	0.279844	0.910467	0.581818	1	1	1078	tags=18%, list=10%, signal=20%
OUELLET_CULTURED_OVARIAN_CANCER_INVASIVE_VS_LMP_UP	43	0.259757	0.910276	0.552239	1	1	4208	tags=51%, list=39%, signal=83%
OLSSON_E2F3_TARGETS_UP	18	0.326079	0.910097	0.543307	1	1	1490	tags=22%, list=14%, signal=26%
OUILLETTE_CLL_13Q14_DELETION_UP	35	0.268253	0.90996	0.610638	1	1	4240	tags=54%, list=39%, signal=89%
MOOTHA_GLYCOGEN_METABOLISM	15	0.308807	0.909093	0.585683	1	1	2384	tags=33%, list=22%, signal=43%
WEI_MYCN_TARGETS_WITH_E_BOX	449	0.220872	0.908321	0.536313	1	1	3525	tags=34%, list=33%, signal=49%
RAY_TUMORIGENESIS_BY_ERBB2_CDC25A_DN	88	0.227819	0.907786	0.609375	1	1	2002	tags=24%, list=18%, signal=29%
BIOCARTA_RACCYCD_PATHWAY	15	0.323767	0.907591	0.554902	1	1	3151	tags=40%, list=29%, signal=56%
ELVIDGE_HYPOXIA_BY_DMOG_DN	30	0.284457	0.90751	0.585821	1	1	1524	tags=17%, list=14%, signal=19%
ZAMORA_NOS2_TARGETS_UP	41	0.295423	0.906701	0.542308	1	1	2770	tags=29%, list=26%, signal=39%
OSMAN_BLADDER_CANCER_DN	213	0.214554	0.906187	0.552147	1	1	3809	tags=41%, list=35%, signal=62%
LEE_LIVER_CANCER_MYC_E2F1_UP	36	0.25432	0.906022	0.595285	1	1	2359	tags=33%, list=22%, signal=42%
SAKAI_CHRONIC_HEPATITIS_VS_LIVER_CANCER_DN	23	0.299323	0.905553	0.581162	1	1	1786	tags=26%, list=16%, signal=31%
YANG_BREAST_CANCER_ESR1_UP	24	0.27706	0.905523	0.590726	1	1	817	tags=17%, list=8%, signal=18%
ELVIDGE_HIF1A_AND_HIF2A_TARGETS_UP	21	0.312724	0.904181	0.574713	1	1	2194	tags=33%, list=20%, signal=42%
WONG_EMBRYONIC_STEM_CELL_CORE	205	0.269589	0.904164	0.540741	1	1	4135	tags=45%, list=38%, signal=71%
REACTOME_PREFOLDIN_MEDIATED_TRANSFER_OF_SUBSTRATE_TO_CCT_TRIC	20	0.337976	0.903517	0.586207	1	1	2756	tags=45%, list=25%, signal=60%
KEGG_TIGHT_JUNCTION	74	0.219133	0.902695	0.614662	1	1	2170	tags=27%, list=20%, signal=34%
KEGG_REGULATION_OF_AUTOPHAGY	17	0.302292	0.902277	0.566265	1	1	900	tags=24%, list=8%, signal=26%
REACTOME_TRANSPORT_OF_MATURE_MRNA_DERIVED_FROM_AN_INTRONLESS_TRANSCRIPT	21	0.31361	0.900979	0.591418	1	1	2937	tags=43%, list=27%, signal=59%
ACEVEDO_FGFR1_TARGETS_IN_PROSTATE_CANCER_MODEL_DN	181	0.208691	0.900744	0.644269	1	1	2611	tags=28%, list=24%, signal=36%
SESTO_RESPONSE_TO_UV_C1	50	0.2713	0.900601	0.575419	1	1	1439	tags=22%, list=13%, signal=25%
REACTOME_GASTRIN_CREB_SIGNALLING_PATHWAY_VIA_PKC_AND_MAPK	117	0.224795	0.900513	0.616633	1	1	2129	tags=28%, list=20%, signal=35%
RODWELL_AGING_KIDNEY_NO_BLOOD_DN	86	0.229936	0.900255	0.590099	1	1	2306	tags=24%, list=21%, signal=31%
WANG_BARRETTS_ESOPHAGUS_DN	15	0.373549	0.899685	0.556405	1	1	971	tags=27%, list=9%, signal=29%
KYNG_DNA_DAMAGE_BY_GAMMA_RADIATION	48	0.233114	0.899617	0.607143	1	1	3320	tags=35%, list=31%, signal=51%
BRUINS_UVC_RESPONSE_VIA_TP53_GROUP_B	313	0.194493	0.899318	0.621154	1	1	1975	tags=22%, list=18%, signal=26%
LIU_VMYB_TARGETS_UP	78	0.208261	0.897773	0.639313	1	1	2796	tags=29%, list=26%, signal=39%
YAMAZAKI_TCEB3_TARGETS_DN	134	0.203812	0.897578	0.613153	1	1	1420	tags=16%, list=13%, signal=18%
ROVERSI_GLIOMA_COPY_NUMBER_UP	56	0.26306	0.897176	0.561508	1	1	2278	tags=32%, list=21%, signal=40%
REACTOME_G_ALPHA_Q_SIGNALLING_EVENTS	106	0.226408	0.897109	0.613546	1	1	2129	tags=28%, list=20%, signal=35%
FARMER_BREAST_CANCER_CLUSTER_2	20	0.396622	0.8967	0.56654	1	1	2221	tags=30%, list=21%, signal=38%
WANG_PROSTATE_CANCER_ANDROGEN_INDEPENDENT	34	0.237968	0.896369	0.619608	1	1	2679	tags=32%, list=25%, signal=43%
REACTOME_PYRUVATE_METABOLISM_AND_CITRIC_ACID_TCA_CYCLE	23	0.306885	0.895068	0.566802	1	1	2597	tags=35%, list=24%, signal=46%
MARIADASON_RESPONSE_TO_CURCUMIN_SULINDAC_5	15	0.320361	0.894765	0.601961	1	1	2379	tags=33%, list=22%, signal=43%
MCDOWELL_ACUTE_LUNG_INJURY_UP	35	0.284526	0.894659	0.573557	1	1	1862	tags=31%, list=17%, signal=38%
BERTUCCI_INVASIVE_CARCINOMA_DUCTAL_VS_LOBULAR_DN	25	0.295435	0.894449	0.590631	1	1	2977	tags=44%, list=27%, signal=61%
RIZ_ERYTHROID_DIFFERENTIATION	40	0.261621	0.892603	0.590551	1	1	4135	tags=45%, list=38%, signal=73%
GAUSSMANN_MLL_AF4_FUSION_TARGETS_F_DN	27	0.281853	0.892311	0.621212	1	1	1578	tags=22%, list=15%, signal=26%
KAUFFMANN_DNA_REPAIR_GENES	127	0.231763	0.891829	0.586207	1	1	3409	tags=32%, list=31%, signal=47%
LEE_CALORIE_RESTRICTION_MUSCLE_DN	27	0.262083	0.891742	0.615385	1	1	1962	tags=26%, list=18%, signal=32%
IWANAGA_CARCINOGENESIS_BY_KRAS_PTEN_UP	104	0.202456	0.891634	0.664622	1	1	2772	tags=32%, list=26%, signal=42%
KEGG_FRUCTOSE_AND_MANNOSE_METABOLISM	22	0.309232	0.891267	0.558366	1	1	1337	tags=23%, list=12%, signal=26%
REACTOME_AMYLOIDS	46	0.294835	0.88932	0.567729	1	1	3403	tags=43%, list=31%, signal=63%
REACTOME_ACTIVATION_OF_NMDA_RECEPTOR_UPON_GLUTAMATE_BINDING_AND_POSTSYNAPTIC_EVENTS	20	0.283971	0.889294	0.610309	1	1	1397	tags=20%, list=13%, signal=23%
KEGG_FC_EPSILON_RI_SIGNALING_PATHWAY	50	0.24462	0.889186	0.600406	1	1	1523	tags=18%, list=14%, signal=21%
BRUINS_UVC_RESPONSE_VIA_TP53_GROUP_A	497	0.176115	0.888586	0.745098	1	1	2302	tags=23%, list=21%, signal=28%
NIKOLSKY_BREAST_CANCER_12Q13_Q21_AMPLICON	21	0.340479	0.888138	0.561122	1	1	2711	tags=38%, list=25%, signal=51%
BOYLAN_MULTIPLE_MYELOMA_C_CLUSTER_UP	23	0.273151	0.887107	0.628627	1	1	2984	tags=39%, list=28%, signal=54%
AMIT_EGF_RESPONSE_40_HELA	26	0.301562	0.886791	0.575875	1	1	4153	tags=46%, list=38%, signal=75%
REACTOME_METABOLISM_OF_PROTEINS	262	0.22729	0.886154	0.561404	1	1	2849	tags=32%, list=26%, signal=42%
REACTOME_TRIF_MEDIATED_TLR3_SIGNALING	41	0.237201	0.885951	0.576699	1	1	1862	tags=22%, list=17%, signal=26%
LEE_BMP2_TARGETS_DN	494	0.221585	0.885931	0.570076	1	1	3151	tags=33%, list=29%, signal=44%
FRASOR_RESPONSE_TO_SERM_OR_FULVESTRANT_DN	31	0.321462	0.884841	0.559615	1	1	4435	tags=45%, list=41%, signal=76%
ZHANG_BREAST_CANCER_PROGENITORS_DN	86	0.196068	0.884545	0.678431	1	1	1009	tags=13%, list=9%, signal=14%
GILDEA_METASTASIS	19	0.308803	0.884329	0.598826	1	1	1557	tags=26%, list=14%, signal=31%
APPIERTO_RESPONSE_TO_FENRETINIDE_UP	24	0.276717	0.884148	0.604697	1	1	1803	tags=29%, list=17%, signal=35%
REACTOME_INTEGRIN_ALPHAIIB_BETA3_SIGNALING	16	0.330514	0.883865	0.601643	1	1	4391	tags=69%, list=41%, signal=115%
PLASARI_TGFB1_TARGETS_10HR_UP	120	0.243781	0.882689	0.608031	1	1	1356	tags=20%, list=13%, signal=23%
LEE_LIVER_CANCER_SURVIVAL_UP	104	0.232197	0.88216	0.619329	1	1	2500	tags=29%, list=23%, signal=37%
WANG_RESPONSE_TO_ANDROGEN_UP	17	0.298771	0.882127	0.62089	1	1	1803	tags=24%, list=17%, signal=28%
SHETH_LIVER_CANCER_VS_TXNIP_LOSS_PAM6	30	0.255151	0.880865	0.616142	1	1	1410	tags=20%, list=13%, signal=23%
YAGI_AML_WITH_T_9_11_TRANSLOCATION	80	0.198238	0.880701	0.700197	1	1	2336	tags=28%, list=22%, signal=35%
GRABARCZYK_BCL11B_TARGETS_UP	43	0.250676	0.879245	0.639752	1	1	2964	tags=33%, list=27%, signal=45%
WIERENGA_PML_INTERACTOME	20	0.29473	0.877497	0.592803	1	1	881	tags=15%, list=8%, signal=16%
NAKAMURA_METASTASIS_MODEL_UP	24	0.274619	0.877062	0.645544	1	1	1654	tags=25%, list=15%, signal=29%
WEIGEL_OXIDATIVE_STRESS_RESPONSE	20	0.316952	0.8769	0.62253	1	1	4135	tags=45%, list=38%, signal=73%
PEDERSEN_TARGETS_OF_611CTF_ISOFORM_OF_ERBB2	43	0.269705	0.876663	0.604331	1	1	1430	tags=21%, list=13%, signal=24%
STOSSI_RESPONSE_TO_ESTRADIOL	30	0.248574	0.876493	0.657744	1	1	1014	tags=13%, list=9%, signal=15%
MEISSNER_NPC_HCP_WITH_H3K4ME2	287	0.202437	0.875289	0.673267	1	1	2235	tags=24%, list=21%, signal=29%
REACTOME_PI3K_AKT_ACTIVATION	18	0.301919	0.875036	0.640404	1	1	4391	tags=50%, list=41%, signal=84%
REACTOME_BMAL1_CLOCK_NPAS2_ACTIVATES_CIRCADIAN_EXPRESSION	19	0.290262	0.874481	0.610568	1	1	3146	tags=47%, list=29%, signal=67%
KYNG_ENVIRONMENTAL_STRESS_RESPONSE_UP	37	0.241192	0.873796	0.635496	1	1	3780	tags=49%, list=35%, signal=74%
LIU_CMYB_TARGETS_UP	99	0.203985	0.873506	0.671815	1	1	1839	tags=21%, list=17%, signal=25%
SU_PANCREAS	29	0.262731	0.873415	0.630522	1	1	1234	tags=17%, list=11%, signal=19%
REACTOME_MAP_KINASE_ACTIVATION_IN_TLR_CASCADE	29	0.245996	0.873387	0.645544	1	1	1862	tags=24%, list=17%, signal=29%
BRUECKNER_TARGETS_OF_MIRLET7A3_UP	64	0.229899	0.872216	0.626692	1	1	1794	tags=25%, list=17%, signal=30%
TIEN_INTESTINE_PROBIOTICS_6HR_UP	39	0.282388	0.871956	0.579568	1	1	2254	tags=28%, list=21%, signal=35%
WANG_HCP_PROSTATE_CANCER	60	0.2135	0.871082	0.684411	1	1	3109	tags=33%, list=29%, signal=46%
REACTOME_FRS2_MEDIATED_CASCADE	17	0.298171	0.870739	0.661224	1	1	2705	tags=41%, list=25%, signal=55%
REACTOME_MEIOSIS	62	0.255383	0.870132	0.578337	1	1	3403	tags=37%, list=31%, signal=54%
VANTVEER_BREAST_CANCER_ESR1_UP	98	0.209738	0.870071	0.671233	1	1	1202	tags=16%, list=11%, signal=18%
HU_GENOTOXIN_ACTION_DIRECT_VS_INDIRECT_24HR	29	0.247644	0.86996	0.651751	1	1	3579	tags=45%, list=33%, signal=67%
GOTZMANN_EPITHELIAL_TO_MESENCHYMAL_TRANSITION_DN	127	0.196752	0.869651	0.689524	1	1	2968	tags=29%, list=27%, signal=40%
GOLDRATH_HOMEOSTATIC_PROLIFERATION	110	0.206012	0.869273	0.632768	1	1	3543	tags=40%, list=33%, signal=59%
DAZARD_RESPONSE_TO_UV_NHEK_UP	143	0.2356	0.868671	0.624046	1	1	1874	tags=24%, list=17%, signal=28%
BUYTAERT_PHOTODYNAMIC_THERAPY_STRESS_DN	388	0.18383	0.867533	0.653257	1	1	3153	tags=30%, list=29%, signal=40%
LIU_PROSTATE_CANCER_UP	50	0.228056	0.867522	0.661943	1	1	3340	tags=36%, list=31%, signal=52%
RICKMAN_HEAD_AND_NECK_CANCER_D	22	0.383364	0.867214	0.645914	1	1	1645	tags=41%, list=15%, signal=48%
TAKAO_RESPONSE_TO_UVB_RADIATION_DN	54	0.222101	0.867175	0.649225	1	1	3391	tags=41%, list=31%, signal=59%
MALONEY_RESPONSE_TO_17AAG_DN	48	0.27017	0.865705	0.578755	1	1	3130	tags=35%, list=29%, signal=50%
ST_G_ALPHA_I_PATHWAY	17	0.278028	0.864059	0.672304	1	1	1363	tags=24%, list=13%, signal=27%
IIZUKA_LIVER_CANCER_PROGRESSION_G1_G2_DN	16	0.289981	0.863428	0.636183	1	1	458	tags=13%, list=4%, signal=13%
ABE_INNER_EAR	28	0.279388	0.863221	0.628742	1	1	3214	tags=39%, list=30%, signal=56%
MEDINA_SMARCA4_TARGETS	29	0.264791	0.863145	0.63	1	1	3337	tags=41%, list=31%, signal=60%
LEE_LIVER_CANCER_MYC_DN	35	0.270027	0.863129	0.638	1	1	1701	tags=26%, list=16%, signal=30%
HAHTOLA_MYCOSIS_FUNGOIDES_SKIN_UP	107	0.199693	0.862908	0.673387	1	1	2878	tags=33%, list=27%, signal=44%
LAU_APOPTOSIS_CDKN2A_UP	36	0.240171	0.862836	0.666038	1	1	394	tags=11%, list=4%, signal=11%
WHITE_NEUROBLASTOMA_WITH_1P36.3_DELETION	15	0.335141	0.862243	0.609284	1	1	3919	tags=67%, list=36%, signal=104%
ASTIER_INTEGRIN_SIGNALING	27	0.252313	0.862171	0.651163	1	1	1862	tags=26%, list=17%, signal=31%
WATTEL_AUTONOMOUS_THYROID_ADENOMA_UP	43	0.228193	0.862154	0.690476	1	1	2344	tags=23%, list=22%, signal=30%
YEGNASUBRAMANIAN_PROSTATE_CANCER	70	0.23131	0.862059	0.668687	1	1	1970	tags=20%, list=18%, signal=24%
TAKAO_RESPONSE_TO_UVB_RADIATION_UP	44	0.278002	0.861642	0.59252	1	1	4701	tags=64%, list=43%, signal=112%
IIZUKA_LIVER_CANCER_PROGRESSION_G2_G3_UP	16	0.297441	0.861576	0.630952	1	1	1368	tags=19%, list=13%, signal=21%
MULLIGHAN_MLL_SIGNATURE_1_DN	122	0.185228	0.859703	0.742633	1	1	932	tags=11%, list=9%, signal=12%
REACTOME_BIOLOGICAL_OXIDATIONS	76	0.271005	0.858952	0.67002	1	1	3372	tags=43%, list=31%, signal=63%
REACTOME_LIPID_DIGESTION_MOBILIZATION_AND_TRANSPORT	27	0.265973	0.858151	0.639676	1	1	2228	tags=26%, list=21%, signal=33%
OKAWA_NEUROBLASTOMA_1P36_31_DELETION	16	0.329765	0.857698	0.608108	1	1	4086	tags=69%, list=38%, signal=110%
MCBRYAN_PUBERTAL_BREAST_6_7WK_DN	51	0.236221	0.857347	0.615094	1	1	1216	tags=16%, list=11%, signal=18%
ABBUD_LIF_SIGNALING_1_UP	29	0.278488	0.857305	0.616142	1	1	722	tags=14%, list=7%, signal=15%
URS_ADIPOCYTE_DIFFERENTIATION_UP	54	0.226291	0.857043	0.672764	1	1	2647	tags=35%, list=24%, signal=46%
HOSHIDA_LIVER_CANCER_SURVIVAL_UP	46	0.234888	0.856909	0.656604	1	1	1456	tags=22%, list=13%, signal=25%
BIOCARTA_CCR3_PATHWAY	16	0.275635	0.856738	0.664583	1	1	3235	tags=31%, list=30%, signal=44%
SANA_RESPONSE_TO_IFNG_DN	48	0.252275	0.856577	0.639535	1	1	2325	tags=27%, list=21%, signal=34%
HALMOS_CEBPA_TARGETS_DN	24	0.279639	0.85586	0.65748	1	1	1553	tags=21%, list=14%, signal=24%
KEGG_PHOSPHATIDYLINOSITOL_SIGNALING_SYSTEM	47	0.233646	0.855173	0.691206	1	1	2044	tags=23%, list=19%, signal=29%
LY_AGING_OLD_DN	35	0.304849	0.854581	0.586466	1	1	2325	tags=29%, list=21%, signal=36%
COULOUARN_TEMPORAL_TGFB1_SIGNATURE_DN	79	0.23082	0.854428	0.677606	1	1	3344	tags=34%, list=31%, signal=49%
CHANDRAN_METASTASIS_UP	119	0.198229	0.854332	0.68616	1	1	3563	tags=34%, list=33%, signal=51%
PID_ENDOTHELIN_PATHWAY	39	0.241646	0.854192	0.653772	1	1	2086	tags=26%, list=19%, signal=32%
TONKS_TARGETS_OF_RUNX1_RUNX1T1_FUSION_GRANULOCYTE_UP	33	0.246317	0.854033	0.679513	1	1	2650	tags=30%, list=24%, signal=40%
YAO_TEMPORAL_RESPONSE_TO_PROGESTERONE_CLUSTER_6	46	0.235741	0.853978	0.655577	1	1	2500	tags=28%, list=23%, signal=37%
ACEVEDO_LIVER_CANCER_WITH_H3K9ME3_UP	66	0.214204	0.85321	0.735586	1	1	1515	tags=20%, list=14%, signal=23%
KIM_TIAL1_TARGETS	17	0.30874	0.852185	0.613592	1	1	2018	tags=29%, list=19%, signal=36%
KESHELAVA_MULTIPLE_DRUG_RESISTANCE	47	0.236742	0.85212	0.643154	1	1	1377	tags=19%, list=13%, signal=22%
MEISSNER_NPC_HCP_WITH_H3K27ME3	43	0.242232	0.850655	0.701863	1	1	3232	tags=40%, list=30%, signal=56%
HSIAO_LIVER_SPECIFIC_GENES	128	0.285989	0.850553	0.646939	1	1	2467	tags=36%, list=23%, signal=46%
MOHANKUMAR_TLX1_TARGETS_DN	97	0.218677	0.850544	0.685658	1	1	1090	tags=16%, list=10%, signal=18%
REACTOME_PERK_REGULATED_GENE_EXPRESSION	16	0.288231	0.849231	0.653923	1	1	1211	tags=25%, list=11%, signal=28%
REACTOME_SRP_DEPENDENT_COTRANSLATIONAL_PROTEIN_TARGETING_TO_MEMBRANE	66	0.333898	0.848134	0.60161	1	1	2971	tags=45%, list=27%, signal=62%
NIKOLSKY_BREAST_CANCER_17Q11_Q21_AMPLICON	75	0.273564	0.848059	0.634799	1	1	1491	tags=20%, list=14%, signal=23%
LEE_TARGETS_OF_PTCH1_AND_SUFU_DN	44	0.240727	0.847538	0.680244	1	1	1787	tags=18%, list=17%, signal=22%
BRACHAT_RESPONSE_TO_CAMPTOTHECIN_DN	28	0.267145	0.846978	0.625767	1	1	2796	tags=32%, list=26%, signal=43%
ST_ADRENERGIC	21	0.264678	0.845768	0.686722	1	1	1561	tags=19%, list=14%, signal=22%
LEE_LIVER_CANCER_CIPROFIBRATE_UP	35	0.251636	0.84569	0.706499	1	1	2371	tags=34%, list=22%, signal=44%
PARK_HSC_AND_MULTIPOTENT_PROGENITORS	36	0.229307	0.845296	0.706107	1	1	1270	tags=14%, list=12%, signal=16%
GRADE_COLON_CANCER_UP	486	0.21065	0.844914	0.598425	1	1	3560	tags=37%, list=33%, signal=52%
IVANOVA_HEMATOPOIESIS_INTERMEDIATE_PROGENITOR	83	0.208012	0.844063	0.696673	1	1	3437	tags=34%, list=32%, signal=49%
BOUDOUKHA_BOUND_BY_IGF2BP2	73	0.211925	0.843311	0.662	1	1	3652	tags=40%, list=34%, signal=60%
BASAKI_YBX1_TARGETS_DN	212	0.196928	0.843238	0.686475	1	1	2850	tags=30%, list=26%, signal=40%
PID_HDAC_CLASSIII_PATHWAY	16	0.293148	0.843194	0.661972	1	1	1782	tags=19%, list=16%, signal=22%
PID_IL1_PATHWAY	18	0.275045	0.842512	0.648871	1	1	3132	tags=44%, list=29%, signal=62%
BROWNE_HCMV_INFECTION_2HR_DN	25	0.267761	0.842504	0.659048	1	1	2977	tags=40%, list=27%, signal=55%
SHIPP_DLBCL_VS_FOLLICULAR_LYMPHOMA_DN	26	0.331831	0.841682	0.592742	1	1	4719	tags=58%, list=44%, signal=102%
LEE_CALORIE_RESTRICTION_MUSCLE_UP	20	0.28768	0.841067	0.666667	1	1	104	tags=10%, list=1%, signal=10%
BIOCARTA_DEATH_PATHWAY	18	0.269924	0.840482	0.6787	1	1	3087	tags=39%, list=29%, signal=54%
ACEVEDO_LIVER_CANCER_WITH_H3K9ME3_DN	64	0.219705	0.839194	0.679089	1	1	810	tags=14%, list=7%, signal=15%
ISSAEVA_MLL2_TARGETS	34	0.271883	0.838975	0.642718	1	1	424	tags=12%, list=4%, signal=12%
BILANGES_SERUM_AND_RAPAMYCIN_SENSITIVE_GENES	43	0.349664	0.838501	0.615538	1	1	2127	tags=30%, list=20%, signal=37%
BILD_HRAS_ONCOGENIC_SIGNATURE	149	0.222924	0.83643	0.657744	1	1	3333	tags=38%, list=31%, signal=54%
KOYAMA_SEMA3B_TARGETS_UP	168	0.194935	0.836103	0.723529	1	1	2107	tags=23%, list=19%, signal=28%
KEGG_RETINOL_METABOLISM	28	0.317381	0.835891	0.709677	1	1	3346	tags=54%, list=31%, signal=77%
RICKMAN_TUMOR_DIFFERENTIATED_WELL_VS_POORLY_UP	142	0.224798	0.835721	0.64959	1	1	3510	tags=37%, list=32%, signal=53%
BAE_BRCA1_TARGETS_UP	37	0.226583	0.835294	0.707602	1	1	3096	tags=30%, list=29%, signal=41%
REACTOME_PROTEIN_FOLDING	37	0.245809	0.835054	0.667969	1	1	2756	tags=32%, list=25%, signal=43%
KEGG_AMINO_SUGAR_AND_NUCLEOTIDE_SUGAR_METABOLISM	28	0.26076	0.835027	0.646123	1	1	2049	tags=29%, list=19%, signal=35%
MOREAUX_MULTIPLE_MYELOMA_BY_TACI_DN	94	0.228021	0.834437	0.611855	1	1	4059	tags=43%, list=37%, signal=67%
ZHANG_TLX_TARGETS_UP	58	0.239216	0.833719	0.691849	1	1	1903	tags=26%, list=18%, signal=31%
LEE_METASTASIS_AND_ALTERNATIVE_SPLICING_UP	48	0.221728	0.83347	0.729622	1	1	3379	tags=35%, list=31%, signal=51%
CHIARADONNA_NEOPLASTIC_TRANSFORMATION_KRAS_UP	72	0.23067	0.833409	0.677606	1	1	3076	tags=32%, list=28%, signal=44%
REACTOME_TRANSPORT_OF_RIBONUCLEOPROTEINS_INTO_THE_HOST_NUCLEUS	15	0.301549	0.832747	0.653775	1	1	2937	tags=47%, list=27%, signal=64%
CHAUHAN_RESPONSE_TO_METHOXYESTRADIOL_UP	32	0.270183	0.832294	0.658672	1	1	1493	tags=19%, list=14%, signal=22%
MORI_SMALL_PRE_BII_LYMPHOCYTE_UP	49	0.210397	0.832073	0.735178	1	1	2017	tags=24%, list=19%, signal=30%
KOYAMA_SEMA3B_TARGETS_DN	236	0.164067	0.831757	0.805825	1	1	3037	tags=29%, list=28%, signal=40%
VANTVEER_BREAST_CANCER_METASTASIS_DN	66	0.260511	0.831609	0.607422	1	1	2459	tags=29%, list=23%, signal=37%
GRAHAM_CML_QUIESCENT_VS_NORMAL_QUIESCENT_UP	48	0.247634	0.831534	0.635161	1	1	1877	tags=25%, list=17%, signal=30%
GRAESSMANN_RESPONSE_TO_MC_AND_DOXORUBICIN_UP	342	0.192411	0.831173	0.692771	1	1	1966	tags=20%, list=18%, signal=24%
SHEPARD_CRUSH_AND_BURN_MUTANT_UP	113	0.20365	0.830853	0.705776	1	1	2439	tags=27%, list=23%, signal=35%
CHIANG_LIVER_CANCER_SUBCLASS_PROLIFERATION_DN	91	0.248472	0.830759	0.692308	1	1	3384	tags=40%, list=31%, signal=57%
BOYLAN_MULTIPLE_MYELOMA_C_DN	32	0.24456	0.830266	0.663202	1	1	3729	tags=47%, list=34%, signal=71%
KEGG_HYPERTROPHIC_CARDIOMYOPATHY_HCM	53	0.244363	0.829768	0.712644	1	1	1900	tags=23%, list=18%, signal=27%
BECKER_TAMOXIFEN_RESISTANCE_DN	28	0.253435	0.828061	0.686627	1	1	1456	tags=21%, list=13%, signal=25%
REACTOME_DNA_REPAIR	62	0.238754	0.827948	0.654064	1	1	3703	tags=39%, list=34%, signal=58%
NAGASHIMA_NRG1_SIGNALING_DN	30	0.259962	0.827124	0.692308	1	1	2852	tags=33%, list=26%, signal=45%
REACTOME_FORMATION_OF_RNA_POL_II_ELONGATION_COMPLEX_	16	0.287188	0.825885	0.689189	1	1	3033	tags=44%, list=28%, signal=61%
SARRIO_EPITHELIAL_MESENCHYMAL_TRANSITION_DN	80	0.227146	0.824242	0.660819	1	1	1708	tags=23%, list=16%, signal=27%
EPPERT_LSC_R	23	0.275868	0.824237	0.655446	1	1	4424	tags=57%, list=41%, signal=95%
SU_PLACENTA	17	0.295852	0.822785	0.708984	1	1	2313	tags=35%, list=21%, signal=45%
REACTOME_MITOTIC_PROMETAPHASE	43	0.27954	0.82156	0.622391	1	1	2330	tags=33%, list=22%, signal=41%
SERVITJA_LIVER_HNF1A_TARGETS_UP	87	0.194575	0.820506	0.793561	1	1	3188	tags=32%, list=29%, signal=45%
KYNG_DNA_DAMAGE_BY_UV	43	0.215661	0.819516	0.738462	1	1	2661	tags=28%, list=25%, signal=37%
ZHOU_TNF_SIGNALING_30MIN	34	0.273478	0.819213	0.657795	1	1	1702	tags=21%, list=16%, signal=24%
WONG_IFNA2_RESISTANCE_DN	17	0.258699	0.819033	0.733591	1	1	1458	tags=18%, list=13%, signal=20%
REACTOME_GLYCEROPHOSPHOLIPID_BIOSYNTHESIS	54	0.204102	0.818811	0.776892	1	1	2065	tags=20%, list=19%, signal=25%
PID_REELIN_PATHWAY	16	0.284372	0.8187	0.659319	1	1	3335	tags=38%, list=31%, signal=54%
ICHIBA_GRAFT_VERSUS_HOST_DISEASE_35D_DN	32	0.24939	0.818015	0.693837	1	1	2863	tags=41%, list=26%, signal=55%
PID_AR_TF_PATHWAY	31	0.254494	0.817717	0.678279	1	1	1448	tags=16%, list=13%, signal=19%
RIZ_ERYTHROID_DIFFERENTIATION_HEMGN	20	0.273429	0.817678	0.6826	1	1	2470	tags=35%, list=23%, signal=45%
HINATA_NFKB_TARGETS_KERATINOCYTE_UP	50	0.268791	0.815581	0.692771	1	1	1678	tags=26%, list=15%, signal=31%
KIM_WT1_TARGETS_8HR_DN	72	0.188372	0.815351	0.804598	1	1	3050	tags=33%, list=28%, signal=46%
TURASHVILI_BREAST_NORMAL_DUCTAL_VS_LOBULAR_UP	37	0.231648	0.815289	0.706349	1	1	3495	tags=35%, list=32%, signal=52%
HUMMERICH_SKIN_CANCER_PROGRESSION_UP	61	0.240826	0.814005	0.667984	1	1	1862	tags=28%, list=17%, signal=33%
GAL_LEUKEMIC_STEM_CELL_UP	83	0.190219	0.813945	0.806517	1	1	2660	tags=25%, list=25%, signal=33%
KEGG_PPAR_SIGNALING_PATHWAY	37	0.23751	0.813682	0.735812	1	1	1326	tags=19%, list=12%, signal=21%
LIU_CDX2_TARGETS_UP	17	0.292188	0.813215	0.65643	1	1	4303	tags=59%, list=40%, signal=97%
MANALO_HYPOXIA_DN	158	0.249785	0.812637	0.616105	1	1	3821	tags=39%, list=35%, signal=59%
MEISSNER_BRAIN_HCP_WITH_H3_UNMETHYLATED	21	0.268054	0.812372	0.762887	1	1	1330	tags=19%, list=12%, signal=22%
KYNG_RESPONSE_TO_H2O2_VIA_ERCC6_DN	21	0.265819	0.810494	0.678571	1	1	2428	tags=29%, list=22%, signal=37%
REACTOME_LATE_PHASE_OF_HIV_LIFE_CYCLE	44	0.236017	0.810364	0.663586	1	1	3556	tags=45%, list=33%, signal=67%
PID_NCADHERIN_PATHWAY	19	0.271737	0.810148	0.701581	1	1	1903	tags=21%, list=18%, signal=25%
BIOCARTA_IL1R_PATHWAY	19	0.26092	0.809514	0.745665	1	1	3894	tags=42%, list=36%, signal=66%
DAZARD_UV_RESPONSE_CLUSTER_G2	20	0.285157	0.808066	0.719165	1	1	1872	tags=25%, list=17%, signal=30%
YANG_BREAST_CANCER_ESR1_DN	17	0.256769	0.807995	0.737052	1	1	3247	tags=41%, list=30%, signal=59%
ENK_UV_RESPONSE_EPIDERMIS_DN	300	0.175673	0.80767	0.763566	1	1	3364	tags=33%, list=31%, signal=47%
GARY_CD5_TARGETS_DN	247	0.203047	0.807649	0.675097	1	1	3594	tags=37%, list=33%, signal=54%
SESTO_RESPONSE_TO_UV_C5	29	0.271912	0.807613	0.67126	1	1	4628	tags=62%, list=43%, signal=108%
VART_KSHV_INFECTION_ANGIOGENIC_MARKERS_UP	84	0.230886	0.805838	0.693798	1	1	1339	tags=18%, list=12%, signal=20%
PID_WNT_CANONICAL_PATHWAY	15	0.281753	0.80498	0.726531	1	1	2642	tags=27%, list=24%, signal=35%
MULLIGHAN_MLL_SIGNATURE_2_DN	141	0.170657	0.80472	0.857143	1	1	681	tags=10%, list=6%, signal=10%
KANG_IMMORTALIZED_BY_TERT_UP	49	0.21101	0.804429	0.772908	1	1	1379	tags=18%, list=13%, signal=21%
HUMMERICH_SKIN_CANCER_PROGRESSION_DN	68	0.228769	0.804082	0.736196	1	1	2126	tags=25%, list=20%, signal=31%
RAMASWAMY_METASTASIS_UP	46	0.232092	0.803716	0.709056	1	1	3991	tags=43%, list=37%, signal=69%
REACTOME_MEIOTIC_RECOMBINATION	46	0.261121	0.803175	0.646388	1	1	3403	tags=39%, list=31%, signal=57%
GAVIN_FOXP3_TARGETS_CLUSTER_P7	49	0.215067	0.80236	0.773931	1	1	2584	tags=24%, list=24%, signal=32%
SCHLOSSER_MYC_TARGETS_REPRESSED_BY_SERUM	93	0.245648	0.802206	0.664783	1	1	3087	tags=30%, list=29%, signal=42%
FIGUEROA_AML_METHYLATION_CLUSTER_6_UP	71	0.196374	0.801926	0.805611	1	1	3523	tags=34%, list=33%, signal=50%
ENGELMANN_CANCER_PROGENITORS_DN	44	0.240104	0.801683	0.743028	1	1	3274	tags=45%, list=30%, signal=65%
KEGG_ETHER_LIPID_METABOLISM	21	0.264279	0.799862	0.734252	1	1	1647	tags=24%, list=15%, signal=28%
CHIARADONNA_NEOPLASTIC_TRANSFORMATION_KRAS_CDC25_UP	32	0.253889	0.799552	0.7	1	1	2746	tags=25%, list=25%, signal=33%
PYEON_HPV_POSITIVE_TUMORS_UP	56	0.254843	0.798992	0.651663	1	1	2019	tags=21%, list=19%, signal=26%
DACOSTA_UV_RESPONSE_VIA_ERCC3_COMMON_UP	35	0.224693	0.797804	0.762183	1	1	3104	tags=34%, list=29%, signal=48%
KEGG_SMALL_CELL_LUNG_CANCER	44	0.212831	0.796852	0.790476	1	1	3176	tags=34%, list=29%, signal=48%
GEISS_RESPONSE_TO_DSRNA_UP	19	0.281903	0.796531	0.677043	1	1	17	tags=11%, list=0%, signal=11%
REACTOME_FORMATION_OF_FIBRIN_CLOT_CLOTTING_CASCADE	21	0.326971	0.796319	0.722338	1	1	2649	tags=43%, list=24%, signal=57%
OLSSON_E2F3_TARGETS_DN	25	0.259892	0.796227	0.714844	1	1	1070	tags=16%, list=10%, signal=18%
REACTOME_PHASE_II_CONJUGATION	41	0.234057	0.795111	0.758551	1	1	3372	tags=39%, list=31%, signal=56%
BROWNE_HCMV_INFECTION_20HR_UP	138	0.170692	0.794509	0.841897	1	1	3496	tags=35%, list=32%, signal=51%
REACTOME_TRANSLATION	88	0.29053	0.794382	0.634195	1	1	3128	tags=41%, list=29%, signal=57%
SMID_BREAST_CANCER_RELAPSE_IN_PLEURA_DN	17	0.289769	0.792814	0.716763	1	1	1080	tags=24%, list=10%, signal=26%
REACTOME_PRE_NOTCH_TRANSCRIPTION_AND_TRANSLATION	15	0.292798	0.791946	0.67562	1	1	2625	tags=33%, list=24%, signal=44%
ZWANG_CLASS_1_TRANSIENTLY_INDUCED_BY_EGF	276	0.182504	0.791546	0.773547	1	1	2777	tags=27%, list=26%, signal=35%
BRUINS_UVC_RESPONSE_VIA_TP53_GROUP_C	45	0.204198	0.790857	0.793651	1	1	1745	tags=20%, list=16%, signal=24%
MARSON_BOUND_BY_E2F4_UNSTIMULATED	417	0.202952	0.790399	0.662835	1	1	3578	tags=34%, list=33%, signal=49%
CHANDRAN_METASTASIS_DN	191	0.178414	0.790072	0.849421	1	1	3032	tags=29%, list=28%, signal=40%
[truncated: 383 more rows]

## Sheet: Low expression of STAT3
Table SII. GSEA Kyoto Encyclopedia of Genes and Genomes results. GSEA outcomes of the c5 (c5.all.v6.1.symbols.gmt) reference gene set for the key genes in the Janus kinase-signal transducer and activator of transcription signaling pathway in skin cutaneous melanoma. GSEA, gene set enrichment analysis. GSEA, gene set enrich analysis; KEGG, Kyoto Encyclopedia of Genes and Genomes; ES, enrichment sc…
[truncated: 1,822 more rows]

[truncated: 6 more sheets: High expression of STAT4, Low expression of STAT4, High expression of STAT5B, Low expression of STAT5B, High expression of STAT6, Low expression of STAT6]
